# Supplementary material for: Microbiome and gut as partners in the persistence of post-inflammatory visceral pain: insight into working mechanisms of faecal transplant for therapy advance
Source: Research Square preprint supplement (doi:10.21203/rs.3.rs-6025304/v1), 2025-10-20
Supplement: Supplementary file 1 [file 05cc79d6c4e7a89389d811e7.xlsx]

## Sheet: Body Weight
		Body weight (g)
Treatment	Animal	Day 0	Day 3	Day 6	Day 8	Day 10	Day 13	Day 15	Day 17	Day 19	Day 21	Day 23	Day 26	Day 30	Day 32
abx + FMTCTR	1N	303	301	310	314	328	327	332	342	357	359	357	366	375	376
	2N	300	309	315	314	317	320	320	330	344	350	352	359	361	370
	3N	305	293	308	309	316	319	320	327	335	335	338	343	355	360
	4N	278	282	288	285	285	290	293	293	302	307	309	313	309	316
	5N	264	250	270	270	269	276	279	282	292	295	296	302	303	309
	6N	289	297	302	309	310	306	311	323	338	340	343	346	351	356
	7N	290	278	311	316	315	316	319	327	340	343	347	350	357	365
	8N	300	315	321	318	329	330	330	340	354	351	360	366	377	382
abx + FMTDNBS	1V	291	306	311	308	308	306	309	315	325	319	311	312	324	327
	2V	279	287	293	298	300	303	306	311	316	320	326	323	331	334
	3V	288	296	310	311	305	309	313	318	330	333	336	342	346	355
	4V	292	305	314	320	314	319	322	327	342	347	344	349	357	362
	5V	304	310	317	323	321	328	331	337	345	351	353	359	366	374
	6V	306	312	319	325	332	330	337	342	357	357	361	368	380	381
	7V	305	293	303	312	303	308	307	313	323	327	333	343	327	334
	8V	269	279	281	280	285	283	288	297	307	313	319	324	335	337
abx + veh	9N	297	299	310	321	321	322	328	332	343	346	355	358	363	373
	10N	297	304	309	319	314	315	322	331	346	346	348	353	362	368
	9V	290	296	309	321	316	319	320	326	334	340	344	346	338	346
	10V	289	296	308	318	315	319	317	332	336	341	347	352	348	354
veh + veh	1B	282	294	307	307	311	321	323	324	333	333	332	342	351	356
	2B	292	305	322	325	327	333	335	342	347	343	343	353	367	372
	3B	279	287	302	306	306	312	315	318	325	305	309	318	333	338
	4B	289	304	314	321	324	325	329	335	341	333	342	349	363	374

## Sheet: Behavioural Tests
			Visceral pain - AWR in response to CRD																									Somatic pain
Treatment	Animal		Day 8					Day 13					Day 19					Day 26					Day 32					HOT PLATE (48°C)	HOT PLATE (50°C)	PAW PRESSURE
			0.5 ml	1 ml	2 ml	3 ml		0.5 ml	1 ml	2 ml	3 ml		0.5 ml	1 ml	2 ml	3 ml		0.5 ml	1 ml	2 ml	3 ml		0.5 ml	1 ml	2 ml	3 ml		Licking latency (s)	Licking latency (s)	Paw withdrawal threshold (g)
abx + FMTCTR	1N		0	1	2	2.5		0	0.5	1.75	2.5		0	0.5	1.5	2.5		0	0	0.5	2		0	0.5	2	2.5		17	13	65
	2N		0	0.5	1.5	2		0	0	2	3		0	0	2	2		0	0	0.5	2		0	0	1	2		19	14	60
	3N		0	1	2	2.5		0	0	1	2		0	0	1.5	2.5		0	0.5	1.5	2.5		0	0.5	1.5	2.5		18	10.5	55
	4N		1	2	3	4		0	1	2.5	3		0.5	1.5	2	3		0.5	1	2	3.5		0.5	1	2	2.5		18	14	60
	5N		0.5	1.5	2	3		0.5	1	2	2.5		0	0	1.5	2		0	0	1	2		0	0.5	1.5	2		18	12	67.5
	6N		0	1	2.5	2.75		0	0	0.5	2		0	1	1.5	2.5		0	0	1.5	2.5		0	0	1.5	2		19	12.5	65
	7N		0	1.5	3	3		0	0	1	3		0	0	2	2.5		0	0.5	2.5	3.5		0	0	1.5	3		17.5	12	65
	8N		0	0.5	1.75	3.5		0	0	1	3		0	0.5	1.5	3		0.5	1	2	3		0.5	1	2	2.5		16	10	62.5
abx + FMTDNBS	1V		0.5	1.5	2.75	3		0.5	1	2	3		0	1	2	3		0.5	1	2	3		0.5	1.5	2	2.5		21	11	70
	2V		0.5	1.5	2.75	3		1	1.5	2.5	3		0.5	1.5	1.75	3.5		0.5	1.5	2.5	3.5		0	0	2.5	3.5		22	12	67.5
	3V		0	0.5	2	2.5		0.5	1.5	2	3.5		1	2	3	4		1	2	3	3.5		0	1.5	2	2.5		21	9	60
	4V		1	2	2.5	2.75		0.5	2	2.5	3.5		0	0	2.5	3.5		0	2	3.5	4		0	1.5	2.5	3.5		20	11	67.5
	5V		0	0	2.5	3		0.5	1	2	3		0	0	2	3		0	1	2	3		0	1	2	3		18	11	65
	6V		0.5	1.5	2.5	3		0	0.5	2	3		0	1	2	3		0	1.5	2	3		0	0	2	3		21	12	67.5
	7V		0	0.5	1.5	3.5		0.5	1	2.5	4		0.5	1.5	2.5	3.5		0.5	1.5	2	2.5		0.5	1.5	2.5	3.5		19.5	10	67.5
	8V		0.5	1.5	2.5	3.5		0	1	2	3		1	1	2.5	3.5		0.5	1	2	3.5		0	0	2	3		19	12	67.5
abx + veh	9N		0.5	1	2.5	3		0.5	1	2.5	3		0.5	1	1.5	2		0.5	1.5	2	2.5		0	1	2	3		20	13	62.5
	10N		0	0.5	1.5	2.5		2	2.5	3.5	4		0.5	0	1	2.5		0	0	2	3		0	0	1	2		20	14.5	65
	9V		0.5	1	2	2.75		0	0	1.5	2.5		0	0	1.5	2.5		0	0	0	2		0	1	1.5	2.5		21	10.5	67.5
	10V		0.5	1.5	2.5	3.5		0	0	2	2.5		0	1	1.5	2		0.5	1	1.5	2		0	0	1.5	3		17	12	67.5
veh + veh	1B		0	0.5	1	2.25		0	0	1	2.5		0	0	2	3		0	0	1	2		0	0	1	2		23	15	67.5
	2B		0	0	1.5	2.5		0	0	1	2		0	1	1.5	2.5		0	0	1.5	2		0	0	1	2		22	13	70
	3B		0	0	2	2.75		0	0	1.5	3		0	0	1.5	3		0	0	1.5	2.5		0	0	1.5	2.5		21	12.5	67.5
	4B		0	0	1.5	3		0	0	2	3.5		0	1	1	2		0	0	1	2.5		0	0.5	1.5	2.5		17	14	65

## Sheet: Disease activity
									Histology
Treatment	Animal		Macroscopic Damage Score	Colon lenght (cm)	Ceacum content (g)	Colon weight (g)			Microscopic Damage Score	Mast cell density	Eosinophil density
abx + FMTCTR	1N		0.5	13	5.86	1.88	0.144615		0	0	0
	2N		0.5	10	5.08	0.93	0.093		2	0	0
	3N		0.5	14	5.2	1.33	0.095		0	0.333333	1.33333
	4N		0.5	14.5	4.65	1.34	0.0924138		1	1.66667	0
	5N		0.5	14	6.96	1.36	0.0971429		1	0	1.5
	6N		0.5	15	8.07	1.86	0.124		0	1.33333	2
	7N		0.5	14.5	7.36	1.61	0.111034		0	1	0.333333
	8N		0.5	13	5.29	1.33	0.102308		0	0.666667	2.33333
abx + FMTDNBS	1V		1.5	14	5.04	1.26	0.09		2	0.666667	0
	2V		0.5	14	5.17	1.33	0.095		0	0.333333	0.333333
	3V		0.5	15	4.79	1.5	0.1		0	0.333333	0.666667
	4V		0.5	15	6.4	1.68	0.112		0	0.666667	1.33333
	5V		0.5	15	8.9	1.75	0.116667		0	0.2	5
	6V		0.5	16	12.41	1.44	0.09		0	1.66667	0.666667
	7V		0.5	14	7.79	1.71	0.122143		2	0	0.333333
	8V		0.5	13.5	6.12	1.24	0.0918519		0	2.33333	0
