# Supplementary material for: Microbiome and gut as partners in the persistence of post-inflammatory visceral pain: insight into working mechanisms of faecal transplant for therapy advance
Source: Research Square preprint supplement (doi:10.21203/rs.3.rs-6025304/v1), 2025-10-20
Supplement: Supplementary file 2 [file 111ac1aa981f32658a83d3cb.xlsx]

## Sheet: TherapyModel
pvalue	log2ratio	Protein IDs	Protein names	Gene names	Razor + unique peptides	Mol. weight [kDa]	Intensity	MS/MS count	LFQ intensity 1B_01	LFQ intensity 1B_02	LFQ intensity 1B_03	LFQ intensity 1N_01	LFQ intensity 1N_02	LFQ intensity 1N_03	LFQ intensity 1R_01	LFQ intensity 1R_02	LFQ intensity 1R_03	LFQ intensity 1V_01	LFQ intensity 1V_02	LFQ intensity 1V_03	LFQ intensity 2B_01	LFQ intensity 2B_02	LFQ intensity 2B_03	LFQ intensity 2N_01	LFQ intensity 2N_02	LFQ intensity 2N_03	LFQ intensity 2R_01	LFQ intensity 2R_02	LFQ intensity 2R_03	LFQ intensity 2V_01	LFQ intensity 2V_02	LFQ intensity 2V_03	LFQ intensity 3B_01	LFQ intensity 3B_02	LFQ intensity 3B_03	LFQ intensity 3N_01	LFQ intensity 3N_02	LFQ intensity 3N_03	LFQ intensity 3R_01	LFQ intensity 3R_02	LFQ intensity 3R_03	LFQ intensity 3V_01	LFQ intensity 3V_02	LFQ intensity 3V_03	LFQ intensity 4B_01	LFQ intensity 4B_02	LFQ intensity 4B_03	LFQ intensity 4N_01	LFQ intensity 4N_02
0.00055587	-2.1426	F8SQR5			1	11.684	12270000000	78	26.4241	26.8599	26.5504	27.4199	27.1689	27.3917	27.2247	27.0222	27.0566	27.5652	27.6773	27.624	25.9261	26.1575	26.1018	26.9883	27.3639	27.0561	29.3151	29.2699	29.7684	26.6524	26.798	27.0478	24.2507	24.4833	24.5772	27.4971	27.3465	27.5269	29.1889	29.2234	29.4428	27.9963	27.945	27.0874	27.8833	28.2853	28.2881	26.9545	26.7623
1.70368e-05	-2.01074	M0R7B4		LOC684828	3	22.233	593090000	69	NaN	NaN	NaN	NaN	NaN	NaN	NaN	NaN	NaN	NaN	NaN	NaN	NaN	NaN	NaN	NaN	NaN	NaN	24.648	24.7002	25.0221	24.4893	24.4908	24.6623	NaN	NaN	NaN	NaN	NaN	NaN	25.0403	NaN	24.9788	23.4826	23.332	23.4462	22.9967	22.5471	23.0576	NaN	NaN
0.0182326	-1.12602	E9PTU4		Myh11	5	227.29	8732800000	122	27.3857	27.5324	27.5542	NaN	NaN	NaN	26.2891	26.4643	26.3736	27.6366	27.8394	27.8418	26.6446	26.6253	26.6748	29.5649	29.2706	29.5124	26.8062	26.9063	26.8288	27.5712	27.5268	27.5162	24.955	25.2593	23.0977	27.2129	27.2691	27.2358	27.2332	27.3078	27.072	27.8494	27.7689	27.8513	25.0899	25.3517	24.3229	26.3002	26.3795
0.0012832	-0.857282	A0A0G2JX64;Q91XN6;P04692;A0A0G2K7F7	Tropomyosin alpha-1 chain	Tpm1	11	32.708	35973000000	485	28.3695	28.5606	28.7437	29.2055	29.1082	29.2252	28.7102	28.7406	28.7594	29.2201	29.2867	29.3349	28.5612	28.2042	28.5182	29.0277	27.7136	28.2277	29.6785	30.2037	29.8196	28.8057	28.8001	28.7502	27.0069	28.5347	27.683	28.6173	28.5434	28.6544	29.6549	29.5874	29.3261	29.1536	29.2777	29.3988	29.5098	29.6026	29.4037	28.7808	28.6706
0.0298376	-0.817469	Q66H69	UDP-GlcNAc:betaGal beta-1,3-N-acetylglucosaminyltransferase 7	B3gnt7	7	45.446	295170000	55	NaN	NaN	NaN	22.8743	23.0557	22.7323	22.7543	22.9863	22.7543	22.7329	22.3631	22.8773	NaN	NaN	NaN	23.9329	24.1969	24.2633	22.4138	21.6102	22.4504	NaN	NaN	NaN	NaN	NaN	NaN	NaN	NaN	NaN	22.724	21.88	22.705	NaN	NaN	NaN	21.8324	21.7748	NaN	NaN	NaN
0.00445427	-0.816306	P83732;A0A0H2UH99;M0RBD1	60S ribosomal protein L24	Rpl24	9	17.779	2288900000	143	24.2231	24.1859	24.3154	25.6338	25.6384	25.5321	25.6455	25.817	25.9093	23.868	23.971	NaN	24.3154	24.3415	23.9198	24.3584	25.5707	24.2402	25.4982	25.4919	25.5493	24.5531	24.609	24.6968	24.6417	24.1588	24.4388	25.066	25.0399	25.1991	25.1171	25.0872	25.043	24.9866	24.6669	24.9439	25.8615	25.9284	25.933	25.514	25.6619
0.0232594	-0.805378	A0A0G2K654;P06349			4	21.316	1164900000	148	24.137	24.4241	24.3571	20.5026	20.7053	21.2153	24.5119	24.4352	24.5309	NaN	NaN	NaN	22.5614	22.6625	22.3355	24.5496	NaN	24.6493	24.9128	25.0997	25.1336	25.0728	25.1626	25.2567	24.2905	24.5351	24.6421	22.1613	22.1953	22.1449	25.8253	25.7529	25.6568	24.8768	24.994	25.0081	23.3119	23.6128	23.7626	22.7308	22.4998
0.00142731	-0.758114	D3ZBN0	Histone H1.5	Hist1h1b	7	22.649	1022800000	107	23.5459	23.8204	23.5311	NaN	NaN	NaN	24.3176	24.2252	24.1711	NaN	NaN	NaN	23.4713	23.3048	23.2003	24.1943	24.3898	24.3218	25.1199	25.5271	25.3047	24.7335	24.6081	24.6773	24.556	24.375	24.7466	NaN	22.5036	NaN	25.2654	24.8538	25.3608	23.7185	23.524	24.0178	24.6656	24.5256	24.6493	23.7273	23.4561
0.0191059	-0.745195	F7FL00;A2IBE1		Car9	4	47.151	727740000	22	24.1265	23.6889	24.0776	24.0783	24.2659	24.1957	NaN	NaN	NaN	NaN	NaN	NaN	NaN	23.9949	NaN	NaN	NaN	NaN	NaN	NaN	NaN	NaN	NaN	NaN	NaN	NaN	NaN	NaN	NaN	24.2246	NaN	NaN	NaN	23.8277	NaN	NaN	23.6424	NaN	23.9095	24.0754	NaN
0.0130252	-0.715405	A0A0G2K1E2			6	119.46	255620000	73	NaN	NaN	21.9389	22.6741	NaN	21.3979	21.9265	22.2402	NaN	22.1134	21.4172	21.4223	NaN	21.7444	21.767	22.5991	22.4652	23.9428	NaN	NaN	22.417	NaN	NaN	NaN	NaN	NaN	NaN	22.8583	22.7805	23.2909	NaN	NaN	NaN	22.4086	22.2452	21.819	NaN	NaN	NaN	NaN	21.426
8.26782e-05	-0.682589	A0A0G2K8S9;Q6AYJ9;Q91YC0		Art3	6	48.205	800420000	80	NaN	23.4535	22.9059	23.7836	23.8853	24.1429	23.5849	23.733	23.6313	22.7376	22.9352	22.6774	23.2109	23.3397	23.2823	NaN	NaN	NaN	24.0828	22.9268	23.93	23.2918	23.1735	22.8785	22.9284	23.2411	23.2984	24.5303	24.0931	24.0992	NaN	NaN	NaN	23.9747	23.8686	24.0329	23.2687	23.2015	NaN	24.037	23.8377
0.000134669	-0.680763	Q6P9V1;Q62745	Tetraspanin;CD81 antigen	Cd81	4	25.904	1712900000	206	24.4684	24.2313	24.0414	25.5396	25.5754	25.6456	24.6716	24.8457	24.6269	24.0544	24.3047	24.0873	24.2689	24.2726	24.4018	25.5852	25.9408	26.1473	24.5732	24.6362	24.5163	24.5713	24.6324	24.6673	23.7605	24.0529	23.9853	25.566	25.2009	25.3269	24.2275	24.4108	24.179	24.574	24.5241	24.4762	23.3127	23.6721	23.3847	24.6632	24.8244
1.58442e-05	-0.64933	Q6AXS3	Protein DEK	Dek	5	42.892	1788500000	80	24.3463	23.8356	24.3816	25.2594	24.8452	25.1181	24.8916	24.6302	24.9999	24.7493	25.0224	24.7702	24.6826	24.6009	24.5121	NaN	24.3852	NaN	24.9208	24.993	24.8473	24.0061	24.4349	23.8047	24.2656	24.4679	24.2368	24.2596	24.1416	24.7173	25.0944	25.2414	25.102	24.5661	24.5141	24.6055	24.3314	24.0349	24.3697	24.6677	24.4521
0.000144261	-0.640533	G3V6I9;P12749;D4A1Z2;D4AE42;D3ZSF2;M0R6L3	60S ribosomal protein L26	Rpl26;Rpl26-ps2;Rpl26-ps1	17	17.258	2321500000	93	25.206	NaN	24.8086	25.0779	25.2389	25.2965	25.6598	25.4993	25.7663	24.9797	24.9097	24.9864	24.7296	24.8501	24.6559	26.0933	25.551	25.6748	25.3646	25.4008	25.3911	24.8522	23.8416	NaN	24.9566	24.3305	24.916	25.2249	25.0549	24.9048	25.4753	25.4424	25.5613	25.2276	23.7597	NaN	25.8496	25.5644	25.42	25.7139	25.2792
0.000652511	-0.61073	Q6AXR5	UDP-N-acetylglucosamine transporter	Slc35a3	3	36.078	1309400000	50	23.8589	23.8216	23.7941	24.6388	24.4888	24.5827	24.6543	24.6899	24.8524	23.7146	23.586	23.6728	24.2168	24.2497	24.2993	NaN	NaN	NaN	25.1922	24.9895	24.861	24.305	24.3877	24.386	23.6074	23.6186	23.775	24.5658	24.1689	24.3464	24.607	24.8297	24.764	24.1888	23.8968	23.7107	24.266	24.2309	24.0359	24.3713	24.3673
0.000647758	-0.596324	F1LPG5;F1M7T1;D3ZQH7;F1M7Z4;D3ZV29		LOC688963;LOC100361934	5	15.064	905810000	28	23.2791	23.4962	23.4677	24.2486	24.1871	24.7981	23.6401	23.4611	23.6757	23.8827	23.6254	23.8037	23.416	23.4532	23.3454	NaN	24.5567	NaN	24.0045	24.37	24.4801	24.8613	24.7367	24.7542	23.1446	23.3066	23.4621	23.8846	23.65	23.8435	24.235	24.6422	24.2594	23.7832	23.6494	NaN	23.3778	23.191	23.3177	NaN	23.6186
0.0235516	-0.595225	Q6TUD4	Protein YIPF3	Yipf3	3	37.973	211160000	15	22.1017	22.0357	21.8921	22.6167	22.5269	NaN	22.5309	NaN	NaN	NaN	NaN	NaN	NaN	22.2036	NaN	NaN	NaN	NaN	22.3317	NaN	NaN	NaN	22.1806	NaN	NaN	NaN	NaN	NaN	NaN	NaN	23.1914	NaN	22.56	NaN	NaN	22.0095	NaN	NaN	NaN	NaN	NaN
0.00880115	-0.569432	D4A1R8		Cpne1	6	58.843	447260000	32	22.5702	22.3108	NaN	23.6778	23.5958	23.9487	23.4658	23.6755	23.8224	22.723	22.6318	22.6593	22.2648	22.215	22.3191	NaN	NaN	NaN	22.5053	22.608	NaN	23.4282	23.1389	23.7656	NaN	NaN	NaN	22.6803	23.5086	22.8438	NaN	22.6441	NaN	22.6162	23.1563	22.5369	NaN	22.3295	22.3846	22.9573	22.7287
0.0267817	-0.559623	D4A3X0;Q7TP06		Seh1l;LOC307347	2	260.99	79801000	51	NaN	NaN	NaN	NaN	NaN	NaN	NaN	NaN	NaN	NaN	NaN	NaN	21.6018	21.5177	NaN	NaN	NaN	NaN	NaN	NaN	22.0359	NaN	NaN	NaN	NaN	NaN	NaN	NaN	NaN	NaN	NaN	NaN	NaN	NaN	NaN	NaN	NaN	NaN	NaN	NaN	NaN
0.00374953	-0.54426	P62902;D3ZX87;D4ABZ9;D3ZKU5;D3ZVY6;D3ZK34;A0A0G2K7E3;D3Z8W1;D4ACQ2;D3ZU04;D4A172;D3ZZ60;D3ZVF5;D3ZLA5;D3ZDE9;F1LVW2;A0A0G2JWD9;D3ZAC7	60S ribosomal protein L31	Rpl31;LOC100910017;Rpl31l4;RGD1564839;LOC100359986;RGD1565894;LOC680384;LOC690384;LOC102550734	6	14.463	2430600000	120	24.7574	24.865	24.9607	24.409	24.5787	24.6796	25.636	25.6297	25.557	24.7738	24.9066	24.6332	24.444	24.4491	24.4147	25.8446	25.5352	24.6595	24.506	24.584	24.5163	25.1867	25.268	25.2773	24.7163	24.5757	24.9903	25.1023	24.8651	25.0522	24.994	25.5821	25.5803	24.9373	24.9674	25.0144	25.5196	25.2187	25.2771	25.3255	25.4082
0.000389425	-0.523702	B2RYW3		Ndufb9	8	21.892	897910000	186	23.3889	23.3756	23.5032	24.5953	24.6941	24.6565	23.8351	23.6145	23.8828	23.9456	23.8044	24.0382	23.351	23.4262	23.1568	24.467	24.7226	24.53	23.9452	23.8338	24.1328	24.2821	24.3666	24.3357	22.8647	23.0781	23.3851	24.4625	24.423	24.5145	24.2696	23.9711	24.1686	23.6788	23.8243	23.8617	23.2701	NaN	23.2256	23.8917	24.1162
1.04723e-08	-0.522831	D4A400		Lpo	23	78.247	5165300000	435	25.9533	26.0204	26.025	26.792	26.9077	26.9369	26.3913	26.5158	26.5434	26.3926	26.4522	26.3739	25.9963	26.0356	26.0146	26.667	26.9349	26.9198	26.6716	26.6444	26.7788	25.9972	26.0998	26.0785	25.7155	25.69	25.5838	26.2454	26.1356	26.3219	26.2533	26.4711	26.3787	25.9177	26.0859	26.0849	25.9695	25.8405	25.9638	25.9731	26.0336
0.000117927	-0.521517	F1LZW6		Slc25a13	4	54.099	401290000	40	22.1217	22.216	22.4788	22.9976	22.9842	22.9347	22.7639	22.3808	22.9925	NaN	22.157	22.2801	22.0319	22.0575	22.0909	NaN	NaN	NaN	NaN	22.8371	NaN	22.8953	22.8911	22.8552	NaN	22.2016	NaN	22.8008	NaN	22.8442	22.9389	22.8905	22.6594	22.4233	NaN	22.9471	NaN	NaN	22.6486	22.5889	NaN
1.18028e-05	-0.474432	D3ZKE6;A0A0G2JWA5;B5DF63;P0C219	Sarcolemmal membrane-associated protein	Slmap	29	90.559	7606100000	601	26.1124	25.9869	25.9183	27.2675	27.3551	27.2198	26.5355	26.6742	26.5619	26.5592	26.5962	26.4889	26.1578	26.1349	26.2822	26.6553	26.4591	26.2138	26.7967	26.8636	26.7415	26.5527	26.5073	26.6385	26.6867	26.6231	26.5047	26.9451	27.0684	27.069	26.4072	26.4017	26.467	26.9515	27.0105	26.9605	26.3206	26.2247	26.2157	26.9312	26.9661
0.00361918	-0.46275	A0A0G2K7W6;P18445;D4AAY6;D3ZI60;D3ZG03;D3ZF07	60S ribosomal protein L27a	Rpl27a;RGD1559972;RGD1561984	6	16.587	4704700000	216	25.4347	25.4385	25.4953	26.1635	26.1279	25.954	26.3812	26.4334	26.3896	25.307	25.4354	25.3218	25.5033	25.511	25.5331	26.1357	25.921	26.1011	26.5402	26.3779	26.4137	26.104	26.1083	26.3221	25.7993	26.0725	25.9948	26.1953	26.2117	26.0905	26.0265	26.299	26.4304	26.1437	25.9318	25.9686	26.5686	26.5131	26.4915	26.6693	26.5506
1.7706e-06	-0.450284	B2RYM3		Itih1	9	100.59	671620000	81	NaN	23.1308	23.1932	23.1585	NaN	NaN	23.85	23.5592	23.6371	NaN	23.4852	NaN	23.1818	23.1371	23.4672	NaN	NaN	NaN	23.4512	NaN	23.4819	23.4416	NaN	NaN	23.1845	23.0777	23.5008	NaN	23.774	23.6842	NaN	NaN	NaN	NaN	NaN	NaN	NaN	23.2728	NaN	23.4859	23.3429
0.00677502	-0.445495	P61023	Calcineurin B homologous protein 1	Chp1	8	22.432	700290000	108	23.1064	22.9082	23.2297	23.7351	24.3527	23.9605	23.5954	23.6779	23.7868	23.714	24.3229	23.678	23.4261	23.1408	23.1292	NaN	NaN	NaN	23.6328	23.5656	23.6556	23.1472	23.3207	23.2971	22.8367	22.6797	22.5509	23.4788	23.6608	23.3427	24.2084	24.23	23.8095	23.4691	23.594	23.1408	22.8573	23.0817	23.3861	23.274	23.4012
0.010731	-0.439798	O54821;P35525;O54822;E9PU32;O54823	Chloride channel protein;Chloride channel protein 2	ClC-2;Clcn2	4	99.313	86860000	30	NaN	NaN	NaN	NaN	NaN	NaN	NaN	NaN	NaN	NaN	NaN	NaN	NaN	NaN	NaN	NaN	22.7369	NaN	22.1259	NaN	21.993	NaN	NaN	NaN	NaN	NaN	NaN	NaN	NaN	NaN	NaN	22.2536	22.1113	NaN	NaN	21.6992	NaN	NaN	NaN	NaN	NaN
0.00127655	-0.435678	A0A0G2K4U2			7	25.661	1613300000	131	24.291	24.1391	24.1017	24.9885	24.9475	24.865	24.3359	24.376	24.4614	24.2317	24.1541	24.4963	24.4472	24.4938	24.6481	24.7235	25.156	25.2282	25.4574	24.4147	25.1546	24.5069	24.6439	24.5201	23.9157	23.7259	24.2291	24.7917	24.5787	24.6372	23.9457	24.3026	25.02	24.071	23.8731	23.8122	24.3236	24.5997	24.1605	24.6967	24.6003
0.00181705	-0.435429	D3ZH41		Ckap4	14	36.315	2585800000	307	25.5226	25.2002	25.3363	25.6596	25.5916	25.6232	25.4909	25.45	25.3668	24.3198	24.5436	24.58	25.2681	25.3392	25.1307	NaN	NaN	NaN	25.9865	25.8868	25.897	25.2952	25.3752	25.3635	24.3823	24.4929	24.5523	25.4764	25.6359	25.512	25.7216	25.7751	25.5726	25.0908	25.0597	25.1325	25.0038	24.7125	25.1869	25.1605	25.2147
0.000368749	-0.432364	Q6AXN2;O35568	EGF-containing fibulin-like extracellular matrix protein 1	Efemp1	10	54.654	891730000	98	23.7659	23.6286	23.7599	23.7633	NaN	NaN	23.9004	23.9814	23.7762	23.2238	23.4278	23.2791	23.6076	23.5321	23.6067	NaN	NaN	NaN	23.5031	23.4301	NaN	NaN	23.5506	23.2797	23.4939	23.3619	23.4546	24.1026	NaN	23.8261	NaN	NaN	23.8492	23.7438	23.4786	23.6215	23.576	23.6205	23.2191	23.4091	23.7671
2.21809e-05	-0.423607	D3ZEV8;A0A0G2K0Q8;B5DEX6;A0A0G2K518		Susd2	4	89.67	249890000	41	21.8622	NaN	22.1298	22.0644	22.2924	22.469	22.5651	22.7059	22.355	NaN	NaN	NaN	22.0933	22.2555	21.7952	NaN	NaN	NaN	22.5625	NaN	NaN	NaN	NaN	NaN	22.1253	22.0135	22.1717	22.3978	22.4578	NaN	NaN	NaN	NaN	NaN	21.8862	NaN	21.849	NaN	NaN	22.3992	NaN
0.000956152	-0.423081	D3ZFH5;Q498S9;CON__Q9TRI1		Itih2	7	92.368	607500000	60	NaN	23.2247	23.8535	NaN	NaN	NaN	23.8856	23.9665	23.9975	NaN	24.1688	NaN	23.4094	23.856	23.3016	NaN	NaN	NaN	NaN	NaN	23.7972	NaN	NaN	NaN	23.8005	NaN	23.3116	NaN	NaN	NaN	NaN	NaN	NaN	23.2452	NaN	NaN	23.7805	23.5834	23.498	NaN	NaN
0.00368054	-0.409636	P18614	Integrin alpha-1	Itga1	14	130.81	1308300000	162	23.7959	23.8522	23.4565	24.0597	24.0772	24.2803	24.3334	24.2037	24.2442	23.3727	23.421	23.4378	23.7707	23.852	23.7766	23.963	24.3188	24.172	23.9494	24.291	24.0946	24.1334	23.918	24.279	24.4661	24.4647	24.6515	24.0239	23.8847	24.1114	24.1131	24.1427	23.5652	23.6093	24.2539	24.2504	23.4843	23.494	23.4378	24.0787	24.3638
0.000721646	-0.405161	A0A0G2K896;Q6QI47;Q7TP83;E9PST1;Q6TUG7;CON__Q2HJF0		RGD1310507	10	76.721	608950000	110	23.2643	23.0244	23.346	22.4251	NaN	23.2085	NaN	23.4357	23.1718	23.0499	23.246	23.0535	NaN	22.6895	22.9986	NaN	NaN	NaN	NaN	NaN	NaN	22.9308	22.8513	22.8029	23.2109	23.2631	23.2341	23.9086	23.6034	23.527	NaN	NaN	NaN	NaN	22.4349	23.084	22.9154	NaN	22.8536	23.2099	23.6249
0.00253571	-0.405049	Q6AXR4;F1LR87	Beta-hexosaminidase subunit beta	Hexb	21	61.527	5627400000	427	25.991	26.1299	25.8247	26.7008	26.8008	26.6798	26.2066	26.2941	26.1854	26.6477	26.4658	26.5533	26.0293	25.9561	25.9174	27.236	27.1833	26.3284	26.5033	26.4774	26.5341	25.8968	26.0467	25.9609	26.0433	25.8611	26.113	26.2187	26.3399	26.2153	26.0072	26.3759	26.4526	26.295	26.3054	26.3102	26.499	26.1175	26.4126	26.1549	26.1383
0.000950762	-0.396957	Q9QZQ5	Protein NOV homolog	Nov	11	38.509	1536100000	183	24.0449	23.8813	23.8276	24.653	24.6158	24.6013	24.4106	24.5665	24.6824	24.6972	24.7561	24.628	24.6027	24.3117	24.0695	25.9724	25.8327	24.5761	24.9073	24.2635	24.1929	23.841	24.1242	23.8661	24.2735	23.9388	24.156	24.6178	24.6819	24.779	24.4851	24.8325	24.219	24.3066	24.0103	24.1828	24.5291	24.4906	24.552	23.9294	23.7067
0.00476994	-0.396914	P07379	Phosphoenolpyruvate carboxykinase, cytosolic [GTP]	Pck1	20	69.415	3043000000	212	25.0651	24.9538	25.2394	25.6026	25.7244	25.6292	25.2903	25.3973	25.2607	25.5732	25.4946	25.6206	25.1246	24.9105	25.051	25.6515	25.0014	24.7572	26.1704	26.103	26.0796	25.2477	25.3884	25.0609	25.1286	25.3937	25.3968	25.5723	25.4665	25.2363	25.877	26.0553	25.9679	25.1339	24.877	25.17	25.1289	25.0621	25.1462	25.0752	24.6153
1.21262e-05	-0.392286	P54313;Q45QL6;Q91XL4	Guanine nucleotide-binding protein G(I)/G(S)/G(T) subunit beta-2	Gnb2	11	37.331	4891700000	415	26.3185	26.272	26.3046	26.3359	26.5318	26.6802	26.3988	26.4437	26.5224	25.7902	25.925	25.9156	25.9692	25.9838	25.8585	26.2948	26.4146	25.8647	26.3369	26.3906	26.2831	26.0884	26.0477	25.9719	25.5204	25.7929	25.5922	26.4506	26.3108	26.3189	26.5617	26.5004	26.5535	25.8106	25.9498	25.8404	26.126	26.0037	25.8826	26.0805	26.0254
0.000804223	-0.390272	A0A0G2KB55;P63281	SUMO-conjugating enzyme UBC9	Ube2i	3	17.347	1094700000	102	23.5589	23.6538	23.4758	24.2795	24.2037	24.1041	23.7425	24.0072	24.2921	23.9285	23.9162	24.1483	23.7974	23.8417	23.8055	24.8412	24.3283	24.2953	24.478	24.5206	24.5953	23.9019	23.7482	23.7689	24.0257	24.2186	23.9511	23.7073	23.6527	23.7827	24.0675	24.1771	24.17	23.673	23.7681	24.0774	23.9237	24.0175	24.0419	24.235	24.1854
0.00545146	-0.386585	Q7TSU1	Brefeldin A-inhibited guanine nucleotide-exchange protein 2	Arfgef2	4	201.97	6101200000	22	26.3913	26.4601	26.3967	NaN	NaN	NaN	26.444	26.1904	26.5635	26.5786	26.6775	26.568	26.3191	26.4529	26.4048	NaN	NaN	NaN	NaN	NaN	NaN	26.4529	26.6115	26.5682	26.0594	26.2128	26.0916	27.5217	27.6586	NaN	27.0381	NaN	26.6057	26.6538	26.8257	26.7688	25.7881	25.8268	25.6988	26.6078	26.8072
0.000195011	-0.382673	Q05BA4;Q6VBQ5	Myeloid-associated differentiation marker	Myadm	3	35.118	850010000	117	23.379	23.712	23.9108	23.9767	24.2268	24.1635	23.838	24.1283	23.9455	NaN	23.2867	23.417	23.7095	23.7035	23.2855	NaN	NaN	NaN	NaN	23.9199	23.5893	23.6171	NaN	23.7207	NaN	23.6513	23.3526	24.0012	23.9844	23.8001	23.4981	23.7629	23.5455	23.7476	23.8673	23.5915	23.0094	NaN	23.1335	23.937	23.4595
0.0024161	-0.380053	A0A0A0MXW1;B0BNK6;P35738	2-oxoisovalerate dehydrogenase subunit beta, mitochondrial	Bckdhb	5	42.96	813740000	120	23.2231	23.1035	23.0099	23.8129	23.8311	23.5693	23.4852	23.7107	23.859	23.3977	23.4055	23.3266	23.6387	23.3292	23.384	24.6108	24.3701	24.4368	23.8894	23.8035	23.6961	23.3239	23.7275	23.5484	23.8674	23.6834	23.541	23.6026	23.7437	23.489	23.5714	24.3035	23.4429	23.3448	23.5071	23.3762	23.0851	23.1936	23.2713	23.9125	23.9855
4.26e-05	-0.37871	Q8VHS9;Q8CFG7;A0A0G2K7E5;Q9ERS3;D3ZKP9;P54290;A0A0G2K8L7	Voltage-dependent calcium channel subunit alpha-2/delta-1;Voltage-dependent calcium channel subunit alpha-2-1;Voltage-dependent calcium channel subunit delta-1	Cacna2d1	27	122.17	3446900000	506	25.0441	25.2537	25.1854	25.8989	26.0205	25.9424	25.6753	25.7405	25.7057	24.9739	24.9742	24.9498	25.4286	25.1508	25.1938	26.7769	26.4001	26.697	25.4664	25.7346	25.7116	25.3205	25.2262	25.324	25.5468	25.6067	25.6442	25.3784	25.3493	25.4028	25.3272	25.3863	25.4624	25.5432	25.6228	25.545	25.5302	25.4621	25.5233	25.7049	25.6835
0.00209672	-0.376751	Q4QQV0		Tubb6	10	50.059	3193200000	186	25.1914	25.4664	25.382	25.3379	25.6664	25.7299	25.4714	25.3202	25.4288	25.321	25.6505	25.3786	25.2821	25.1644	25.1807	NaN	NaN	NaN	25.6276	25.4762	25.6461	25.6153	25.7179	25.5738	25.2055	24.6711	25.3571	26.1415	26.5445	26.1182	25.985	25.1766	25.4975	25.6234	25.6211	25.7909	25.1856	25.1741	25.2401	25.5572	25.4484
0.000154208	-0.370663	Q6IMZ3;P48037;D3ZXN8	Annexin;Annexin A6	Anxa6	48	75.755	16194000000	1088	27.7093	27.6645	27.697	28.7454	28.7219	28.74	27.9805	28.1006	27.9908	27.4297	27.4058	27.4927	27.2454	27.3041	27.3246	27.7622	27.6272	27.5858	27.5446	27.6292	27.6417	27.8702	27.8533	27.7803	27.3434	27.3865	27.2217	28.4037	28.3899	28.3427	27.4486	27.3912	27.4653	28.1204	28.1483	28.1585	27.1492	27.1815	27.2211	28.0343	28.1061
0.000413993	-0.369102	Q66HK3;Q63921	Prostaglandin G/H synthase 1	Ptgs1	6	69.046	1117400000	76	24.0138	23.3479	23.2265	24.977	24.6724	24.8745	23.6155	23.7422	23.9183	23.0187	22.8094	23.0038	23.0776	23.7018	23.3625	24.2685	NaN	NaN	23.813	23.9787	23.9815	23.7867	23.8496	23.6934	23.6295	23.7847	23.6832	24.2418	24.4378	23.8885	23.494	23.8814	23.9257	24.1936	24.1393	23.8723	23.3182	23.5322	23.1819	23.8594	24.1977
3.11775e-06	-0.36222	F1M2P8;F1LS98;B5DFC4;P05696;P63319	Protein kinase C;Protein kinase C alpha type	Prkca	16	72.77	2489800000	276	25.109	24.8819	24.7894	25.5054	25.2813	25.3081	25.3191	25.1949	25.5241	25.0383	25.2174	24.7462	24.8024	25.0797	24.8919	25.1851	24.9053	25.1363	25.4665	25.4261	25.2364	25.0971	24.8664	24.7141	24.7812	24.8492	24.9599	25.3559	25.4631	25.4679	25.2646	25.1726	25.044	25.2627	25.0494	25.4561	25.0937	25.2796	25.0444	25.286	25.2824
0.000230369	-0.359304	Q5BJZ3		Nnt	25	113.87	5750000000	472	25.888	26.0193	26.0232	27.0504	27.152	27.2604	26.3809	26.3244	26.3706	26.3226	26.3336	26.3722	26.004	25.8668	26.0061	27.4682	27.4259	27.41	26.4679	26.3869	26.3981	26.5063	26.4307	26.4343	25.4961	25.4946	25.3714	26.8584	26.651	26.7265	26.3078	26.2723	26.2383	26.4399	26.3568	26.3791	25.7672	25.8271	25.8055	26.3666	26.3081
0.000123673	-0.344527	D3ZZ49;A0A0G2JXJ3		Fam3d	10	24.375	11066000000	468	27.1565	27.1207	27.0982	27.7607	27.6857	27.7584	27.5352	27.5471	27.5272	27.1424	27.1603	27.1831	27.3281	27.2924	27.2817	26.8425	26.9576	27.1072	27.8903	27.9588	27.9174	27.3639	27.2401	27.39	26.9344	27.0282	27.0384	27.4455	27.3145	27.3109	27.6475	27.7144	27.6473	27.1352	27.1994	27.1325	27.2852	27.4124	27.2045	27.1103	27.143
4.18461e-05	-0.343611	Q5PPN5	Tubulin polymerization-promoting protein family member 3	Tppp3	11	18.979	5442100000	388	26.1384	25.9825	25.9743	26.4883	26.5969	26.385	26.2703	26.3278	26.2558	26.0995	26.2219	26.1339	26.0234	26.0657	26.1528	26.7838	26.9605	27.0205	26.9608	26.5507	26.8056	26.0693	26.1555	26.1399	26.0402	26.1027	26.007	26.3276	26.4571	26.4668	26.4973	26.5405	26.6527	25.8651	25.6495	25.8504	25.9927	26.0397	26.0753	26.3821	26.3399
0.00112707	-0.338229	C9WPN6;A0A1P0QU16		Eif2s3y	4	51.153	373080000	51	22.008	22.1813	22.1787	22.3625	22.4072	22.5892	22.3472	22.3523	NaN	22.3397	22.5795	22.3435	NaN	22.1472	22.1298	NaN	NaN	NaN	22.8613	22.593	22.6441	22.4821	22.0159	22.6214	22.3339	22.4009	22.5099	22.2215	22.3967	22.3444	22.0569	22.4583	22.475	22.676	22.672	22.47	22.1435	21.9924	22.2929	22.1014	22.3042
2.51653e-07	-0.338069	A0A0G2JSK5;P49134	Integrin beta-1	Itgb1	25	88.344	7571000000	657	26.4581	26.4808	26.5447	27.3984	27.3517	27.3299	26.7539	26.8113	26.8791	26.4007	26.4884	26.4583	26.441	26.4503	26.4084	27.156	26.8584	26.899	26.4153	26.8609	26.4843	26.6992	26.5694	26.5914	26.4486	26.4796	26.5411	26.859	26.9059	26.7798	26.673	26.7099	26.6814	26.7125	26.7269	26.6921	26.3484	26.377	26.3601	26.7631	26.7997
0.000409987	-0.323018	Q62969;F1LP67;A0A0G2K776	Prostacyclin synthase	Ptgis	15	57.127	2176100000	236	24.5084	24.5406	24.6254	24.974	25.2929	25.544	25.1557	25.3157	24.9587	24.6069	24.359	24.465	24.8027	24.7421	24.58	24.7844	25.7513	25.3998	24.8571	24.3913	24.9593	24.8635	24.1528	24.4651	24.751	24.525	24.5063	25.1107	25.0352	24.9887	24.4791	24.5743	24.6697	25.1037	24.8707	24.9293	24.5763	24.4828	24.6551	25.2466	25.2365
0.00049752	-0.319785	Q641X3	Beta-hexosaminidase subunit alpha	Hexa	16	60.537	2332700000	214	24.8407	25.1208	24.95	24.8932	24.9996	25.4736	24.8943	24.941	24.7702	25.1934	25.2107	25.2521	24.7473	24.5703	24.6022	25.0144	25.2462	25.2405	25.3785	25.4014	25.4075	25.0491	24.9695	24.7289	25.0403	24.8598	24.8851	24.9989	25.5776	25.1477	25.3782	25.2739	25.4607	24.802	24.8001	24.8403	25.2149	24.9785	25.047	24.9181	24.9318
0.000533226	-0.318159	P06685;P06687;Q64608;Q5PQV3;Q64541	Sodium/potassium-transporting ATPase subunit alpha-1	Atp1a1	77	113.05	70122000000	2942	29.9739	30.0032	29.9913	30.3662	30.4158	30.4416	30.2623	30.2164	30.24	30.1868	30.2215	30.1941	30.0285	30.0251	29.9586	30.2043	30.223	30.3417	30.2615	30.33	30.2876	30.0509	30.0738	30.0618	29.3916	29.2842	29.3323	29.9445	30.026	30.0165	30.2144	30.2397	30.2235	29.8763	29.8769	29.8939	29.7418	29.7441	29.6991	29.5801	29.6088
0.00109166	-0.317474	P35565	Calnexin	Canx	12	67.254	6124300000	468	26.4181	26.2435	26.4212	26.6663	26.7567	26.7286	26.4736	26.5828	26.5517	26.0386	26.028	26.1199	26.2406	26.1419	26.1366	26.6671	27.0419	26.9718	26.8113	26.8156	26.6898	26.7631	26.6734	26.8476	25.9032	25.774	25.7445	26.727	26.6823	26.6356	26.5163	26.5254	26.3163	26.5217	26.646	26.5949	26.1725	25.97	26.1699	26.8075	26.8159
0.000187864	-0.315738	D4A1J6		Ankfy1	10	128.66	1765500000	206	24.4862	24.3515	24.3875	25.4679	25.0044	24.9686	24.5342	24.6694	24.6383	24.2588	24.2204	24.5122	24.3726	24.4663	24.4676	25.9597	25.7401	25.5776	24.995	24.928	24.9249	24.336	24.282	24.4262	24.4418	24.591	24.3392	24.7244	24.5272	24.1637	24.7714	24.4712	24.5284	24.3045	24.3489	24.4203	24.4769	24.4482	24.3166	24.5552	24.7037
6.81649e-05	-0.310143	Q6MGC4		Pfdn6	8	14.497	1823800000	23	24.4435	24.5609	24.4638	24.6651	24.6983	24.9279	24.9046	24.6981	25.0053	25.3869	24.8499	25.4044	24.6372	24.708	24.7419	NaN	NaN	NaN	25.0231	25.0467	24.9009	24.5966	24.6267	24.4536	24.5185	24.5374	24.258	23.7331	NaN	NaN	24.8178	24.9039	24.8603	24.8307	25.0086	24.8684	24.8132	24.9759	24.9284	24.711	24.7045
7.27024e-05	-0.302235	P85108	Tubulin beta-2A chain	Tubb2a	12	49.906	10506000000	632	27.3049	27.2844	27.1621	27.6433	27.7019	27.6517	27.3202	27.2081	27.2856	27.1683	27.2359	27.1902	27.2126	27.432	27.1704	26.7221	26.7799	26.9165	27.6019	27.5159	27.3977	27.1349	26.9987	27.129	27.0214	26.9936	26.9694	27.5659	27.6366	27.6855	27.3283	27.4829	27.4814	27.1171	27.1554	27.1117	27.0557	27.0082	26.9002	27.4182	27.4662
0.000355894	-0.299423	A0A0G2JVH4;A0A140TAG5;Q3KR86	MICOS complex subunit Mic60	Immt	32	86.229	7577700000	744	26.6294	26.6713	26.7341	27.0139	26.9593	26.9964	26.9781	27.013	27.057	26.5876	26.5956	26.6615	26.5199	26.599	26.5876	26.8755	26.7354	26.5159	27.0537	27.0912	27.2272	26.7971	26.7848	26.8912	26.483	26.3393	26.3841	26.6659	26.727	26.7212	26.9999	27.0099	26.9306	26.7095	26.8299	26.756	26.429	26.4124	26.4337	26.5538	26.6225
2.83026e-05	-0.297244	O55159	Epithelial cell adhesion molecule	Epcam	21	35.207	14330000000	636	27.3371	27.4334	27.4946	27.8233	27.8948	27.8032	27.8368	27.8791	27.8706	27.9376	28.0061	27.9535	27.7052	27.693	27.6872	28.0499	28.1903	28.2238	27.6529	27.9519	27.7942	27.4701	27.4543	27.4073	27.2275	27.1143	27.2752	27.9739	27.8608	27.9132	27.7118	27.667	27.7478	27.5948	27.6156	27.5354	27.5178	27.5374	27.7684	27.2677	27.2454
1.23639e-05	-0.286899	Q5BJN1;A0A0G2KB11		Stard10	14	32.904	5134900000	226	25.9084	25.9673	26.0176	26.1207	26.2366	26.1057	26.2398	26.4666	26.4231	26.0807	26.0396	25.9011	26.0938	26.2852	25.9436	26.714	26.9045	26.083	26.4629	26.5366	26.2846	25.8856	25.6081	25.5767	26.0646	25.9438	25.9117	26.5304	26.341	26.3557	26.3816	26.2308	26.457	26.0867	26.0056	25.9769	25.9698	25.894	26.1652	26.4473	26.0751
7.87591e-05	-0.283496	P08009	Glutathione S-transferase Yb-3	Gstm3	5	25.68	2375300000	244	25.0742	24.9072	25.0876	25.5305	25.4919	25.4605	25.1401	25.2282	25.1674	24.9431	25.1135	24.968	25.1067	24.9978	25.0153	23.749	23.6183	23.6529	25.5598	25.3973	25.6691	24.7696	24.9142	24.7577	24.9411	24.8941	24.9627	25.0457	25.1782	25.4468	25.2667	25.2535	25.1644	24.7748	24.7779	24.8597	25.0586	24.8176	24.7034	25.0937	25.1544
3.26264e-07	-0.278471	Q62952	Dihydropyrimidinase-related protein 3	Dpysl3	29	61.967	13464000000	985	27.4802	27.4099	27.2587	27.8394	27.8744	27.9146	27.6767	27.6072	27.6235	27.32	27.3639	27.3049	27.3874	27.3256	27.3746	28.1406	27.9397	28.0632	27.7155	27.6926	27.6827	27.4217	27.3664	27.4681	27.4384	27.3789	27.3465	27.7526	27.6976	27.6212	27.4644	27.3749	27.4348	27.3351	27.3719	27.3768	27.3704	27.35	27.4023	27.7212	27.667
1.22989e-05	-0.274063	P60711;A0A0G2K3K2;A1Z0K8;Q99NC6	Actin, cytoplasmic 1;Actin, cytoplasmic 1, N-terminally processed	Actb	32	41.736	1124100000000	3839	34.0141	33.9257	33.9311	33.835	33.9423	33.9743	33.9802	33.9998	33.9697	33.9075	33.8608	33.9189	33.9585	34.0533	34.0409	33.8642	33.7316	33.6832	34.1703	34.1662	34.107	33.7826	33.7874	33.8115	33.7472	33.7671	33.7015	34.2184	34.2481	34.1566	34.1656	34.2621	34.1882	33.9234	34.006	34.0124	33.7047	33.64	33.6124	34.0298	34.0045
4.4815e-06	-0.248219	B0BNE5	S-formylglutathione hydrolase	Esd	18	31.363	12634000000	753	27.1773	27.1882	27.2808	27.4648	27.5354	27.3677	27.3574	27.4901	27.5912	27.5283	27.4672	27.5054	27.3019	27.2575	27.2068	28.1667	27.9552	27.9308	27.534	27.641	27.6795	27.2075	27.2739	27.2578	27.5148	27.4943	27.4249	27.6365	27.452	27.4208	27.5678	27.5126	27.4985	27.3501	27.3805	27.272	27.3476	27.3901	27.2618	27.7133	27.6018
3.07432e-08	-0.242396	P16617;M0R6Y8;Q5XIV1;A0A096MJL6	Phosphoglycerate kinase 1	Pgk1	48	44.538	84970000000	1959	30.0303	30.0803	30.1167	30.3561	30.2671	30.3536	30.3272	30.2937	30.3375	30.2584	30.1921	30.2568	30.2132	30.1904	30.1084	30.1069	30.2137	30.2226	30.5427	30.566	30.5711	29.9383	29.9005	29.9208	30.1676	30.1535	30.0873	30.3315	30.27	30.3239	30.4412	30.4114	30.4261	30.1744	30.2293	30.2805	30.3321	30.2639	30.2408	30.25	30.2278
2.48036e-07	-0.239304	Q9Z1B2	Glutathione S-transferase Mu 5	Gstm5	13	26.629	3615300000	305	25.648	25.5602	25.6175	25.8362	25.9552	25.7755	25.8227	25.7418	25.6166	25.6	25.6503	25.547	25.5412	25.6669	25.4477	NaN	NaN	NaN	25.6839	25.7556	25.8645	25.3051	25.4158	25.341	25.565	25.4708	25.4173	25.8808	25.8149	25.8444	25.905	25.6857	25.7421	25.3028	25.4881	25.4698	25.5552	25.445	25.641	25.5991	25.6316
4.80716e-08	0.251274	Q3ZAV2;P62961;Q76MJ6;D3ZEV0;D4A3P0	Nuclease-sensitive element-binding protein 1	Ybx1;LOC100912427	17	36.2	7785400000	657	26.7027	26.7799	26.7612	26.8453	26.8039	26.9459	26.5368	26.6103	26.5207	27.1357	27.1642	27.2523	26.8653	26.8746	26.8653	26.6749	26.5326	26.5786	26.3184	26.2902	26.3757	27.1487	27.203	27.1137	26.8147	26.6937	26.7596	26.5138	26.4822	26.3779	26.5278	26.6139	26.6471	26.828	26.8446	26.8772	26.771	26.6432	26.7703	26.7163	26.6808
1.56477e-05	0.265494	Q5FVM4	Non-POU domain-containing octamer-binding protein	Nono	28	54.925	6357500000	846	26.4139	26.3813	26.522	26.5156	26.3089	26.6327	26.2264	26.243	26.0819	26.5128	26.4161	26.5848	26.3917	26.6139	26.4983	25.6803	26.5858	26.7347	26.1988	26.0826	26.2772	26.6543	26.5393	26.5797	26.3228	26.2354	26.2068	26.2995	26.2328	26.2592	26.3368	26.1667	26.3777	26.5249	26.5361	26.4028	26.4797	26.4436	26.5335	26.4609	26.6632
9.91212e-05	0.280947	B2GV73	Actin-related protein 2/3 complex subunit 3	Arpc3	15	20.535	7453400000	390	26.8795	26.7951	27.0491	26.282	26.405	26.313	26.5183	26.4914	26.467	26.7054	26.7442	26.6099	26.8791	26.8283	26.8035	25.7903	26.6656	25.8807	26.5512	25.9461	26.3728	26.6734	26.6803	26.6816	26.8817	27.0132	26.8474	26.2911	26.5133	26.7618	26.5696	26.7474	26.6327	26.7936	26.6483	26.6444	26.7914	26.7365	26.6855	26.3436	26.4538
0.000230072	0.299699	G3V9A3;Q5EBB0;Q68FS0		Sfn;LOC298795	10	27.747	7585400000	350	26.8538	26.8433	26.8458	25.9357	26.0426	26.1168	26.6182	26.5995	26.6827	27.2	27.1785	27.0919	26.9708	27.0423	26.8726	25.3956	25.5658	25.4486	26.0895	26.0798	26.187	26.4842	26.4658	26.565	26.8778	26.8223	26.7948	25.9649	25.97	25.9849	26.816	26.7712	26.7488	26.5467	26.6105	26.5774	27.0459	27.0154	26.8411	26.2927	26.2316
0.000141135	0.315046	P04905;Q6LDP3;G3V983;B6DYQ1;Q7M0F1	Glutathione S-transferase Mu 1	Gstm1	12	25.914	3439300000	253	25.7657	25.5562	25.7364	25.5145	25.5737	25.5179	25.6569	25.776	25.7543	25.9094	25.9437	25.951	25.6	25.7482	25.4816	25.2825	25.0133	25.092	25.5008	25.3124	25.3589	24.9544	24.9146	25.0505	25.8865	25.8387	25.8219	26.0542	26.0082	26.1325	25.1725	25.0411	25.107	25.5581	25.4948	25.4394	25.7452	25.7412	25.6429	25.9369	25.7705
0.000309846	0.315778	Q91V33;Q920F3	KH domain-containing, RNA-binding, signal transduction-associated protein 1	Khdrbs1	9	48.315	1569200000	221	24.4586	24.4153	24.5293	23.8049	23.9111	23.9422	24.1083	24.3106	23.9809	24.4455	24.8228	24.5227	24.6714	24.6446	24.669	25.4987	25.7494	25.9189	24.0161	24.0068	24.1116	24.0474	24.0872	24.1584	24.5005	24.6366	24.5434	23.1267	23.3676	24.1679	24.7596	24.493	24.6206	24.4331	24.5235	24.5818	24.8387	24.8938	24.957	23.6889	23.0452
0.000355408	0.318093	F1LPS8;P86252	Transcriptional activator protein Pur-alpha	Pura	14	31.903	3608400000	299	25.5405	25.6318	25.7039	25.8978	26.1255	25.8371	25.5211	25.5248	25.6191	25.3396	25.3935	25.4764	25.7925	25.876	25.7039	26.2005	26.3318	26.2187	25.2024	25.1895	25.5034	25.4499	25.503	25.4552	26.0649	25.8797	25.8523	25.7601	25.7569	25.688	25.0582	25.1175	25.1999	25.3005	25.5212	25.3972	25.6592	25.7243	25.8455	25.7678	25.679
0.000334927	0.319489	B0BNA5	Coactosin-like protein	Cotl1	16	15.932	8207100000	530	27.0801	27.079	27.1563	26.6796	26.7159	26.5542	26.6978	26.757	26.7693	26.7982	26.8965	26.92	26.9902	26.9834	27.0543	25.8336	25.8331	26.2582	26.2394	26.2506	26.23	26.7595	26.6784	26.6041	27.1635	27.126	27.0861	27.1972	27.09	27.1069	26.84	26.7614	26.5892	26.9898	27.0274	27.0149	27.0215	27.0272	27.0845	26.3786	26.3138
5.42853e-05	0.351087	Q6P6G9;Q5I0M7;P04256;D4ACJ7;F1M2S4	Heterogeneous nuclear ribonucleoprotein A1;Heterogeneous nuclear ribonucleoprotein A1, N-terminally processed	Hnrnpa1;Hnrpa1	18	33.619	5972200000	569	26.3076	26.377	26.3463	25.2787	25.6691	25.5092	25.8906	26.0555	25.8679	26.3828	26.3886	26.4202	26.5742	26.5856	26.5407	27.71	27.3546	27.4209	25.5575	26.0032	25.8789	26.1896	26.3251	26.2666	26.5136	26.6335	26.5818	26.0841	25.9215	25.7953	26.2368	26.2668	26.1645	26.3902	26.3732	26.5315	26.3952	26.3819	26.4862	26.0951	26.1918
0.000403289	0.355516	Q7TPJ6;B4F759;P83871	PHD finger-like domain-containing protein 5A	Phf5a	5	11.488	989770000	140	23.8187	23.8243	23.7352	23.0946	22.7389	22.9781	24.0315	23.6898	23.7335	23.978	24.0049	23.9549	23.7074	23.6758	24.0326	23.6667	24.5716	23.5623	23.4746	23.585	23.6882	23.7826	23.7906	23.9118	23.8324	23.7706	23.8173	22.9861	23.218	23.4656	23.4794	23.4447	23.3054	23.7826	23.7619	23.7169	23.9843	24.2361	23.9678	23.5283	23.5267
0.00104506	0.360486	D3ZWR1		Nt5c	3	22.939	452840000	64	NaN	NaN	NaN	23.9897	23.7739	23.8532	22.7984	NaN	22.8	NaN	NaN	NaN	23.1999	23.1546	23.1245	NaN	NaN	NaN	NaN	NaN	NaN	23.4189	23.0352	23.4772	NaN	NaN	NaN	NaN	NaN	NaN	NaN	NaN	NaN	22.3743	NaN	22.5654	NaN	NaN	NaN	23.1969	23.1238
0.000195996	0.360962	A0A0G2JUX5;Q68A21	Transcriptional activator protein Pur-beta	Purb	10	33.532	2701700000	245	25.5605	25.5541	25.3309	23.2932	23.4229	23.5713	24.7776	25.0449	24.8986	25.2666	25.1717	25.126	25.5527	25.5397	25.5893	26.2367	26.2093	26.175	24.755	24.7446	24.8354	25.3695	24.9982	25.0502	25.3853	25.6931	25.645	24.5521	24.3397	24.2341	25.332	25.504	25.2583	25.1715	25.2497	25.0372	25.475	25.4049	25.6637	24.785	24.6397
0.000123673	0.373728	G3V9N1;Q562B5	Serine/threonine-protein phosphatase PGAM5, mitochondrial	Pgam5	5	32	244750000	36	21.9114	21.988	21.9612	NaN	NaN	NaN	21.7446	21.7176	21.6886	22.0135	22.277	22.2655	21.8834	21.8361	21.9123	NaN	NaN	NaN	21.0328	20.906	21.3939	NaN	21.8584	NaN	22.0816	21.9163	21.9717	NaN	20.6429	NaN	21.6546	21.8737	21.5976	21.9069	21.9279	22.0503	21.9886	21.9409	22.1397	21.0106	21.0607
0.000923211	0.376668	D3Z7Y6;A0A0G2JTR0		Krt20	2	49.098	7146000000	123	26.3388	26.3683	26.4632	25.5437	25.5735	25.7961	26.1838	26.3011	26.3179	27.1512	27.0321	27.2447	26.9027	26.7745	26.8461	27.2732	27.1198	27.3081	26.6776	26.6648	26.68	26.9813	26.9573	26.9216	26.8819	27.1124	26.9423	25.6178	25.7546	25.7582	26.849	26.812	26.7174	26.8615	26.8424	27.0823	26.6769	26.5532	26.6164	26.1015	26.2927
0.000707729	0.381844	M0R9L0;B2RYX0		Naca	5	220.19	3936900000	188	25.9694	25.8531	25.8671	26.1491	26.2793	26.4022	25.7863	25.8303	25.6905	25.9898	25.8467	26.0746	25.845	25.8985	25.8488	NaN	NaN	NaN	25.2359	25.6892	25.281	26.3113	26.1744	26.1047	26.0202	25.6508	25.94	25.8404	26.1552	26.1439	25.0182	25.0515	24.9846	25.6312	25.7667	25.7033	25.6207	25.4793	25.8491	26.1873	26.2316
0.00203809	0.382368	Q5XI55	Peptide-N(4)-(N-acetyl-beta-glucosaminyl)asparagine amidase	Ngly1	3	74.676	137800000	53	NaN	NaN	NaN	20.4445	NaN	NaN	21.1669	20.9878	20.6912	21.3053	21.0152	21.2806	21.6019	21.2571	NaN	NaN	NaN	NaN	NaN	NaN	NaN	21.1376	21.0663	21.0521	21.5648	21.5093	21.2486	NaN	NaN	20.3688	NaN	NaN	NaN	21.2286	NaN	21.1443	21.4019	NaN	21.322	NaN	NaN
0.00143791	0.383656	Q91ZN1	Coronin-1A	Coro1a	22	51.065	9168000000	652	27.19	27.1789	27.1855	26.7108	26.4851	26.6029	26.7811	26.7997	26.6816	26.9784	27.0283	27.0232	27.3729	27.3057	27.459	26.6209	25.9819	26.0452	26.7255	26.552	26.7353	27.1782	27.169	27.2095	27.6761	27.723	27.7633	26.5511	26.8127	26.9248	26.7406	26.661	26.807	27.3765	27.3076	27.2375	26.9716	26.9106	26.9423	26.768	26.8186
0.000747755	0.390189	Q4KMA2	UV excision repair protein RAD23 homolog B	Rad23b	12	43.496	4093000000	293	25.973	25.9039	25.9505	25.9902	25.9845	26.1932	25.6717	25.7135	25.8194	25.9518	25.8207	25.9205	25.8677	25.8806	25.8962	NaN	NaN	NaN	25.0201	25.1236	25.0201	25.6274	25.6942	25.7212	26.1559	26.005	26.0267	25.7408	25.7009	25.6083	25.5353	25.2292	25.3534	25.8219	25.687	25.8071	25.9208	26.0461	25.8278	25.6029	26.0343
0.00146308	0.390494	D3ZM21		Comtd1	3	28.987	661850000	117	23.2189	23.2831	23.2313	23.0477	22.924	23.0933	23.1654	23.3261	23.3801	23.6968	23.6744	23.6859	23.5022	23.6325	23.6254	NaN	NaN	NaN	22.6096	23.0212	22.9394	23.3269	23.4173	23.2777	23.1845	23.1194	23.2066	23.1949	23.8285	23.4499	NaN	23.3589	23.1521	23.3101	23.0843	23.1539	23.2126	23.062	23.0599	23.2077	23.3689
2.22375e-06	0.393816	G3V779;B2RZ67		Lad1	21	57.396	1612100000	246	24.2119	24.5113	24.2994	24.4524	24.6621	24.667	24.0459	24.1442	24.0431	24.7647	24.7366	24.7354	24.6064	24.7712	24.6214	24.5077	25.2927	24.8093	24.242	24.3828	24.2937	24.5955	24.7249	24.6631	24.7491	24.7737	24.7597	23.7861	24.2381	24.3899	24.1778	24.2719	24.3876	24.5338	24.5321	24.4527	24.3379	24.3324	24.6135	24.3285	24.3719
0.000392736	0.395063	P11232;R4GNK3	Thioredoxin	Txn;Txn1	12	11.673	26693000000	539	28.5964	28.7595	28.7998	29.2154	29.1241	29.0611	28.3905	28.3198	28.3371	28.4142	28.3815	28.4615	28.6209	28.4977	28.4776	25.6207	26.3136	26.7523	27.798	27.6861	28.0292	28.6507	28.6361	28.7534	28.3446	28.3519	28.6669	28.9329	28.8059	28.8047	28.0633	28.0342	27.9024	28.7395	28.8991	28.8013	28.4901	28.5594	28.5637	28.271	28.2641
0.00420356	0.395268	F1M4V3;A0A0G2K7I4		Rcsd1	3	40.615	251390000	53	21.6922	22.0698	NaN	NaN	NaN	NaN	21.7451	22.036	NaN	NaN	NaN	22.0196	22.0852	22.5013	21.7741	NaN	NaN	NaN	21.2464	21.4914	21.8901	22.2674	21.505	21.5966	22.1115	22.4511	22.4653	21.2533	21.0046	22.0466	22.2048	NaN	NaN	22.1065	22.1463	22.5584	22.4729	NaN	22.0068	21.2081	21.2301
0.0011644	0.401079	A0A1B0GWQ1;A0A0G2K5C8;P84903;B2RYV1;A0A1B0GWK9	Stromal interaction molecule 1	Stim1	7	62.203	499280000	74	23.0007	23.1034	23.2087	23.1809	23.1981	23.1096	22.8594	23.1052	22.9337	22.3598	22.377	22.254	22.8243	22.9468	22.8294	NaN	NaN	NaN	22.1503	22.1672	22.0203	23.0934	23.1469	23.0923	22.9662	22.7803	22.9827	22.7201	23.0354	22.9167	NaN	22.7651	22.7378	23.1093	22.967	22.8506	23.3944	NaN	NaN	22.2456	22.8013
0.00570157	0.402713	P06302;Q63453;Q63452;F1M034	Prothymosin alpha;Prothymosin alpha, N-terminally processed;Thymosin alpha	Ptma;LOC100359583	10	12.382	12142000000	545	27.6576	27.8317	27.9215	26.3495	25.9567	26.337	27.4097	27.4733	27.4349	27.55	27.6213	27.7432	28.0658	27.9917	27.8721	26.3966	26.6638	26.8677	26.6089	26.5787	26.4181	27.451	27.5101	27.4167	27.3654	27.3691	27.5992	26.3451	26.0712	26.4189	27.501	27.5371	27.5518	27.7144	27.9	27.7249	28.0131	28.0193	28.0178	26.8476	26.5271
0.00126615	0.404597	A0A0G2K9Y5;A0A0G2K3G0;Q99PS8	Histidine-rich glycoprotein	Hrg	7	57.926	854090000	106	24.0192	23.9452	23.901	23.0085	22.8907	23.1936	23.5862	23.257	23.4269	23.7564	23.6506	23.6753	23.8331	23.5656	23.6395	NaN	NaN	NaN	NaN	22.5897	NaN	23.3494	23.6066	23.5548	23.9322	23.7108	24.0148	23.1869	23.1752	23.2401	23.2755	NaN	22.8871	23.3762	23.6718	23.5607	23.9521	24.0732	23.8979	NaN	23.3675
0.00302334	0.406707	D3ZRV0;A0A0G2K8D6	DCN1-like protein	Dcun1d1	2	24.059	244450000	34	NaN	NaN	NaN	NaN	22.4208	22.3463	NaN	22.262	22.3389	NaN	22.4204	NaN	NaN	NaN	NaN	NaN	NaN	NaN	NaN	NaN	NaN	22.3497	22.1755	22.2513	22.827	22.603	22.7303	NaN	NaN	22.1561	NaN	NaN	NaN	22.0487	NaN	NaN	NaN	NaN	NaN	21.9415	NaN
0.00057612	0.419052	P84083	ADP-ribosylation factor 5	Arf5	11	20.529	5024100000	206	26.3255	26.4925	26.33	24.7685	25.022	25.2931	26.0859	26.1384	26.026	26.1178	26.009	25.9722	26.4587	26.5482	26.5086	26.2612	26.1105	26.2927	25.4454	25.7459	25.6696	26.1777	26.2322	26.0025	26.397	26.2373	26.2398	25.1639	25.2025	25.4725	25.6645	25.6958	25.677	25.9547	26.0649	25.9796	26.3162	26.391	26.292	25.6212	25.5377
2.7921e-05	0.419705	Q3ZB99;P70625		Tjp2;ZO-2	14	131.36	1257100000	266	24.0086	24.2429	24.1078	23.6691	24.1849	23.917	23.9958	23.8391	24.2539	24.3483	24.1313	24.5113	24.1419	24.2788	24.698	24.3481	24.2361	24.192	23.5388	23.7695	23.6874	24.2094	24.1699	24.1685	24.3252	24.0428	24.357	23.6695	23.6435	23.2144	24.0018	23.9343	23.7578	24.1655	24.2191	24.1935	24.355	24.6508	24.4391	23.5945	23.8778
0.0016051	0.43013	P45479	Palmitoyl-protein thioesterase 1	Ppt1	4	34.455	752080000	79	24.1199	23.9323	23.8932	24.119	24.2038	24.0903	23.5235	23.531	23.7133	23.9333	23.4114	23.4167	23.9009	NaN	NaN	NaN	NaN	NaN	NaN	22.9819	NaN	24.0552	24.0892	24.121	NaN	NaN	NaN	23.8126	24.1793	24.0017	23.2119	NaN	23.6562	23.5129	23.7045	23.5458	23.7044	NaN	NaN	23.7815	NaN
0.00293069	0.43835	Q5PQK2		Fus	9	52.673	2991900000	323	25.2415	25.321	25.1817	25.6282	25.6852	25.7621	25.2752	25.067	25.3317	25.3955	25.5181	25.5497	25.401	25.7405	25.4958	25.7759	NaN	NaN	24.5568	24.4471	24.6825	25.5427	25.6211	25.5992	25.7162	25.7774	25.6218	25.2752	25.2805	25.1776	24.4155	24.51	24.26	25.3337	25.2526	25.3383	25.1131	25.1911	25.0035	25.5718	25.5948
0.00415087	0.445623	A0A140TAG3;Q6TQE1	Zinc finger CCCH domain-containing protein 18	Zc3h18	4	112.3	40206000000	76	29.3477	NaN	29.3829	NaN	27.9636	27.716	28.6185	28.7998	28.892	28.9833	29.1314	29.1734	29.8074	29.4951	29.5992	NaN	NaN	NaN	NaN	28.1928	NaN	28.6893	29.2016	29.2814	29.4615	29.7142	29.403	28.5786	NaN	28.4885	NaN	NaN	NaN	28.8201	28.9111	28.9367	29.54	29.5822	NaN	NaN	28.6575
1.1704e-05	0.448621	B2RZD4;F1LQ14;D4A4W9;P11250	60S ribosomal protein L34	Rpl34;Rpl34-ps1	11	13.293	3266800000	160	25.4977	25.7475	25.7236	24.3413	23.2473	24.323	25.1149	25.3504	25.3397	25.2177	25.0256	25.0039	26.0487	26.083	25.8893	26.3394	25.2878	25.8166	25.0549	25.3595	25.618	25.495	25.703	25.5308	25.7985	25.9297	26.126	24.8391	24.5692	24.7597	25.6685	25.6701	25.6547	25.6583	25.9153	25.9103	25.9701	26.0511	26.1192	25.1691	24.7559
7.13737e-05	0.453699	Q4FZY0	EF-hand domain-containing protein D2	Efhd2	11	26.759	1239500000	200	24.2115	24.0801	24.0464	23.4329	23.7393	23.3479	23.9903	24.0942	24.1377	24.201	24.2858	24.1836	24.1376	24.1807	24.112	25.0241	24.865	24.7786	23.3868	23.3151	23.5699	24.3358	24.285	24.2502	24.6225	24.4392	24.4981	23.4991	22.4298	23.2932	24.1783	23.9851	23.7805	23.8341	23.8431	24.0205	24.2052	24.2918	24.222	23.7301	23.6813
9.68056e-06	0.45654	P52925;D3ZS25;D3ZN59	High mobility group protein B2	Hmgb2;RGD1561694;LOC100911856	11	24.159	3468600000	281	25.4983	25.7101	25.5997	24.044	24.1507	24.3384	25.2029	25.2285	25.2604	26.0638	25.9256	26.0266	25.8612	25.6451	25.8382	25.5164	26.0917	26.0418	24.9529	25.0353	25.0897	25.547	25.4412	25.5186	25.765	25.8312	25.8347	24.3766	24.4761	24.4683	25.3655	25.2805	25.2739	25.6597	25.4577	25.6281	25.879	25.8803	26.0684	24.9199	24.9483
0.00204485	0.45656	Q6PAH0;Q65ZS7;A0A0G2K151;P02650	Apolipoprotein E	Apoe	15	35.763	4080700000	378	25.9754	25.9548	26.1127	25.6509	25.5283	25.7041	25.6528	25.6855	25.876	26.192	26.2885	26.2068	26.0358	26.2286	26.2173	24.1499	NaN	NaN	25.3296	25.0337	24.9901	25.5176	25.5808	25.5291	26.2304	26.1042	26.1641	25.4011	25.3531	25.4193	24.993	25.179	24.7519	25.2071	25.2099	25.2072	26.1587	26.1513	26.0731	25.8341	25.7637
0.0059671	0.468515	B5DES0;M0R8K2		Snrpd2;Snrpd2l	6	13.527	1483800000	158	24.4151	24.3231	24.554	23.0288	22.9478	22.8205	23.8728	24.1415	24.1499	24.4702	24.6323	24.5048	24.6669	24.3987	24.7855	NaN	NaN	NaN	23.3258	23.4423	23.3927	24.4254	24.2797	24.5391	24.8441	24.879	24.8641	23.1282	23.287	23.5062	23.4107	23.7157	24.7413	24.278	24.0893	24.122	24.5721	24.3406	24.5555	23.5207	24.2431
0.00302734	0.47885	P08082	Clathrin light chain B	Cltb	11	25.117	1916900000	181	25.2677	25.1651	25.3715	22.4554	22.5021	22.6025	24.7272	24.6343	24.686	25.1323	25.056	25.0405	25.1672	25.0926	25.0896	24.7147	24.2711	23.7421	24.3575	23.5036	23.7765	24.8622	24.9085	25.1055	24.2439	24.2795	24.2663	23.5358	23.1387	23.746	24.6027	24.5228	24.6913	25.1467	25.2197	25.2915	25.3826	25.3869	25.234	23.7232	23.9346
2.25254e-05	0.481237	Q5RKG9		Eif4b	8	69.063	1103100000	204	24.1312	24.0415	23.9563	22.8229	22.7452	22.5614	23.6439	23.6312	23.7286	23.9594	24.0943	23.9232	24.1159	23.6196	24.1212	NaN	NaN	NaN	22.9911	23.1477	22.968	24.2499	24.0147	24.1574	24.1766	24.0768	24.2886	23.0825	22.7664	21.631	23.7065	23.6964	23.7265	23.8282	23.8554	23.9594	24.0768	24.0577	24.0365	23.4043	23.2464
0.012591	0.486483	P04785	Protein disulfide-isomerase	P4hb	44	56.951	52586000000	1793	29.5444	29.5769	29.5247	29.478	29.4459	29.3921	29.6744	29.7177	29.7151	29.2502	29.278	29.2866	29.6511	29.6461	29.7319	29.1251	28.8443	29.0371	28.4994	28.5056	28.5459	29.3482	29.2875	29.2916	30.0614	30.061	29.9829	29.2706	29.2931	29.2479	28.4503	28.6167	28.7039	29.3061	29.3527	29.3347	29.3483	29.345	29.3997	29.5375	29.5285
6.51089e-05	0.513243	F1M2K3;P61959;D4A7L5;Q5XIF4	Small ubiquitin-related modifier;Small ubiquitin-related modifier 2;Small ubiquitin-related modifier 3	Sumo2;Sumo3	2	10.77	637520000	64	23.9514	23.9214	23.9781	NaN	NaN	NaN	23.0747	22.8423	22.9373	23.3633	23.2593	NaN	23.4218	23.2666	23.4578	NaN	NaN	NaN	23.1786	23.1196	23.0274	NaN	23.6991	23.6524	23.0635	NaN	NaN	NaN	NaN	NaN	23.3719	23.4408	23.3798	23.5956	23.6651	NaN	23.5964	23.5051	23.4499	NaN	NaN
0.0126271	0.521617	D3ZZY7		Kansl1l	2	103.9	881850000	50	23.919	23.6033	NaN	22.0317	22.1468	22.0756	22.8261	22.9668	23.2541	23.8212	25.5061	23.7804	23.6618	NaN	NaN	NaN	NaN	NaN	NaN	NaN	NaN	23.8252	23.4525	23.5107	NaN	NaN	NaN	22.5976	22.6235	22.6428	NaN	23.0293	22.944	NaN	NaN	NaN	23.1149	NaN	NaN	NaN	23.0324
6.81032e-05	0.527031	D4A5R0;D3ZUZ9	Peptidyl-prolyl cis-trans isomerase	Ppih	2	19.093	265580000	40	22.0526	22.3144	22.2248	NaN	NaN	NaN	21.7574	NaN	21.6301	22.0464	21.9957	21.9754	NaN	22.112	22.1114	NaN	NaN	NaN	21.4604	21.3178	20.9165	22.3171	NaN	22.163	21.9973	22.1181	22.2338	NaN	NaN	NaN	21.7097	21.9838	22.0216	21.8945	21.9497	22.0917	22.4204	22.4	22.5001	NaN	NaN
3.66837e-09	0.537376	Q99MZ8	LIM and SH3 domain protein 1	Lasp1	17	29.97	9407600000	603	27.0982	27.1621	27.2611	25.8729	25.7316	25.731	26.6389	26.5929	26.798	27.3452	27.2591	27.2522	27.2415	27.3161	27.3809	27.2061	27.4568	27.7391	26.4352	26.3718	26.5121	27.1415	27.1456	27.1418	27.1314	27.1888	27.2111	25.9574	25.6541	25.6733	26.8818	26.8427	26.8269	27.2437	27.3204	27.223	27.2916	27.4267	27.3531	26.1403	25.9915
0.00340182	0.544088	Q62878;F1LNS3;P22071	3 beta-hydroxysteroid dehydrogenase/Delta 5-->4-isomerase type 4;3-beta-hydroxy-Delta(5)-steroid dehydrogenase;Steroid Delta-isomerase	Hsd3b6;Hsd3b	10	41.957	2072300000	188	25.3789	25.4262	25.3348	24.0686	23.9774	23.9679	24.9173	24.8961	24.679	24.6984	24.4656	24.8331	25.1261	25.1369	25.1178	NaN	NaN	NaN	25.3183	25.193	25.0705	25.2238	25.2375	25.3247	25.3542	25.1999	25.3013	24.586	24.8358	24.8078	24.9065	24.8994	25.0088	24.746	24.619	24.8576	24.8629	24.9986	25.1874	25.6008	25.6638
0.00110355	0.56308	P04639	Apolipoprotein A-I;Proapolipoprotein A-I	Apoa1	11	30.062	2461400000	184	25.1963	25.479	25.217	25.1016	25.1575	24.43	24.848	24.8414	24.6351	25.2754	25.5136	25.4505	25.4347	25.4862	25.2149	NaN	NaN	NaN	24.2659	23.9653	24.0715	24.9526	25.0295	24.807	25.6574	25.6782	25.5985	24.6467	24.3284	24.9773	24.0673	24.2672	24.4122	24.8192	25.1089	25.0447	25.1232	25.4016	25.1617	25.1856	24.9578
0.00224483	0.568972	P20761	Ig gamma-2B chain C region	Igh-1a	6	36.497	1668200000	110	24.6169	24.4616	24.5996	24.2752	24.2068	24.4421	24.258	24.1265	24.0867	24.0822	24.0367	24.0869	25.3316	25.3673	25.4169	NaN	25.4452	25.7093	23.6502	23.9919	23.824	24.5811	24.4136	24.4705	24.9358	25.0914	25.0945	24.6775	24.6385	24.7926	23.8069	23.6256	23.9263	24.0687	23.9979	24.2743	24.6618	24.4886	24.5627	24.0369	NaN
0.000554915	0.568988	Q4QQV6		Lsp1	8	36.559	882850000	236	23.7326	23.7683	23.736	23.7161	23.3099	23.3112	23.6189	23.1789	23.4697	23.912	23.911	23.98	24.1037	24.0245	24.2037	NaN	NaN	NaN	22.7238	22.9463	22.5727	23.8667	23.8456	23.8383	24.4992	24.1801	24.317	22.7869	23.0937	22.9894	22.9711	22.7742	22.8438	23.957	23.7718	23.8688	23.5644	23.3499	23.5335	23.4984	23.3399
0.000125577	0.575325	O35314	Secretogranin-1;PE-11;CCB peptide short form;CCB peptide long form	Chgb	10	77.535	782330000	81	23.9184	23.2348	23.8031	NaN	22.177	22.9393	23.086	23.1181	23.1959	23.6297	23.4866	23.5796	23.5498	23.7496	23.2443	NaN	NaN	NaN	23.1092	22.945	23.1869	23.8618	24.0315	23.8074	24.015	23.7335	23.926	23.3237	23.1841	23.2034	23.3262	22.4587	NaN	23.4875	23.5473	23.5014	24.1163	23.9795	23.9224	NaN	23.2461
0.0201143	0.576908	D4ADS4		Mgst3	4	16.732	641380000	59	23.2181	23.594	23.1036	22.3619	23.4312	22.0832	23.1297	22.9699	22.3043	24.5469	24.338	23.8402	23.3164	23.4878	23.4343	NaN	NaN	NaN	22.0281	22.5136	NaN	23.5209	23.0407	23.2877	NaN	NaN	NaN	23.8092	24.4173	24.1495	NaN	21.3245	NaN	23.2646	23.4747	23.2026	22.786	NaN	22.9792	NaN	NaN
0.0151029	0.580473	Q63035	NACHT, LRR and PYD domains-containing protein 6	Nlrp6	4	98.323	808900000	61	23.5479	23.8263	NaN	NaN	NaN	22.1791	23.5194	NaN	NaN	NaN	23.1616	22.9103	NaN	NaN	NaN	NaN	NaN	NaN	NaN	23.3489	23.4223	NaN	NaN	23.2534	24.2304	NaN	24.1547	NaN	22.6845	NaN	NaN	NaN	22.9676	NaN	NaN	NaN	NaN	23.7158	NaN	22.7495	23.3479
0.00812774	0.58279	P15429	Beta-enolase	Eno3	13	47.013	1527000000	96	NaN	NaN	24.4198	NaN	NaN	NaN	23.8541	24.0748	23.9172	24.251	24.8738	24.8096	24.7589	24.6034	24.7884	NaN	NaN	NaN	23.0874	22.8121	NaN	23.7762	23.6047	23.6645	NaN	24.515	24.7473	24.6164	24.2628	24.4271	NaN	NaN	NaN	24.5028	NaN	24.5517	24.0714	24.2321	24.3164	24.4263	24.4957
0.00882491	0.606123	F1LMW7;P30009	Myristoylated alanine-rich C-kinase substrate	Marcks	8	29.959	1489800000	284	24.4137	24.8656	24.8558	23.5397	23.8577	23.35	24.4874	24.3409	24.5358	24.0625	24.3821	24.0496	24.8222	24.6388	24.5927	NaN	NaN	NaN	22.9502	22.9613	22.9849	24.4439	24.3671	24.1933	24.6166	24.6581	24.7478	23.6157	23.7432	23.8215	23.3515	23.5656	22.9956	24.0006	24.0525	24.0318	24.4968	24.4712	24.4774	23.8139	23.9885
0.000469186	0.620617	D3ZP75		Lypd8	1	26.642	2953900000	98	25.263	25.5321	NaN	NaN	NaN	NaN	25.658	25.5985	25.668	26.0983	25.9522	26.0301	25.8594	25.7348	25.5404	NaN	NaN	22.2193	24.3649	24.52	24.3176	25.5655	25.7782	25.3949	25.4156	25.3913	25.4251	24.58	24.3725	24.6183	24.4954	24.5074	24.4235	25.1734	25.3598	25.4028	25.6531	25.726	25.7692	24.9504	25.1678
0.0234941	0.620888	P01041	Cystatin-B	Cstb	7	11.196	4264700000	193	25.9173	25.9287	25.973	26.2904	26.0705	26.1909	26.1127	25.9915	26.1333	25.9294	25.8498	25.8743	26.135	26.1329	26.0601	24.7925	NaN	NaN	24.0848	24.1716	23.9865	25.0231	25.2855	25.0471	26.1202	26.1886	25.9578	25.4252	25.5296	25.5626	24.6727	24.2387	24.6321	25.8043	25.4162	25.6201	25.815	25.7074	25.849	25.8964	26.0227
0.000304842	0.629676	D4A9L5;D3ZMI4;A0A0G2K0F3;Q9WTP0;A0A0G2K0B2;D4ACZ4	Band 4.1-like protein 1	Epb41l1	4	98.212	214910000	63	NaN	22.5634	22.2121	21.458	NaN	NaN	21.5633	21.6785	21.6257	22.1083	22.3583	21.9148	22.6069	22.2987	NaN	NaN	NaN	NaN	NaN	NaN	NaN	NaN	NaN	NaN	22.1711	22.5655	22.6215	NaN	NaN	21.2152	NaN	NaN	NaN	NaN	22.2597	22.2084	NaN	NaN	NaN	21.7536	NaN
0.0220479	0.637074	Q6P7S6;G3V836;P05371;Q9ERD1;O35510;A0A0G2KB42	Clusterin;Clusterin;Clusterin beta chain;Clusterin alpha chain	Clu	7	51.464	1373000000	73	25.0307	24.9252	24.9126	23.5411	24.4709	24.3296	24.8649	24.5847	24.8616	24.7438	25.0027	24.8437	24.7304	NaN	NaN	23.52	23.3502	NaN	NaN	22.7825	23.8155	24.6539	25.0556	24.6215	25.1208	25.3682	25.1062	23.8918	23.2794	23.5409	23.8706	23.3596	23.6504	25.3906	25.357	25.6038	25.012	24.6632	23.905	23.3302	23.8704
0.00167191	0.641716	M0RCA3		Zfpl1	3	34.253	199160000	55	NaN	NaN	NaN	NaN	NaN	NaN	21.2621	21.555	NaN	NaN	21.9763	21.127	NaN	NaN	22.0088	NaN	NaN	NaN	21.1691	21.1058	NaN	NaN	NaN	NaN	21.8014	NaN	22.2263	21.1055	21.4377	NaN	NaN	21.8658	22.2047	NaN	22.1903	22.2461	22.1542	22.475	22.3182	21.1152	NaN
0.00808453	0.657675	F1M0F9;P33273;Q63853;A0A0G2JTR5;D3Z7Y1;A0A1B0GWS1;A0A0G2K879;D4A253;B5AMZ7;Q5I0P5;P19225;P20814;P10610;P08683	Cytochrome P450 2C55	Cyp2c13;Cyp2c55	16	55.941	3640400000	327	26.0729	25.9985	26.0934	24.875	24.7561	24.5585	25.8983	25.9047	25.8799	25.9743	25.8163	25.675	26.0339	25.7324	25.7571	23.5676	24.1793	NaN	25.9565	25.99	25.8764	26.4972	26.2024	26.3794	25.9948	26.1932	26.0842	25.8346	25.6744	25.7766	25.9455	25.9264	25.9739	25.4134	25.3568	25.4342	25.9722	25.9868	25.925	26.5007	26.418
0.000794727	0.690058	D4ABI6;Q91Y78	Ubiquitin carboxyl-terminal hydrolase;Ubiquitin carboxyl-terminal hydrolase isozyme L3	Uchl3	7	26.109	1391500000	157	24.1893	24.2611	24.4738	24.6952	24.7077	24.4437	23.9868	23.8008	23.7823	24.4922	24.3885	24.5593	24.4751	24.6816	24.5432	23.9131	23.6703	23.6347	23.9131	24.2096	23.2143	24.1092	24.1526	24.183	24.3574	24.6935	24.651	23.3475	22.7762	22.9548	22.7012	22.4247	22.8449	24.5943	24.5789	24.3549	24.031	24.1035	24.0772	23.2975	22.4537
0.00166828	0.713717	P62329;M0R7Y9;A0A0G2K021	Thymosin beta-4;Hematopoietic system regulatory peptide	Tmsb4x	8	5.0526	64639000000	717	29.945	30.0977	30.1701	29.0452	29.2065	29.1897	29.9241	29.8255	29.9098	29.9798	29.9709	29.903	30.454	30.4138	30.3747	27.5496	28.1711	27.7356	28.5526	28.5932	28.7646	29.8209	29.6959	29.7377	30.1225	30.0907	30.1274	29.2241	29.1878	28.9679	28.4778	28.4323	28.4614	29.9739	29.9567	29.9675	29.9647	30.0046	29.9871	29.4326	29.5237
0.0162595	0.735508	P0DP31;P0DP30;P0DP29;D4ABV5;Q5U206;M0RCJ6;Q304F3		Calm2	13	16.837	97091000000	767	30.4163	30.4202	30.5724	30.7413	30.7641	30.8129	30.642	30.6153	30.5843	30.9287	30.9776	30.8941	30.5783	30.6427	30.6058	NaN	24.6199	NaN	28.6498	28.9262	28.7428	30.5227	30.416	30.3562	30.4537	30.3501	30.1179	30.1478	30.1183	30.2743	28.0871	28.2252	28.0879	30.4554	30.3201	30.3638	30.2465	30.1054	30.2561	30.5655	30.596
0.00701967	0.744047	B5DEF6;F1LSP2;M0R6F2		Acad10	6	119.27	211510000	10	NaN	NaN	NaN	NaN	NaN	NaN	21.9062	NaN	NaN	NaN	22.4386	NaN	NaN	NaN	NaN	NaN	NaN	NaN	NaN	NaN	NaN	NaN	NaN	NaN	NaN	NaN	NaN	NaN	NaN	NaN	NaN	NaN	NaN	NaN	NaN	NaN	22.6971	22.5376	22.8292	NaN	NaN
0.00310922	0.759572	B2GVB1;P05964	Protein S100;Protein S100-A6	S100a6	9	10.035	36261000000	302	28.8355	28.7447	29.624	28.9127	28.1267	27.1675	29.7825	28.7708	28.717	29.6202	29.3161	28.9461	30.5397	29.5937	29.4478	26.5314	25.8751	26.4008	27.3023	28.6322	28.0117	27.969	27.5284	27.6583	28.6872	29.763	29.4462	28.9131	29.2066	28.4497	27.6717	28.5024	27.3146	27.9277	28.0534	27.8682	28.9271	29.9034	29.1037	27.7372	28.1002
0.0123692	0.783055	A0A0G2JZ73;A0A0G2JY31;P17475	Alpha-1-antiproteinase	Serpina1	12	46.634	4308400000	314	27.0135	27.0548	27.0819	25.3562	25.1536	25.2672	26.0489	25.8866	26.0411	26.151	26.1089	26.0408	26.3129	26.2436	26.281	24.1548	24.2219	24.3541	24.3027	24.3762	24.2495	26.2583	26.2941	26.1512	25.646	25.5942	25.4807	25.9136	25.957	26.0366	24.4544	24.3869	24.419	25.8191	25.8486	25.8788	24.9213	24.8741	24.9885	24.9817	24.9072
4.52322e-05	0.787	P62634;Q4AE93	Cellular nucleic acid-binding protein	Cnbp	7	19.463	910070000	122	23.698	23.8217	24.1228	23.1856	23.7645	23.6308	23.26	23.2713	23.3042	23.6452	23.6834	23.5023	24.1359	24.171	24.0272	23.2347	23.1783	23.9176	22.399	22.7213	23.0144	23.3665	23.5653	23.5877	24.285	24.2698	24.5417	22.9203	22.8026	22.6949	21.8073	23.4725	23.438	23.7055	24.0352	23.4613	23.9695	24.1172	24.1987	23.6994	23.549
0.000245819	0.792773	D4AED6;A0A0G2K8S3;F1M3Y3		Wbscr27	7	27.398	664820000	64	23.9802	23.9822	24.0679	23.1324	23.1935	23.4832	23.5563	23.2303	23.2253	23.5093	23.4459	23.4112	23.0951	23.0343	23.264	24.7791	23.8954	24.0876	22.8347	22.975	NaN	22.975	23.6497	23.2389	NaN	NaN	NaN	22.1612	NaN	22.2565	22.5816	22.5721	22.608	23.1942	NaN	23.1134	23.4156	23.6734	23.9329	22.623	22.7482
0.00240864	0.816379	P07151	Beta-2-microglobulin	B2m	4	13.72	1795000000	93	26.0216	25.9792	25.9239	22.9824	23.2497	23.9726	24.8211	25.062	24.9854	24.6817	24.6937	24.0859	25.4685	25.5394	25.5842	NaN	NaN	NaN	23.2076	23.5847	23.4191	24.7385	24.8091	24.8702	24.6311	24.5712	24.4868	NaN	24.2994	24.2731	23.5577	23.4608	23.581	24.8268	24.7329	24.6833	24.3136	23.9935	24.0057	24.3956	24.3548
0.0208765	0.824881	B2RZD6		Ndufa4	4	9.3267	267890000	62	22.5673	22.4542	22.7383	NaN	NaN	NaN	21.7876	21.7205	21.8543	21.7921	NaN	NaN	22.2435	NaN	NaN	20.9973	NaN	NaN	20.399	20.4388	NaN	22.8384	22.7452	22.3699	NaN	21.5839	NaN	NaN	20.7138	20.9695	21.0303	NaN	NaN	22.7865	22.5647	22.6832	NaN	NaN	NaN	21.0628	21.335
0.00123216	0.880542	D3ZF53		LOC691277	4	25.038	1320200000	162	24.7577	24.7945	24.8014	22.5224	22.4517	21.1448	24.3758	24.283	24.0214	24.4105	24.2613	24.4234	24.2588	24.8669	24.6098	NaN	NaN	NaN	23.7426	24.6715	24.5641	24.5959	24.6519	24.8908	25.4091	25.3055	25.3957	23.8433	23.9301	23.7343	24.0862	22.6404	24.2266	23.6426	23.7942	23.4985	24.4135	24.164	24.2693	24.4793	24.4969
0.0072053	1.71372	A0A0G2K1U8;P55091	Chymotrypsin-C	Ctrc	7	29.109	1228200000	52	24.3172	25.1087	24.0342	NaN	NaN	NaN	22.7999	22.89	22.4189	NaN	NaN	NaN	22.3669	NaN	NaN	NaN	NaN	NaN	23.0436	22.8895	NaN	NaN	NaN	NaN	21.9871	NaN	NaN	22.0337	22.8552	23.0982	22.7786	22.8011	23.0122	NaN	NaN	22.188	25.3909	25.3371	25.1468	23.0432	23.2731
0.042116	3.22764	A0A0G2JSZ2;P02783	Seminal vesicle secretory protein 4	Svs4	6	11.931	4409800000	196	29.3712	29.3372	29.3512	23.6516	22.9224	23.2053	25.8151	25.9896	26.1457	NaN	NaN	NaN	28.4816	28.5445	28.0533	22.0767	NaN	21.964	20.7942	20.5234	22.7959	NaN	NaN	NaN	20.8665	20.7393	NaN	NaN	NaN	NaN	23.3144	23.6258	23.535	NaN	NaN	NaN	NaN	NaN	NaN	NaN	NaN
1.81995e-07	3.27835	D3ZJA4		Svs6	5	11.365	1309900000	62	27.4966	27.4711	27.4036	NaN	19.7755	20.7821	24.1088	23.777	23.9719	NaN	NaN	NaN	26.9898	26.9902	27.0343	NaN	NaN	NaN	NaN	NaN	NaN	NaN	NaN	NaN	NaN	NaN	NaN	NaN	NaN	NaN	NaN	NaN	NaN	NaN	NaN	NaN	NaN	NaN	NaN	NaN	NaN
8.77412e-07	3.34117	A0A0G2JTC7;P04812;Q9QZV2	Seminal vesicle secretory protein 5	Svs5	6	13.619	895780000	66	27.0555	27.0427	27.0264	NaN	NaN	NaN	23.4691	23.3134	23.3774	NaN	NaN	NaN	26.3874	26.4076	26.4473	NaN	NaN	NaN	NaN	NaN	NaN	NaN	NaN	NaN	NaN	NaN	NaN	NaN	NaN	NaN	NaN	NaN	NaN	NaN	NaN	NaN	NaN	NaN	NaN	NaN	NaN
0.023387	3.94404	Q6P6X2;P22006	Seminal vesicle secretory protein 2	Semg1;Svs2	20	45.552	12065000000	212	30.9001	30.9199	31.0179	24.4867	24.1741	24.1503	26.6337	26.4495	27.2019	NaN	NaN	NaN	30.0557	29.9503	30.026	NaN	NaN	NaN	23.024	21.6819	21.2054	NaN	NaN	NaN	21.0813	NaN	22.242	NaN	NaN	NaN	24.2955	24.1345	24.3448	NaN	NaN	NaN	NaN	NaN	NaN	NaN	NaN
1	NaN	A0A0G2JY71;A0A023ILP9;P97949;P97561;P97560;P97559;A0A023IMI8;A0A023IM48;A0A023IKJ0;A0A023IKD8;P36370	Antigen peptide transporter 1	Tap2;Tap1;tap1	1	8.8132	19128000	0	NaN	NaN	NaN	NaN	NaN	NaN	NaN	NaN	NaN	NaN	NaN	NaN	NaN	NaN	NaN	NaN	NaN	NaN	NaN	NaN	NaN	NaN	NaN	NaN	NaN	NaN	NaN	NaN	NaN	NaN	NaN	NaN	NaN	NaN	NaN	NaN	NaN	NaN	NaN	NaN	NaN
1	NaN	Q5UT97;A0A023IKL2;Q31286;P79591;Q5UT95		RT1-Bb;Bb;LOC688090	1	30.108	5145400	6	NaN	NaN	NaN	NaN	NaN	NaN	NaN	NaN	NaN	NaN	NaN	NaN	NaN	NaN	NaN	NaN	NaN	NaN	NaN	NaN	NaN	NaN	NaN	NaN	NaN	NaN	NaN	NaN	NaN	NaN	NaN	NaN	NaN	NaN	NaN	NaN	NaN	NaN	NaN	NaN	NaN
0.369034	0.118983	A0A023IMI6;A0A023IM45;P28064;A0A023IKI3	Proteasome subunit beta type;Proteasome subunit beta type-8	Psmb8	10	30.569	1377700000	142	24.2348	23.9668	23.9639	24.2781	24.3723	24.3773	24.1552	23.7716	23.8485	24.2888	24.3046	24.2092	24.2463	24.3352	24.5193	NaN	NaN	NaN	24.3071	24.3401	24.5763	24.5008	24.5658	24.4666	24.5608	24.8367	24.6184	23.9164	24.0901	24.3255	24.1681	24.1972	24.2101	24.1128	24.2521	24.4543	24.2179	24.2447	24.3043	24.6652	24.7548
0.810695	0.039973	Q99JC6;A0A023IM54		Tapbp	5	50.044	366050000	58	23.0621	23.0958	23.2895	NaN	23.0614	23.1653	22.5539	22.5991	22.8781	NaN	NaN	NaN	22.7034	NaN	22.532	NaN	NaN	NaN	NaN	NaN	NaN	23.3086	22.8529	22.872	23.0246	NaN	22.6792	23.2578	22.8904	23.2233	NaN	NaN	NaN	23.239	23.1725	NaN	NaN	NaN	NaN	23.2601	23.15
1	NaN	A0A059NZR0;Q6AXU6	Hematological and neurological expressed 1 protein;Hematological and neurological expressed 1 protein, N-terminally processed	Hn1	5	15.575	201250000	65	NaN	NaN	NaN	NaN	NaN	NaN	NaN	NaN	NaN	NaN	NaN	NaN	NaN	NaN	NaN	24.1486	23.6409	23.9299	NaN	NaN	NaN	NaN	NaN	NaN	NaN	NaN	NaN	NaN	NaN	NaN	NaN	NaN	NaN	NaN	NaN	NaN	NaN	NaN	NaN	NaN	NaN
0.186754	0.147641	Q5BK20;A0A059NZV6;D3ZDL0	Hematological and neurological expressed 1-like protein	Hn1l;RGD1559903	2	20.07	233040000	30	21.9944	NaN	NaN	NaN	22.6819	22.1706	NaN	21.8731	NaN	22.3772	22.286	22.2788	21.8881	22.0125	NaN	NaN	NaN	NaN	NaN	NaN	NaN	NaN	NaN	22.0108	NaN	22.0384	22.2365	NaN	NaN	NaN	NaN	NaN	NaN	NaN	NaN	NaN	NaN	NaN	NaN	22.1631	NaN
0.697467	-0.182864	A0A068FP44;Q4AE70	Histone-arginine methyltransferase CARM1	CARM1;Carm1	5	66.583	282970000	31	NaN	NaN	NaN	NaN	NaN	NaN	23.1914	23.1321	NaN	22.0341	22.2042	NaN	NaN	NaN	NaN	23.2364	NaN	23.3449	23.6553	23.8826	22.8808	NaN	22.2236	22.1807	NaN	NaN	23.1338	NaN	NaN	NaN	22.3907	22.3949	22.1543	NaN	NaN	NaN	NaN	22.5109	NaN	22.4508	NaN
0.547262	0.120837	B0BNF3;A0A090BZQ0;A0A1B0GWR8;P01283	VIP peptides;Intestinal peptide PHV-42;Intestinal peptide PHI-27;Vasoactive intestinal peptide	Vip	3	18.992	404620000	76	22.1922	22.2618	22.1933	NaN	NaN	NaN	NaN	22.4496	22.4902	NaN	22.997	NaN	22.859	NaN	23.1621	23.6014	23.591	23.4378	22.341	22.3589	22.358	22.5615	NaN	NaN	22.9818	NaN	22.7817	22.1643	NaN	21.8767	NaN	NaN	NaN	22.4209	22.5125	22.5196	22.6348	23.4654	NaN	22.5182	22.3417
0.0380665	0.157029	A0A096MIS3;Q63186	Translation initiation factor eIF-2B subunit delta	Eif2b4	5	57.522	303580000	36	22.0771	22.1366	22.1943	NaN	22.1257	NaN	21.9386	21.7544	21.5522	22.4122	22.5485	22.3828	21.9467	22.2382	22.3611	NaN	NaN	NaN	21.8213	22.2826	21.8485	22.1559	22.3225	22.5595	22.4013	22.1435	22.417	NaN	21.1357	NaN	22.3272	22.1518	21.9986	22.3134	NaN	22.3857	22.2337	22.3593	22.2956	21.3662	21.7493
1	NaN	A0A096MIT4;Q66H70	Interleukin-33	Il33	1	29.441	39178000000	27	NaN	NaN	NaN	NaN	NaN	NaN	NaN	NaN	NaN	NaN	NaN	NaN	NaN	NaN	NaN	NaN	NaN	NaN	NaN	NaN	NaN	NaN	NaN	NaN	NaN	NaN	NaN	NaN	NaN	NaN	NaN	NaN	NaN	NaN	NaN	NaN	NaN	NaN	NaN	NaN	NaN
1	NaN	A2VD14;A0A096MIV5;F1M8H5;A0A096MJ15		Abcf2	6	71.426	230130000	11	NaN	NaN	NaN	NaN	NaN	NaN	NaN	NaN	NaN	NaN	NaN	NaN	NaN	NaN	NaN	23.5938	23.4328	23.7412	NaN	NaN	NaN	NaN	NaN	NaN	NaN	NaN	NaN	NaN	NaN	NaN	NaN	NaN	NaN	NaN	NaN	NaN	NaN	NaN	NaN	NaN	NaN
0.72035	0.0162455	A0A096MIX2;E9PT29;A0A096MJW9;Q568Z8		Ddx17	24	72.644	4714700000	492	25.996	26.044	25.7903	26.0888	26.1338	26.1168	25.7612	25.9317	25.8429	26.0831	26.053	26.0535	25.8624	25.8499	26.0262	26.6694	26.0157	26.3383	26.0579	26.0256	26.0917	26.1107	26.096	26.0944	26.0019	26.1263	26.1481	25.984	25.9854	25.8924	26.1122	26.0463	26.1118	26.0757	26.061	26.0594	25.9369	26.0254	26.0813	26.0868	26.0134
0.667373	-0.0421797	A0A096MJ01;A0A096MKD4;A0A0G2JYM0;Q5XIG1;A0A0G2JXR0		Ldb3	9	76.815	760060000	135	23.2268	23.3955	23.3171	NaN	23.7964	23.5819	23.1322	23.0663	23.2308	23.5074	23.3378	23.3337	22.8363	23.1559	23.0511	24.1776	24.2097	NaN	23.4156	23.4811	23.6004	23.1462	22.6839	23.3395	23.5811	23.4338	23.526	23.9299	23.3391	23.7243	22.9685	22.9896	22.4424	23.4565	23.0487	23.3732	23.1655	23.1123	23.3635	23.2524	23.5574
0.0290648	0.228753	A0A096MJ11		Gsdmd	10	53.212	1179600000	85	24.0995	24.3727	24.2271	NaN	23.6843	23.6868	23.7463	24.0432	23.9474	24.0211	24.0326	24.181	24.2988	24.0343	24.0267	NaN	NaN	NaN	23.7497	23.6339	23.4191	23.5215	23.6841	23.8494	24.3477	24.0478	24.3899	22.8483	23.6856	23.6222	24.3047	24.0976	24.0914	23.8078	23.8001	24.079	24.0452	24.0846	24.3339	23.7285	23.4102
0.146614	0.523346	Q6IMX5;O35754;A0A0G2JYC5;A0A096MJ39;Q07969;Q1XIH4;A0A096MJJ0;Q5BKE5;F7F5B5;D4A8Z2	Platelet glycoprotein 4	LOC685953;CD36/FAT;Cd36;RGD1562323;RGD1565355	3	52.686	306700000	43	NaN	23.0744	22.6845	NaN	NaN	23.0325	NaN	NaN	22.8202	NaN	NaN	NaN	NaN	NaN	NaN	NaN	NaN	NaN	NaN	NaN	NaN	23.2251	NaN	23.1762	NaN	NaN	NaN	23.6509	23.5253	23.5881	22.768	NaN	22.9386	NaN	22.9757	22.8259	NaN	NaN	NaN	NaN	22.9795
0.259576	0.235054	A0A096MJ41;D4A1V2		Fam3b	8	26.407	987740000	140	23.0242	23.3041	23.1599	24.1235	24.0563	24.0049	23.4779	23.1548	23.5443	23.8565	23.6964	23.7416	24.6173	24.3749	24.7069	NaN	NaN	NaN	23.8133	24.0911	23.9653	23.5316	23.3923	23.1489	22.7781	22.7597	22.8475	23.7783	23.783	23.7728	23.3762	23.149	23.2451	23.7266	23.6887	23.5811	24.0547	24.0272	24.1312	24.4349	24.4376
1	NaN	A0A096MJ42;A0A0G2K0Y9;Q62936	Disks large homolog 3	Dlg3	2	90.384	67642000	6	NaN	NaN	NaN	NaN	NaN	NaN	NaN	NaN	NaN	NaN	NaN	21.3508	NaN	NaN	NaN	NaN	NaN	NaN	NaN	NaN	NaN	NaN	NaN	NaN	NaN	NaN	NaN	NaN	NaN	NaN	NaN	NaN	NaN	NaN	NaN	NaN	NaN	NaN	NaN	NaN	NaN
0.0503402	0.269682	A0A096MJ98		Parp4	4	45.861	194990000	62	NaN	21.6219	NaN	NaN	21.668	NaN	NaN	NaN	22.1069	21.8479	21.874	NaN	22.1263	22.3829	22.1273	NaN	NaN	NaN	21.7074	22.0127	21.8541	NaN	21.8022	21.9213	22.4511	22.205	NaN	NaN	NaN	NaN	NaN	NaN	22.2536	21.5708	NaN	22.4794	NaN	NaN	NaN	NaN	21.4059
0.000153206	-0.269819	A0A096MJA9;A0A096MKE0;A0A0G2K2B5;A0A096MIY8;A0A096MK70;A0A096MJR0;A0A096MJT4;Q5U2Q8;A0A0G2KAD6		Asph	11	74.889	1862700000	245	24.7139	24.4508	24.6189	25.1214	25.1155	25.1202	24.6469	24.7949	25.2058	24.0429	24.1704	23.9608	24.6587	24.7583	24.6374	25.0174	NaN	NaN	25.1625	25.0576	24.8313	24.6309	24.7162	24.8955	24.4893	24.4641	24.448	24.8885	24.9291	24.9265	24.8011	24.8722	25.0438	24.6234	24.4895	24.4777	24.5258	24.4228	24.3875	24.7982	24.9994
1	NaN	A0A096MJB3;M0R565		Wdr82	4	25.305	170510000	18	NaN	NaN	NaN	NaN	NaN	NaN	NaN	NaN	NaN	NaN	NaN	NaN	NaN	21.3863	NaN	NaN	NaN	NaN	NaN	NaN	NaN	NaN	NaN	NaN	NaN	NaN	NaN	21.829	NaN	NaN	NaN	NaN	NaN	NaN	21.7422	NaN	NaN	NaN	NaN	21.7832	22.0809
1	NaN	A0A096MJC5;B5DEN7;A0A096MJV2;D3Z8K0		Pdzd11	1	7.948	184760000	11	NaN	NaN	NaN	NaN	NaN	NaN	NaN	NaN	NaN	NaN	NaN	NaN	NaN	NaN	NaN	NaN	NaN	NaN	NaN	NaN	NaN	NaN	NaN	NaN	NaN	NaN	NaN	NaN	NaN	NaN	NaN	NaN	NaN	NaN	NaN	NaN	NaN	NaN	NaN	NaN	NaN
1	NaN	N0E4B7;A0A0G2KA61;A0A096MJD3;Q68G11;P67874;A0A096MKB7	Casein kinase II subunit beta	Csnk2b-Ly6g5b;Csnk2b	3	17.431	714230000	6	NaN	NaN	NaN	NaN	NaN	NaN	NaN	NaN	NaN	NaN	NaN	NaN	NaN	NaN	NaN	NaN	NaN	NaN	23.8832	NaN	NaN	NaN	NaN	NaN	NaN	NaN	NaN	NaN	NaN	NaN	NaN	NaN	NaN	NaN	NaN	NaN	NaN	NaN	NaN	NaN	NaN
1	NaN	A0A096MJI4		Gigyf2	1	64.047	54043000	13	NaN	NaN	NaN	NaN	NaN	NaN	NaN	NaN	NaN	NaN	NaN	NaN	NaN	NaN	NaN	NaN	NaN	NaN	NaN	NaN	NaN	NaN	NaN	NaN	NaN	NaN	NaN	NaN	NaN	NaN	NaN	NaN	NaN	NaN	NaN	NaN	NaN	NaN	NaN	NaN	NaN
1	NaN	A0A096MJJ6;B1H213;M0R9S4;A0A0G2K3Z5;A0FKI7	Acyl-CoA-binding domain-containing protein 5	Acbd5;LOC100910957	1	52.389	110740000	25	NaN	NaN	NaN	NaN	NaN	NaN	NaN	NaN	NaN	NaN	NaN	NaN	NaN	NaN	NaN	NaN	NaN	NaN	NaN	NaN	NaN	NaN	NaN	NaN	NaN	NaN	NaN	NaN	NaN	NaN	NaN	NaN	NaN	NaN	NaN	NaN	NaN	NaN	NaN	NaN	NaN
0.905363	-0.0116502	A0A096MK75;A0A096MJM1;Q32PX6		Rhog	7	19.872	862330000	176	23.5153	23.9998	23.6743	23.7553	23.4372	23.4007	23.4594	23.5782	23.6603	23.1828	23.2998	23.0203	23.5092	23.8702	23.3077	24.3639	24.6175	25.3058	23.7663	23.3655	23.8416	23.6419	23.9173	23.876	23.761	23.4636	23.4902	23.4009	23.4189	23.4428	24.0063	24.1063	23.6912	23.4373	23.3239	23.4264	23.7041	23.7563	23.7423	23.4626	23.335
0.539587	-0.0593432	A0A096MJP9;Q4V8J5		Ddi2	3	106.03	258230000	39	NaN	21.6033	21.4228	21.2715	NaN	21.413	21.7201	21.6067	21.7107	22.5905	22.2162	22.092	21.8154	22.0521	21.8114	NaN	NaN	NaN	NaN	22.1034	22.3229	22.1068	21.301	21.8221	22.2599	21.6784	21.992	21.1754	21.0784	21.3128	21.7683	21.8393	21.6921	21.8856	21.8545	21.7675	22.0786	22.2284	21.9057	21.6841	21.6852
1	NaN	A0A096MJR6		Parp4	5	89.891	164300000	52	NaN	NaN	22.7586	NaN	NaN	NaN	NaN	NaN	NaN	NaN	NaN	NaN	NaN	NaN	NaN	NaN	NaN	NaN	NaN	NaN	NaN	23.2181	22.8487	22.6103	NaN	NaN	NaN	NaN	NaN	NaN	NaN	NaN	NaN	22.6248	NaN	NaN	NaN	NaN	NaN	22.9928	NaN
1	NaN	A0A096MJX9;Q6MG75		Nelfe	2	19.52	3220500	4	NaN	NaN	NaN	NaN	NaN	NaN	NaN	NaN	NaN	NaN	NaN	20.8171	NaN	NaN	NaN	NaN	NaN	NaN	NaN	NaN	NaN	NaN	NaN	NaN	NaN	NaN	NaN	NaN	NaN	NaN	NaN	NaN	NaN	NaN	NaN	NaN	NaN	NaN	NaN	NaN	NaN
0.155501	-0.874229	A0A096MJY6		Gbe1	3	47.164	196970000	38	NaN	NaN	NaN	NaN	NaN	NaN	21.3593	NaN	21.7135	NaN	21.7251	21.6912	21.1866	21.2109	NaN	NaN	NaN	NaN	23.6023	23.6606	22.4772	NaN	NaN	21.6515	NaN	NaN	NaN	NaN	NaN	NaN	22.4174	NaN	NaN	21.9998	22.0459	21.8292	NaN	NaN	21.8545	NaN	NaN
1	-0.334197	A0A096MJZ2;M0RCS2		Tbl2	4	49.613	83306000	32	NaN	NaN	NaN	NaN	NaN	21.3797	21.1365	NaN	NaN	NaN	NaN	NaN	NaN	NaN	21.0956	NaN	NaN	NaN	NaN	22.0319	NaN	21.2987	21.4927	NaN	NaN	NaN	NaN	21.3693	NaN	NaN	21.2997	NaN	21.2513	NaN	NaN	NaN	NaN	NaN	NaN	21.2192	NaN
0.115213	0.0525998	A0A1W2Q6E9;A0A096MK30;O35763;T1SRT4;A0A0G2K095	Moesin	Msn	53	67.651	28032000000	1591	28.6218	28.6505	28.6511	28.5383	28.7267	28.5653	28.5611	28.5406	28.5683	28.6534	28.6022	28.5591	28.6485	28.6308	28.6096	28.9845	28.91	28.578	28.5808	28.5125	28.4959	28.396	28.3714	28.3873	28.5433	28.6388	28.6783	28.5233	28.39	28.4699	28.5342	28.5222	28.589	28.6424	28.7197	28.6889	28.8303	28.7571	28.8124	28.4909	28.4708
1	NaN	A0A096MKC6;Q9QWQ2;Q9JJI4;Q9JJI0;Q9JJH9;Q8K1Q7;Q8K1Q6;Q63025;Q63024;F8WFF8;F7FIH7;F7ET54;A0A096MK41;P02761	Major urinary protein;15.5 kDa fatty acid-binding protein	LOC100909412;LOC259246;RGD1566134;LOC298111;LOC298116;LOC688457	1	8.5318	28932000	5	NaN	NaN	NaN	NaN	NaN	NaN	NaN	NaN	NaN	NaN	NaN	NaN	NaN	NaN	NaN	NaN	NaN	NaN	NaN	NaN	NaN	NaN	NaN	NaN	NaN	NaN	NaN	NaN	NaN	NaN	NaN	NaN	NaN	NaN	NaN	NaN	NaN	NaN	NaN	NaN	NaN
0.447487	-0.178896	A0A096MK54		Synm	3	140.76	733100000	136	23.9096	23.4767	23.8296	23.8784	23.9559	24.0789	23.641	NaN	NaN	23.4959	NaN	23.3616	NaN	NaN	23.507	NaN	NaN	NaN	NaN	NaN	NaN	NaN	23.279	23.0467	NaN	NaN	NaN	24.359	NaN	24.4367	NaN	NaN	NaN	23.7904	24.0346	24.0395	22.9052	23.1843	23.0428	NaN	NaN
0.787645	0.0450212	A0A096MK58;A0A096MK83;O70454	Protein BUD31 homolog	Bud31	3	9.8313	103110000	29	NaN	NaN	NaN	NaN	NaN	NaN	NaN	NaN	NaN	NaN	NaN	NaN	20.8051	NaN	20.7754	NaN	NaN	NaN	NaN	NaN	21.3264	NaN	21.2206	NaN	21.1972	NaN	NaN	NaN	NaN	NaN	NaN	20.7652	NaN	NaN	NaN	NaN	NaN	21.0002	NaN	NaN	NaN
0.24775	-0.26849	A0A096MK73;P13668	Stathmin	Stmn1	7	14.637	783710000	71	23.7185	23.9065	23.5299	NaN	NaN	23.4459	NaN	22.7204	23.0264	24.0296	23.4569	23.5103	22.7628	22.6017	23.1701	NaN	NaN	NaN	23.74	NaN	NaN	23.8978	24.2091	24.0915	NaN	NaN	NaN	NaN	NaN	NaN	NaN	NaN	NaN	23.4428	23.3832	23.4605	23.3456	23.4259	23.3573	NaN	NaN
1	NaN	A0A096MK98;F1LX81;A0A096MJ26;A0A096MK60		Slfn5	3	101.05	380350000	8	NaN	NaN	NaN	NaN	NaN	NaN	NaN	NaN	NaN	NaN	NaN	NaN	NaN	NaN	NaN	NaN	NaN	NaN	NaN	NaN	NaN	NaN	NaN	NaN	NaN	NaN	NaN	NaN	NaN	NaN	NaN	NaN	NaN	NaN	NaN	NaN	NaN	NaN	NaN	NaN	NaN
0.555684	-0.0589501	D4A719;A0A096MKE2;A0A096MKG7		Snx12	8	19.807	1012700000	84	23.9048	24.0964	23.5238	24.2586	24.0949	24.1631	23.6655	23.6813	23.7379	23.9381	22.7541	23.579	23.5457	23.4387	23.703	23.5937	23.8033	24.9548	23.8508	23.8133	24.0126	23.5912	23.4772	23.4367	24.1458	24.5554	23.5399	23.9	24.2708	23.8802	NaN	23.9332	NaN	23.7011	23.767	23.7815	23.7189	23.8705	23.8877	23.6256	23.7447
1	NaN	A0A096MKG5;Q1HCL7	NAD kinase 2, mitochondrial	Nadk2	1	50.654	3327400	5	NaN	NaN	NaN	NaN	NaN	NaN	NaN	NaN	NaN	NaN	NaN	NaN	NaN	NaN	NaN	NaN	NaN	NaN	NaN	NaN	NaN	NaN	NaN	NaN	NaN	NaN	NaN	NaN	NaN	NaN	NaN	NaN	NaN	NaN	NaN	NaN	NaN	NaN	NaN	NaN	NaN
0.334245	-0.0776695	A0A096MKH2;Q4KM55		Vta1	5	33.975	1030100000	110	23.8712	24.0074	23.6863	24.1926	24.0439	24.0355	24.0051	23.7945	23.6079	23.7181	23.82	23.9454	23.9947	23.8844	23.8797	24.4148	24.5209	24.3561	24.0171	23.9634	24.4947	23.5577	23.7208	23.5206	23.8537	23.8014	23.9779	24.1304	24.1109	23.9215	24.4468	NaN	24.2858	23.6742	23.767	23.7271	23.8016	23.9634	23.9266	23.7219	23.8146
0.726608	-0.0392361	A0A096P6L8;F1LST1;P04937;Q6LC76;P97624	Fibronectin;Anastellin	Fn1	53	272.44	10726000000	1077	27.298	27.2715	27.1867	27.615	27.6462	27.628	26.9477	26.8686	26.931	27.2585	27.3234	27.245	27.2084	27.1814	27.204	27.6326	27.7469	27.6933	26.748	26.7487	26.9302	26.9272	26.931	26.9761	27.1097	27.1436	27.1315	27.4914	27.3281	27.5195	26.8376	26.606	26.6608	26.9135	26.9229	26.9572	26.4533	26.5908	26.5935	27.1441	27.0876
1	NaN	Q8SEZ2;Q8M7G4;Q7H115;I6V4L9;A0A096XKT2;P05505	Cytochrome c oxidase subunit 3	Mt-cox3;COX3;Mtco3	1	29.869	164400000	26	NaN	NaN	NaN	NaN	NaN	NaN	NaN	NaN	NaN	NaN	NaN	NaN	NaN	NaN	NaN	NaN	NaN	NaN	NaN	19.5667	NaN	22.3891	23.8643	23.788	NaN	NaN	NaN	NaN	NaN	NaN	20.4701	20.542	NaN	NaN	NaN	NaN	NaN	NaN	NaN	20.4869	20.5742
0.0548351	-0.307692	Q8SEZ0;Q06QK5;Q06QG6;Q06QA1;A0A096XKT9;P11661;A7XYD5;A7XYC1;A0A0A1FZN8	NADH-ubiquinone oxidoreductase chain 5	Mt-nd5;ND5;Mtnd5;Nd5	3	68.617	595560000	88	NaN	22.6723	23.4685	23.1452	23.2357	22.8108	23.5274	23.5388	23.4175	23.068	23.5173	23.129	23.1613	23.0065	23.2054	23.59	23.6738	23.5725	NaN	NaN	23.4772	23.629	NaN	NaN	NaN	22.6849	22.8699	23.5291	22.6944	23.0062	NaN	NaN	NaN	24.1009	23.7359	23.4544	NaN	23.0044	22.9169	22.9089	22.9083
0.441001	0.0909814	A0A097BVJ5;P13233	2,3-cyclic-nucleotide 3-phosphodiesterase	Cnp	6	44.856	540080000	63	22.8456	22.8174	22.7496	22.2179	22.2713	22.1805	22.7963	22.6492	22.6345	22.4342	23.0296	22.878	22.8242	23.4635	23.2967	NaN	NaN	NaN	22.4854	23.2096	22.8576	22.7529	22.9779	22.7523	23.47	23.5264	23.4882	23.0308	22.98	22.4662	23.5222	NaN	22.7071	23.0608	23.1278	23.2626	22.8888	23.1963	23.1251	22.6455	22.507
0.0223271	-0.227824	A0A097BW25;CON__Q2KJC7		Postn	55	87.152	62508000000	2366	29.6006	29.555	29.6568	29.8356	29.8767	29.8567	29.5769	29.6344	29.6884	29.653	29.7015	29.7379	29.1961	29.2333	29.2858	29.9167	29.7907	30.0477	29.5768	29.61	29.6172	29.7245	29.782	29.7621	29.5694	29.4723	29.4613	29.9441	29.9296	29.9268	29.4542	29.4772	29.4191	29.5383	29.4906	29.5662	29.589	29.7031	29.6654	29.9584	29.9038
1	NaN	A0A0A0MXU4;B0BNG0	ER membrane protein complex subunit 2	Emc2	2	34.513	102370000	32	NaN	NaN	NaN	NaN	NaN	NaN	NaN	NaN	NaN	NaN	NaN	NaN	NaN	NaN	NaN	NaN	NaN	NaN	NaN	NaN	NaN	NaN	NaN	NaN	NaN	NaN	NaN	NaN	NaN	NaN	NaN	NaN	NaN	NaN	NaN	NaN	NaN	NaN	NaN	NaN	NaN
0.0099461	0.304442	A0A0A0MXV3;P97586	Cell growth regulator with EF hand domain protein 1	Cgref1	5	35.321	215530000	51	22.1917	NaN	NaN	21.5591	NaN	21.6825	22.1766	NaN	21.9768	NaN	NaN	NaN	22.2663	22.3598	22.6699	NaN	NaN	NaN	NaN	NaN	NaN	22.182	22.0875	22.0087	NaN	NaN	NaN	21.1446	NaN	NaN	NaN	22.0285	NaN	21.9306	NaN	21.7478	22.1917	22.5375	22.1523	NaN	21.6134
0.0264524	-0.294063	A0A0A0MXW3;D4AEC0;P0C0S7;M0R6X5	Histone H2A;Histone H2A.Z	H2afz;H2afv	6	13.421	4030700000	176	26.1645	26.3197	26.3346	26.2047	25.7397	26.0679	25.6916	25.6203	25.8406	26.0341	25.8534	25.7699	25.9083	25.9745	25.7794	24.9752	25.9391	25.8872	26.3784	26.4346	26.4841	25.8187	25.9077	25.9873	26.0024	25.6741	25.285	26.0524	25.9287	26.1955	26.4384	26.4026	26.3048	25.9339	NaN	25.4917	25.4357	25.5291	25.6297	25.6484	25.8189
1	NaN	A0A0A0MXX5;D4A1J4	3-hydroxybutyrate dehydrogenase type 2	Bdh2	2	27.678	21174000	1	NaN	NaN	NaN	NaN	NaN	NaN	NaN	NaN	NaN	NaN	NaN	NaN	NaN	NaN	NaN	NaN	NaN	NaN	NaN	NaN	NaN	NaN	NaN	NaN	NaN	NaN	NaN	NaN	NaN	NaN	NaN	NaN	NaN	NaN	NaN	NaN	NaN	NaN	NaN	NaN	NaN
1	NaN	A0A0A0MXY4;A0A1W2Q676;A0A0G2JU73;F1LP64;Q3KR60	E3 ubiquitin-protein ligase TRIP12	Trip12	2	218.1	32798000	18	NaN	NaN	NaN	NaN	NaN	NaN	NaN	NaN	NaN	NaN	NaN	NaN	NaN	NaN	NaN	NaN	NaN	NaN	NaN	NaN	NaN	NaN	NaN	NaN	NaN	NaN	NaN	NaN	NaN	NaN	NaN	NaN	NaN	NaN	NaN	NaN	NaN	NaN	NaN	NaN	20.1272
1	NaN	A0A0A0MXZ3;B2GV75;P84850	D-2-hydroxyglutarate dehydrogenase, mitochondrial	D2hgdh	1	57.74	0	2	NaN	NaN	NaN	NaN	NaN	NaN	NaN	NaN	NaN	NaN	NaN	NaN	NaN	NaN	NaN	NaN	NaN	NaN	NaN	NaN	NaN	NaN	NaN	NaN	NaN	NaN	NaN	NaN	NaN	NaN	NaN	NaN	NaN	NaN	NaN	NaN	NaN	NaN	NaN	NaN	NaN
1	-0.374805	A0A0A0MY00;P70584	Short/branched chain specific acyl-CoA dehydrogenase, mitochondrial	Acadsb	2	52.042	277660000	23	NaN	NaN	NaN	NaN	NaN	NaN	NaN	23.2627	22.9365	NaN	22.7969	22.6179	NaN	NaN	22.7724	NaN	NaN	NaN	23.186	23.2236	23.1571	NaN	NaN	NaN	NaN	NaN	NaN	NaN	NaN	NaN	NaN	NaN	NaN	NaN	NaN	NaN	NaN	NaN	NaN	NaN	NaN
0.277087	0.50915	A0A0A0MY01;P02693	Fatty acid-binding protein, intestinal	Fabp2	3	15.225	89045000	28	22.1372	NaN	22.3005	NaN	NaN	NaN	21.8503	21.8274	NaN	NaN	NaN	NaN	NaN	NaN	NaN	NaN	NaN	NaN	NaN	NaN	NaN	NaN	NaN	NaN	NaN	21.566	NaN	21.3636	21.5832	21.3408	NaN	NaN	NaN	NaN	NaN	NaN	NaN	NaN	NaN	NaN	NaN
0.731239	-0.0259315	Q9R085;A0A0A0MY07;A0A0G2K1U1	Ubiquitin carboxyl-terminal hydrolase 15;Ubiquitin carboxyl-terminal hydrolase	Usp15	12	109.25	822980000	48	23.3464	23.6795	23.2258	23.3688	23.5003	23.5058	23.6595	NaN	23.3588	23.1778	23.4322	23.5298	23.4397	23.4753	23.579	NaN	NaN	NaN	23.3322	NaN	NaN	23.6208	23.5538	22.9855	23.4748	23.9483	23.7499	23.6237	NaN	23.554	NaN	NaN	NaN	23.5937	NaN	23.2964	23.4178	23.8279	23.4575	23.5167	23.2915
0.000494839	-0.103813	Q66HD0;A0A0A0MY09;A0A0G2K4I4	Endoplasmin	Hsp90b1	62	92.77	70949000000	2575	29.9331	29.9144	29.8862	30.0804	30.1161	30.0898	29.8522	29.888	29.9287	29.837	29.9163	29.8415	29.908	29.9265	29.9306	29.7643	29.6097	29.933	29.9484	30.0178	30.0153	29.8372	29.8693	29.8719	29.7371	29.7712	29.8271	29.7627	29.8286	29.8293	30.058	30.0515	30.0111	29.8799	29.8425	29.8427	29.8803	29.9002	29.8869	29.9698	29.9963
1	NaN	A0A0A0MY11;F1LMN3	Transcription factor E2F8	E2f8	1	94.593	118990000	6	NaN	NaN	NaN	NaN	NaN	NaN	NaN	NaN	NaN	NaN	NaN	NaN	NaN	NaN	NaN	NaN	NaN	NaN	NaN	NaN	NaN	NaN	NaN	NaN	NaN	NaN	NaN	NaN	NaN	NaN	NaN	NaN	NaN	NaN	NaN	NaN	NaN	NaN	NaN	NaN	NaN
0.672765	-0.0277841	A0A0A0MY22;P82450	Sialate O-acetylesterase;Sialate O-acetylesterase small subunit;Sialate O-acetylesterase large subunit	Siae	5	60.508	552120000	71	23.3277	23.2888	23.3192	22.5428	22.2116	22.5976	23.2727	23.2455	23.1783	23.0409	23.0912	23.4914	22.9748	22.9391	22.8361	NaN	NaN	NaN	22.8883	NaN	NaN	23.262	23.1685	23.2299	23.2807	23.1586	23.3625	22.5031	22.2916	22.6086	NaN	NaN	NaN	22.8985	22.7189	23.1285	23.0773	23.1782	23.007	22.512	22.4352
1	NaN	A0A0G2KAH9;A0A0A0MY31;F1LQX8;C7E1V2;F1LNT1;P29994;Q5BJS8	Inositol 1,4,5-trisphosphate receptor type 1	Itpr1	5	293.63	136470000	8	NaN	NaN	NaN	23.5176	NaN	23.6625	NaN	NaN	NaN	NaN	NaN	NaN	NaN	NaN	NaN	NaN	NaN	NaN	NaN	NaN	NaN	NaN	NaN	NaN	NaN	NaN	NaN	NaN	NaN	NaN	NaN	NaN	NaN	NaN	NaN	NaN	NaN	NaN	NaN	NaN	NaN
0.89906	-0.00558357	A0A0A0MY48;A0A0A0MY49;P39052;Q7M077	Dynamin-2	Dnm2	35	97.253	5916400000	489	26.337	26.2651	26.1391	26.4882	26.9302	26.6378	26.4119	26.5943	26.2962	26.4279	26.5154	26.4039	26.3932	26.3764	26.3705	26.0959	26.8158	26.5314	26.4618	26.4174	26.5704	26.3552	26.2311	26.2954	26.4135	26.4223	26.4385	26.3304	26.4304	26.4485	26.3534	26.1908	26.297	26.2669	26.321	26.2262	26.2544	26.4004	26.3118	26.402	26.4029
1	NaN	Q95938;Q8SEZ6;Q8HIC9;Q06QK0;Q06QA9;A0A0A1FZ34;P05503;D6QSE9;B3Y997;A4UIA7	Cytochrome c oxidase subunit 1	Mt-co1;COI;CO1;COX1;Mtco1	2	56.977	192790000	10	NaN	NaN	NaN	NaN	NaN	NaN	NaN	NaN	NaN	NaN	NaN	NaN	NaN	NaN	NaN	NaN	NaN	NaN	NaN	NaN	NaN	NaN	NaN	NaN	NaN	NaN	NaN	NaN	NaN	NaN	NaN	NaN	NaN	NaN	NaN	NaN	NaN	NaN	NaN	NaN	NaN
1	NaN	Q8SEZ1;Q06QG9;A0A0A1FZ38;P05506	NADH-ubiquinone oxidoreductase chain 3	Mt-nd3;ND3;Mtnd3	1	13.086	207290000	40	NaN	NaN	NaN	NaN	NaN	NaN	NaN	NaN	NaN	NaN	NaN	NaN	NaN	NaN	NaN	NaN	NaN	NaN	NaN	NaN	NaN	NaN	NaN	NaN	NaN	NaN	NaN	NaN	NaN	NaN	NaN	NaN	NaN	NaN	NaN	NaN	NaN	NaN	NaN	NaN	NaN
1	NaN	Q9Z1J7;A0A0F7R4W9;D3ZJ25	Amino acid transporter	Slc1a5	3	56.755	59403000	12	NaN	22.8638	NaN	NaN	NaN	NaN	NaN	NaN	NaN	NaN	NaN	NaN	NaN	NaN	NaN	NaN	NaN	NaN	NaN	NaN	NaN	NaN	NaN	NaN	NaN	NaN	NaN	NaN	NaN	NaN	NaN	NaN	NaN	NaN	NaN	NaN	NaN	NaN	NaN	NaN	NaN
0.270968	0.165751	D3ZE63;A0A0F7RQL3;P30904;D4A3P7;F1LTZ6	Macrophage migration inhibitory factor	LOC679748;Mif;RGD1560513	4	12.605	4659100000	169	26.3198	26.289	26.477	26.3076	26.4872	26.3933	25.9724	26.2928	26.07	26.1848	26.1307	26.0949	26.0337	26.237	25.9431	NaN	NaN	NaN	25.1277	25.1648	25.61	26.1079	26.1523	26.1423	25.8836	25.8751	26.002	26.1128	25.9163	26.1593	25.5019	26.3665	26.3549	25.9143	25.7197	25.9319	25.2498	25.3527	25.2174	25.741	25.5155
0.0016647	0.136488	A0A0G2JSG6;P29410	Adenylate kinase 2, mitochondrial;Adenylate kinase 2, mitochondrial, N-terminally processed	Ak2	22	25.529	8440800000	712	26.9477	26.9679	26.9	26.8948	26.747	26.7121	26.7634	26.7693	26.8479	26.7005	26.7516	26.7436	26.9832	26.9842	26.9968	27.2816	27.4443	27.5352	26.9497	26.9021	26.9092	26.9291	27.016	26.8741	27.0019	26.9697	26.8617	26.6874	26.7803	26.8226	26.982	27.0529	26.988	26.8328	26.8756	26.7375	26.9913	27.0145	27.0403	26.6326	26.6847
0.1962	-0.114719	A0A0G2JSH2;P29147	D-beta-hydroxybutyrate dehydrogenase, mitochondrial	Bdh1	19	38.333	8993000000	602	26.946	26.8701	26.8776	27.5933	27.6438	27.7056	27.0935	27.1707	27.1639	26.9324	26.8071	26.822	26.8564	26.8488	26.9243	25.4464	25.7206	25.7366	27.3361	27.3776	27.273	27.3011	27.1194	27.1135	26.5648	26.5729	26.6724	27.1296	27.0573	27.0571	27.1807	27.0777	27.1215	26.9524	27.0683	26.9713	26.9509	26.9264	27.0253	27.298	27.1909
0.270804	-0.0851931	A0A0G2KB98;A0A0G2JSH4;P18266	Glycogen synthase kinase-3 beta	Gsk3b	5	48.01	647640000	126	22.9315	22.9235	22.8923	23.4018	23.0301	23.3313	22.9596	23.0917	23.3659	23.0204	23.3476	23.521	22.961	22.9224	23.3328	23.1181	24.0503	NaN	22.9164	23.4389	23.1397	23.3016	23.0967	23.017	23.3446	23.2239	23.4068	23.1796	23.2832	22.8831	22.9037	23.2864	NaN	23.3574	23.2261	23.2862	23.0264	NaN	22.9288	NaN	23.2399
0.0169964	-0.0943811	A0A0G2JSH9;P35704	Peroxiredoxin-2	Prdx2	16	21.797	26497000000	952	28.5838	28.5533	28.5676	28.7048	28.5639	28.6795	28.6483	28.6049	28.7362	28.4286	28.3485	28.4657	28.5281	28.543	28.5115	27.2799	27.6	27.4666	28.6	28.6583	28.5437	28.285	28.2422	28.2332	28.6979	28.7412	28.6714	28.6774	28.7682	28.676	28.5149	28.5038	28.4796	28.2764	28.4401	28.4345	28.4301	28.4129	28.449	28.6372	28.6508
0.0642871	-0.103222	A0A0G2JSI1;Q9JLJ3	4-trimethylaminobutyraldehyde dehydrogenase	Aldh9a1	45	54.05	28805000000	1527	28.6028	28.5958	28.6505	28.8841	28.8922	28.7721	28.5936	28.6215	28.6824	28.729	28.701	28.729	28.6344	28.6149	28.6241	28.6725	28.4267	28.493	29.0305	29.0113	29.0468	28.6771	28.5912	28.6524	28.5527	28.7139	28.6934	28.7037	28.7107	28.8137	28.9869	28.9852	28.8067	28.5789	28.5809	28.5539	28.7482	28.6901	28.7097	28.7632	28.6606
0.286399	-0.0904139	A0A0G2JSJ8;P17164	Tissue alpha-L-fucosidase	Fuca1	6	53.472	1618000000	130	24.4639	24.6832	24.5301	24.8399	24.5042	24.3832	24.4948	24.6797	24.6266	24.306	24.1577	24.4516	NaN	24.1462	24.5003	NaN	NaN	NaN	25.2796	24.7128	24.7737	24.6826	24.5525	24.314	24.611	NaN	24.4523	25.2443	25.0378	25.1665	24.7343	24.2635	24.5416	24.0854	24.1294	24.1763	24.8413	24.3126	24.7566	NaN	NaN
0.183102	-0.103031	A0A0G2JSK1			14	46.477	7019600000	512	26.843	26.7967	26.8035	26.2238	26.4125	26.2586	26.9663	26.9024	26.8291	26.7326	26.7152	26.6486	26.6901	26.66	26.6984	25.7767	25.9095	25.8145	26.4818	26.4762	26.3798	26.0387	26.0645	26.0062	26.9205	26.8096	26.7201	26.7837	26.7268	26.6211	26.4764	26.7861	26.8192	26.3949	26.382	26.4349	26.4624	26.2524	26.4254	26.6068	26.6204
0.275997	0.0952029	A0A0G2JSL0;P28073	Proteasome subunit beta type-6	Psmb6	7	25.303	1524100000	117	24.8058	24.7061	24.8067	22.8231	23.7136	23.5228	24.4004	24.357	24.3125	24.5109	24.4625	24.5034	23.8458	24.2382	24.4859	24.0223	24.1486	24.666	24.1327	24.3651	24.5094	24.3429	24.1437	24.0169	24.5564	24.716	24.2752	24.4705	23.758	23.8006	24.5083	24.6816	24.865	24.0926	24.2708	24.1948	24.6331	24.7183	24.4869	24.1499	24.3731
1	NaN	A0A0G2JX69;A0A0G2JSL2;Q69BT7	Trafficking protein particle complex subunit 4	Trappc4	2	22.699	30187000	2	NaN	NaN	NaN	NaN	NaN	NaN	NaN	NaN	NaN	NaN	NaN	NaN	NaN	NaN	NaN	NaN	NaN	NaN	NaN	NaN	NaN	NaN	21.3764	NaN	NaN	NaN	NaN	NaN	NaN	NaN	NaN	NaN	NaN	NaN	NaN	NaN	NaN	NaN	NaN	NaN	NaN
0.0539577	-0.101286	A0A0G2JSL8;A0A0G2K6X9;Q64640	Adenosine kinase	Adk	27	40.132	15796000000	915	27.62	27.5246	27.5705	27.548	27.6319	27.6248	27.7814	27.8215	27.7087	27.7683	27.7895	27.8224	27.7279	27.7416	27.7033	28.0851	28.3066	28.5245	28.117	28.0146	28.0508	27.5322	27.6489	27.5769	27.8037	27.9781	27.8562	27.5914	27.5464	27.6501	27.8577	27.9694	27.9038	27.5712	27.6359	27.6179	27.8503	27.833	27.8916	27.471	27.4383
1	NaN	A0A0G2JSM1;A0A0G2K953;Q8VHV8	Selenoprotein S	Vimp	1	21.115	19864000	3	NaN	NaN	NaN	NaN	NaN	NaN	NaN	NaN	NaN	NaN	NaN	NaN	NaN	NaN	NaN	NaN	NaN	NaN	NaN	NaN	NaN	NaN	NaN	NaN	NaN	NaN	NaN	NaN	NaN	NaN	NaN	NaN	NaN	NaN	NaN	NaN	NaN	NaN	NaN	NaN	NaN
0.853466	0.0182832	A0A0G2JSM3;D3ZFR7;A0A0G2K9W2;Q66HS7	PDZ and LIM domain protein 3	Pdlim3	25	34.417	23281000000	1032	28.0116	28.043	28.0068	28.3872	28.5433	28.4953	28.2095	28.1967	28.2443	28.313	28.3006	28.2552	28.1413	28.1537	28.1606	28.7249	28.5539	28.7114	27.9311	27.8987	28.0149	28.0015	27.9665	27.9517	28.4122	28.2362	28.2441	28.3345	28.3588	28.4038	27.7664	27.6914	27.6477	28.3766	28.4296	28.4172	28.1083	28.0621	28.2159	28.2741	28.2695
1	NaN	A0A0G2JSM4;O35152	BET1-like protein	Bet1l	2	12.41	0	2	NaN	NaN	NaN	NaN	NaN	NaN	NaN	NaN	NaN	NaN	NaN	NaN	NaN	NaN	NaN	NaN	NaN	NaN	NaN	NaN	NaN	NaN	NaN	NaN	NaN	NaN	NaN	NaN	NaN	NaN	NaN	NaN	NaN	NaN	NaN	NaN	NaN	NaN	NaN	NaN	NaN
0.105992	-0.0621248	A0A0G2JSM7;Q63028;D3ZZ99;F8WFS9;Q05764	Alpha-adducin	Add1	26	80.338	4019400000	442	25.5365	25.6836	25.6723	25.8986	25.9098	25.7665	25.8772	25.8636	25.8901	25.8231	25.9444	25.9321	25.8394	25.6748	25.7623	25.6782	26.1272	25.7884	25.8565	25.9083	25.9063	25.7809	25.7377	25.8491	25.7649	25.7311	25.7652	25.9167	25.9353	25.969	25.6029	25.6756	25.5904	25.6364	25.5541	25.6207	25.5933	25.6909	25.7567	25.7902	25.8692
0.726304	-0.0250031	A0A0G2JSP3;B5DF89	Cullin-3	Cul3	11	86.467	1115000000	113	24.002	23.9291	23.843	24.1483	24.501	24.4654	24.1875	23.8954	23.684	23.6168	23.6109	23.7669	24.1687	23.7091	23.5433	NaN	NaN	NaN	NaN	24.17	23.8789	23.7629	23.7204	24.2062	24.2658	23.8578	24.1067	23.9623	24.2252	24.217	24.0768	24.2585	23.9258	23.6898	23.9633	23.7224	23.9824	23.7136	24.0918	24.2881	24.2036
0.433952	0.0641715	A0A0G2JSP8;P00564	Creatine kinase M-type	Ckm	14	43.018	3859200000	437	25.8173	25.762	25.8059	25.8952	25.7705	25.905	25.5688	25.6007	25.6784	25.1824	25.1537	25.2736	25.6423	25.5368	25.6617	24.5327	24.5612	25.1493	25.3392	25.4907	25.7561	25.5566	25.5976	25.6223	25.9968	26.0197	25.8548	26.1709	25.9957	26.1873	25.3909	25.3304	25.6276	25.6315	25.643	25.7809	25.7478	25.7277	25.6421	26.0716	26.1785
0.00051197	0.248759	A0A0G2JSQ4;Q91XN7		Tpm1	7	28.556	2078100000	204	25.1339	25.2001	25.1143	23.7817	24.1092	23.6185	24.9147	25.0895	24.9943	25.0133	25.0721	25.0361	25.0064	24.9339	25.0418	25.1852	25.4082	25.3398	24.4935	24.6011	24.5638	25.1706	25.2129	25.0585	25.1546	25.1332	25.0481	23.5225	23.9905	23.6756	24.8721	25.0332	25.1537	24.94	24.9274	24.9718	24.8493	24.9943	25.0177	24.1164	24.0223
0.898044	0.0339104	Q6P7A6;A0A0G2JSQ6;P97588;B1WBR0;Q9R1V3;Q206L0;Q6IRI8	Mothers against decapentaplegic homolog;Mothers against decapentaplegic homolog 1;Mothers against decapentaplegic homolog 5	Smad1;Smad5	3	52.532	270950000	39	NaN	22.1563	NaN	NaN	NaN	NaN	NaN	22.291	NaN	22.0213	22.676	NaN	NaN	NaN	NaN	NaN	23.4175	NaN	NaN	NaN	22.5531	NaN	22.282	NaN	NaN	NaN	NaN	NaN	NaN	NaN	NaN	NaN	NaN	NaN	21.9044	NaN	NaN	22.4569	NaN	NaN	NaN
1	0.229574	A0A1R3UCJ4;A0A0G2JSQ7;P00758	Kallikrein-1;Nerve growth factor gamma chain 1;Nerve growth factor gamma chain 2	Ngfg	3	31.779	509980000	42	NaN	NaN	24.3389	23.695	NaN	23.7374	NaN	NaN	24.0036	NaN	NaN	23.4042	NaN	NaN	NaN	NaN	NaN	NaN	NaN	NaN	NaN	NaN	NaN	NaN	NaN	NaN	NaN	NaN	NaN	NaN	NaN	NaN	NaN	NaN	NaN	NaN	24.2711	NaN	24.0895	NaN	NaN
1	NaN	A0A0G2JSQ9;Q56B11	Proline-, glutamic acid- and leucine-rich protein 1	Pelp1	2	124.21	41347000	11	NaN	NaN	NaN	NaN	NaN	NaN	NaN	NaN	NaN	NaN	NaN	NaN	NaN	NaN	NaN	NaN	NaN	NaN	NaN	NaN	NaN	NaN	NaN	NaN	NaN	NaN	NaN	NaN	NaN	NaN	NaN	NaN	NaN	NaN	NaN	NaN	NaN	NaN	NaN	NaN	NaN
0.111269	-0.120891	A0A0G2JSR0;Q9R1Z0	Voltage-dependent anion-selective channel protein 3	Vdac3	11	30.783	2819600000	205	24.9764	25.1776	25.2263	25.8815	25.9505	25.9047	25.4043	25.3351	25.4581	25.0175	24.9218	25.1482	25.3975	25.1801	25.353	25.2965	25.0992	25.0792	25.4729	25.479	25.404	25.6984	25.7272	25.6843	25.4597	25.1226	25.2579	25.6182	25.4985	25.4927	25.3381	25.4751	25.3795	25.6496	25.3692	25.4057	24.9307	24.9304	25.0699	25.4274	25.3786
0.0957675	0.199358	Q7TP14;A0A0G2JSR1;A0JPQ9	Chitinase domain-containing protein 1	Chid1	7	62.864	563450000	46	23.4423	23.3457	22.8072	23.8064	NaN	23.091	23.1061	NaN	22.9669	22.961	22.7657	22.99	23.3496	23.3248	23.5995	NaN	NaN	NaN	23.035	23.8021	22.3545	NaN	23.4765	23.0676	23.0116	23.4301	23.0043	22.4906	NaN	22.9935	23.0747	23.1109	23.3608	23.5049	23.3957	23.5303	NaN	22.8563	23.1009	22.7713	22.9145
0.849059	-0.0155324	A0A0G2JXI4;A0A0G2JSR4;P52632	Signal transducer and activator of transcription 5B	Stat5b	7	86.974	239070000	31	22.4004	22.3052	22.4898	NaN	22.1095	21.9719	NaN	NaN	NaN	22.329	22.3658	NaN	22.4316	NaN	22.3248	NaN	NaN	NaN	NaN	22.1261	NaN	NaN	NaN	22.2587	NaN	NaN	NaN	NaN	NaN	NaN	NaN	22.2268	22.3403	22.2831	NaN	NaN	22.43	22.3884	NaN	NaN	NaN
0.0963773	0.0897677	A0A0G2JSR7;P43244;B5DEM0;Q6P6H1	Matrin-3	Matr3	19	94.501	4507800000	432	25.8131	25.5214	25.7064	25.8687	25.8503	25.8212	25.9553	25.8664	25.7844	25.9727	25.9624	25.9811	26.0251	26.1287	26.0642	26.6296	26.3257	26.3955	25.714	25.8011	25.7497	25.7305	25.8272	25.6579	26.0884	26.1908	26.0711	25.9833	25.8669	25.988	25.8873	26.0419	25.8176	25.9822	25.9368	25.673	26.0707	26.0263	25.9878	26.0273	25.9289
1	NaN	A0A0G2JSR9;Q91ZS3	45 kDa calcium-binding protein	Sdf4	2	44.321	318820000	3	NaN	NaN	NaN	NaN	NaN	NaN	NaN	NaN	NaN	NaN	NaN	NaN	NaN	NaN	NaN	NaN	NaN	NaN	NaN	NaN	NaN	NaN	NaN	NaN	NaN	NaN	NaN	21.9244	NaN	NaN	NaN	NaN	NaN	NaN	NaN	NaN	NaN	NaN	NaN	NaN	NaN
1	NaN	A0A0G2JSS1;Q9Z1Z6	Integrin-linked kinase-associated serine/threonine phosphatase 2C	Ilkap	3	42.718	99350000	2	NaN	NaN	NaN	NaN	NaN	NaN	NaN	NaN	NaN	NaN	NaN	NaN	NaN	NaN	NaN	NaN	NaN	NaN	NaN	NaN	NaN	NaN	NaN	NaN	NaN	NaN	NaN	NaN	NaN	NaN	NaN	NaN	NaN	NaN	NaN	NaN	NaN	NaN	NaN	NaN	NaN
1	NaN	A0A0G2JSS3;Q6AY78	Solute carrier family 22 member 18	Slc22a18	1	43.817	85546000	29	NaN	NaN	NaN	NaN	NaN	NaN	NaN	NaN	NaN	NaN	NaN	NaN	NaN	NaN	NaN	NaN	NaN	NaN	NaN	NaN	NaN	NaN	NaN	NaN	NaN	NaN	NaN	NaN	NaN	NaN	NaN	NaN	NaN	NaN	NaN	NaN	NaN	NaN	NaN	NaN	NaN
0.864841	0.0531208	O55025;A0A0G2JSS7;Q10984	Galactoside 2-alpha-L-fucosyltransferase 2	Fut2	3	39.738	211430000	23	NaN	NaN	NaN	NaN	NaN	NaN	22.432	NaN	NaN	NaN	NaN	NaN	NaN	22.8336	23.1885	NaN	NaN	NaN	NaN	NaN	NaN	23.0576	NaN	22.3382	NaN	NaN	NaN	NaN	NaN	NaN	23.4008	22.9815	23.1996	22.6495	NaN	NaN	NaN	NaN	NaN	NaN	NaN
0.281498	0.117186	A0A0G2JSS8;Q9R063	Peroxiredoxin-5, mitochondrial	Prdx5	18	22.206	23940000000	733	28.5056	28.6118	28.5545	28.7542	28.6016	28.5672	28.6193	28.5134	28.6038	28.3501	28.3669	28.4032	28.4805	28.5374	28.4516	27.2889	26.508	26.0906	28.1993	27.9799	28.0359	28.1943	28.304	28.2764	28.4112	28.2798	28.3681	28.4794	28.5203	28.5458	27.7351	27.7956	27.646	28.3012	28.2263	28.3427	28.1742	28.2774	28.4273	28.4382	28.5059
0.0062256	-0.184429	A0A0G2JSS9			14	60.249	3216500000	299	25.3168	25.2159	25.1327	26.0466	26.013	25.732	25.6295	25.6356	25.6099	25.235	25.2762	25.0692	25.3002	25.4086	25.2684	26.2629	26.075	25.7328	25.2739	25.3383	25.2985	25.0363	25.0929	25.0445	25.243	25.4234	25.2986	25.8461	25.816	25.8226	25.3073	25.5009	25.2854	25.5824	25.5556	25.4634	25.0263	24.8768	24.9609	25.7688	25.7213
0.109993	0.200047	B0BMV1;A0A0G2JSU3;D3ZC07;Q63945;Q6QI56;A0A0G2K5L9;D4A466;Q6UN82	Protein SET	Set;Pkn3;LOC317165	9	33.405	5071700000	237	26.1496	26.1472	25.9857	25.777	25.8407	25.9606	26.0045	26.0498	26.0044	26.2182	26.2358	26.1221	26.0261	26.2356	26.3073	23.8523	25.1979	NaN	25.5866	25.6104	25.4406	25.9102	26.0357	25.9199	26.5696	26.531	26.4932	26.0529	26.0345	25.913	25.7574	25.7004	25.8955	25.9004	26.0189	25.9886	25.9228	25.9541	25.8691	25.9861	26.0925
0.757337	-0.02515	A0A0G2JSU4;A0A0G2JSV0;Q8VBU2	Protein NDRG2	Ndrg2	12	39.255	2018700000	228	24.414	24.5738	24.2914	25.3621	25.3386	25.3959	24.6901	24.6659	24.6201	24.5946	24.6763	24.9382	24.9386	24.7546	24.7411	25.5352	25.5162	25.6097	24.4977	24.4232	24.5194	24.1555	24.1192	24.2515	24.745	24.586	24.4348	24.9212	24.9477	24.9234	24.4913	24.1792	24.291	24.7763	24.6824	25.091	24.839	24.5582	24.6505	24.6432	24.5523
0.777315	0.0501446	A0A0G2JSU8;P10633;Q5I0P9;P12939	Cytochrome P450 2D1;Cytochrome P450 2D10	Cyp2d1;Cyp2d5;Cyp2d10	4	57.141	353660000	19	22.4014	22.3775	22.1085	NaN	22.6181	22.8552	22.3244	22.3583	NaN	NaN	22.4528	NaN	NaN	22.5531	22.5827	NaN	NaN	NaN	NaN	NaN	NaN	22.304	NaN	22.4144	22.8962	NaN	NaN	22.4636	22.9263	22.5838	23.393	NaN	NaN	22.596	22.7045	22.4886	NaN	NaN	22.7984	22.3883	22.2063
0.157746	0.271759	A0A0G2JSV6;G3V8R3			2	15.284	11937000000	150	27.0064	27.3947	27.4742	26.2092	26.3067	26.2961	27.1184	27.128	27.2247	27.287	27.2986	27.3835	27.7511	27.7461	27.546	25.7365	25.556	25.6076	26.6458	26.5242	26.6518	27.309	27.5805	27.6041	27.0808	27.3504	27.464	26.4162	26.4771	26.5618	27.2212	27.1257	27.1232	27.5873	27.6608	27.6133	27.6759	27.8483	27.7343	27.5526	27.4937
0.885477	0.0291565	P18666;A0A0G2JSW0;Q63781	Myosin regulatory light chain 12B	Myl12b	6	19.838	12719000000	371	27.5591	27.4727	27.4543	28.0978	28.0975	27.976	27.1674	27.1337	27.2989	27.7007	27.5623	27.559	27.3514	27.4485	27.3305	27.9618	28.0822	27.9627	27.3834	27.5313	27.606	27.3602	27.5493	27.4485	27.6608	27.644	27.7087	28.0157	27.9985	27.9387	27.5728	27.3822	27.3313	27.3969	27.4343	27.4275	26.2141	25.9701	26.3705	27.8942	27.7826
1	NaN	A0A0G2JSW1;Q6QI25	ORM1-like protein 3	Ormdl3	1	20.178	48406000	34	NaN	NaN	NaN	NaN	NaN	NaN	NaN	NaN	NaN	NaN	NaN	NaN	NaN	NaN	NaN	NaN	NaN	NaN	NaN	NaN	NaN	NaN	NaN	NaN	NaN	NaN	NaN	NaN	NaN	NaN	NaN	NaN	NaN	NaN	NaN	NaN	NaN	NaN	NaN	NaN	NaN
8.07676e-05	0.243066	A0A0G2JSY2;F1LPH1;D3ZL24;P27321;O55155;D4A129	Calpastatin	Cast	21	73.155	3858600000	503	25.6418	25.5521	25.6477	25.4455	25.5067	25.357	25.5516	25.4882	25.5742	26.0129	25.9457	26.0436	25.857	25.7834	25.9044	25.5691	25.5042	26.0289	25.431	25.2318	25.2256	25.5898	25.5737	25.6141	25.6343	25.7098	25.7737	25.7213	25.7187	25.6804	25.525	25.254	25.6224	25.719	25.6079	25.6248	25.7122	25.7645	25.8301	25.7037	25.5831
0.991286	-0.000848116	A0A0G2JVK4;A0A0G2JSY3;P42676	Neurolysin, mitochondrial	Nln	10	77.801	986730000	84	23.8593	23.5727	23.6349	23.7796	24.0129	23.908	23.8236	23.9155	23.9143	23.9443	23.9105	23.6808	23.7543	23.7709	23.6195	NaN	NaN	NaN	24.1472	23.9473	23.5001	23.6597	23.72	23.8157	24.0851	23.9229	23.9813	23.8041	23.9035	23.829	24.1228	NaN	24.136	23.6907	23.6405	23.6854	24.0631	23.6757	23.9104	23.8008	24.091
0.0036688	-0.304963	Q03191;A0A0G2JSY6;A0A0G2K0R2	Trefoil factor 3	Tff3	2	8.9442	3645100000	138	25.5184	25.5334	25.4629	25.0488	25.3043	25.0028	25.5997	25.6968	25.985	25.3146	25.5176	25.6355	25.3491	25.3714	25.2236	NaN	24.253	24.276	25.9106	26.0209	26.3425	25.2274	25.403	25.178	25.7239	25.8434	25.9	25.5372	25.3663	25.5588	26.3228	26.2319	26.2523	25.4692	25.6364	25.553	26.0794	25.9284	26.1315	25.2307	25.0905
0.144504	-0.0997215	A0A0G2JSZ5;Q63081	Protein disulfide-isomerase A6	Pdia6	25	48.76	32961000000	1092	28.8281	28.7657	28.8012	29.0294	28.8598	29.0285	28.8517	28.9789	28.9882	28.7213	28.823	28.7688	28.9293	28.9479	28.9297	28.59	28.3287	28.4601	29.3637	29.3748	29.2873	28.7573	28.7158	28.777	28.7517	28.7356	28.7149	28.7272	28.6437	28.7145	28.9925	28.9585	28.8745	28.7043	28.6683	28.679	28.9418	28.9252	28.9394	28.9333	28.8996
1	NaN	E9PSS2;B9TSW3;A0A0G2JSZ9;Q9JK72	Superoxide dismutase [Cu-Zn];Copper chaperone for superoxide dismutase	Ccs;CCS	4	23.983	75810000	17	NaN	NaN	NaN	NaN	NaN	NaN	NaN	NaN	NaN	NaN	NaN	NaN	NaN	NaN	NaN	NaN	NaN	NaN	NaN	NaN	NaN	NaN	NaN	NaN	NaN	NaN	NaN	NaN	NaN	NaN	NaN	NaN	NaN	NaN	NaN	NaN	NaN	NaN	NaN	NaN	NaN
0.00407344	0.184029	A0A0G2JT06;A0A0G2JW80;P97834	COP9 signalosome complex subunit 1	Gps1	8	58.876	873520000	117	23.9462	23.489	23.7183	23.766	22.5676	22.4696	23.4233	23.4003	23.4454	23.6514	23.5513	23.2246	23.7833	23.5188	23.5445	23.7915	NaN	NaN	23.4303	23.177	23.3861	23.4336	23.518	23.6579	23.5447	23.5612	23.5831	NaN	23.8014	23.7555	23.5631	23.7211	23.4059	23.6753	23.9327	23.6229	23.9008	23.8171	23.8511	24.0245	23.5652
0.711592	-0.0241752	A0A0G2JT25;Q920P0	L-xylulose reductase	Dcxr	6	22.865	412050000	51	22.7062	22.8104	22.855	NaN	NaN	22.7123	22.7961	22.7806	NaN	22.8663	NaN	NaN	NaN	22.9231	NaN	NaN	NaN	NaN	23.0159	NaN	NaN	NaN	NaN	NaN	NaN	NaN	NaN	NaN	NaN	NaN	22.8014	22.8679	23.1574	22.8332	NaN	NaN	22.8747	22.9423	22.8962	22.9679	NaN
0.398487	-0.0700584	A0A0G2JT30;Q5U2R0	Methionine adenosyltransferase 2 subunit beta	Mat2b	13	36.236	1895300000	243	24.5493	24.778	24.4854	25.1881	25.0052	25.092	24.5861	24.571	24.6192	24.6492	24.6162	24.7972	24.5325	24.6023	24.4702	25.2599	25.3437	25.4829	25.1321	25.19	25.1104	24.527	24.6226	24.7168	24.6562	24.9898	24.7421	24.6411	24.5976	24.6111	24.76	24.8438	24.7872	24.4734	24.4296	24.5534	24.8913	24.7616	24.843	24.6721	24.4677
0.147522	0.20461	A0A0G2JT33;F1LPX8;O08653	Telomerase protein component 1	Tep1	16	293.03	981090000	62	23.5168	23.5231	23.7971	NaN	23.777	24.2344	23.9048	23.6629	23.8545	23.9785	23.9665	23.9539	24.051	23.8792	24.0498	NaN	NaN	NaN	23.8405	23.5629	NaN	23.8841	23.9124	23.5984	24.5668	24.2304	23.9532	23.6158	23.5801	23.0655	24.0199	24.0714	NaN	23.4246	23.4825	23.4939	NaN	23.1666	23.8862	23.5836	24.0743
1	NaN	A0A0G2JT51;P83006	Platelet-activating factor acetylhydrolase 2, cytoplasmic	Pafah2	1	42.395	109320000	35	NaN	NaN	NaN	NaN	NaN	NaN	NaN	NaN	NaN	NaN	NaN	NaN	NaN	NaN	NaN	NaN	NaN	NaN	NaN	NaN	NaN	NaN	NaN	NaN	NaN	NaN	NaN	NaN	NaN	NaN	NaN	NaN	NaN	NaN	NaN	NaN	NaN	NaN	NaN	NaN	NaN
1	NaN	A0A0G2JT68;D3ZGS5		Uaca	3	159.16	32855000	13	NaN	NaN	NaN	NaN	NaN	NaN	NaN	NaN	NaN	NaN	NaN	NaN	NaN	NaN	NaN	NaN	NaN	NaN	NaN	NaN	NaN	NaN	NaN	NaN	NaN	NaN	NaN	NaN	NaN	NaN	NaN	NaN	NaN	NaN	NaN	NaN	NaN	NaN	NaN	NaN	20.8715
1	NaN	A0A0G2JVT8;A0A0G2JT86;Q4G053		Samd9l	4	178.77	105140000	13	NaN	NaN	NaN	NaN	NaN	NaN	NaN	NaN	NaN	NaN	NaN	NaN	NaN	NaN	NaN	NaN	NaN	NaN	NaN	NaN	NaN	NaN	NaN	NaN	NaN	NaN	NaN	NaN	NaN	NaN	NaN	NaN	NaN	NaN	NaN	NaN	NaN	NaN	NaN	NaN	NaN
1	NaN	A0A0G2JT88;Q4V884		Cdc16	2	69.103	63489000	4	NaN	NaN	NaN	NaN	NaN	NaN	NaN	NaN	NaN	NaN	NaN	NaN	NaN	NaN	NaN	NaN	NaN	NaN	NaN	NaN	NaN	NaN	NaN	NaN	NaN	NaN	NaN	NaN	NaN	NaN	NaN	NaN	NaN	NaN	NaN	NaN	NaN	NaN	NaN	NaN	NaN
1	NaN	Q09LT0;Q9JI49;Q7TSL4;A0A0G2K044;A0A0G2JT89;Q91XN5;A0A0G2JWD0		Prom1	1	29.61	49090000	9	NaN	NaN	NaN	NaN	NaN	NaN	NaN	NaN	NaN	NaN	NaN	NaN	NaN	NaN	NaN	NaN	NaN	NaN	NaN	NaN	NaN	NaN	NaN	NaN	NaN	NaN	NaN	NaN	NaN	NaN	NaN	NaN	NaN	NaN	NaN	NaN	NaN	NaN	NaN	NaN	NaN
0.274635	-0.061189	A0A0G2JT93;Q9WU82;B6DMG1	Catenin beta-1	Ctnnb1	28	85.47	10056000000	718	27.0913	27.0906	27.1019	27.3967	27.3955	27.3947	27.273	27.2454	27.2163	27.359	27.246	27.334	27.2065	27.1322	27.1184	27.7622	27.5444	27.7867	27.1593	27.0564	27.19	27.0123	27.1505	27.1018	26.7648	26.8246	26.7725	26.8498	26.9669	27.0225	27.1539	27.1098	27.1545	27.0898	26.9575	26.9732	27.1726	27.2357	27.155	26.8561	26.857
0.907558	0.0167187	A0A0G2JTA0;Q5BK32			7	52.46	558430000	69	23.296	22.4912	NaN	NaN	22.6957	23.2465	22.9386	22.8294	22.9037	23.1984	22.7392	22.8166	23.4501	23.2059	22.6686	NaN	NaN	NaN	23.3766	NaN	23.7011	23.4444	NaN	23.2852	23.1254	23.114	23.155	NaN	22.9819	NaN	NaN	22.2664	NaN	23.527	23.1225	23.2222	23.2473	22.9696	22.6023	23.278	23.391
0.026498	-0.247984	D3ZHI9;A0A0G2JTA1		Ppp2r5e	4	50.346	228490000	54	NaN	21.959	NaN	22.2744	21.8983	22.2346	22.1723	22.1948	NaN	22.286	22.4592	22.198	21.8479	21.883	21.9884	22.7467	NaN	NaN	NaN	NaN	NaN	NaN	21.9626	21.9701	22.1236	NaN	NaN	NaN	NaN	22.1166	NaN	NaN	NaN	NaN	NaN	NaN	NaN	22.034	21.4989	21.9659	NaN
0.0693035	0.216076	A0A0G2JTA4			21	279.07	1538000000	131	24.1756	24.5294	24.6433	24.4124	24.4678	24.3081	24.5969	24.6826	24.4468	24.2215	24.4004	23.7469	24.9631	24.9148	24.9187	24.324	NaN	24.3804	24.1128	24.0085	24.4214	23.8838	23.934	23.8033	24.5267	24.5068	24.5488	24.6787	24.6159	24.3099	24.0005	24.0968	24.3569	23.8301	24.02	23.9409	24.691	25.0067	25.0861	23.7171	24.2716
0.444365	-0.0534617	A0A0G2JTB2;A0A096MIX1		Gbe1	10	75.706	1233400000	93	23.9667	23.9505	23.8129	23.923	23.2208	23.7029	23.918	24.2145	23.8812	24.0965	24.4002	24.3144	23.9423	24.1239	24.0456	24.5743	24.1515	24.4987	23.9407	24.4324	24.1434	23.8762	23.9252	23.9206	24.0367	23.9616	24.0389	24.0588	24.1517	23.8165	24.3668	24.0309	24.1518	23.9741	24.2162	23.7765	24.0749	24.0623	24.4031	23.9573	23.9419
1	NaN	A0A1B0GWS3;A0A0G2JTD7;F1LNR1;F1LNR0;F1LNQ9;A0A0G2JUI5;Q5M928;A0A0G2JZM8;Q99JD4		Clasp1	4	89.872	145830000	4	NaN	NaN	NaN	NaN	NaN	NaN	NaN	NaN	NaN	NaN	NaN	NaN	NaN	NaN	NaN	NaN	NaN	NaN	NaN	NaN	NaN	NaN	21.8726	NaN	NaN	NaN	NaN	NaN	NaN	NaN	NaN	NaN	NaN	NaN	NaN	NaN	NaN	NaN	NaN	NaN	NaN
0.668098	0.020838	A0A0G2JTG7;Q8VHV7;G3V9Q3;Q499R8	Heterogeneous nuclear ribonucleoprotein H;Heterogeneous nuclear ribonucleoprotein H, N-terminally processed	Hnrnph1	12	49.199	6294500000	431	26.3451	26.3844	26.2737	26.2028	26.414	26.2407	26.3325	26.3386	26.2784	26.4879	26.4981	26.4853	26.3564	26.4961	26.418	25.6763	25.239	25.9845	26.3007	26.3637	26.5588	26.5508	26.3689	26.3934	26.3082	26.4148	26.4719	26.2729	26.5238	26.2845	26.374	26.2947	26.2888	26.5232	26.3261	26.3835	26.6016	26.5941	26.6628	26.5267	26.4504
1	NaN	A0A0G2JTH4;P97829	Leukocyte surface antigen CD47	Cd47	2	38.927	333110000	59	NaN	NaN	NaN	NaN	NaN	NaN	NaN	NaN	NaN	NaN	NaN	NaN	NaN	NaN	NaN	NaN	NaN	NaN	NaN	NaN	NaN	NaN	NaN	NaN	NaN	NaN	NaN	NaN	NaN	NaN	NaN	NaN	NaN	NaN	NaN	NaN	NaN	NaN	NaN	NaN	NaN
0.173356	0.134715	A0A0G2JTH7;F1M7B8		Ube3a	4	95.637	299190000	26	NaN	NaN	NaN	NaN	NaN	NaN	NaN	NaN	22.1951	NaN	NaN	22.2705	22.1595	22.2136	22.28	NaN	NaN	NaN	NaN	NaN	NaN	NaN	NaN	NaN	NaN	NaN	NaN	NaN	NaN	NaN	21.9169	NaN	NaN	21.9236	NaN	22.2297	NaN	NaN	NaN	NaN	NaN
1	NaN	D3ZI99;A0A0G2JTI7		Prpf3	4	72.195	44742000	4	NaN	NaN	NaN	NaN	NaN	NaN	NaN	NaN	NaN	NaN	NaN	NaN	NaN	21.2322	NaN	NaN	NaN	NaN	NaN	NaN	NaN	NaN	NaN	NaN	NaN	NaN	NaN	NaN	NaN	NaN	NaN	NaN	NaN	NaN	NaN	NaN	NaN	NaN	NaN	NaN	NaN
1	NaN	G3V969;A0A0G2JTJ9;D4A030		Tfcp2;Ubp1	1	56.529	0	5	NaN	NaN	NaN	NaN	NaN	NaN	NaN	NaN	NaN	NaN	NaN	NaN	NaN	NaN	NaN	NaN	NaN	NaN	NaN	NaN	NaN	NaN	NaN	NaN	NaN	NaN	NaN	NaN	NaN	NaN	NaN	NaN	NaN	NaN	NaN	NaN	NaN	NaN	NaN	NaN	NaN
1	NaN	D3ZG37;A0A0G2JTK4		Ppp6r1	2	94.938	103070000	5	NaN	NaN	NaN	NaN	NaN	NaN	NaN	NaN	NaN	NaN	NaN	NaN	NaN	NaN	NaN	NaN	NaN	NaN	NaN	NaN	NaN	NaN	NaN	NaN	NaN	NaN	NaN	NaN	NaN	NaN	NaN	NaN	NaN	NaN	NaN	22.4596	NaN	NaN	NaN	NaN	NaN
0.0822841	-0.0903033	A0A0G2JTL5;P52873	Pyruvate carboxylase, mitochondrial	Pc	43	140	9741800000	775	26.9478	26.8748	26.8813	27.2771	27.2121	27.3171	27.0481	27.0854	27.0752	27.0706	27.0495	27.1093	27.0299	26.9044	27.0064	26.8538	26.973	27.1196	27.355	27.3264	27.3654	27.1963	27.2812	27.205	27.0268	26.9559	27.0469	27.131	27.2247	27.0396	27.2124	27.1732	27.2464	26.9832	26.9555	26.9924	27.0975	26.9692	26.9631	27.3371	27.3996
1	NaN	D3ZVT3;A0A0G2JTL6		Card6	1	122.06	2269400	0	NaN	NaN	NaN	NaN	NaN	NaN	NaN	NaN	NaN	NaN	NaN	NaN	NaN	NaN	NaN	NaN	NaN	20.961	NaN	NaN	NaN	NaN	NaN	NaN	NaN	NaN	NaN	NaN	NaN	NaN	NaN	NaN	NaN	NaN	NaN	NaN	NaN	NaN	NaN	NaN	NaN
0.00233306	-0.293869	A0A0G2JTN4;D4AB17		LOC100912917	28	144.39	3904100000	270	25.3587	25.3794	25.2618	26.1524	26.0037	25.9876	25.4907	25.7663	25.7172	25.7003	25.6129	25.76	25.5022	25.6196	25.7745	26.4893	27.0661	26.9475	25.9135	25.8675	26.0373	25.5433	25.4886	25.4788	25.8811	25.9665	25.8246	25.9801	26.0178	26.0595	26.0294	25.8909	25.6779	25.6049	25.5943	25.4253	25.3941	25.3762	25.6554	25.9476	25.9882
0.494094	0.210269	A0A0G2JTP6;F1LSF5;P43884	Perilipin;Perilipin-1	Plin1	10	55.862	808020000	94	23.6637	24.1616	23.6108	NaN	NaN	NaN	NaN	22.8872	23.1574	NaN	NaN	NaN	22.43	NaN	22.8122	NaN	NaN	NaN	24.0688	23.7636	24.0446	24.7042	24.5064	24.5097	NaN	NaN	NaN	24.6994	24.8049	24.9138	23.3251	23.4495	23.3848	23.3187	23.312	23.8298	NaN	NaN	22.5653	24.4839	24.5787
0.0142659	-0.227105	A0A0G2JTQ5;Q5XIG6	N-acetylgalactosamine kinase	Galk2	12	49.072	2243200000	228	24.5739	24.5295	24.8419	25.2269	25.4778	25.4311	24.9142	25.032	25.0161	24.587	24.6474	24.8374	24.8149	24.8412	24.7595	25.0926	25.2781	24.7383	25.5591	25.3409	25.5357	24.7394	24.842	24.8569	25.3286	25.4079	25.2608	24.8418	24.938	25.0638	25.1829	25.1958	25.2449	24.4288	24.6352	24.5631	24.9808	25.1845	25.0053	24.8469	24.7525
1	NaN	A0A0G2JZZ7;A0A0G2JTR4			2	93.77	27560000	12	NaN	NaN	NaN	NaN	NaN	NaN	NaN	NaN	NaN	NaN	NaN	NaN	NaN	NaN	NaN	NaN	NaN	NaN	NaN	NaN	NaN	NaN	NaN	NaN	NaN	NaN	NaN	NaN	NaN	NaN	NaN	NaN	NaN	NaN	NaN	NaN	NaN	NaN	NaN	NaN	NaN
0.380569	-0.0691442	A0A0G2JTS5;D3ZNS1;A0A0G2JV32;Q63312	Pleckstrin homology-like domain family B member 1	Phldb1	4	87.471	168520000	20	NaN	NaN	NaN	NaN	NaN	NaN	21.4737	NaN	NaN	NaN	21.586	21.5249	21.4627	NaN	NaN	NaN	NaN	NaN	NaN	NaN	NaN	NaN	NaN	NaN	NaN	NaN	NaN	NaN	NaN	NaN	NaN	NaN	NaN	NaN	NaN	NaN	NaN	21.339	NaN	NaN	NaN
0.383199	0.0925742	Q66WT9;A0A0G2JUQ5;Q498N4;A0A0G2JTT2;Q66SY1;O55012;A0A0G2K0B6;F1LRK0;Q05140	Phosphatidylinositol-binding clathrin assembly protein	Picalm	12	64.713	2793800000	207	25.3461	25.0831	24.8667	25.5093	25.4774	25.7637	25.307	25.2479	25.0285	25.5421	25.4061	25.7047	25.7219	25.4662	25.6768	25.2402	NaN	NaN	24.8648	24.9429	25.1101	25.3261	25.2358	25.3311	25.2386	25.493	25.4166	25.485	25.3559	25.2728	25.0172	24.6927	25.1099	25.2675	25.2	25.2899	25.4396	24.7743	24.809	25.3993	25.5401
0.0880515	-0.0801739	D3ZB30;A0A0G2JTV1;Q6P736		Ptbp1	27	56.935	21143000000	1288	28.0452	28.1004	28.0205	28.503	28.5055	28.3244	28.332	28.1594	28.164	28.373	28.3059	28.332	28.3201	28.2342	28.2187	27.0617	26.5588	26.6014	28.395	28.4732	28.4304	28.1352	28.2116	28.0933	28.2483	28.3592	28.2826	28.3094	28.4678	28.3345	28.4021	28.2395	28.3119	28.0157	28.1261	28.0668	28.2627	28.2813	28.1622	28.3922	28.3959
0.113203	0.155744	A0A0G2JTV2;REV__D3ZZ81;REV__A0A0G2K3L9;REV__A0A1B0GWM2;REV__A0A1B0GWS0			64	72.282	61591000000	2634	29.7674	29.8132	29.8232	29.1557	29.0998	29.1355	29.4573	29.4509	29.5053	29.6432	29.6565	29.6845	29.896	29.8222	29.8362	29.7759	29.8046	29.7794	29.293	29.3325	29.4403	29.4869	29.4851	29.5224	29.4819	29.4367	29.4993	29.4666	29.5396	29.4997	29.4618	29.4288	29.4639	30.0201	30.0398	29.9736	29.9171	30.0227	29.9886	29.2586	29.2852
0.458877	-0.080976	A0A0G2JTW9			8	15.988	15330000000	393	27.2584	27.2787	27.2446	27.3766	27.3319	27.5354	27.2375	27.2944	27.4054	27.3738	27.4397	27.4181	27.261	27.3857	27.2712	26.6053	26.4139	26.3578	27.5166	27.4334	27.5091	27.7012	27.5061	27.5919	27.5942	27.5605	27.5884	27.7532	27.5769	27.6378	27.351	27.3782	27.3172	27.1465	27.2814	27.1842	27.3293	27.3176	27.3349	28.1321	28.1302
0.366422	0.0484863	A0A0G2JTX7;F1LZF4;D3ZL10		Col6a5	67	288.98	40865000000	1684	29.2841	29.2621	29.3411	29.467	29.4283	29.4321	29.1886	29.1923	29.1061	28.8918	28.9026	28.8593	29.0597	29.1967	29.1947	27.9011	27.7001	28.0613	29.1222	29.0869	29.222	29.1325	29.1129	29.0952	29.1844	29.2281	29.2291	28.8982	28.9428	28.9085	29.0585	28.9989	28.9937	28.8798	28.9376	28.8805	29.4416	29.4563	29.4663	29.0308	28.9092
1	NaN	A0A0G2JTX9			1	27.639	72014000	42	NaN	NaN	NaN	NaN	NaN	NaN	NaN	NaN	NaN	NaN	NaN	NaN	NaN	NaN	NaN	NaN	NaN	NaN	NaN	NaN	NaN	NaN	NaN	NaN	NaN	NaN	NaN	NaN	NaN	NaN	NaN	NaN	NaN	NaN	NaN	NaN	NaN	NaN	NaN	NaN	NaN
1	0.259099	F1LRK4;A0A0G2JTY6;Q3SYP9		Grsf1	3	52.907	404500000	7	NaN	NaN	NaN	22.7073	22.6495	22.7408	NaN	NaN	NaN	NaN	NaN	NaN	NaN	NaN	NaN	NaN	NaN	NaN	NaN	NaN	NaN	NaN	NaN	NaN	NaN	NaN	NaN	NaN	NaN	NaN	22.6093	NaN	NaN	NaN	NaN	NaN	NaN	NaN	NaN	NaN	NaN
0.996298	0.000742722	A0A0G2JU01;A0A0G2K4L2;E9PTJ8;A0A0G2K446;Q5BK37;Q9Z1I6	Rho guanine nucleotide exchange factor 1	Arhgef1	8	96.684	289840000	35	NaN	NaN	NaN	22.8899	22.7387	NaN	22.4771	NaN	22.5803	NaN	22.7523	22.537	22.3619	NaN	NaN	NaN	NaN	NaN	NaN	NaN	22.6996	22.6414	NaN	NaN	22.5136	23.1655	22.7246	NaN	NaN	22.6128	NaN	NaN	NaN	NaN	NaN	22.3707	NaN	22.4242	NaN	22.8112	NaN
0.0200994	-0.179902	B2GV09;A0A0G2JU05		Llgl2	17	114.02	1695700000	213	24.2657	24.3556	24.1615	24.8715	25.2258	24.6969	24.3791	24.4722	24.3486	24.3983	24.1792	24.3361	24.393	24.1719	24.3452	25.6681	24.3972	24.4128	24.9013	24.8147	24.7956	24.7841	24.6134	24.4297	24.4944	24.6541	24.5974	24.6541	24.7286	24.6208	24.693	24.6528	24.8786	24.1756	24.2079	24.1889	24.2468	24.4046	24.2724	24.5729	24.7517
0.691519	0.0925337	A0A0G2JU12			2	14.828	617960000	60	NaN	NaN	22.9522	NaN	NaN	NaN	23.7492	23.1928	23.4779	NaN	NaN	NaN	23.6836	22.8394	NaN	NaN	NaN	NaN	NaN	NaN	NaN	NaN	NaN	NaN	NaN	NaN	NaN	NaN	23.7776	NaN	NaN	NaN	NaN	23.1769	23.2128	NaN	NaN	NaN	NaN	NaN	NaN
0.218724	0.189044	A0A0G2JU15;D3ZGM1;Q4KM70		Ptcd3	9	84.556	762940000	58	NaN	23.5992	NaN	23.8199	NaN	23.9921	22.9132	NaN	23.7087	23.4722	23.4314	23.6919	NaN	23.4922	NaN	NaN	NaN	NaN	NaN	NaN	NaN	NaN	23.8414	23.4806	23.5022	23.8013	NaN	23.4875	23.6914	NaN	NaN	NaN	NaN	23.4596	NaN	23.3964	NaN	NaN	23.5026	23.7714	23.8535
0.725952	0.0720552	A0A0G2JU49;Q4KLN2;B0BN02		Mtx1	6	51.925	236820000	65	NaN	NaN	NaN	23.1706	22.5479	23.0738	NaN	NaN	NaN	22.218	22.2229	22.2346	22.6235	22.5519	22.321	NaN	23.1204	NaN	22.8544	22.301	NaN	23.0128	22.7245	22.7035	NaN	NaN	NaN	NaN	NaN	NaN	NaN	22.3972	NaN	22.3462	22.526	22.3832	NaN	NaN	NaN	22.4449	NaN
0.386035	-0.0979978	A0A0G2JU77;D4A190			5	24.792	1121700000	60	23.8239	23.9024	23.8524	22.6606	NaN	24.3149	24.0058	24.4198	24.2782	23.8623	24.1269	24.125	NaN	23.9846	24.0506	NaN	NaN	NaN	NaN	NaN	NaN	24.2923	24.4586	NaN	24.7524	24.444	24.3029	NaN	NaN	NaN	NaN	NaN	NaN	24.9578	24.025	23.9851	NaN	23.8995	23.9568	24.1006	24.1265
0.880582	-0.0121571	A0A0G2JU89;F1LQI5;Q2TL32	E3 ubiquitin-protein ligase UBR4	Ubr4	31	573.87	2224500000	232	24.7578	24.5418	24.5848	24.4958	24.9184	24.8968	24.8315	24.6486	24.7116	25.3376	25.0795	25.2177	24.7459	24.7491	24.6112	24.9306	24.9113	25.56	24.7513	24.7277	24.9758	24.8366	25.0209	25.0257	25.0956	24.9132	25.2026	24.5227	24.7839	24.5717	25.376	25.3666	24.9318	24.7393	24.4368	24.6714	25.0262	24.9591	25.1316	25.208	24.8615
0.134355	0.132309	A0A0G2JUA5;A0A0G2JU96;Q38PG2;Q38PF8;Q38PG0;Q38PF9;Q8VHJ0;Q38PG3;Q8VHI9			257	581.12	160970000000	8062	31.2061	31.219	31.1978	31.1768	31.2451	31.196	31.2351	31.1904	31.2091	31.1242	31.1238	31.0935	31.2946	31.332	31.3008	29.2845	29.2406	29.5824	30.7623	30.7055	30.6891	30.7361	30.7567	30.7746	31.134	31.1525	31.1001	31.2205	31.2039	31.2093	30.6643	30.6399	30.6427	30.9546	30.9697	30.9229	31.0159	31.0522	31.0725	31.1672	31.2188
0.152788	0.149208	A0A0G2JUB0;Q810F4	Protein FAM3C	Fam3c	2	24.734	211540000	18	NaN	NaN	NaN	NaN	NaN	NaN	NaN	NaN	NaN	22.0172	22.1571	NaN	22.579	NaN	22.2006	NaN	NaN	NaN	NaN	22.0286	NaN	NaN	NaN	NaN	NaN	22.2587	22.0791	NaN	NaN	NaN	NaN	NaN	22.1253	NaN	NaN	NaN	NaN	NaN	NaN	NaN	NaN
0.125749	-0.0655441	A0A0G2JUC7;Q6AYH5	Dynactin subunit 2	Dctn2	25	46.222	8094300000	605	26.8536	26.8027	26.7771	27.1157	27.1406	27.2719	26.929	26.9157	26.8173	26.9346	26.8048	26.8783	26.7962	26.8896	26.8681	25.7591	25.493	25.321	26.9708	26.87	26.9069	26.7749	26.7158	26.6406	26.7579	26.7753	26.8441	27.0036	27.0387	27.0234	26.6995	26.6457	26.6113	26.6618	26.823	26.7239	26.8601	26.7255	26.6381	26.9902	26.7852
1	NaN	A0A0G2K763;A0A0G2JUD4;B4F7D7;A0A0G2K5C9		Ept1	1	13.292	86916000	32	NaN	NaN	NaN	NaN	NaN	NaN	NaN	NaN	NaN	NaN	NaN	NaN	NaN	NaN	NaN	NaN	NaN	NaN	NaN	NaN	NaN	NaN	NaN	NaN	NaN	NaN	NaN	NaN	NaN	NaN	NaN	NaN	NaN	NaN	NaN	NaN	NaN	NaN	NaN	NaN	NaN
0.710802	-0.0254866	A0A0G2JUE4;Q5U4E6;A0A0G2K9I3	Golgin subfamily A member 4	Golga4	9	262.46	245050000	60	NaN	21.9346	NaN	21.9853	NaN	NaN	22.3237	NaN	22.1734	22.2341	22.271	22.2439	21.9882	21.9692	22.0685	NaN	NaN	NaN	NaN	NaN	21.962	NaN	NaN	22.076	NaN	21.8656	NaN	21.7903	NaN	21.8996	NaN	NaN	22.169	22.2776	21.9723	21.657	22.3346	22.3392	22.1434	NaN	22.2184
0.997882	0.000232697	Q6AXV0;A0A0G2JUH4		Pnkp	4	57.186	431760000	58	NaN	NaN	NaN	NaN	22.1388	21.7547	23.1542	22.8608	23.0522	NaN	NaN	NaN	NaN	22.7796	22.8555	NaN	NaN	NaN	NaN	NaN	NaN	22.1502	NaN	NaN	22.9673	NaN	NaN	22.7866	22.7467	NaN	22.8941	NaN	22.7893	22.3475	22.4234	22.6237	NaN	22.8692	NaN	NaN	NaN
1	NaN	A0A0G2JUK2;B2GV58;A0A096MJY7;A0A096MKE7		Lsm14a	2	50.605	576640000	33	NaN	NaN	NaN	NaN	NaN	NaN	NaN	NaN	NaN	NaN	NaN	NaN	NaN	NaN	NaN	NaN	NaN	NaN	NaN	NaN	NaN	NaN	NaN	NaN	NaN	NaN	NaN	NaN	NaN	NaN	NaN	NaN	NaN	NaN	NaN	NaN	NaN	NaN	NaN	NaN	NaN
0.929131	-0.0117388	A0A0G2JUK4;M0R4P9		Ube2h	2	17.174	189010000	57	NaN	21.3976	NaN	NaN	NaN	NaN	21.8871	22.1044	NaN	21.6457	NaN	21.7886	21.9739	NaN	22.0249	NaN	NaN	NaN	NaN	NaN	NaN	21.4365	21.606	21.7652	22.3355	21.9352	21.986	NaN	NaN	NaN	NaN	21.1368	NaN	21.869	NaN	NaN	21.6731	NaN	21.68	NaN	21.5682
0.175641	0.138345	A0A0G2JUL7;B3GNI6	Septin-11	2011-09-01	17	49.341	5822300000	539	26.3578	26.2038	26.3094	25.4934	25.577	25.6938	26.432	26.3904	26.436	26.2475	26.1547	26.1926	26.4635	26.4506	26.4748	26.5465	26.8668	25.653	25.8677	25.9244	26.0919	26.17	26.0954	26.1792	26.7025	26.5873	26.7008	25.7983	25.6139	25.7133	26.0026	25.9266	25.9288	26.2938	26.2015	26.3453	26.4274	26.4264	26.5018	26.0553	26.0949
1	NaN	F1LZL1;F1LQX1;A0A0G2JUM0;Q9WUW8;F1LZI5;A0A0G2JZU5;A0A0G2K1B3;A0A0G2JUU8	Sulfotransferase;Sulfotransferase 1C2	RGD1562392;Sult1c2;LOC100910057	1	34.731	39486000	1	NaN	NaN	NaN	NaN	NaN	NaN	NaN	NaN	NaN	NaN	NaN	NaN	NaN	NaN	NaN	NaN	NaN	NaN	NaN	NaN	NaN	NaN	NaN	NaN	NaN	NaN	NaN	NaN	NaN	NaN	NaN	NaN	NaN	NaN	NaN	NaN	NaN	NaN	NaN	NaN	NaN
1	NaN	A0A0G2JUM8			1	9.3683	45246000	50	NaN	NaN	NaN	NaN	NaN	NaN	NaN	NaN	NaN	NaN	NaN	NaN	NaN	NaN	NaN	NaN	NaN	NaN	NaN	NaN	NaN	NaN	NaN	NaN	NaN	NaN	NaN	NaN	NaN	NaN	NaN	NaN	NaN	NaN	NaN	NaN	NaN	NaN	NaN	NaN	NaN
1	NaN	A0A0G2JUN5;Q8CIN7	Inositol monophosphatase 2	Impa2	1	31.133	41385000	7	NaN	NaN	NaN	NaN	NaN	NaN	NaN	NaN	NaN	NaN	NaN	NaN	NaN	NaN	NaN	NaN	NaN	NaN	NaN	NaN	NaN	NaN	NaN	NaN	NaN	NaN	NaN	NaN	NaN	NaN	NaN	NaN	NaN	NaN	NaN	NaN	NaN	NaN	NaN	NaN	NaN
0.0100436	0.345121	A0A0G2JUN8;Q9JHW0	Proteasome subunit beta type-7	Psmb7	6	31.807	808480000	119	23.5519	23.8715	23.8768	21.3569	NaN	NaN	23.1392	23.0761	23.2133	23.9489	24.1193	24.0734	23.7401	23.7804	23.4969	23.0144	23.1718	22.2271	22.8387	22.8324	22.9427	23.1968	23.3574	23.2421	23.5211	23.0522	23.1362	22.435	22.5228	22.5519	23.3711	23.6782	23.6797	23.7181	23.7306	23.5889	24.1641	24.1986	24.094	22.4318	22.6512
1	NaN	A0A0G2JUP3;A0A0G2K8N1;Q80ZF5;A0A0G2K3P4			5	815.45	75012000	8	NaN	NaN	NaN	NaN	NaN	NaN	NaN	NaN	NaN	NaN	NaN	NaN	NaN	NaN	NaN	25.1582	25.6328	25.0002	NaN	NaN	NaN	NaN	NaN	NaN	NaN	NaN	NaN	NaN	NaN	NaN	NaN	NaN	NaN	NaN	NaN	NaN	NaN	NaN	NaN	NaN	NaN
1	NaN	A0A0G2JUQ9;A0A0G2JXL3;Q6MG10;F6Q5K7		Mrps18b	1	10.392	18524000	9	NaN	NaN	NaN	NaN	NaN	NaN	NaN	NaN	NaN	NaN	NaN	NaN	NaN	NaN	NaN	NaN	NaN	NaN	NaN	NaN	NaN	NaN	NaN	NaN	NaN	NaN	NaN	NaN	NaN	NaN	NaN	NaN	NaN	NaN	NaN	NaN	NaN	NaN	NaN	NaN	NaN
1	-0.125748	A0A0G2JUR5;A0A140TA95;G3V9F3;Q9ERE6	Myosin phosphatase Rho-interacting protein	Mprip	8	240.07	252500000	26	22.2958	NaN	NaN	22.5976	22.6979	22.8653	22.5113	NaN	NaN	22.3264	NaN	22.2809	NaN	22.3365	NaN	NaN	NaN	NaN	NaN	NaN	NaN	NaN	22.5842	NaN	NaN	22.4831	NaN	NaN	NaN	NaN	NaN	NaN	NaN	NaN	NaN	NaN	NaN	NaN	NaN	NaN	NaN
0.673525	-0.0487193	A0A0G2JUX4;F1MAA1;B2GVC1	Ubiquitin carboxyl-terminal hydrolase	Usp47	11	157.3	459530000	55	NaN	22.6057	22.4558	23.1776	23.2775	NaN	22.844	22.943	NaN	22.7843	22.5179	22.6201	22.873	22.6854	22.4813	NaN	NaN	NaN	NaN	22.8266	NaN	22.7374	22.9481	22.6756	23.25	23.1768	22.866	NaN	NaN	NaN	NaN	NaN	NaN	22.6549	NaN	22.521	22.6853	22.9114	23.2676	22.9648	22.6863
1	NaN	D3ZKK5;A0A0G2JUZ0		Mtmr1	2	74.514	9408000	0	NaN	NaN	NaN	NaN	NaN	NaN	NaN	NaN	NaN	NaN	NaN	NaN	NaN	NaN	NaN	NaN	NaN	NaN	NaN	NaN	NaN	NaN	NaN	NaN	NaN	NaN	NaN	NaN	NaN	NaN	NaN	NaN	NaN	NaN	NaN	NaN	NaN	NaN	NaN	NaN	NaN
0.950691	-0.00384394	A0A0G2JV12;F1LPD0;Q4G024		Col15a1	14	138.27	3043900000	332	25.5565	25.1675	25.5427	25.4045	25.4278	25.6674	25.1145	25.4471	25.2935	24.7012	24.8615	24.9751	25.4035	25.5171	25.1685	25.0144	NaN	NaN	25.3163	25.4212	25.5591	25.1774	25.3333	25.3866	25.4222	25.4332	25.3878	25.7618	25.7008	25.7719	25.0864	25.2116	25.2394	25.1879	25.2662	25.2959	25.3153	25.2586	25.3924	25.6557	25.7289
0.291789	-0.0751962	A0A0G2JV31;O54975	Xaa-Pro aminopeptidase 1;Xaa-Pro aminopeptidase 1, N-terminally processed	Xpnpep1	25	74.667	6025400000	299	26.3053	26.2621	26.2844	26.2453	26.6819	26.2906	26.3601	26.5625	26.5476	26.3131	26.2861	26.4079	26.1272	26.2351	26.2725	27.1242	27.1629	26.936	26.8569	26.641	26.6316	26.1452	26.1669	26.2292	26.3092	26.2661	26.2794	26.5388	26.6317	26.3545	26.2352	26.2484	26.4286	26.162	26.0676	26.2623	26.5226	26.3533	26.4684	26.4956	26.4889
1	NaN	A0A0G2JV46			3	18.695	272850000	11	NaN	NaN	NaN	NaN	NaN	NaN	NaN	NaN	NaN	22.5059	22.2621	NaN	NaN	NaN	NaN	NaN	NaN	NaN	NaN	NaN	NaN	NaN	NaN	NaN	NaN	NaN	NaN	NaN	NaN	NaN	NaN	NaN	NaN	NaN	NaN	NaN	NaN	NaN	NaN	NaN	NaN
1	NaN	A0A0G2JV49;F1M6T6		Ppp6r2	1	96.963	101990000	60	NaN	NaN	NaN	NaN	NaN	NaN	NaN	NaN	NaN	NaN	NaN	NaN	NaN	NaN	NaN	NaN	NaN	NaN	NaN	NaN	NaN	NaN	NaN	NaN	NaN	NaN	NaN	NaN	NaN	NaN	NaN	NaN	NaN	NaN	NaN	NaN	NaN	NaN	NaN	NaN	NaN
0.106849	0.109329	A0A0G2JV54;Q9Z118	Polypyrimidine tract-binding protein 3	Ptbp3	10	59.809	2673100000	181	24.9478	25.1333	25.1833	25.2914	25.5508	25.3377	25.0385	25.3407	24.9668	25.2089	25.2078	25.3285	25.3909	25.3677	25.5329	NaN	NaN	NaN	25.4222	25.2288	25.3304	25.5406	25.3279	25.348	25.454	25.4403	25.4134	24.8056	24.9572	24.8685	25.0347	25.0541	25.3769	25.0993	24.8676	25.279	25.2634	25.388	25.3745	25.3551	25.4389
1	NaN	A0A1L1WKF1;A0A0G2JV57;A0A0U1RRY3;A0A0U1RRZ2;Q64270	Translation initiation factor eIF-2B subunit alpha	Eif2b1	2	23.285	108400000	6	NaN	NaN	NaN	NaN	NaN	NaN	NaN	NaN	NaN	NaN	NaN	NaN	NaN	NaN	NaN	NaN	NaN	NaN	NaN	NaN	NaN	NaN	NaN	NaN	NaN	NaN	NaN	NaN	NaN	NaN	NaN	NaN	NaN	NaN	NaN	NaN	NaN	NaN	NaN	NaN	NaN
1	NaN	A0A0G2K382;A0A0G2JV77;F1LN69;F1LP90;F1M754;D3ZZQ0;A0A0G2K490;Q3SYQ1;Q5EB61;A0A097PIG6	Misshapen-like kinase 1	Mink1;Map4k4;Tnik	5	149.92	219670000	11	NaN	NaN	NaN	NaN	22.4039	22.5157	NaN	NaN	NaN	NaN	NaN	22.0975	NaN	NaN	NaN	NaN	NaN	NaN	NaN	NaN	NaN	NaN	NaN	NaN	NaN	NaN	NaN	NaN	NaN	NaN	NaN	NaN	NaN	NaN	NaN	NaN	NaN	NaN	NaN	NaN	NaN
1	NaN	A0A0G2K3L7;A0A0G2JV89;D3ZDD7;Q9JKU6	Spermatid perinuclear RNA-binding protein	Strbp	4	70.833	180480000	38	NaN	NaN	NaN	NaN	NaN	NaN	NaN	NaN	NaN	NaN	NaN	NaN	NaN	NaN	NaN	NaN	NaN	NaN	NaN	NaN	NaN	NaN	NaN	NaN	NaN	NaN	NaN	NaN	NaN	NaN	NaN	NaN	NaN	NaN	NaN	NaN	NaN	NaN	NaN	NaN	NaN
1	-0.47477	G3V9I0;A0A0G2JVA4;D3ZQR7;Q811A3	Procollagen-lysine,2-oxoglutarate 5-dioxygenase 2	Plod2	7	84.597	243010000	21	NaN	NaN	NaN	NaN	NaN	NaN	NaN	NaN	NaN	NaN	NaN	NaN	NaN	NaN	22.1894	NaN	NaN	NaN	NaN	NaN	NaN	NaN	NaN	NaN	NaN	NaN	NaN	NaN	NaN	NaN	NaN	NaN	NaN	NaN	NaN	NaN	NaN	NaN	NaN	NaN	NaN
0.738316	0.0253462	A0A0G2K4U8;A0A0G2JVB6;G3V7P1	Syntaxin-12	Stx12	4	31.106	663850000	76	23.3774	23.7679	23.4395	NaN	NaN	22.7049	23.14	23.1339	23.4108	23.164	22.9994	23.1628	23.1671	22.8558	23.0884	NaN	NaN	NaN	23.156	23.0131	23.3035	23.5758	23.3928	23.2638	23.2099	23.5127	23.2096	22.8726	22.5019	23.7102	NaN	NaN	NaN	23.4779	23.0718	23.4232	23.4918	22.9477	23.0801	23.0879	23.0658
0.43116	0.118124	D4A1Y0;A0A0G2JVC2		Scyl2	4	103.36	117440000	33	NaN	NaN	NaN	NaN	NaN	NaN	NaN	NaN	NaN	NaN	NaN	20.8384	21.4966	21.2487	21.4506	NaN	NaN	NaN	NaN	NaN	NaN	21.3061	21.6003	NaN	21.4748	NaN	NaN	NaN	NaN	NaN	NaN	NaN	NaN	20.9463	NaN	21.0292	NaN	NaN	NaN	NaN	NaN
1	NaN	A0A0G2JVC8;P48450;A0A096MK55;A0A096MJH3;A0A096MK62	Lanosterol synthase	Lss	4	83.283	112880000	19	NaN	NaN	NaN	NaN	NaN	NaN	NaN	NaN	NaN	NaN	NaN	NaN	NaN	NaN	22.1304	NaN	NaN	NaN	NaN	NaN	NaN	NaN	NaN	NaN	NaN	NaN	NaN	NaN	NaN	NaN	NaN	NaN	NaN	NaN	NaN	NaN	NaN	NaN	NaN	NaN	NaN
0.0192776	-0.220325	A0A0G2JVD6;A0A0G2K913;P80385	5-AMP-activated protein kinase subunit gamma-1	Prkag1	12	628.82	827690000	139	23.3657	23.2446	23.3582	23.3827	23.6736	23.84	23.4454	23.252	23.2164	23.8224	23.3868	23.6938	23.3248	23.3475	23.3788	NaN	NaN	NaN	23.916	23.5502	23.5676	23.5133	23.5378	23.6474	23.82	23.7142	23.3173	24.2092	23.3927	23.4561	23.7878	23.9081	24.0775	23.6382	23.6758	23.741	23.3968	23.0718	23.1642	23.7414	23.7168
0.0343368	-0.232026	A0A0G2JVG3;Q6P7S0;M0RD14	Pyruvate kinase	Pkm	7	53.193	11757000000	286	27.0149	27.0417	26.9422	27.8187	27.6796	27.6427	27.4814	27.4105	27.4116	27.3308	27.5244	27.5599	27.2095	27.1516	27.2707	25.9242	25.6591	25.8238	28.1173	28.0783	28.0627	27.1771	27.1894	27.1888	27.5732	27.4286	27.4046	27.3361	27.342	27.4406	27.6584	27.6789	27.7469	27.2867	27.3594	27.2747	27.5216	27.5032	27.4803	27.5776	27.6847
0.150935	-0.151599	A0A0G2JVG4;Q9WVK3;A0A0G2JUF1;A0A0G2K6H4	Peroxisomal trans-2-enoyl-CoA reductase	Pecr	6	32.737	760390000	83	23.2933	23.576	23.3903	24.0464	23.6037	NaN	23.747	23.3392	23.8282	23.7086	23.1294	23.6419	23.5983	23.3601	23.2956	NaN	NaN	NaN	23.2911	24.0542	23.9985	23.4396	23.5939	23.4171	23.6281	23.6211	23.6768	23.8266	23.9347	23.6127	23.7265	NaN	23.3672	NaN	23.3982	NaN	23.7423	23.1714	NaN	23.7688	24.1939
0.251157	-0.203906	A0A0G2JVH1;F1M3R4;A0A0G2K318;P70569	Unconventional myosin-Vb	Myo5b	13	212.65	589210000	41	23.0543	22.8506	22.5996	23.2004	23.2495	23.1083	23.0708	22.9851	22.7186	NaN	22.7372	22.9229	NaN	NaN	NaN	NaN	23.368	NaN	23.4969	23.3557	23.0018	22.9527	NaN	23.0756	23.4068	NaN	NaN	22.859	22.612	23.2781	23.1197	23.6136	23.5378	22.8649	22.9038	23.0295	NaN	NaN	NaN	23.07	23.1502
1	NaN	D3ZMQ9;A0A0G2JVH5		Hltf	1	110.04	116390000	0	NaN	NaN	NaN	NaN	NaN	NaN	NaN	NaN	NaN	NaN	NaN	NaN	NaN	NaN	NaN	NaN	NaN	NaN	NaN	NaN	NaN	NaN	NaN	NaN	NaN	NaN	NaN	NaN	NaN	NaN	NaN	NaN	NaN	NaN	NaN	NaN	NaN	NaN	NaN	NaN	NaN
0.501238	-0.120796	A0A0G2JVI4;D3ZDZ7		Fuk	9	119.55	587540000	87	23.1584	NaN	23.0648	23.0304	23.3048	23.5953	22.7761	23.174	23.2616	23.2977	23.4401	23.2367	22.7872	22.5243	NaN	NaN	NaN	NaN	24.0403	NaN	NaN	22.6844	23.4892	23.0435	NaN	NaN	23.0268	22.7676	NaN	22.5178	23.0394	NaN	23.0169	23.0543	NaN	22.8363	23.5699	23.0887	23.3917	22.6075	NaN
1	NaN	A0A0G2JVI5;G3V6Z3;Q8VH46	Actin filament-associated protein 1	Afap1	3	81.961	64932000	5	NaN	NaN	NaN	NaN	NaN	NaN	NaN	NaN	NaN	NaN	NaN	NaN	NaN	NaN	NaN	NaN	NaN	NaN	NaN	NaN	NaN	NaN	NaN	NaN	NaN	NaN	NaN	NaN	NaN	NaN	NaN	NaN	NaN	NaN	NaN	NaN	NaN	NaN	NaN	NaN	NaN
0.832078	-0.0282884	A0A0G2JVL6;Q7TP78;F7EXQ7		Ndufa8	5	19.965	1268100000	136	24.2553	24.0787	24.0635	24.7419	24.8048	24.727	24.5791	24.4488	24.5863	23.7849	23.9437	24.0212	24.1849	24.1971	24.0562	NaN	NaN	NaN	24.5735	24.5312	24.2129	24.4718	24.5708	24.4731	23.872	24.0091	23.7706	24.4933	24.1791	24.5495	23.5248	23.7841	23.9256	24.2745	24.1141	24.2656	23.9652	23.6556	23.7219	24.2811	24.4103
0.501793	-0.0754067	A0A0G2JVM2;A0A0G2K0A8			15	153.47	859800000	137	23.3664	23.6664	23.5546	23.905	23.7058	23.689	23.528	23.6543	23.5561	23.548	NaN	22.8852	23.5589	23.3675	23.3945	24.155	23.837	23.6453	24.0179	23.754	24.1815	23.9095	23.7678	23.7454	NaN	23.201	23.5273	23.4171	23.3498	23.2229	23.9513	23.7868	23.8495	23.5142	23.5249	23.4261	23.7801	23.7651	23.5237	23.4242	23.6469
0.139375	0.268662	A0A0G2JVM6;P84060	Dystrobrevin beta	Dtnb	2	69.649	1376200000	18	NaN	NaN	NaN	NaN	NaN	NaN	24.308	NaN	NaN	NaN	NaN	NaN	NaN	NaN	24.1651	NaN	NaN	NaN	NaN	NaN	NaN	NaN	NaN	24.5539	24.3328	NaN	24.356	NaN	NaN	NaN	NaN	NaN	NaN	NaN	NaN	NaN	NaN	NaN	NaN	NaN	24.4308
1	NaN	A0A0G2JVP5;D3ZZF8;B2RZ22		Paip1	2	45.729	152480000	2	NaN	NaN	NaN	NaN	NaN	NaN	NaN	NaN	NaN	NaN	NaN	NaN	NaN	NaN	NaN	NaN	NaN	NaN	NaN	NaN	NaN	NaN	NaN	NaN	NaN	NaN	NaN	NaN	NaN	NaN	NaN	NaN	NaN	NaN	NaN	NaN	NaN	NaN	NaN	NaN	NaN
1	NaN	A0A0G2JVS7;Q5M7T1	Probable cytosolic iron-sulfur protein assembly protein CIAO1	Ciao1	3	32.696	132860000	8	NaN	NaN	NaN	NaN	22.6492	NaN	NaN	NaN	NaN	NaN	NaN	NaN	NaN	NaN	NaN	NaN	NaN	NaN	NaN	NaN	NaN	NaN	NaN	NaN	NaN	NaN	NaN	NaN	NaN	NaN	NaN	NaN	NaN	NaN	22.152	NaN	NaN	NaN	NaN	22.2136	NaN
0.0204676	-0.161088	A0A0G2JVV5;Q5U2N2	Ubiquitin carboxyl-terminal hydrolase	Usp14	18	52.293	2641300000	271	25.1543	25.0095	24.9936	25.4939	25.3674	25.4277	24.9619	24.9844	25.1236	25.1782	25.0441	25.0425	25.088	25.2215	25.0434	26.0793	25.9861	25.7926	25.1964	25.2283	25.4926	24.8093	24.89	24.9688	24.9822	25.1101	25.2772	25.1574	25.092	25.3754	25.2229	25.3876	25.363	24.9853	25.0447	25.0985	24.9557	24.8189	24.9959	25.2286	25.0482
0.895999	-0.00877355	A0A0G2JVW5;E9PSZ5;Q5RJQ1			22	447.65	1723400000	176	24.5619	24.1025	24.2358	24.9127	24.4569	24.6728	24.628	24.4112	24.3728	24.3859	24.3376	24.4456	24.5563	24.6017	24.4989	NaN	23.8341	NaN	24.682	24.8303	24.6577	24.2978	24.3212	24.4367	24.6328	24.5735	24.6098	24.5991	24.1642	24.3903	24.7134	24.3197	24.3031	24.4219	24.3805	24.3509	24.6661	24.5416	24.6759	24.6059	24.9784
1	NaN	A0A0G2JVY2;D3Z9U2		Cd163	3	119.61	56268000	5	NaN	NaN	NaN	NaN	NaN	NaN	NaN	NaN	NaN	NaN	NaN	NaN	NaN	NaN	NaN	NaN	NaN	NaN	NaN	NaN	NaN	NaN	NaN	NaN	NaN	NaN	NaN	NaN	NaN	NaN	NaN	NaN	NaN	NaN	NaN	NaN	NaN	NaN	NaN	NaN	NaN
1	NaN	F1LZX9;A0A0G2JVZ6		Itgav	7	115.58	256140000	8	NaN	NaN	NaN	NaN	NaN	NaN	NaN	NaN	NaN	NaN	NaN	NaN	NaN	NaN	NaN	NaN	NaN	NaN	NaN	NaN	NaN	NaN	NaN	NaN	NaN	NaN	NaN	NaN	NaN	NaN	NaN	NaN	NaN	NaN	NaN	NaN	NaN	NaN	NaN	NaN	NaN
1	NaN	A0A0G2JW29;G3V9N9;Q5D005	alpha-1,2-Mannosidase	Man1a1	2	82.162	25397000	2	NaN	NaN	NaN	NaN	NaN	NaN	NaN	NaN	NaN	NaN	NaN	NaN	NaN	NaN	NaN	NaN	NaN	NaN	NaN	NaN	NaN	NaN	NaN	NaN	NaN	NaN	NaN	NaN	NaN	NaN	NaN	NaN	NaN	NaN	NaN	NaN	NaN	NaN	NaN	NaN	NaN
1	NaN	A0A0G2JW34;D3ZV37			4	14.379	147620000	8	NaN	NaN	NaN	NaN	NaN	NaN	NaN	NaN	NaN	NaN	NaN	NaN	NaN	NaN	NaN	23.1548	23.1883	23.2774	NaN	NaN	NaN	NaN	NaN	NaN	NaN	NaN	NaN	NaN	NaN	NaN	NaN	NaN	NaN	NaN	NaN	NaN	NaN	NaN	NaN	NaN	NaN
0.0267795	-0.263749	A0A0G2JW38;Q3MIF0		Rpe	3	24.945	599850000	153	22.967	23.334	22.88	23.8862	24.1138	23.8494	22.9083	22.9849	22.9508	23.2647	22.9449	22.9368	23.0321	22.8515	22.6791	NaN	NaN	NaN	23.7539	23.2984	23.4192	22.6716	22.9716	23.3313	22.8882	22.668	NaN	23.7327	23.7	23.58	23.5956	23.471	23.5768	23.1807	22.7999	22.5544	NaN	22.73	22.7212	23.1556	23.5048
1	NaN	F1LTB9;A0A0G2JW64;B2RYC1;A0A0G2K0C5		Cdc40	1	38.468	21659000	2	NaN	NaN	NaN	NaN	NaN	NaN	NaN	NaN	NaN	NaN	NaN	NaN	NaN	NaN	NaN	NaN	NaN	NaN	NaN	NaN	NaN	NaN	NaN	NaN	NaN	NaN	NaN	NaN	NaN	NaN	NaN	NaN	NaN	NaN	NaN	NaN	NaN	NaN	NaN	NaN	NaN
0.0163229	0.206489	A0A0G2JW88			28	233.39	9581800000	863	26.964	26.9371	26.9834	26.7954	27.0434	27.1651	26.7752	26.807	26.7861	26.9083	26.8891	26.9844	27.207	27.295	27.1271	27.7378	27.7329	27.5356	26.4195	26.3564	26.4504	26.7012	26.7623	26.734	27.1793	27.0849	27.2054	26.8136	26.8788	26.8768	26.7184	26.8105	26.7854	27.0003	26.9869	26.9048	26.8811	26.9037	26.7962	26.9529	26.893
1	NaN	A0A0G2JW94			1	53.808	75509000	15	NaN	NaN	NaN	NaN	NaN	NaN	NaN	NaN	NaN	NaN	NaN	NaN	NaN	NaN	NaN	NaN	NaN	NaN	NaN	NaN	NaN	NaN	NaN	NaN	NaN	NaN	NaN	NaN	NaN	NaN	NaN	NaN	NaN	NaN	NaN	NaN	NaN	NaN	NaN	NaN	NaN
1	0.953329	A0A0G2JWA2;P24135	1-phosphatidylinositol 4,5-bisphosphate phosphodiesterase gamma-2	Plcg2	6	147.63	653930000	47	22.8584	NaN	NaN	NaN	22.8715	NaN	NaN	NaN	NaN	NaN	NaN	NaN	NaN	NaN	NaN	NaN	NaN	NaN	NaN	22.7322	NaN	22.7104	NaN	NaN	23.7285	24.5706	23.5846	NaN	NaN	NaN	NaN	NaN	NaN	NaN	NaN	NaN	NaN	NaN	NaN	NaN	23.2446
0.501616	-0.0494225	A0A0G2JWA3;F1LQM9		Xpo7	9	123.78	1126200000	203	24.0646	23.5843	23.7485	24.7022	24.5766	24.489	23.6896	23.7627	23.7509	23.8211	23.9057	23.8472	23.9983	23.9041	23.9505	NaN	NaN	NaN	24.1737	24.2593	24.2016	23.9611	23.8345	23.8923	24.0894	24.0391	24.1712	24.1275	23.8833	23.9427	24.2231	23.9599	24.0409	23.8509	23.831	23.6681	23.9457	23.8886	24.0394	24.1661	24.1287
0.0482632	-0.160706	A0A0G2JWA8;A0A0G2K9T4;M9MMM9;A0A0G2JU82;D3ZHV2	Microtubule-actin cross-linking factor 1	Macf1	15	830.73	459480000	143	22.6147	22.6415	22.4632	22.3676	23.0761	22.6431	22.8545	22.9645	22.5869	22.5333	22.5357	22.2621	22.725	22.8093	23.0403	NaN	NaN	NaN	NaN	23.0211	23.2225	22.4503	22.3614	22.5827	22.837	22.8783	23.0226	22.5152	22.9832	NaN	NaN	NaN	NaN	22.4411	22.4351	22.4281	22.8545	22.9925	22.9564	22.4858	22.5829
1	NaN	A0A0G2KAH2;A0A0G2JWB6			2	138.17	19235000	2	NaN	NaN	NaN	NaN	NaN	NaN	NaN	NaN	NaN	NaN	NaN	NaN	NaN	20.6324	NaN	NaN	NaN	NaN	NaN	NaN	NaN	NaN	NaN	NaN	NaN	NaN	NaN	NaN	NaN	NaN	NaN	NaN	NaN	NaN	NaN	NaN	NaN	NaN	NaN	NaN	NaN
5.91881e-05	-0.163006	Q5XI19;A0A0G2JWC7		Fermt2	40	77.875	35773000000	1438	28.7699	28.8009	28.7721	29.1752	29.1622	29.1737	28.9676	29.0159	28.9471	28.8522	28.8624	28.8222	28.8693	28.9225	28.8779	27.8169	27.8376	28.4392	28.9367	29.062	28.9385	28.6135	28.6275	28.6089	28.9136	28.896	28.8641	29.1955	29.267	29.2218	28.9093	28.9415	28.8915	29.0731	29.0783	29.0627	28.8696	28.9193	28.8325	29.1885	29.1284
0.828501	-0.0263928	A0A0G2JWD2;A0A3G2LW22;Q5XI81	Fragile X mental retardation syndrome-related protein 1	Fxr1	5	63.389	319710000	15	NaN	NaN	22.4504	NaN	NaN	NaN	NaN	NaN	NaN	22.4615	NaN	NaN	22.5358	22.4196	22.6344	NaN	NaN	NaN	NaN	NaN	NaN	NaN	22.4808	NaN	NaN	NaN	23.0438	NaN	NaN	22.1203	22.3318	NaN	NaN	21.9815	NaN	NaN	22.5471	NaN	22.5077	NaN	22.2961
0.929406	-0.00564283	A0A0G2JWD6;D3ZIF5;D4AE00		Ap3b1	16	121.5	1448200000	103	24.3119	24.4491	24.2834	24.8215	24.6735	24.7063	24.5649	24.2895	24.1935	24.0412	24.1113	24.1123	24.0425	24.1648	24.2734	NaN	NaN	NaN	24.4521	24.316	24.3944	24.3195	24.2308	24.263	24.2587	24.4134	24.5025	24.4052	24.3246	24.1006	24.0848	24.1345	24.1102	24.2978	24.122	24.2097	24.5775	24.2636	24.7059	24.5135	24.2397
1	NaN	A0A0G2JWF4;F1LR71;B1WC71		Aspscr1	1	48.177	51962000	1	NaN	NaN	NaN	NaN	NaN	NaN	NaN	NaN	NaN	NaN	NaN	NaN	NaN	NaN	NaN	NaN	NaN	NaN	NaN	NaN	NaN	NaN	NaN	NaN	NaN	NaN	NaN	NaN	NaN	NaN	NaN	NaN	NaN	NaN	NaN	NaN	NaN	NaN	NaN	NaN	NaN
0.331878	-0.112963	B4F7C9;A0A0G2JWH5		Stt3a	9	80.597	1499900000	169	24.5465	24.4356	24.653	24.7403	24.7005	24.7045	24.4454	24.2732	24.5415	23.0246	23.9853	23.3382	24.2959	24.3647	24.3939	NaN	NaN	23.8567	24.5956	24.7592	24.769	25.0254	25.0256	25.099	23.8006	23.7929	24.125	24.3574	24.4147	24.4757	24.5692	25.0217	24.9366	24.8298	24.897	24.7429	24.3322	24.2215	24.1829	24.7048	24.5955
0.982126	0.00205943	A0A0G2JWJ0;Q10728;D3ZR53;D4ACS0;D4A1S6	Protein phosphatase 1 regulatory subunit 12A;Protein phosphatase 1 regulatory subunit	Ppp1r12a	48	115.27	17410000000	934	27.644	27.6553	27.7242	28.1232	27.8947	27.8262	27.7778	27.8145	27.8309	27.8789	27.8477	27.9311	27.956	27.9488	27.9583	27.9777	27.8071	28.0471	27.3529	27.3148	27.543	27.7649	27.7417	27.8266	27.9981	27.8199	27.9982	27.8315	27.892	27.79	27.4336	27.715	27.553	27.9661	27.9411	27.9252	27.7195	27.733	27.7125	27.9302	27.9303
1	NaN	B1WBR1;A0A0G2JWJ7;O35254;A0JN16	Golgi reassembly-stacking protein 1	Gorasp1	4	47.052	145530000	46	NaN	21.7885	21.4886	NaN	NaN	NaN	NaN	NaN	NaN	21.8975	NaN	22.1481	21.7964	NaN	NaN	NaN	NaN	NaN	NaN	NaN	NaN	NaN	NaN	NaN	NaN	NaN	NaN	NaN	NaN	NaN	NaN	NaN	NaN	NaN	NaN	NaN	NaN	NaN	NaN	NaN	NaN
1	NaN	A0A0G2JWM2;Q5RJQ4	NAD-dependent protein deacetylase sirtuin-2	Sirt2	2	43.163	263940000	4	NaN	NaN	NaN	23.0816	NaN	NaN	NaN	NaN	NaN	NaN	NaN	NaN	NaN	NaN	NaN	NaN	NaN	NaN	NaN	NaN	NaN	NaN	NaN	22.27	NaN	NaN	NaN	NaN	NaN	NaN	NaN	NaN	NaN	NaN	NaN	NaN	NaN	NaN	NaN	NaN	NaN
0.452966	0.0810712	A0A0G2JWP1;B4F7F1;A0A0G2K6F9;M0R6B9;B5DFH8		Cstf2	7	55.549	197200000	55	21.8811	NaN	NaN	NaN	NaN	NaN	NaN	21.8295	21.8561	21.8772	22.3537	NaN	NaN	21.789	22.2376	NaN	NaN	NaN	21.8912	NaN	NaN	NaN	21.886	21.8317	22.2382	NaN	22.2522	NaN	NaN	NaN	NaN	NaN	NaN	21.5552	22.1466	21.9431	21.8972	21.783	NaN	NaN	21.6768
1	NaN	A0A0G2JWQ7;Q9JJ05	Glycoprotein-N-acetylgalactosamine 3-beta-galactosyltransferase 1	C1galt1	4	45.432	192650000	9	NaN	NaN	NaN	NaN	NaN	NaN	NaN	NaN	NaN	NaN	NaN	NaN	NaN	NaN	NaN	NaN	NaN	NaN	NaN	NaN	NaN	NaN	NaN	22.2457	NaN	NaN	NaN	NaN	NaN	NaN	NaN	22.6278	22.5508	NaN	NaN	NaN	NaN	NaN	NaN	NaN	NaN
0.0458605	-0.35169	A0A0G2JWR5;A0A0G2JZ19;B2RYG5;D3ZSS1		Taf15	5	58.475	905520000	51	23.1155	23.5072	NaN	23.8117	24.2462	24.1336	NaN	23.4361	23.7727	23.7244	23.9556	23.6813	NaN	23.9573	23.5302	NaN	NaN	NaN	24.368	24.2445	24.4998	23.4923	23.2147	23.2879	23.2936	NaN	23.4099	NaN	NaN	23.9858	24.1686	24.447	24.3719	23.9195	23.5669	23.9281	23.694	23.622	NaN	24.2279	23.6599
0.0253717	-0.197711	F1LNX8;A0A0G2JWT4		Cmah	11	66.63	1507400000	116	24.3085	24.0157	24.2722	24.9691	24.683	24.5966	24.2494	24.345	24.1622	24.4478	24.6263	24.3857	24.1999	24.1308	24.0099	NaN	NaN	NaN	24.7112	24.7943	24.52	24.3081	24.3995	24.38	23.75	23.9437	23.9669	24.685	24.9252	24.9959	24.3318	24.2819	24.3054	24.3804	24.5249	24.4775	24.4917	24.3972	24.487	24.0812	23.999
1	NaN	A0A0G2JWV8;F1LXS6;A0A0G2K0L6		Thoc7	2	26.201	0	2	NaN	NaN	NaN	NaN	NaN	NaN	NaN	NaN	NaN	NaN	NaN	NaN	NaN	NaN	NaN	NaN	NaN	NaN	NaN	NaN	NaN	NaN	NaN	NaN	NaN	NaN	NaN	NaN	NaN	NaN	NaN	NaN	NaN	NaN	NaN	NaN	NaN	NaN	NaN	NaN	NaN
0.386841	-0.115746	A0A0G2JWX9			49	99.826	49979000000	1753	29.0491	29.0854	29.124	29.7268	29.7687	29.7802	29.5612	29.5467	29.6571	29.1325	29.132	29.0927	29.57	29.6011	29.572	28.6159	28.7272	28.6521	30.1944	30.1448	30.1301	29.5085	29.5001	29.5822	29.7883	29.7315	29.7962	28.8218	28.852	28.8687	29.9427	29.7972	29.9738	29.3939	29.4579	29.4583	29.5168	29.5178	29.5708	28.9596	28.9191
0.000894953	-0.275741	A0A0G2JWZ2;Q7TP38;Q5FVM2;A0A096MKF4		Psme3	23	151.65	5105800000	389	26.1048	26.1891	26.1426	26.2701	26.3886	26.0883	26.264	26.2997	26.3038	25.0992	24.9969	25.1268	25.715	25.6865	25.7423	25.8027	25.363	25.0408	26.1301	26.1294	26.1594	26.5294	26.3678	26.5354	25.8159	25.8796	25.8087	26.4397	26.6523	26.5096	26.0781	26.0342	26.1005	25.891	25.8692	25.9294	25.9632	25.8593	26.0104	26.0869	26.0635
1	NaN	A0A0G2JX16			1	86.514	0	8	NaN	NaN	NaN	NaN	NaN	NaN	NaN	NaN	NaN	NaN	NaN	NaN	NaN	NaN	NaN	NaN	NaN	NaN	NaN	NaN	NaN	NaN	NaN	NaN	NaN	NaN	NaN	NaN	NaN	NaN	NaN	NaN	NaN	NaN	NaN	NaN	NaN	NaN	NaN	NaN	NaN
1	NaN	Q5FVP6;A0A0G2JX25		Gmpr2	2	31.184	127910000	8	NaN	NaN	NaN	NaN	NaN	NaN	NaN	NaN	NaN	NaN	NaN	NaN	NaN	NaN	NaN	NaN	NaN	NaN	NaN	NaN	NaN	NaN	NaN	NaN	NaN	NaN	NaN	NaN	NaN	NaN	NaN	NaN	NaN	NaN	NaN	NaN	NaN	NaN	NaN	NaN	NaN
0.166769	-0.17608	D4A2N1;A0A0G2JX45	Arginyl-tRNA--protein transferase 1	Ate1	5	58.216	458050000	54	22.8242	22.8703	22.9447	NaN	NaN	23.8556	22.7381	22.8658	22.9279	22.6824	22.6171	23.137	22.5938	22.7722	22.75	NaN	NaN	NaN	NaN	NaN	NaN	22.4856	NaN	22.6381	22.8141	22.9205	23.0353	NaN	23.3166	23.6352	NaN	22.6058	NaN	22.7003	22.7392	22.4502	22.9805	22.5277	22.2285	22.9284	22.726
0.0836671	0.160638	A0A0G2JX72;F1M9N4;D3ZQV3		Mbnl1	7	47.203	899010000	86	23.5907	23.8997	23.6502	NaN	NaN	NaN	23.5371	23.3715	23.3362	23.7733	23.673	23.8432	23.7795	23.8131	23.9965	23.3668	24.1916	23.7299	23.4733	23.3616	23.5789	23.5187	23.4947	23.7908	24.1034	23.5729	23.8745	NaN	23.5989	NaN	24.0426	24.1153	24.11	24.066	23.9773	23.7351	23.7729	23.7731	24.0484	23.9588	23.7046
1	NaN	A0A0G2JX74;P42346	Serine/threonine-protein kinase mTOR	Mtor	4	288.26	727440000	14	NaN	NaN	NaN	NaN	NaN	NaN	NaN	NaN	NaN	NaN	23.1669	NaN	23.5608	23.4689	23.502	NaN	NaN	NaN	NaN	NaN	NaN	23.6217	NaN	NaN	NaN	23.6341	23.5136	NaN	NaN	NaN	NaN	NaN	NaN	NaN	NaN	NaN	NaN	NaN	NaN	NaN	NaN
1	NaN	A0A0G2JX77;F1LSM3;A0A0G2K7S6;Q9R037	WD repeat-containing protein 44	Wdr44	3	86.865	31570000	6	NaN	NaN	NaN	NaN	NaN	NaN	NaN	NaN	NaN	NaN	NaN	NaN	NaN	NaN	NaN	NaN	NaN	NaN	NaN	NaN	NaN	NaN	NaN	NaN	NaN	NaN	NaN	NaN	NaN	NaN	NaN	NaN	NaN	NaN	NaN	NaN	NaN	NaN	NaN	NaN	NaN
0.973374	0.00477502	Q4V7D1;A0A0G2K075;A0A0G2JX79;A0A0G2JXS8;Q7TPJ0	Translocon-associated protein subunit alpha	Ssr1	3	32.207	1824600000	115	24.8235	25.0494	24.7539	25.0729	25.0446	25.135	25.3974	25.1292	25.2332	23.6869	24.0822	23.4801	24.6137	24.6113	24.9163	NaN	NaN	NaN	24.7128	24.2739	24.1628	24.8963	25.18	24.9096	24.4318	24.2122	24.2255	25.5016	25.4927	25.0261	23.9983	NaN	NaN	25.0922	25.1955	25.1246	24.0951	24.4721	24.6484	25.3968	25.2379
1	0.0246792	Q5XIW9;A0A0G2JXA8;Q9Z2S9	Flotillin-2	Flot2	4	38.717	131990000	11	NaN	21.6017	NaN	NaN	NaN	NaN	NaN	NaN	21.6394	21.8311	21.4967	21.7078	NaN	NaN	NaN	NaN	NaN	NaN	21.1976	NaN	NaN	NaN	NaN	NaN	NaN	NaN	NaN	NaN	21.2031	21.1734	NaN	NaN	NaN	NaN	NaN	NaN	NaN	NaN	NaN	NaN	NaN
0.0716478	-0.196781	A0A0G2JXB1;V5QRT9;V5QQQ4;V5QQP9;A0A0G2JXN6;P08699;V5QR27;V5QSV9;V5QQW0	Galectin;Galectin-3	Lgals3	16	26.335	50704000000	926	29.1147	29.1266	29.2818	29.6371	29.8403	29.8463	29.4406	29.4697	29.51	29.4576	29.5691	29.4858	29.1028	29.1793	28.9922	28.6761	29.5565	29.7665	29.9929	29.9881	30.0263	29.2974	29.3154	29.2564	29.4867	29.3955	29.5109	29.5496	29.5923	29.6002	29.8188	29.8252	29.8171	29.3792	29.3707	29.3964	29.4538	29.5085	29.5088	29.7899	29.7896
1	NaN	A0A0G2JXF0;A0A0G2K3L5			1	11.801	10643000	5	NaN	NaN	NaN	NaN	NaN	NaN	NaN	NaN	NaN	NaN	NaN	NaN	NaN	NaN	NaN	NaN	NaN	NaN	NaN	NaN	NaN	NaN	NaN	NaN	NaN	NaN	NaN	NaN	NaN	NaN	NaN	NaN	NaN	NaN	NaN	NaN	NaN	NaN	20.5144	NaN	NaN
1	NaN	A0A0G2JXG3			1	41.095	16073000	19	NaN	NaN	NaN	NaN	NaN	NaN	NaN	NaN	NaN	NaN	NaN	NaN	NaN	NaN	NaN	NaN	NaN	NaN	NaN	NaN	NaN	NaN	NaN	NaN	NaN	NaN	NaN	NaN	NaN	NaN	NaN	NaN	NaN	NaN	NaN	NaN	NaN	NaN	NaN	NaN	NaN
0.874048	0.0317338	G3V8B3;A0A0G2JXI9;G3V9C7;M0R4L7;A0A0G2JXE0;D3ZNH4;Q00715;Q00729;A0A0G2K7R1;Q9Z2R0;Q7M0A0	Histone H2B;Histone H2B type 1;Histone H2B type 1-A	LOC100910200;Hist1h2bk;Hist1h2bl;Hist1h2bo;Hist1h2ba	25	13.906	180120000000	758	32.3304	32.3483	32.3301	30.1945	30.1625	29.9908	31.6682	31.5049	31.4826	30.4794	30.4279	30.5292	31.6813	31.5814	31.645	31.902	31.9914	32.1466	31.4613	31.4686	31.4107	31.9386	32.0972	32.1435	30.8864	30.8141	30.8793	31.1395	31.4385	31.0393	31.6576	31.7412	31.6429	31.8266	31.7354	31.8243	30.7889	30.8245	30.771	30.6181	30.7098
1	NaN	A0A0G2JXJ7			1	121.1	362420000	3	NaN	NaN	NaN	NaN	NaN	NaN	NaN	NaN	NaN	NaN	NaN	NaN	NaN	NaN	NaN	NaN	NaN	NaN	NaN	NaN	NaN	NaN	NaN	NaN	NaN	NaN	NaN	NaN	NaN	NaN	NaN	NaN	NaN	NaN	NaN	NaN	NaN	NaN	NaN	NaN	NaN
1	0.063261	A0A0G2JXK7;Q68FS3	F-box only protein 7	Fbxo7	3	47.144	95792000	18	NaN	NaN	NaN	NaN	NaN	NaN	NaN	NaN	NaN	21.3442	21.263	21.3365	NaN	NaN	NaN	NaN	NaN	NaN	NaN	NaN	NaN	NaN	NaN	20.9034	NaN	NaN	21.366	NaN	NaN	NaN	NaN	NaN	NaN	NaN	21.3829	21.2776	NaN	NaN	NaN	NaN	NaN
1	NaN	A0A0G2K481;A0A0G2JXL6;Q9R095	Sperm flagellar protein 2	Spef2	2	201.72	69501000	1	NaN	NaN	NaN	NaN	NaN	NaN	NaN	NaN	NaN	NaN	NaN	NaN	NaN	NaN	NaN	NaN	NaN	NaN	NaN	NaN	NaN	NaN	NaN	NaN	NaN	NaN	NaN	NaN	NaN	NaN	NaN	NaN	NaN	NaN	NaN	NaN	NaN	NaN	NaN	NaN	NaN
1	-0.0966282	A0A0G2JXM0;D3ZVL1;D3ZHI1;A0A0G2KA58;A0A0G2K2J9		Ctage5	4	85.653	165410000	35	NaN	NaN	22.0876	NaN	NaN	NaN	NaN	NaN	NaN	NaN	NaN	NaN	NaN	22.0706	NaN	NaN	NaN	NaN	NaN	NaN	NaN	22.3771	22.1402	NaN	NaN	NaN	NaN	NaN	NaN	NaN	NaN	NaN	NaN	NaN	NaN	NaN	NaN	NaN	NaN	21.9978	NaN
1	NaN	F1LRN8;A0A0G2JXP3;D7NIW0		Nedd4l	2	110.79	490240000	50	NaN	NaN	NaN	NaN	NaN	NaN	NaN	NaN	NaN	NaN	NaN	NaN	NaN	NaN	NaN	NaN	NaN	NaN	NaN	NaN	NaN	NaN	NaN	NaN	NaN	NaN	NaN	NaN	NaN	NaN	NaN	22.8387	NaN	NaN	NaN	NaN	NaN	NaN	NaN	NaN	NaN
0.291381	-0.066257	A0A0G2JXT3;F1LND7;P05369;Q7TPK0	Farnesyl pyrophosphate synthase	Fdps	16	48.658	6440400000	433	26.3364	26.1504	26.2498	26.8316	26.7897	26.7178	26.6738	26.4838	26.5596	26.7515	26.5262	26.5636	26.4577	26.392	26.5168	26.5388	26.7674	26.6733	26.8964	26.5588	26.7102	26.5051	26.4009	26.4317	26.5296	26.6466	26.4828	26.3045	26.0859	26.1886	26.5839	26.4943	26.4923	26.5727	26.6204	26.3821	26.6413	26.5797	26.4945	26.6713	26.7645
0.39495	-0.0834875	A0A0G2JXT6;D3ZC22		Mtmr6	7	75.576	359910000	34	22.447	NaN	NaN	NaN	NaN	NaN	22.5614	22.4623	22.21	NaN	NaN	NaN	22.5237	22.6888	22.5156	NaN	NaN	NaN	NaN	23.0576	NaN	NaN	NaN	NaN	NaN	22.5161	NaN	NaN	NaN	22.7597	NaN	NaN	NaN	22.7224	NaN	22.3809	22.2458	22.5005	NaN	22.7643	22.4252
0.182749	0.0684213	D4A8D5;A0A0G2JXT8		Flnb	105	275.31	42566000000	3041	29.0934	29.1426	29.0896	29.2732	29.3211	29.2779	29.2036	29.2513	29.2075	29.1376	29.2051	29.1437	29.2826	29.3105	29.2801	27.9016	27.2597	28.054	29.2246	29.2172	29.2316	29.0075	29.0472	29.0251	29.3352	29.298	29.2944	29.2935	29.2331	29.2273	29.0744	29.1236	29.035	28.9491	28.9902	28.9383	29.1457	29.1061	29.0978	29.3013	29.3404
1	NaN	A0A0G2JXT9			2	222.02	10414000	3	NaN	NaN	NaN	NaN	NaN	NaN	NaN	NaN	NaN	NaN	NaN	NaN	NaN	NaN	NaN	NaN	NaN	NaN	NaN	NaN	NaN	NaN	NaN	NaN	NaN	NaN	NaN	NaN	NaN	NaN	NaN	NaN	NaN	NaN	NaN	NaN	NaN	NaN	NaN	NaN	NaN
0.00276667	0.185376	A0A0G2JXW4			16	34.384	9762600000	384	26.9738	26.7466	27.0828	27.2343	27.2613	27.3471	26.7316	26.748	26.6326	27.2296	27.1604	27.1232	27.3214	27.1544	27.131	26.8624	26.7387	27.1049	27.0592	26.8939	27.1251	27.0368	26.942	26.9402	27.2548	27.2965	27.2717	27.186	27.1255	27.1032	27.0994	26.9653	26.9768	26.7903	27.0778	27.0418	26.9765	27.0201	26.9857	27.5572	27.3577
1	NaN	F1LQ45;A0A0G2JXY9;Q505I9;Q9Z1Z3	Epsin-2	Epn2	1	62.315	0	1	NaN	NaN	NaN	NaN	NaN	NaN	NaN	NaN	NaN	NaN	NaN	NaN	NaN	NaN	NaN	NaN	NaN	NaN	NaN	NaN	NaN	NaN	NaN	NaN	NaN	NaN	NaN	NaN	NaN	NaN	NaN	NaN	NaN	NaN	NaN	NaN	NaN	NaN	NaN	NaN	NaN
0.468079	-0.1036	A0A0G2JY07;B2GUX3;E9PTS4	DNA helicase	Mcm5	5	82.467	281650000	36	NaN	22.2035	NaN	NaN	NaN	NaN	22.6293	22.4489	22.6781	22.989	NaN	22.7142	21.948	22.4694	NaN	NaN	NaN	NaN	22.6967	NaN	NaN	22.1303	22.1856	NaN	NaN	NaN	22.7804	NaN	NaN	22.0062	NaN	NaN	22.5748	NaN	22.744	22.7687	NaN	NaN	22.2525	22.5566	22.3814
0.202915	0.113955	A0A0G2JY08;D3ZFD0;Q3B8R3		Myo18a	28	233.38	1260400000	200	24.2141	24.2655	24.1638	23.9213	24.3222	23.6941	24.3361	24.1622	24.0888	24.414	24.3109	24.2225	24.1385	24.0129	24.085	NaN	NaN	NaN	23.9446	23.9083	24.223	24.2378	23.9261	24.015	24.3147	24.0766	24.3804	23.8766	23.7982	24.4186	23.9287	24.3449	23.7341	24.1262	24.1896	24.0356	NaN	23.4645	NaN	24.3766	24.1102
1	NaN	A0A0G2JY18;Q9JLT3;Q498U6		Dffa	2	35.704	46665000	7	NaN	NaN	NaN	NaN	NaN	NaN	NaN	NaN	NaN	NaN	NaN	NaN	NaN	NaN	NaN	NaN	NaN	NaN	NaN	NaN	NaN	NaN	NaN	NaN	NaN	NaN	NaN	NaN	NaN	NaN	NaN	NaN	NaN	NaN	NaN	NaN	NaN	NaN	NaN	NaN	NaN
0.0601769	0.0913841	G3V9W6;A0A0G2JY43;P30839;P11883	Aldehyde dehydrogenase;Fatty aldehyde dehydrogenase	Aldh3a2	15	54.107	3225400000	285	25.3747	25.5604	25.4157	25.4534	25.539	25.4369	25.4454	25.3843	25.4161	25.3097	25.2613	25.2333	25.2781	25.4422	25.4431	25.2151	24.7265	25.2141	25.3221	25.2982	25.5065	25.6194	25.7342	25.6652	25.5136	25.5365	25.4399	25.8917	25.9008	25.7627	25.3539	25.3134	25.2157	25.4574	25.462	25.5991	25.1694	25.2113	25.2837	25.9744	25.9783
0.00387916	-0.31753	F1MAJ0;B2B9B0;A0A0G2JY48;P09759;F1LQK6;D3ZBN3;D3ZZK3;M0RDA4;P54759;P54758	Receptor protein-tyrosine kinase;Ephrin type-B receptor 1	Ephb2;Ephb1	4	107.47	176100000	33	NaN	21.771	NaN	NaN	NaN	NaN	21.8775	21.8821	NaN	NaN	NaN	NaN	NaN	21.5863	NaN	NaN	NaN	NaN	NaN	NaN	21.9744	NaN	NaN	21.8568	NaN	NaN	NaN	NaN	NaN	NaN	22.0775	NaN	NaN	NaN	NaN	NaN	NaN	21.607	NaN	NaN	21.8062
0.31478	-0.0828071	A0A0G2JY69;G3V907;Q9QYU1	Peroxisomal biogenesis factor 19	LOC100911356;Pex19	4	31.861	1343700000	84	24.4208	24.5935	24.3377	24.4417	24.2662	24.5052	24.5016	24.2958	24.7792	24.2102	24.2998	NaN	24.4553	24.3069	24.2711	NaN	NaN	NaN	24.5195	NaN	24.437	24.5745	NaN	24.4563	24.5232	24.6527	24.3324	NaN	24.4828	24.4798	NaN	NaN	24.357	24.2773	24.2098	NaN	24.296	NaN	24.5339	24.4413	24.6628
1	NaN	D4A554;A0A0G2JY73		Eif4g3	4	175.43	45643000	3	NaN	NaN	NaN	NaN	NaN	NaN	NaN	NaN	NaN	NaN	NaN	NaN	NaN	NaN	NaN	NaN	NaN	NaN	NaN	NaN	NaN	NaN	NaN	NaN	NaN	NaN	NaN	NaN	NaN	NaN	NaN	NaN	NaN	NaN	NaN	NaN	NaN	NaN	NaN	NaN	NaN
0.859062	-0.0161709	A0A0G2K1I6;A0A0G2JY82;P56603;Q5D009	Secretory carrier-associated membrane protein 1	Scamp1	4	33.955	757460000	106	23.3681	23.5669	NaN	NaN	24.0398	23.6362	23.2763	23.243	23.5169	23.666	23.4754	23.4866	23.4784	23.5017	23.3112	NaN	NaN	NaN	23.84	23.4394	23.4443	23.5665	23.6422	23.9183	23.1089	22.8612	23.2967	23.3016	23.0497	22.8521	23.7001	23.3719	23.2679	23.7831	23.2866	23.4531	23.7969	23.3033	23.5686	23.2561	23.5464
0.392289	-0.0880361	A0A0G2JYA2;Q9JHU5	Arfaptin-1	Arfip1	13	41.432	2638200000	77	24.9028	24.7811	24.7544	24.9355	25.1275	25.0955	25.2085	25.3002	25.2363	24.133	25.5161	25.4241	25.3068	25.2793	25.2468	24.6482	25.7633	25.4808	NaN	25.5331	25.6355	25.4415	25.2645	25.6224	25.2738	25.3982	25.2689	25.3779	25.0241	25.2014	24.9263	24.8515	25.0205	25.1454	25.6244	25.3465	25.4297	25.3877	24.5822	25.172	25.1456
0.0685904	-0.20367	A0A0G2JYC2;P0C588;Q5U2P1	Metal transporter CNNM4	Cnnm4	7	84.061	822360000	26	23.1081	23.0186	23.4634	24.2485	24.4182	23.6926	23.6425	23.8133	23.8982	23.5706	23.5966	23.6619	23.3462	23.4717	23.3608	NaN	NaN	NaN	23.6961	NaN	NaN	NaN	23.5352	NaN	NaN	23.7716	NaN	23.7265	23.3047	23.9432	23.4585	23.1125	23.6413	23.478	23.4174	NaN	NaN	NaN	NaN	NaN	NaN
0.102722	0.12377	E9PTR4;A0A0G2JYC6;Q4V8A7		Ubap2l	8	116.86	748540000	95	23.4543	23.2932	23.3675	23.7389	23.9697	23.4446	23.1183	23.0619	23.0878	23.5431	23.3129	23.5334	23.1185	23.5395	23.2042	NaN	NaN	NaN	23.2289	23.6359	23.5142	23.7351	23.7075	23.6431	23.0105	23.3287	23.5104	23.0031	NaN	23.1224	23.1505	23.6281	23.2011	23.4859	23.2412	23.3683	23.2286	23.4918	23.4765	23.4561	23.9908
1	NaN	A0A0G2JYC7;Q925G1	Hepatoma-derived growth factor-related protein 2	Hdgfrp2	2	71.893	37220000	40	NaN	NaN	NaN	NaN	NaN	NaN	NaN	NaN	NaN	NaN	NaN	NaN	NaN	NaN	NaN	NaN	NaN	NaN	NaN	NaN	NaN	NaN	NaN	NaN	NaN	NaN	NaN	NaN	NaN	NaN	NaN	NaN	NaN	NaN	NaN	NaN	NaN	NaN	NaN	NaN	NaN
0.581169	0.130054	A0A0G2JYD1;A0A0U1RRQ3;A0A0G2JYI7			4	117.73	82272000	34	NaN	21.54	NaN	NaN	NaN	NaN	21.5505	NaN	21.4049	NaN	NaN	NaN	NaN	21.7764	NaN	NaN	NaN	NaN	NaN	NaN	NaN	NaN	NaN	NaN	21.0505	NaN	NaN	NaN	NaN	NaN	NaN	NaN	NaN	NaN	NaN	NaN	NaN	21.7148	NaN	21.6671	NaN
1	-0.233228	A0A0G2JYD4;D3ZKC6		Vps13d	3	487.85	159720000	8	NaN	NaN	NaN	NaN	NaN	NaN	NaN	NaN	NaN	NaN	NaN	NaN	NaN	NaN	NaN	NaN	NaN	NaN	NaN	NaN	NaN	NaN	NaN	NaN	NaN	NaN	NaN	NaN	NaN	NaN	NaN	NaN	NaN	22.5922	22.4437	NaN	NaN	NaN	NaN	NaN	NaN
1	NaN	B3DMA1;A0A0G2JYE0		Atxn2l	6	112.85	197370000	13	NaN	NaN	NaN	NaN	NaN	NaN	NaN	NaN	NaN	NaN	NaN	NaN	NaN	NaN	NaN	NaN	NaN	NaN	NaN	21.7572	21.8915	NaN	NaN	NaN	NaN	NaN	NaN	NaN	22.2278	22.4211	NaN	NaN	NaN	NaN	NaN	NaN	NaN	NaN	NaN	NaN	NaN
0.026135	0.183262	A0A0G2JYI0;A0A0G2JYR4;F1LZG6;F1M3T7		Lrba	25	309.45	1840700000	341	24.7672	24.5577	24.8489	23.0092	23.4969	22.8764	24.5822	24.7043	24.6896	24.8156	24.8442	24.7128	24.7582	24.9021	24.9958	NaN	NaN	NaN	24.7164	24.73	24.9375	24.9502	25.1216	24.8822	24.9502	24.9737	25.0712	23.8269	24.2255	23.8229	24.5054	24.9758	24.8505	24.7249	24.8034	24.7524	25.0586	25.0752	25.2526	24.1671	23.9627
1	NaN	Q4QR81;A0A0G2JYJ7		Rbms2	1	40.605	59712000	10	NaN	NaN	NaN	NaN	NaN	NaN	NaN	NaN	NaN	NaN	NaN	NaN	NaN	NaN	NaN	NaN	NaN	NaN	NaN	NaN	NaN	NaN	NaN	NaN	NaN	NaN	NaN	NaN	NaN	NaN	NaN	NaN	NaN	NaN	NaN	NaN	NaN	NaN	NaN	NaN	NaN
1	NaN	A0A0G2JYK0;F1LM05;Q7TMB9;A0A0G2K1T8		LOC299282	1	67.982	58509000	36	NaN	NaN	NaN	NaN	NaN	NaN	NaN	NaN	NaN	NaN	NaN	NaN	NaN	NaN	NaN	NaN	NaN	NaN	NaN	NaN	NaN	NaN	NaN	NaN	NaN	NaN	NaN	NaN	NaN	NaN	NaN	NaN	NaN	NaN	NaN	NaN	NaN	NaN	NaN	NaN	NaN
1	NaN	A0A0G2JYN0;Q5U2M6	DDB1- and CUL4-associated factor 8	Dcaf8	5	64.307	495520000	19	NaN	NaN	NaN	NaN	NaN	NaN	NaN	NaN	NaN	NaN	NaN	NaN	NaN	NaN	NaN	NaN	NaN	NaN	23.8012	NaN	24.2116	NaN	NaN	NaN	NaN	NaN	NaN	NaN	NaN	NaN	NaN	NaN	NaN	NaN	NaN	NaN	NaN	NaN	NaN	NaN	23.8426
0.594239	-0.0763109	A0A0G2JYN7;Q4KLH4	Paraspeckle component 1	Pspc1	4	52.879	376090000	33	NaN	NaN	NaN	NaN	NaN	NaN	22.4297	22.4693	22.2932	22.264	22.5462	22.6329	22.4783	23.2067	23.0852	NaN	NaN	NaN	23.2077	23.0181	22.7158	NaN	NaN	22.7981	23.0231	22.6848	22.8373	NaN	NaN	NaN	22.5641	22.7211	22.8976	22.3138	22.4763	NaN	NaN	22.7116	22.7054	NaN	NaN
1	NaN	A0A0G2K678;A0A0G2JYQ3;F1LQJ1;P0CB49	YLP motif-containing protein 1	Ylpm1	2	237.81	62602000	9	NaN	NaN	NaN	NaN	NaN	NaN	NaN	NaN	NaN	NaN	NaN	NaN	NaN	NaN	NaN	NaN	NaN	NaN	NaN	NaN	NaN	NaN	NaN	NaN	NaN	NaN	NaN	NaN	NaN	NaN	NaN	NaN	NaN	NaN	NaN	NaN	NaN	NaN	NaN	NaN	NaN
1	NaN	A0A0G2JYR1;B5DEY3		Exoc6b	2	94.189	30460000	1	NaN	NaN	NaN	NaN	NaN	NaN	NaN	NaN	NaN	NaN	21.1959	NaN	NaN	NaN	NaN	NaN	NaN	NaN	NaN	NaN	NaN	NaN	NaN	NaN	NaN	NaN	NaN	NaN	NaN	NaN	NaN	NaN	NaN	NaN	NaN	NaN	NaN	NaN	NaN	NaN	NaN
1	NaN	A0A0G2KAL4;A0A0G2JYS1;A0A0G2JZ50;A0A0G2K7Y2;Q4V8B0	Oxidation resistance protein 1	Oxr1	3	84.125	68624000	8	NaN	NaN	NaN	NaN	NaN	NaN	NaN	NaN	NaN	NaN	NaN	NaN	NaN	NaN	NaN	NaN	NaN	NaN	NaN	NaN	NaN	NaN	NaN	NaN	NaN	NaN	NaN	NaN	NaN	NaN	NaN	NaN	NaN	NaN	NaN	NaN	NaN	NaN	NaN	NaN	NaN
0.360272	-0.0818166	Q6P727;A0A0G2JYS4;D4A5V8;P49186;A0A0U1RRS7;A0A0U1RVI2;P49187	Mitogen-activated protein kinase;Mitogen-activated protein kinase 9	Mapk9	3	43.905	476180000	73	NaN	22.9803	22.869	23.423	23.1906	23.3215	NaN	22.9882	22.9748	22.7704	22.6777	22.6656	23.0752	NaN	22.9504	NaN	NaN	NaN	NaN	22.8545	NaN	NaN	22.8014	22.537	22.8092	22.6806	NaN	22.9675	23.0442	22.7857	22.6599	NaN	NaN	22.7935	22.5957	22.7561	22.9605	22.7858	22.873	23.0475	22.7891
0.313294	-0.109531	A0A0G2JYT1;F1LPE9;Q811U3;A0A0G2K140;D3ZMM4;Q8K3M6	ELKS/Rab6-interacting/CAST family member 1	Erc1	7	128.32	682540000	80	NaN	NaN	NaN	23.72	NaN	23.6381	24.0341	23.9823	NaN	NaN	NaN	NaN	23.6338	23.867	23.9057	NaN	NaN	NaN	NaN	NaN	NaN	NaN	24.0479	NaN	24.3899	NaN	NaN	NaN	23.8592	NaN	23.9458	NaN	23.9205	24.4684	23.798	24.5314	23.7578	23.7071	NaN	24.1899	24.0984
1	NaN	A0A0G2JYU2;Q5XIE3	39S ribosomal protein L11, mitochondrial	Mrpl11	3	20.75	72157000	3	NaN	NaN	NaN	NaN	NaN	NaN	NaN	NaN	NaN	22.1619	NaN	NaN	NaN	NaN	NaN	NaN	NaN	NaN	NaN	NaN	NaN	NaN	NaN	NaN	NaN	NaN	NaN	NaN	NaN	NaN	NaN	NaN	NaN	NaN	NaN	NaN	NaN	NaN	NaN	NaN	NaN
1	NaN	A0A0G2JZ38			1	126.47	948630	3	NaN	NaN	NaN	NaN	NaN	NaN	NaN	NaN	NaN	NaN	NaN	NaN	NaN	NaN	NaN	NaN	NaN	NaN	NaN	NaN	NaN	NaN	NaN	NaN	NaN	19.6473	NaN	NaN	NaN	NaN	NaN	NaN	NaN	NaN	NaN	NaN	NaN	NaN	NaN	NaN	NaN
1	NaN	A0A0G2JZ48;A0A0G2K8G1;A0A0G2JYB3;Q9QYA5		Tmf1	7	121.9	188200000	16	NaN	NaN	NaN	NaN	NaN	NaN	NaN	NaN	NaN	NaN	NaN	NaN	NaN	NaN	NaN	NaN	NaN	NaN	NaN	NaN	NaN	NaN	NaN	NaN	NaN	NaN	NaN	NaN	NaN	NaN	NaN	NaN	NaN	NaN	NaN	NaN	NaN	NaN	NaN	NaN	NaN
0.0781044	0.25032	F1LY70;A0A0G2JZ53		Birc6	7	433.19	243680000	50	NaN	22.5066	22.1226	22.4763	22.694	NaN	21.6437	21.698	22.0513	22.0228	22.6808	NaN	22.3041	NaN	22.1879	NaN	NaN	NaN	NaN	NaN	22.1374	22.249	23.0042	21.9279	NaN	22.2489	NaN	21.1968	21.003	NaN	21.857	22.3006	22.3383	NaN	NaN	21.8322	NaN	NaN	NaN	21.8406	21.6286
1	NaN	A0A0G2JZ57;M0RAF9;Q8R4C1	Calcium-transporting ATPase;Calcium-transporting ATPase type 2C member 2	Atp2c2	3	85.52	33919000	11	NaN	NaN	NaN	NaN	NaN	NaN	NaN	NaN	NaN	NaN	NaN	NaN	NaN	NaN	NaN	NaN	NaN	NaN	NaN	NaN	NaN	NaN	NaN	NaN	NaN	NaN	NaN	NaN	NaN	NaN	NaN	NaN	NaN	NaN	NaN	NaN	NaN	NaN	NaN	NaN	NaN
1	NaN	A0A0G2JZ60			2	57.114	14227000	12	NaN	NaN	NaN	NaN	NaN	NaN	NaN	NaN	NaN	NaN	NaN	NaN	NaN	NaN	NaN	NaN	NaN	NaN	NaN	NaN	NaN	NaN	NaN	NaN	NaN	NaN	NaN	NaN	NaN	NaN	NaN	NaN	NaN	NaN	NaN	NaN	NaN	NaN	NaN	NaN	NaN
1	NaN	A0A0G2JZ69;A0A0G2K1Y8;C9EH87;Q63363			1	286.71	90474000	3	NaN	NaN	NaN	NaN	NaN	NaN	NaN	NaN	NaN	NaN	NaN	NaN	NaN	NaN	NaN	NaN	NaN	NaN	NaN	NaN	NaN	NaN	NaN	NaN	NaN	NaN	NaN	NaN	NaN	NaN	NaN	NaN	NaN	NaN	NaN	NaN	NaN	NaN	NaN	NaN	NaN
1	NaN	A0A0G2JZ75;Q9WV78	Plasmalemma vesicle-associated protein	Plvap	2	50.102	11071000	3	NaN	NaN	NaN	NaN	NaN	NaN	NaN	NaN	NaN	NaN	NaN	NaN	NaN	NaN	NaN	NaN	NaN	NaN	NaN	NaN	NaN	NaN	NaN	NaN	NaN	NaN	NaN	NaN	NaN	NaN	NaN	NaN	NaN	NaN	NaN	NaN	NaN	NaN	NaN	NaN	NaN
1	NaN	U6A022;A0A0G2JZ83;A0A0G2K2D4		AGAP3	1	87.125	20183000	6	NaN	NaN	NaN	NaN	NaN	NaN	NaN	NaN	NaN	NaN	NaN	NaN	NaN	NaN	NaN	NaN	NaN	NaN	NaN	NaN	NaN	NaN	NaN	NaN	NaN	NaN	NaN	NaN	NaN	NaN	NaN	NaN	NaN	NaN	NaN	NaN	NaN	NaN	NaN	NaN	NaN
0.086543	0.244937	A0A0G2JZA2;P97576	GrpE protein homolog 1, mitochondrial	Grpel1	8	25.811	1167700000	74	24.3492	24.3443	24.2589	24.1149	23.9222	24.293	23.6959	23.8045	23.884	24.4145	24.3857	24.2664	23.8938	24.0266	24.0731	NaN	NaN	NaN	23.6611	23.8266	23.4701	24.4466	24.3062	24.474	24.2368	23.3217	22.8806	23.5326	23.7872	23.6194	24.2618	24.4024	24.0404	24.4903	23.992	24.3436	24.5046	24.2296	24.2903	23.7561	23.9977
0.184508	0.0824217	A0A0G2JZF0;B5DEG8		Sec24c	25	114.7	7432300000	258	26.6118	26.873	26.5951	26.897	26.8545	26.9342	26.9457	26.6023	26.6707	26.7433	27.0027	26.7282	26.8717	26.8841	26.9632	26.6878	26.87	27.0324	27.0189	26.9639	26.8208	26.7075	26.6655	26.8536	27.0045	26.8162	27.0021	26.6298	26.9653	26.7487	26.808	26.7884	26.602	26.7767	26.663	26.753	26.9579	27.1996	26.9379	26.9766	27.0509
0.552429	-0.0476148	A0A0G2JZG7;Q6P799	Serine--tRNA ligase, cytoplasmic	Sars	16	61.362	2778600000	321	24.9985	25.1261	24.9996	25.5676	25.6904	25.7644	25.3312	25.4045	25.27	25.2429	25.1759	25.1925	25.0476	25.0219	25.151	25.1137	24.7688	24.4984	25.6101	25.4723	25.603	25.3911	25.2815	25.5124	25.384	25.2911	25.4582	25.2831	25.2426	25.054	25.5669	25.3726	25.4431	25.255	25.048	25.0825	25.3879	25.2658	25.3647	25.4266	25.5729
1	NaN	B1WBZ3;A0A0G2JZG8		Cep89	1	72.884	298840000	10	NaN	NaN	NaN	NaN	NaN	NaN	NaN	NaN	NaN	NaN	NaN	NaN	NaN	NaN	NaN	NaN	NaN	NaN	NaN	NaN	NaN	NaN	NaN	NaN	NaN	NaN	NaN	NaN	NaN	NaN	NaN	NaN	NaN	NaN	NaN	NaN	NaN	NaN	NaN	NaN	NaN
0.253028	0.109777	A0A0G2JZH0;D3ZJ77		Cab39	16	39.873	2116800000	228	25.0619	24.7207	24.7168	24.9056	24.9893	25.2402	24.9373	24.9652	24.9446	24.7558	24.8159	24.7973	24.8626	24.8544	25.0779	NaN	NaN	NaN	24.6256	24.6642	24.2431	24.9804	24.8261	24.7801	25.1681	25.1831	25.2111	24.5034	24.2807	24.669	24.3739	24.6082	24.9656	25.013	24.7579	24.8202	24.784	24.7004	24.9692	24.6247	24.8952
1	NaN	A0A0G2JZH3			1	104.13	1471600	1	NaN	NaN	NaN	NaN	NaN	NaN	NaN	NaN	NaN	NaN	NaN	NaN	NaN	NaN	NaN	NaN	NaN	21.2912	NaN	NaN	NaN	NaN	NaN	NaN	NaN	NaN	NaN	NaN	NaN	NaN	NaN	NaN	NaN	NaN	NaN	NaN	NaN	NaN	NaN	NaN	NaN
0.0365019	0.273411	D3ZZ48;A0A0G2JZH4		Slc35a1	4	34.256	1015300000	108	23.7339	23.6423	23.7323	23.5237	23.4879	22.9482	23.9585	24.0379	24.3571	23.4067	23.7145	23.587	24.3514	24.0694	24.0056	NaN	NaN	NaN	23.4626	23.4361	23.756	23.7458	24.0352	24.0355	24.0939	24.1074	23.9648	23.6607	23.5705	23.6638	23.3184	23.3284	23.9738	24.0216	23.6872	23.6227	23.8812	23.9425	24.0734	23.6865	23.7952
0.00767145	0.212255	A0A0G2JZH8;Q5BJX2;Q7TQ85		Pdhx	7	54.169	463900000	109	22.6634	22.8698	22.9632	22.0243	21.6983	NaN	22.8325	22.8406	22.5202	22.7404	22.9624	23.0045	22.8798	23.1398	22.9566	NaN	NaN	NaN	22.3629	22.7694	22.3048	22.6574	22.5849	22.6985	22.724	22.8268	22.9514	21.6428	22.3523	22.4794	22.3981	22.6657	22.6916	NaN	22.8111	22.8613	22.5849	23.1578	22.9225	22.7857	22.2957
0.467241	0.0739199	M0RBF0;A0A0G2JZI0;O88453;A0A0G2JW97	Scaffold attachment factor B1	Safb	10	104.41	836310000	103	23.54	24.1628	23.5813	23.5955	NaN	23.611	NaN	23.6699	23.8579	23.5537	23.7972	23.9374	NaN	23.5659	24.0046	NaN	NaN	NaN	23.7046	23.5735	23.6987	23.4576	23.6261	23.7213	23.9711	24.0223	NaN	23.4979	23.1431	23.2728	23.4471	23.5901	23.3712	23.7343	23.6538	23.5109	23.7223	23.5297	23.3045	23.7347	23.9715
0.772716	-0.00903969	A0A0G2JZI2;Q6TXE9;Q5I0H2		Eprs	51	169.86	13933000000	1122	27.3736	27.3732	27.3106	27.6294	27.7226	27.6438	27.3527	27.4462	27.4093	27.6676	27.4979	27.6214	27.4797	27.4069	27.5032	27.761	27.6796	28.001	27.5197	27.4551	27.4226	27.5582	27.4201	27.4784	27.5034	27.4899	27.5911	27.1862	27.3146	27.1827	27.5601	27.5213	27.5948	27.3682	27.3578	27.3991	27.5576	27.6201	27.6449	27.4187	27.5128
1	NaN	A0A0G2JZJ5;A0A0G2K2U0;Q5PQL5	Phosphatidylserine synthase 1	Ptdss1	1	58.862	36836000	11	NaN	NaN	NaN	NaN	NaN	NaN	NaN	NaN	NaN	NaN	NaN	NaN	NaN	NaN	NaN	NaN	NaN	NaN	NaN	NaN	NaN	NaN	NaN	NaN	NaN	NaN	NaN	NaN	NaN	NaN	NaN	NaN	NaN	NaN	NaN	NaN	NaN	NaN	NaN	NaN	NaN
0.595835	-0.0397194	A0A0G2JZM2;B5DFC3		Sec23a	17	84.712	3333800000	239	25.5833	25.2386	25.6107	25.3159	25.6647	25.5925	25.5773	25.5779	25.5664	25.5096	25.2458	25.5251	25.3268	25.6041	25.267	26.2422	25.7914	26.0396	25.503	25.322	25.0322	25.5482	25.379	25.4576	25.6702	25.7789	25.6024	25.2825	25.8255	25.5238	25.8347	25.7625	NaN	25.4057	25.483	25.2714	25.5659	25.5571	25.4926	25.6714	25.2813
0.00713766	-0.260372	A0A0G2JZS1;Q56R15;Q3KR98;F1LT58;A0A0H2UHW5;Q56R16	Importin subunit alpha	Kpna6	9	59.893	1058500000	96	23.8813	23.7671	23.4579	24.4126	23.9371	24.2713	24.0772	24.0162	23.6424	23.9242	24.0093	24.1081	23.6487	23.8511	23.7412	NaN	NaN	NaN	23.9539	24.1985	23.8057	23.9991	23.9242	23.5822	23.8553	24.1884	NaN	23.9012	24.1406	23.7414	24.0595	24.4786	24.209	23.8811	23.4416	23.9713	23.9834	NaN	NaN	24.2753	23.9623
1	NaN	A0A0G2JZV8;Q80WE1;Q8VD80;Q6GWE1;A0A067XMN7;A0A067XMV1	Fragile X mental retardation protein 1 homolog	Fmr1	5	68.952	287570000	21	NaN	NaN	NaN	NaN	22.3381	22.7194	NaN	NaN	22.191	NaN	NaN	NaN	NaN	NaN	NaN	NaN	NaN	NaN	NaN	NaN	NaN	NaN	NaN	NaN	NaN	NaN	NaN	NaN	NaN	NaN	NaN	NaN	NaN	NaN	NaN	NaN	NaN	NaN	NaN	22.274	22.262
1	NaN	A0A0G2K285;A0A0G2K4S1;A0A0G2K1L4;A0A0G2JZY3			1	50.797	0	10	NaN	NaN	NaN	NaN	NaN	NaN	NaN	NaN	NaN	NaN	NaN	NaN	NaN	NaN	NaN	NaN	NaN	NaN	NaN	NaN	NaN	NaN	NaN	NaN	NaN	NaN	NaN	NaN	NaN	NaN	NaN	NaN	NaN	NaN	NaN	NaN	NaN	NaN	NaN	NaN	NaN
0.0427103	-0.203404	A0A0G2JZZ4			5	16.21	975490000	158	24.3062	23.5982	23.885	23.999	24.0596	24.1499	23.9405	23.745	23.9209	23.4446	23.5062	23.2908	23.6613	23.7064	23.897	NaN	NaN	NaN	24.5348	24.2803	24.2817	23.8952	23.9351	24.0886	23.641	23.4809	23.4933	23.8138	24.2557	23.9463	24.0188	24.0098	24.1574	23.5457	23.535	23.5492	23.7649	23.7729	23.6532	23.7298	23.8298
0.0301458	0.314056	Q5XI38;A0A0G2K014		Lcp1	32	70.121	13677000000	1030	27.6815	27.6976	27.6925	27.7317	27.7043	27.7331	27.539	27.6425	27.5107	27.391	27.4107	27.4286	27.8292	27.834	27.8096	27.2338	26.926	27.0604	27.3542	27.2703	27.238	27.4334	27.4274	27.4664	28.5035	28.4351	28.5505	27.4587	27.393	27.4038	27.2093	27.1375	27.2007	27.5877	27.4785	27.5896	27.3449	27.4665	27.3795	27.3801	27.412
1	NaN	Q5U2W0;A0A0G2K016		Sun1	4	84.788	60028000	2	NaN	NaN	NaN	NaN	NaN	NaN	NaN	NaN	NaN	NaN	NaN	NaN	NaN	NaN	NaN	NaN	NaN	NaN	NaN	NaN	NaN	NaN	NaN	NaN	NaN	NaN	NaN	NaN	NaN	NaN	NaN	NaN	NaN	NaN	NaN	NaN	NaN	NaN	NaN	NaN	NaN
0.00985471	-0.254745	A0A0G2K022;I6L9G5;Q63399		Rcn3	5	38.942	473680000	60	23.4677	23.3821	23.5336	NaN	NaN	NaN	23.2485	23.7404	23.3915	22.6003	22.6386	22.7946	23.3192	23.2985	23.2051	NaN	NaN	NaN	NaN	NaN	NaN	22.6848	NaN	NaN	23.075	23.0835	22.9628	NaN	NaN	NaN	NaN	NaN	NaN	23.093	23.0387	NaN	NaN	23.0172	23.3061	23.3846	NaN
1	NaN	A0A0G2K038;Q5U1X1	Oligoribonuclease, mitochondrial	Rexo2	6	28.721	130550000	42	NaN	NaN	NaN	NaN	NaN	NaN	NaN	NaN	NaN	NaN	NaN	NaN	NaN	NaN	NaN	NaN	NaN	NaN	NaN	NaN	NaN	NaN	NaN	NaN	NaN	NaN	NaN	NaN	NaN	NaN	NaN	NaN	NaN	NaN	NaN	NaN	NaN	NaN	22.1722	NaN	NaN
0.258672	-0.306991	A0A0G2K047;D3ZGU2		Acss3	5	74.674	135530000	21	NaN	21.7329	NaN	NaN	NaN	NaN	NaN	21.8359	NaN	NaN	NaN	NaN	NaN	NaN	21.7381	NaN	NaN	NaN	NaN	NaN	NaN	NaN	NaN	NaN	NaN	NaN	NaN	NaN	NaN	NaN	NaN	NaN	NaN	21.7737	NaN	NaN	NaN	NaN	NaN	NaN	NaN
0.37044	0.137766	F1LUA1;A0A0G2K051		Eea1	18	161.1	670050000	97	22.8724	22.5985	23.304	21.8529	22.042	22.3083	23.0259	23.1498	23.3516	22.8819	23.2921	23.4784	23.1602	23.4117	23.4628	NaN	NaN	NaN	NaN	NaN	22.4869	23.1794	23.093	22.8794	23.6215	23.8336	23.583	22.6979	NaN	22.1739	22.8424	22.6498	22.7306	23.2308	23.3996	23.6321	23.6387	23.1198	23.114	23.0245	22.7235
0.574084	-0.070695	A0A0G2K059;M0RDI5		Mcu	9	36.057	1171400000	126	24.3534	24.0714	23.8832	24.3013	24.7546	23.9774	24.5739	24.4081	24.1204	24.158	24.1346	24.2195	23.9834	23.7545	23.85	NaN	NaN	NaN	24.1419	24.482	NaN	24.3764	24.4538	24.3909	23.558	23.5493	23.8541	24.7945	24.6492	24.859	NaN	NaN	NaN	24.0959	24.4716	24.3178	23.5286	23.9134	24.0147	24.1538	24.3865
0.43717	0.0929396	A0A0G2K064;Q499N7;A0A0G2K163;G3V9T9;P81718;Q8R5H0	Tyrosine-protein phosphatase non-receptor type;Tyrosine-protein phosphatase non-receptor type 6	Ptpn6	12	67.619	1188200000	117	23.9641	23.8831	23.695	24.5986	24.5667	24.173	23.8594	24.0782	23.8967	23.964	24.1424	23.8362	23.9221	23.9322	24.2396	NaN	NaN	NaN	23.7368	24.0354	23.7652	23.8379	23.7714	23.7084	24.7576	24.6449	24.7266	23.7972	23.8334	23.5927	23.7552	23.9982	23.5716	24.0404	24.0512	24.1149	23.8999	24.0206	23.9575	24.258	23.9875
0.0598138	0.153652	Q5XIM5;A0A0G2K0B0;Q6QI67	Protein CDV3 homolog	Cdv3	7	24.31	870680000	224	23.7532	23.5169	23.4723	22.5081	22.5119	23.8448	23.148	23.3052	23.1126	23.6721	23.5729	23.8892	23.6276	23.6936	23.44	NaN	NaN	NaN	NaN	23.2209	23.5558	23.746	23.6535	23.7635	23.4754	23.1528	23.7129	23.4809	22.8577	22.8063	23.4368	23.6349	23.7687	23.6281	23.7436	23.8277	23.4786	23.5762	23.9149	22.8991	22.8937
0.00398767	-0.126338	A0A0G2K0B4;A0A0G2K8P3;Q62940;Q6P778;Q5U1Z5;A0A0G2JUY1	E3 ubiquitin-protein ligase NEDD4	Nedd4	22	102.43	6001000000	619	26.1982	26.3211	26.2005	26.6923	26.6994	26.6721	26.3706	26.3008	26.2621	26.3716	26.3489	26.34	26.2897	26.1546	26.343	26.6245	26.3782	26.2921	26.2129	26.2779	26.252	26.3182	26.1794	26.3167	26.2819	26.217	26.2905	26.5688	26.4671	26.5018	26.3471	26.2403	26.1561	26.2669	26.3782	26.3294	26.1329	26.1652	26.2638	26.4404	26.5764
1	NaN	O70631;G3V9D8;A0A0G2K455;A0A0G2K0C1	Carboxylic ester hydrolase	Ces2c	2	62.189	63886000	12	NaN	NaN	NaN	NaN	NaN	NaN	NaN	NaN	NaN	20.6492	NaN	NaN	NaN	21.4754	NaN	NaN	NaN	NaN	NaN	NaN	NaN	NaN	NaN	NaN	NaN	NaN	NaN	NaN	NaN	NaN	NaN	NaN	NaN	NaN	NaN	NaN	NaN	NaN	NaN	NaN	NaN
0.419645	-0.0592765	A0A0G2K0D3			26	66.215	15942000000	708	27.5264	27.6555	27.7097	28.111	28.0855	28.1806	27.6108	27.5682	27.591	27.7538	27.7007	27.7772	27.6855	27.6747	27.623	27.2058	27.516	26.8049	27.5673	27.6099	27.6514	27.5696	27.4725	27.588	27.727	27.5871	27.7502	27.9595	28.0439	28.1274	27.417	27.4097	27.4023	27.9214	27.893	27.8772	27.529	27.6182	27.6019	27.8328	27.9409
1	NaN	F1M5A4;D4A6T1;A0A0G2K0I1	Katanin p60 ATPase-containing subunit A-like 2	Katnal2;Spata5	1	61.035	1615400000	19	NaN	NaN	NaN	NaN	NaN	NaN	NaN	NaN	NaN	NaN	NaN	NaN	NaN	NaN	NaN	NaN	NaN	NaN	NaN	NaN	NaN	NaN	NaN	NaN	NaN	NaN	NaN	NaN	NaN	NaN	NaN	NaN	NaN	NaN	NaN	NaN	NaN	NaN	NaN	NaN	NaN
0.518052	-0.0490527	A0A0G2K0I3;Q80Z29	Nicotinamide phosphoribosyltransferase	Nampt	8	54.091	1314300000	170	24.2748	23.9566	23.9544	24.4123	24.2762	24.3115	24.3566	23.8731	24.2623	24.0552	23.8237	23.8605	24.1419	24.2179	24.3309	NaN	NaN	NaN	24.5623	24.5068	24.4849	24.1041	24.0704	24.2975	24.5906	23.9937	24.3225	24.1434	24.0244	24.2356	24.4264	24.4219	24.3432	23.9356	23.6759	24.2782	24.3487	24.6273	24.4564	24.3601	24.3885
1	NaN	A0A0G2K0J0;F1LR36;Q4G018;B5DFK4		Supt6h	7	198.94	84054000	26	NaN	NaN	NaN	NaN	NaN	NaN	NaN	NaN	NaN	NaN	NaN	NaN	NaN	NaN	NaN	NaN	NaN	23.1875	NaN	NaN	NaN	NaN	NaN	NaN	NaN	NaN	NaN	NaN	NaN	NaN	NaN	NaN	NaN	NaN	NaN	NaN	NaN	NaN	NaN	NaN	NaN
1	NaN	A0A0G2K0J7			4	113.33	138210000	3	NaN	NaN	NaN	NaN	NaN	NaN	NaN	NaN	NaN	NaN	NaN	NaN	NaN	NaN	NaN	NaN	NaN	NaN	NaN	NaN	NaN	NaN	NaN	NaN	NaN	NaN	NaN	NaN	NaN	NaN	NaN	NaN	NaN	NaN	NaN	NaN	NaN	NaN	NaN	NaN	NaN
0.11272	-0.105464	A0A0G2K0L0;B2RYI8;F1LX70;A0A0G2KB21		Papss1	11	70.562	1881300000	207	24.4817	24.3762	24.5933	25.0474	24.9829	24.6902	24.5615	24.6557	24.6368	24.7552	24.9088	24.9839	24.7437	24.6181	24.6745	25.4341	25.0733	25.1366	24.7657	25.0225	24.8673	24.4415	24.5888	24.4976	24.773	24.8956	24.79	24.4862	24.5156	24.6101	24.8062	24.9648	24.9362	24.4201	24.2435	24.3584	24.5088	24.5805	24.5681	24.9453	24.9041
1	NaN	A0A0G2K0N6			1	10.753	8082200	3	NaN	NaN	NaN	NaN	NaN	NaN	NaN	NaN	NaN	NaN	NaN	NaN	NaN	NaN	NaN	NaN	NaN	NaN	NaN	NaN	NaN	NaN	NaN	NaN	NaN	NaN	NaN	NaN	NaN	NaN	NaN	NaN	NaN	NaN	NaN	NaN	NaN	NaN	NaN	NaN	NaN
0.571627	0.0973682	A0A0G2K0P8;A0A0G2K7R8;Q8VII6	Choline transporter-like protein 1	Slc44a1	9	73.092	771910000	129	23.0505	23.1957	23.0876	23.8839	24.0305	24.0013	23.7502	23.685	23.527	24.0068	24.3477	24.2304	23.9323	23.981	24.0981	24.2731	24.0495	23.9875	22.9871	23.4844	22.9691	23.7788	23.6783	23.9391	23.6041	23.4685	23.6836	23.3707	23.5874	23.6586	23.258	23.0808	22.8658	23.7507	23.6423	23.548	23.3202	22.9627	23.4728	23.1513	23.0829
0.247196	-0.0700587	A0A0G2K0Q7;D3ZFU9		Mylk	83	214	104080000000	4020	30.336	30.3837	30.3514	30.5332	30.5517	30.6364	30.4486	30.4559	30.4554	30.3231	30.3433	30.3055	30.5097	30.4656	30.5051	29.928	29.9776	29.8472	30.3723	30.373	30.408	30.2472	30.212	30.2019	30.4806	30.5011	30.5356	30.6058	30.6564	30.6409	30.2546	30.2624	30.286	30.6043	30.6512	30.5948	30.454	30.4572	30.4273	30.5332	30.5811
1	NaN	A0A0G2K0T5;F1LNV5;Q6P6Q9	Calcium uptake protein 1, mitochondrial	Micu1	3	54.817	371660000	67	NaN	NaN	NaN	NaN	NaN	NaN	NaN	NaN	NaN	NaN	NaN	NaN	NaN	NaN	NaN	NaN	NaN	NaN	NaN	NaN	NaN	NaN	NaN	NaN	NaN	NaN	NaN	NaN	NaN	NaN	NaN	NaN	NaN	NaN	NaN	NaN	NaN	NaN	NaN	NaN	NaN
0.421813	0.15704	A0A0G2K0T6;F1LQ96;Q63544	Gamma-synuclein	Sncg	7	13.045	1195800000	143	24.7011	24.1932	24.4321	22.9789	22.8325	22.5063	24.1585	24.4349	23.9263	22.9164	23.0937	23.1598	23.9101	23.6731	23.9271	NaN	NaN	NaN	23.0102	NaN	NaN	24.5973	24.5115	24.4722	23.6834	23.3327	24.2022	23.9593	24.3471	24.2582	23.7286	23.6366	23.4681	24.016	24.1766	24.2276	23.7349	23.5379	NaN	24.2676	24.0943
0.724996	0.0285105	A0A0G2K0V8;Q63525	Nuclear migration protein nudC	Nudc	13	32.4	2511100000	181	25.1049	25.3952	25.619	24.825	25.1342	24.2456	25.0536	25.0919	24.8004	25.0814	25.3799	25.3766	25.0011	24.9642	25.0481	24.4833	24.3747	24.6087	24.8677	24.8247	24.6478	25.1454	25.2601	25.2048	25.1273	25.096	25.0057	24.5189	25.0961	24.8345	24.9264	25.0816	25.0182	25.2228	25.201	25.0285	25.0654	24.9639	25.0459	25.1542	25.0755
0.241434	-0.0748478	A0A0G2K0W9;P48004;A0JPK2;F1M6I7	Proteasome subunit alpha type-7;Proteasome subunit alpha type	Psma7	15	27.855	9564600000	486	26.8526	26.9178	27.0096	27.2195	27.0731	27.3301	27.1491	27.1318	27.012	27.0811	27.1475	27.0893	26.9734	27.0593	26.9468	26.2645	25.6591	25.9136	27.3023	27.4564	27.2897	26.9016	26.9694	26.9919	27.288	27.2947	27.2142	26.9655	26.9684	26.9997	27.1751	27.1984	27.0948	26.9832	26.9064	26.9121	27.0661	27.0737	27.1051	27.112	26.9751
1	NaN	A0A0G2K0X5;Q6MG55;A0A096MJX3;A0A0G2K2Q0;A0A096MJC0;A0A096MKA7;A0A0G2K4N8	Abhydrolase domain-containing protein 16A	Abhd16a	2	62.896	29564000	2	NaN	NaN	NaN	NaN	NaN	NaN	NaN	NaN	NaN	NaN	NaN	NaN	NaN	NaN	NaN	NaN	NaN	NaN	NaN	NaN	NaN	NaN	21.5699	NaN	NaN	NaN	NaN	NaN	NaN	NaN	NaN	NaN	NaN	NaN	NaN	NaN	NaN	NaN	NaN	NaN	NaN
0.328624	-0.0586123	A0A0G2K0X9;G3V699;Q9Z2Q1	Protein transport protein Sec31A	Sec31a	33	131.97	9722700000	753	27.0776	27.0092	26.9533	27.3536	27.3074	27.352	26.8884	26.9869	26.9418	26.9636	27.0353	27.1144	27.0107	27.0618	27.0341	26.819	26.6382	25.6459	27.3604	27.3936	27.2395	27.1594	27.0057	27.1242	27.1224	26.9473	27.0623	26.8277	26.7442	26.8565	27.269	27.1452	27.2741	26.9411	26.9361	27.0099	27.1822	27.1776	27.2266	26.9165	26.9972
1	NaN	A0A0G2K0Y2			1	63.593	121830000	0	NaN	NaN	NaN	NaN	NaN	NaN	NaN	NaN	NaN	NaN	NaN	NaN	NaN	NaN	NaN	NaN	NaN	NaN	NaN	NaN	NaN	NaN	NaN	NaN	NaN	NaN	NaN	NaN	NaN	NaN	NaN	NaN	NaN	NaN	NaN	NaN	NaN	NaN	NaN	NaN	NaN
1	NaN	Q2EJA0;A0A0G2K0Y6;R9PXS9	Transcriptional coactivator YAP1	Yap1	2	50.501	144090000	34	NaN	NaN	NaN	NaN	NaN	NaN	NaN	NaN	NaN	NaN	NaN	NaN	NaN	NaN	NaN	NaN	NaN	NaN	NaN	NaN	NaN	21.889	22.19	NaN	NaN	NaN	NaN	NaN	NaN	NaN	NaN	NaN	NaN	22.765	NaN	NaN	NaN	NaN	NaN	NaN	NaN
0.893653	0.00852115	A0A0G2K0Z7;P35571;A0A0G2K1F9;F1LNI0;Q6LCP5	Glycerol-3-phosphate dehydrogenase, mitochondrial;Glycerol-3-phosphate dehydrogenase	Gpd2	11	69.061	656310000	33	23.513	23.217	23.26	23.8966	23.6804	NaN	23.3728	23.511	23.4619	22.9414	22.9535	23.5002	23.0512	23.397	NaN	NaN	NaN	23.6306	23.1581	23.2233	23.2154	23.6201	24.3823	24.111	NaN	23.3635	NaN	23.7256	24.383	23.7295	23.2504	23.105	23.1886	23.0339	23.4154	NaN	22.9751	23.3153	NaN	23.9287	23.9688
1	NaN	G3V7L9;A0A0G2K101;Q9ESV1	Leucine zipper protein 1	Luzp1	6	119.81	186900000	52	NaN	22.2485	NaN	NaN	NaN	NaN	NaN	NaN	NaN	22.3305	NaN	NaN	21.8318	NaN	22.1006	NaN	NaN	NaN	NaN	NaN	NaN	22.2441	NaN	NaN	NaN	NaN	NaN	NaN	NaN	NaN	NaN	NaN	NaN	NaN	NaN	NaN	NaN	NaN	NaN	NaN	NaN
1	NaN	A0A0G2K103;Q3B7D2		Sptlc2	1	58.486	9151100	8	NaN	NaN	NaN	NaN	NaN	NaN	NaN	NaN	NaN	NaN	NaN	NaN	NaN	NaN	NaN	NaN	NaN	NaN	NaN	NaN	NaN	NaN	NaN	NaN	NaN	NaN	NaN	NaN	NaN	NaN	NaN	NaN	NaN	NaN	NaN	NaN	NaN	NaN	NaN	NaN	NaN
0.186966	-0.10788	A0A0G2K110;Q3KRD8	Eukaryotic translation initiation factor 6	Eif6	6	26.727	3449000000	236	25.4211	25.2994	25.5045	25.7969	25.7204	25.8503	25.6357	25.4373	25.7584	25.6248	25.4941	25.6405	25.5449	25.4195	25.459	24.7518	25.2863	25.4071	26.0554	26.2402	25.8702	25.5107	25.4471	25.5333	25.7376	25.7188	25.6443	25.4898	25.5401	25.3026	25.9168	25.642	25.6297	25.4079	25.2671	25.4653	25.6519	25.5414	25.6845	25.8086	25.7205
0.00445526	-0.249313	A0A0G2K121;Q5FVQ4	Malectin	Mlec	11	32.809	1008800000	172	23.7359	23.9308	23.9725	24.396	24.5305	24.319	24.1379	24.1858	24.1668	22.9566	23.0441	22.8742	23.5776	23.4648	23.3899	NaN	NaN	NaN	24.1083	24.218	24.1352	24.4474	24.1468	24.3469	23.2352	23.4579	23.6745	24.3877	24.3301	24.4228	23.6843	23.5216	23.6104	24.4764	23.83	24.0367	23.7031	23.635	23.7667	24.1695	23.8443
0.500318	-0.127783	A0A0G2K135;Q9WUW3	Complement factor I;Complement factor I heavy chain;Complement factor I light chain	Cfi	5	69.774	287790000	77	22.293	NaN	NaN	NaN	NaN	NaN	22.357	22.5927	22.5603	22.2044	22.1695	NaN	21.7768	21.7544	NaN	NaN	NaN	NaN	NaN	NaN	22.0655	21.6742	22.1427	NaN	22.7798	22.43	NaN	22.2267	NaN	22.4243	22.3539	22.3649	22.149	NaN	21.9432	22.017	22.7912	22.9724	23.0489	NaN	21.7712
0.0358167	0.372707	A0A0G2KAK2;D3ZKF7;D4A9A6;D3ZIP3;A0A0G2K161;D4A6Q4		Epb4.1	3	72.372	85869000	74	21.2209	NaN	21.0707	NaN	NaN	NaN	20.6486	NaN	NaN	NaN	NaN	NaN	NaN	NaN	21.3338	NaN	NaN	NaN	NaN	NaN	NaN	NaN	NaN	NaN	21.227	21.2818	NaN	NaN	NaN	NaN	NaN	NaN	NaN	NaN	NaN	NaN	NaN	NaN	NaN	NaN	NaN
0.0823174	0.151362	A0A0G2K174;Q6JBI6;A0A0G2K8R3;Q6JBI7;Q6J0M8		Lmo7	27	156.76	2857000000	494	24.9733	25.0474	25.0947	25.3276	25.1936	25.3334	25.0015	24.8767	24.9935	25.314	25.3458	25.312	25.2831	25.3948	25.3206	25.7538	25.7845	25.8958	25.2391	25.3573	25.3681	25.4815	25.3628	25.3706	25.5391	25.3249	25.3934	25.1272	25.0952	25.1815	25.1994	25.1538	25.4384	25.1842	25.0908	25.1456	24.9073	25.1032	25.2167	25.4258	25.2431
0.138822	0.37435	M0RBI3;D4A5Y6;B5DFB7;A0A0G2K1A0		LOC102553099;Naa50	4	19.317	374100000	56	NaN	22.436	22.07	NaN	NaN	NaN	NaN	NaN	NaN	22.909	22.8404	22.7929	22.3251	22.9709	22.4947	NaN	NaN	NaN	21.7285	NaN	NaN	NaN	NaN	NaN	NaN	NaN	22.5454	NaN	NaN	NaN	NaN	NaN	NaN	22.4888	NaN	NaN	NaN	NaN	NaN	22.5969	22.1929
0.00706501	-0.108649	Q4V7C7;A0A0G2K1C0;Q9ERF9	Actin-related protein 3	Actr3	28	47.357	24627000000	1310	28.2747	28.283	28.2563	28.7069	28.7113	28.7201	28.367	28.3812	28.4247	28.4093	28.4788	28.3976	28.3985	28.4596	28.379	28.5806	28.8045	28.478	28.676	28.6368	28.6722	28.2789	28.3475	28.3484	28.4647	28.4121	28.4986	28.3982	28.3541	28.3452	28.49	28.4124	28.4305	28.3167	28.3457	28.3968	28.4194	28.4056	28.5105	28.3642	28.4198
0.609861	0.058329	F1M7Y3;A0A0G2K1D2		Rap1gds1	12	52.248	13800000000	110	27.5237	27.6944	27.6455	28.3397	27.9637	27.6712	27.9348	27.5683	27.583	27.682	27.6342	27.8223	27.4885	27.6183	27.8322	NaN	27.5323	NaN	27.5492	27.3559	27.1465	27.4045	27.4415	27.3648	28.4062	28.1667	27.9658	27.4428	27.5549	27.8085	27.189	27.3331	27.7449	27.773	27.3857	27.6415	27.6649	27.6781	27.4582	27.4151	27.5899
0.240889	0.464996	A0A0G2K1E5;F1LSH0;Q561R4		Sympk	4	141.91	2682900000	34	NaN	NaN	NaN	NaN	NaN	NaN	NaN	NaN	NaN	25.1691	NaN	NaN	26.2286	NaN	NaN	NaN	NaN	NaN	NaN	NaN	NaN	NaN	NaN	NaN	25.3404	26.3358	26.7474	NaN	NaN	26.0392	NaN	NaN	NaN	NaN	NaN	NaN	NaN	NaN	26.8104	26.3277	26.0965
0.77464	0.023304	B1WC16;Q7TP73;A0A0G2K2S3;A0A0G2K1G0		Bclaf1	4	106.06	144890000	49	NaN	21.3523	NaN	NaN	NaN	NaN	NaN	NaN	NaN	NaN	21.5674	21.5181	NaN	21.3764	21.4953	NaN	NaN	NaN	NaN	NaN	NaN	NaN	NaN	NaN	NaN	21.2674	NaN	NaN	NaN	NaN	NaN	NaN	NaN	21.3606	NaN	21.3347	21.5473	NaN	NaN	NaN	NaN
1	NaN	D3ZHI8;A0A0G2K1K5		Trappc11	2	128.37	79080000	3	NaN	NaN	NaN	NaN	NaN	NaN	NaN	NaN	NaN	NaN	NaN	NaN	NaN	NaN	NaN	NaN	NaN	NaN	NaN	NaN	NaN	NaN	NaN	NaN	NaN	NaN	NaN	NaN	NaN	NaN	NaN	NaN	NaN	NaN	NaN	NaN	NaN	NaN	NaN	NaN	NaN
0.824934	-0.0215158	A0A0G2K1L0;Q62657;Q62660;Q62659			62	221.74	11411000000	1272	26.9398	27.0589	26.9793	27.834	27.7723	27.8747	27.083	27.1246	27.097	27.1591	27.2474	27.2628	27.3577	27.4199	27.3886	27.3075	27.0995	27.1298	27.0479	26.9067	27.0155	27.1223	26.9453	26.9693	27.3084	27.4608	27.4447	27.1749	27.2437	27.2732	26.9759	26.9115	27.0819	27.3347	27.2252	27.2554	27.1885	27.1469	27.0959	27.2427	27.1569
1	NaN	A0A0G2K1L8			1	21.719	101240000	53	NaN	NaN	NaN	NaN	NaN	NaN	NaN	NaN	NaN	NaN	NaN	NaN	NaN	NaN	NaN	NaN	NaN	NaN	NaN	NaN	NaN	NaN	NaN	NaN	NaN	NaN	NaN	NaN	NaN	NaN	NaN	NaN	NaN	NaN	NaN	NaN	NaN	NaN	NaN	NaN	NaN
0.842733	-0.0162482	F1LNM0;A0A0G2K1M2;Q62696;F1M907;Q63622	Disks large homolog 1	Dlg1	13	100.61	996960000	65	23.7718	23.8912	23.77	23.8551	23.8024	24.1276	24.126	23.9973	23.9995	23.7829	23.5094	23.8721	24.0556	23.9568	23.8601	NaN	NaN	NaN	23.8412	23.9254	24.1748	23.787	23.7918	23.6599	24.0679	24.075	23.8105	23.4788	23.4315	23.5099	23.8296	23.9404	23.97	23.7665	23.8325	23.5912	23.7167	23.968	23.8747	23.762	23.5442
0.0697178	-0.134854	A0A0G2K1M8;O70196	Prolyl endopeptidase	Prep	16	80.491	3473300000	264	25.5426	25.5221	25.6079	26.12	25.9579	26.1133	25.6385	25.6452	25.766	25.4201	25.2788	25.1855	25.4324	25.538	25.5326	NaN	26.405	NaN	25.9094	25.7387	25.8567	25.4561	25.5	25.3872	25.8798	25.8278	25.6215	25.5575	25.5038	25.7907	25.6431	25.2895	25.6328	25.3684	25.3822	25.3969	25.4943	25.6025	25.3374	25.5995	25.7632
1	NaN	A0A0G2K1N9;B2GVA1		Selo	4	74.234	160390000	12	NaN	NaN	NaN	NaN	NaN	NaN	NaN	NaN	NaN	NaN	NaN	NaN	NaN	NaN	NaN	NaN	NaN	NaN	NaN	NaN	NaN	NaN	NaN	NaN	NaN	NaN	NaN	NaN	NaN	NaN	NaN	NaN	NaN	NaN	21.4525	NaN	NaN	NaN	NaN	NaN	NaN
0.0885982	-0.239038	A2TIS8;A2TIS7;A0A0G2K6B2;B5DFF5;A0A0G2K1P8;Q5M7V4		Triobp	5	61.771	190180000	76	NaN	21.9672	21.8673	21.4561	NaN	NaN	22.101	21.7577	21.4477	21.4191	NaN	NaN	21.3607	21.4675	NaN	NaN	NaN	NaN	NaN	NaN	NaN	21.6604	NaN	NaN	22.1389	NaN	NaN	NaN	21.8016	21.8634	NaN	NaN	21.8076	21.7129	21.754	21.7425	21.9117	21.7037	NaN	21.8684	21.7658
0.116948	-0.175169	A0A0G2K1S6;F1LQQ1	Malic enzyme	Me1	17	63.832	3244700000	224	25.0254	25.3439	24.966	25.698	25.5678	25.6777	25.2296	25.5574	25.4842	25.0961	25.2757	25.2381	24.9729	24.9228	24.6276	25.1387	26.8693	NaN	25.5686	25.6055	25.7594	25.1171	25.1994	24.9979	25.5136	25.4486	25.437	25.8119	25.723	25.7904	25.4855	25.3966	25.7426	25.2698	25.4001	25.4123	25.3036	25.3858	25.3898	25.8942	25.7539
0.470569	-0.0711951	A0A0G2K1U9;M0R686		Irgq	2	59.103	145910000	10	NaN	NaN	21.7309	NaN	NaN	22.0739	NaN	NaN	NaN	22.1719	NaN	21.8979	NaN	22.0367	NaN	22.2083	NaN	22.4312	NaN	22.1748	NaN	22.0995	22.0025	NaN	NaN	NaN	21.9883	NaN	21.8216	21.871	21.9106	21.9432	21.9139	NaN	NaN	NaN	NaN	21.9019	NaN	NaN	21.9492
1	NaN	D3ZFW1;A0A0G2K1V3		Tsen15	1	14.007	30538000	2	NaN	NaN	NaN	NaN	NaN	NaN	NaN	NaN	NaN	NaN	NaN	NaN	NaN	NaN	NaN	NaN	NaN	NaN	NaN	NaN	NaN	NaN	NaN	NaN	NaN	NaN	NaN	NaN	NaN	NaN	NaN	NaN	NaN	NaN	NaN	NaN	NaN	NaN	NaN	NaN	NaN
0.176976	0.106096	A0A0G2K1W9;Q7TPJ4		Ldhd	12	51.842	1509200000	170	24.3549	24.3741	24.2434	24.1961	24.1267	24.0755	24.3359	24.5571	24.489	24.4955	24.3852	24.2966	24.3388	24.5199	24.5629	24.3165	NaN	24.2334	24.538	24.7152	24.2508	24.5917	24.5455	24.5584	24.6217	24.6682	24.6775	24.0689	24.2273	24.1996	24.152	24.6004	24.3966	24.1555	24.5727	24.6603	24.4712	24.3889	24.3703	24.2626	25.1979
0.138983	0.101662	D3ZP98;A0A0G2K1Z9		Hm13	2	40.275	203390000	51	21.7909	21.9125	NaN	NaN	NaN	NaN	21.7985	21.882	21.9101	NaN	21.3486	21.3343	21.8637	NaN	NaN	NaN	NaN	NaN	21.704	NaN	21.669	21.9878	21.9815	22.031	NaN	NaN	21.7894	NaN	NaN	21.838	NaN	NaN	NaN	21.7731	21.8151	NaN	21.7277	NaN	NaN	NaN	NaN
1	NaN	A0A0G2K249;Q5RKH1	Serine/threonine-protein kinase PRP4 homolog	Prpf4b	5	103.21	69446000	23	NaN	NaN	NaN	NaN	NaN	NaN	NaN	NaN	NaN	NaN	NaN	NaN	NaN	NaN	NaN	22.724	22.8831	23.2286	NaN	NaN	NaN	NaN	NaN	NaN	NaN	NaN	NaN	NaN	NaN	NaN	NaN	NaN	NaN	NaN	NaN	NaN	NaN	NaN	NaN	NaN	NaN
0.291977	-0.0630876	A0A0G2K261;A0A0G2K150;D4A8P9			23	112.68	4192400000	244	25.5944	25.6893	25.4495	25.947	25.8649	26.0947	25.8022	25.946	25.8759	25.5867	25.8962	25.9059	25.5653	25.7393	25.6263	26.2398	26.3954	27.3116	25.7111	26.0524	26.024	25.4904	25.4566	25.64	25.5096	25.9972	25.7077	25.6171	25.8359	25.8602	25.518	25.542	25.5905	25.7381	25.6318	25.71	25.5626	25.7826	25.9187	25.7573	25.8386
1	NaN	A0A0G2K277;Q5M884		Eci3	2	42.324	181050000	5	NaN	NaN	NaN	NaN	NaN	NaN	NaN	NaN	NaN	NaN	NaN	NaN	NaN	NaN	NaN	NaN	NaN	NaN	NaN	NaN	NaN	NaN	NaN	NaN	NaN	NaN	NaN	NaN	NaN	NaN	NaN	NaN	NaN	NaN	NaN	NaN	NaN	NaN	NaN	NaN	NaN
0.141411	-0.0918078	A0A0G2K278;P83645	Glutathione peroxidase 2	Gpx2	13	21.824	2413900000	335	24.8601	24.9111	24.891	25.2744	25.5326	25.2634	24.9364	24.7809	24.8305	25.1534	24.9798	25.1502	24.8923	24.8233	24.8335	26.0182	26.2292	26.1598	25.1339	24.725	24.8855	25.2622	25.1077	25.2074	25.1794	25.0609	25.0564	24.8543	25.1125	25.0722	25.0483	24.888	24.7482	24.5221	25.0115	24.7067	24.9159	24.881	24.8518	25.3884	25.2599
1	NaN	A0A0G2K3A6;A0A0G2K290			1	12.233	388140000	61	NaN	NaN	NaN	NaN	NaN	NaN	NaN	NaN	NaN	NaN	NaN	NaN	NaN	NaN	NaN	NaN	NaN	NaN	NaN	NaN	NaN	NaN	NaN	NaN	NaN	NaN	NaN	NaN	NaN	NaN	NaN	NaN	NaN	NaN	NaN	NaN	NaN	NaN	NaN	NaN	NaN
0.155819	-0.13307	Q5HZY3;A0A0G2K2A5	Ubiquitin carboxyl-terminal hydrolase	Uchl5	6	37.097	318010000	74	22.1058	21.9292	22.1484	NaN	NaN	NaN	22.6335	22.5661	22.3626	22.3492	22.3223	22.3559	22.1454	22.7036	22.2859	NaN	NaN	NaN	22.662	NaN	NaN	22.3948	21.7948	22.0982	NaN	22.0971	22.2174	NaN	NaN	NaN	NaN	22.1821	NaN	22.4263	22.0838	22.1985	NaN	22.1648	22.6632	NaN	22.4858
0.90072	0.00521126	A0A0G2K2B3;M0R961;Q99PF5	Far upstream element-binding protein 2	Khsrp	26	76.748	7405000000	845	26.5767	26.467	26.5628	26.7148	26.5732	26.6105	26.5181	26.5293	26.5017	26.6782	26.714	26.7724	26.5466	26.6513	26.628	27.3774	27.4612	27.5609	26.8872	26.7965	26.814	26.6796	26.6527	26.6476	26.6389	26.6182	26.6374	26.5188	26.4814	26.5622	26.6119	26.7174	26.6288	26.6492	26.5697	26.5625	26.669	26.7265	26.793	26.5901	26.5839
0.0477319	0.141683	A0A0G2K2B9;A0A0G2K4D0;A0A0G2K1R9;A0A0G2K0J3;O70511;A0A0G2K1Q7;Q3T1J5;Q574E1;A0A0G2JUJ5;O88521;Q792M9;O70510	Ankyrin-3	Ank3;ank3	17	202.06	1717600000	159	24.5842	24.4874	24.4351	24.7471	24.15	23.7464	24.6541	24.7038	24.4603	24.9007	24.5999	24.7912	24.8222	24.6538	24.6919	NaN	NaN	NaN	24.2146	24.2704	24.2045	24.4916	24.6185	24.6323	24.8255	24.7071	24.9896	24.3995	24.2431	24.392	24.6098	24.7153	24.4409	24.4434	24.2581	24.1831	24.5228	24.5882	24.1762	24.911	24.6715
0.748808	0.02102	A0A0G2K2C7;D3ZC84;A0A1B0GWT2	Ubiquitin carboxyl-terminal hydrolase	Usp9x	30	290.22	1782500000	317	24.4833	24.8067	24.377	24.5016	24.4904	24.5752	24.4686	24.5082	24.3722	24.4935	24.4648	24.4852	24.6375	24.7672	24.598	24.8781	25.0683	24.8322	24.5882	24.7678	24.5551	24.5194	24.7119	24.4641	24.9878	24.7334	24.7262	24.2093	24.1885	24.1572	24.723	24.8094	24.996	24.4	24.6353	24.3365	24.6879	24.6662	24.5173	24.5328	24.5927
0.00266973	-0.314454	D3ZQL7;A0A0G2K2D6		Tppp	8	23.546	1691300000	94	24.3333	24.1408	24.4404	25.0392	24.8408	24.7443	24.6144	24.6196	24.5786	24.444	24.6976	24.2406	24.2534	24.3015	24.0746	NaN	NaN	NaN	24.8249	25.0815	25.087	24.1592	24.3368	24.2204	24.5819	24.5685	24.7409	25.1905	24.8929	24.6441	24.8387	24.8881	NaN	24.1609	24.2381	24.0607	24.1661	24.2292	24.4882	25.0117	24.9676
1	NaN	F1LSM8;A0A0G2K2I6;Q2PS60;Q63603		Dock9	4	234.8	40751000	20	NaN	NaN	NaN	NaN	NaN	NaN	NaN	NaN	NaN	NaN	NaN	NaN	21.6102	NaN	NaN	NaN	NaN	NaN	NaN	NaN	NaN	NaN	NaN	NaN	NaN	NaN	NaN	NaN	NaN	NaN	NaN	NaN	NaN	NaN	NaN	NaN	NaN	NaN	NaN	NaN	NaN
0.046955	-0.201413	A0A0G2K2L8;Q62915;A0A0G2JVI6;O35807;A0A0G2K8F4;D4A8M2	Peripheral plasma membrane protein CASK	Cask	8	103.21	355830000	24	22.6091	NaN	22.7224	NaN	NaN	NaN	22.7999	22.9396	23.0379	NaN	NaN	NaN	22.7143	22.9179	22.6008	NaN	NaN	NaN	NaN	NaN	NaN	NaN	22.7064	NaN	NaN	NaN	NaN	NaN	NaN	NaN	NaN	NaN	NaN	NaN	NaN	NaN	NaN	22.7817	NaN	NaN	NaN
1	NaN	A0A0G2K2M8;D3ZM62;D3ZQG6	Tripartite motif-containing protein 2	Trim2	3	71.821	53334000	8	NaN	NaN	NaN	NaN	NaN	NaN	NaN	NaN	NaN	NaN	NaN	NaN	NaN	NaN	NaN	NaN	NaN	NaN	NaN	NaN	NaN	NaN	NaN	NaN	21.2989	NaN	NaN	NaN	NaN	NaN	NaN	NaN	NaN	NaN	NaN	NaN	NaN	NaN	NaN	NaN	NaN
0.198125	-0.114132	A0A0G2K2M9;B2GUY6		Srrm2	12	295.11	1000600000	191	23.3749	23.7024	23.71	23.7115	23.5099	23.8527	23.4866	23.5138	23.6806	23.9958	23.8022	23.9892	23.7308	23.7424	23.7517	24.4118	NaN	24.4178	24.1604	23.8095	23.9952	23.9487	24.0585	24.0395	24.0201	23.7549	23.6584	23.6479	23.3577	23.9494	24.0085	23.8233	24.041	23.746	24.096	23.7292	24.1161	23.7726	23.6382	23.9806	23.364
0.0778223	-0.276878	D4A9G3;A0A0G2K2P3		Tnfaip8	3	19.419	596290000	65	22.8294	22.4139	22.6118	23.3941	23.7999	23.7699	23.0999	22.8942	23.3218	23.6678	23.7658	23.3965	22.8008	23.3506	22.8622	NaN	NaN	NaN	NaN	NaN	22.5965	22.6692	22.474	22.6575	23.6563	23.8014	23.3083	23.1791	23.3281	23.4211	23.1084	23.4133	23.0219	23.0129	23.4212	22.8114	NaN	22.6756	22.6773	23.3269	23.6281
0.203482	-0.110879	F1M4A0;A0A0G2K2P5		Tjp1	12	194.03	841200000	132	23.1793	23.5962	23.1141	NaN	23.7799	23.7715	23.5277	23.4061	23.266	23.5746	23.443	23.6987	23.5361	23.448	23.6191	NaN	NaN	NaN	24.0568	23.7228	23.5367	23.2825	23.5339	23.687	23.4616	23.865	23.5019	23.2541	23.5993	23.2168	23.6247	23.5617	23.3499	23.667	23.3697	23.399	23.2738	23.6906	23.5007	23.7904	23.4968
1	NaN	A0A0G2K2P6;Q6AXM7	HBS1-like protein	Hbs1l	3	74.799	26725000	4	NaN	NaN	NaN	NaN	NaN	NaN	NaN	NaN	NaN	NaN	NaN	NaN	NaN	NaN	NaN	NaN	NaN	NaN	NaN	NaN	NaN	NaN	NaN	NaN	NaN	NaN	NaN	NaN	NaN	NaN	NaN	NaN	NaN	NaN	NaN	NaN	NaN	NaN	NaN	NaN	NaN
0.0222239	-0.36338	A0A0G2KAI7;Q5XI84;A0A0G2K2R5		Efemp2	4	37.533	839890000	93	22.9936	22.9772	22.9416	23.8153	23.9369	23.9425	23.6448	23.8434	23.5896	24.0171	24.1352	24.1324	23.809	23.6532	23.9853	NaN	NaN	NaN	23.5017	NaN	NaN	NaN	NaN	NaN	NaN	NaN	23.897	23.0022	23.0209	22.9049	NaN	NaN	NaN	NaN	NaN	23.328	23.6415	23.6326	23.7673	24.1065	23.7682
0.358331	-0.213012	A0A0G2K2S2;P11167	Solute carrier family 2, facilitated glucose transporter member 1	Slc2a1	2	53.88	82296000	47	21.4695	21.9018	NaN	NaN	NaN	NaN	22.4376	22.0144	NaN	NaN	NaN	NaN	NaN	NaN	NaN	NaN	NaN	NaN	NaN	NaN	NaN	21.4766	NaN	21.7728	22.2082	NaN	NaN	NaN	NaN	NaN	NaN	21.7511	NaN	NaN	NaN	NaN	NaN	NaN	NaN	NaN	NaN
0.818773	-0.0244418	A0A0G2K2T6;F1LRU1;A0A0G2K4U6;Q9JIL3	Interleukin enhancer-binding factor 3	Ilf3	9	95.858	875230000	114	23.187	23.4879	23.2335	23.7934	23.9788	23.9689	23.7153	23.4336	23.4487	23.5541	23.44	23.3822	23.8018	23.6409	23.7333	24.3464	24.1742	24.5231	23.2507	23.7307	23.1703	23.3322	23.2106	23.309	23.9531	23.6648	24.0063	23.5385	23.5066	23.5617	23.3681	23.9509	23.9364	23.3661	23.4108	23.5148	23.4273	23.6392	23.5931	23.5176	23.5128
0.137048	-0.108702	A0A0G2K2V2;G3V9N8;P52303	AP complex subunit beta;AP-1 complex subunit beta-1	Ap1b1	21	103.82	6728400000	479	26.2847	26.4595	26.2498	26.4508	26.6713	26.5658	26.4207	26.2883	26.4212	26.3786	26.4418	26.4256	26.2762	26.5876	26.4504	27.3872	26.6982	26.8317	26.6399	26.8035	26.6356	26.256	26.5099	26.3857	26.5858	26.4703	26.6814	26.2063	26.3341	26.3217	26.8346	26.9348	26.7609	26.4551	26.4948	26.4536	26.52	26.4659	26.4639	26.4785	26.4341
0.0233226	-0.156701	Q6AXQ3;A0A0G2K2V7;Q99PW1;F1LM93;A0A0G2K2E3;A0A096MKC1;Q62844;P97540;Q4FZR6;A0A0H2UHH7;Q01621	Non-specific protein-tyrosine kinase;Tyrosine-protein kinase Yes	Yes1	8	54.269	1013900000	119	23.7741	23.5677	23.6946	23.8017	23.8045	24.0513	24.0263	23.8511	23.6937	23.8845	23.6037	23.9355	23.58	23.8008	23.6567	24.5982	24.3056	24.6312	23.7683	23.7325	23.7875	23.8827	24.0304	23.9519	23.7416	23.784	24.0766	23.5628	23.4939	23.4919	24.0552	24.3362	24.117	23.6113	23.6607	23.5721	23.8216	23.8722	24.0062	23.3815	23.5308
0.0373732	0.162141	A0A0G2K2Z0;F1LT71		Eml4	21	101.9	2066700000	193	24.4209	24.6728	24.6584	24.4464	24.2401	24.5826	24.6867	24.766	24.7096	24.8141	24.7495	24.8545	24.8426	24.7786	24.9449	25.7984	25.6996	25.0779	24.5579	24.5444	24.466	24.8699	25.1787	24.957	24.929	25.0914	24.9992	24.3199	24.3627	24.6956	24.7587	24.3809	24.3461	24.7601	24.6039	24.5585	24.7469	24.8192	25.099	24.7746	24.8226
1	NaN	A0A0G2K350;D4A0E2		Napg	8	34.659	351170000	17	NaN	NaN	NaN	NaN	NaN	NaN	NaN	NaN	NaN	NaN	NaN	NaN	NaN	NaN	NaN	NaN	NaN	NaN	NaN	NaN	NaN	NaN	NaN	NaN	NaN	NaN	NaN	NaN	NaN	NaN	NaN	NaN	NaN	NaN	NaN	NaN	NaN	NaN	NaN	NaN	NaN
1	NaN	A0A0G2K351;Q62885	Protein unc-119 homolog A	Unc119	2	28.407	55374000	1	NaN	NaN	NaN	NaN	NaN	NaN	NaN	NaN	NaN	NaN	NaN	NaN	NaN	NaN	NaN	NaN	NaN	NaN	NaN	NaN	NaN	NaN	NaN	NaN	NaN	NaN	NaN	NaN	NaN	NaN	NaN	NaN	NaN	21.6943	NaN	NaN	NaN	NaN	NaN	NaN	NaN
0.510444	0.0670125	A0A0G2K376;B6RIU0;Q5U317	Pre-mRNA 3-end-processing factor FIP1	Fip1l1	3	64.958	207690000	43	NaN	21.7626	NaN	NaN	NaN	22.005	NaN	21.3398	21.7131	21.7512	21.8293	21.7768	21.9186	21.7663	22.0176	NaN	NaN	NaN	NaN	22.471	NaN	21.7447	21.8169	21.9773	21.8006	21.6657	21.77	NaN	NaN	NaN	NaN	NaN	NaN	21.7337	21.7412	NaN	21.9419	21.7481	21.691	21.9032	21.8757
0.00512148	-0.212631	A0A0G2K398;F8WFK6;P36970	Glutathione peroxidase;Phospholipid hydroperoxide glutathione peroxidase, mitochondrial	Gpx4	4	22.074	640400000	91	23.3366	23.0758	23.0611	23.1923	23.3101	23.3019	23.3906	23.6215	23.2221	23.0402	NaN	22.9324	23.3198	22.9461	NaN	NaN	NaN	NaN	NaN	NaN	NaN	23.3056	23.4176	23.2758	23.2012	23.0794	23.3651	23.3565	23.2774	23.4832	NaN	23.2921	NaN	23.0601	23.1252	23.0253	23.4165	23.2801	23.1223	NaN	23.1753
0.1971	0.102651	A0A0G2K3A7;F1M885		Myo7b	51	241.3	5307800000	482	26.1935	25.9723	26.24	26.477	26.7111	26.3089	26.1965	26.2155	26.411	26.3718	26.3136	26.1888	26.179	26.2009	26.0989	25.1334	26.3624	25.7681	26.3811	26.4092	26.3611	26.3342	26.2944	26.3712	26.5027	26.3334	26.353	26.2055	25.9649	25.9158	26.3483	26.4696	26.3641	26.1331	26.0453	26.0145	26.3015	26.4332	26.2694	26.2202	26.268
0.571349	0.0897932	F1LRS2;A0A0G2K3H2;Q45N69;B2RZA1;F1LPG2		Dock7	8	240.06	319890000	35	NaN	NaN	22.5306	NaN	NaN	NaN	22.5749	NaN	22.7445	22.4032	22.374	22.219	NaN	NaN	22.5128	NaN	NaN	NaN	NaN	NaN	NaN	NaN	NaN	22.4192	NaN	NaN	22.3836	22.6502	NaN	NaN	NaN	NaN	NaN	NaN	NaN	NaN	22.7759	NaN	NaN	NaN	22.665
1	NaN	D3ZBP2;A0A0G2K3H5		Sin3a	4	127.8	129690000	5	NaN	NaN	NaN	NaN	NaN	NaN	NaN	NaN	NaN	NaN	NaN	NaN	NaN	NaN	NaN	NaN	NaN	NaN	NaN	NaN	NaN	NaN	NaN	NaN	NaN	NaN	NaN	NaN	NaN	NaN	NaN	NaN	NaN	NaN	NaN	NaN	NaN	NaN	NaN	NaN	NaN
0.0217544	-0.141466	B5DFF7;G3V9L3;A0A0G2K3I9		Dusp3	7	20.468	3074100000	335	25.1119	25.2335	25.2375	25.9479	25.8013	25.7845	25.3341	25.3807	25.3519	25.2221	25.3039	25.3103	25.3066	25.2013	25.3691	NaN	NaN	NaN	25.7515	25.5635	25.611	25.169	24.8599	25.1159	25.4404	25.389	25.4523	25.7327	25.6477	25.662	25.0312	25.2511	25.3313	25.4493	25.4024	25.4818	25.3813	25.3493	25.4902	25.5118	25.4764
1	NaN	A0A0G2K3L8;Q5U2Y7			4	46.175	321310000	4	NaN	NaN	NaN	NaN	NaN	NaN	NaN	NaN	NaN	NaN	NaN	NaN	NaN	NaN	NaN	NaN	NaN	NaN	NaN	NaN	NaN	NaN	NaN	NaN	NaN	NaN	NaN	NaN	NaN	NaN	NaN	NaN	NaN	NaN	NaN	NaN	NaN	NaN	NaN	NaN	NaN
0.382805	-0.0892154	D3ZZ81;A0A0G2K3L9;A0A1B0GWM2;A0A1B0GWS0;A0A1B0GWW5;F1M8A4;F1M863;Q91Z80;Q562A3	Liprin-alpha-4	Ppfia1;Ppfia2;Ppfia4	4	134.63	1661100000	12	24.4674	NaN	24.1017	NaN	NaN	NaN	NaN	NaN	NaN	24.6467	NaN	NaN	24.6814	24.6676	24.656	NaN	NaN	NaN	24.8866	NaN	24.7798	NaN	24.6415	24.6339	24.5881	NaN	24.5863	NaN	24.3994	NaN	NaN	NaN	NaN	24.5276	NaN	24.6521	NaN	NaN	NaN	NaN	25.1164
0.925691	0.00809666	A0A0G2K3N1;F1M8X9		Gbf1	12	205.33	572170000	66	NaN	22.9429	22.8614	23.4427	23.2362	23.4037	23.1611	22.8927	23.033	23.385	23.0755	22.9872	22.9759	23.205	23.2243	NaN	NaN	NaN	23.3328	NaN	23.1351	23.2914	23.0386	23.041	23.061	23.2999	23.2036	23.1525	22.9752	NaN	23.3313	NaN	23.2977	NaN	22.941	22.8835	23.0828	22.8577	NaN	23.2383	23.1493
0.361988	-0.109827	A0A0G2K3R7;Q5M808	Protein Hikeshi		3	20.584	227850000	58	NaN	22.2772	NaN	NaN	NaN	NaN	21.964	22.3636	22.0975	22.0697	NaN	22.2507	22.2712	NaN	NaN	NaN	NaN	NaN	NaN	NaN	NaN	22.144	NaN	NaN	22.3397	22.2047	NaN	NaN	NaN	NaN	NaN	NaN	NaN	NaN	NaN	NaN	22.1217	21.8171	21.9544	21.717	21.881
1	NaN	M0RDZ5;M0RDL2;M0RC23;F1M7B3;D3ZIL8;A0A0G2K3S3;M0RD98;M0R7M5			2	10.439	196100000	12	NaN	NaN	NaN	23.6564	24.1809	24.0292	NaN	NaN	NaN	NaN	NaN	NaN	NaN	NaN	NaN	NaN	NaN	NaN	NaN	NaN	NaN	NaN	NaN	NaN	NaN	NaN	NaN	23.9737	23.9888	23.9766	NaN	NaN	23.6982	NaN	NaN	NaN	NaN	NaN	NaN	NaN	NaN
1	NaN	A0A0G2K3U1;Q02356	AMP deaminase 2	Ampd2	2	92.084	153150000	3	NaN	NaN	NaN	NaN	NaN	NaN	NaN	NaN	NaN	NaN	NaN	NaN	NaN	NaN	NaN	25.0523	25.5908	24.2994	NaN	NaN	NaN	NaN	NaN	NaN	NaN	NaN	NaN	NaN	NaN	NaN	NaN	NaN	NaN	NaN	NaN	NaN	NaN	NaN	NaN	NaN	NaN
0.172506	-0.130984	A0A0G2K3V4;G3V6F4;P56558;A0A096MJY3	UDP-N-acetylglucosamine--peptide N-acetylglucosaminyltransferase 110 kDa subunit	Ogt	7	116.95	241060000	96	NaN	NaN	NaN	NaN	NaN	NaN	21.8895	NaN	22.1448	22.2051	21.7117	22.5198	21.9597	22.3155	22.0372	NaN	NaN	NaN	NaN	22.4446	NaN	22.0412	22.09	22.1386	22.1801	22.1179	NaN	NaN	NaN	NaN	22.2552	NaN	NaN	22.0869	NaN	21.8234	22.0317	NaN	NaN	21.9748	22.285
1	NaN	A0A0G2K3V7;Q9WUL0	DNA topoisomerase 1	Top1	1	88.577	48481000	19	NaN	NaN	NaN	NaN	NaN	NaN	NaN	NaN	NaN	NaN	NaN	NaN	NaN	NaN	NaN	NaN	NaN	NaN	NaN	NaN	NaN	NaN	NaN	NaN	NaN	NaN	NaN	NaN	NaN	NaN	NaN	NaN	NaN	NaN	NaN	NaN	NaN	NaN	NaN	NaN	NaN
1	NaN	A0A0G2K3W1			3	53.76	147850000	6	NaN	NaN	NaN	NaN	NaN	NaN	NaN	NaN	NaN	NaN	NaN	NaN	NaN	NaN	NaN	NaN	NaN	NaN	NaN	NaN	NaN	NaN	NaN	NaN	NaN	NaN	NaN	NaN	NaN	NaN	NaN	22.3565	NaN	NaN	NaN	NaN	NaN	NaN	NaN	NaN	NaN
1	NaN	A0A0G2K3Z3;B0BN19;A0A0G2JSZ1;Q6GQP4	Ras-related protein Rab-31	Rab22a;Rab31	2	20.841	136860000	43	NaN	NaN	NaN	NaN	NaN	NaN	NaN	NaN	NaN	NaN	NaN	NaN	NaN	NaN	NaN	NaN	NaN	NaN	NaN	NaN	NaN	NaN	NaN	NaN	NaN	NaN	NaN	NaN	NaN	NaN	NaN	NaN	NaN	NaN	NaN	NaN	22.0423	NaN	NaN	NaN	NaN
0.275518	0.0615214	A0A0G2K3Z9;Q63716	Peroxiredoxin-1	Prdx1	25	22.164	84807000000	1585	30.095	30.0464	30.1121	29.9304	30.1326	30.1709	30.2837	30.3702	30.3134	30.4992	30.4042	30.3667	30.1554	30.1568	30.1855	29.7483	29.6403	29.9106	30.0856	30.1319	30.112	30.1269	30.1342	30.1721	30.4681	30.4651	30.3352	30.0691	30.0882	30.1557	30.0375	29.9404	30.02	30.0646	30.0945	30.0766	30.3112	30.2969	30.2438	30.2185	30.2459
0.0198055	-0.118661	A0A0G2K401;A0A0G2K5P9			34	79.811	8462400000	735	26.5774	26.6787	26.6457	26.5331	26.648	26.4813	26.9648	27.0066	27.1241	26.9943	27.1627	27.064	26.7174	26.8815	26.7853	26.8514	26.7693	26.7498	27.0907	27.0956	27.1153	26.9753	26.731	26.827	26.8065	26.9072	26.8585	26.7722	26.7832	26.6946	26.7525	26.8579	26.8523	26.8367	26.7839	26.7977	26.8156	26.8439	26.831	26.9351	26.8637
1	NaN	D4AEI5;A0A0G2K402		Myef2	3	63.349	109510000	5	NaN	NaN	NaN	NaN	NaN	NaN	NaN	NaN	NaN	NaN	NaN	NaN	NaN	NaN	NaN	NaN	NaN	NaN	NaN	NaN	NaN	NaN	NaN	NaN	NaN	NaN	NaN	NaN	NaN	NaN	NaN	NaN	NaN	NaN	NaN	NaN	NaN	NaN	NaN	NaN	NaN
1	NaN	A0A0G2K412;D3ZWW0		Slc35c1	3	38.255	479680000	12	22.987	22.9279	NaN	NaN	NaN	NaN	NaN	NaN	NaN	NaN	NaN	NaN	NaN	NaN	NaN	NaN	NaN	NaN	NaN	NaN	NaN	NaN	NaN	NaN	NaN	NaN	NaN	NaN	NaN	NaN	NaN	NaN	NaN	NaN	NaN	NaN	NaN	NaN	23.2458	NaN	NaN
1	NaN	A0A0G2K427;A0A0G2QC03;Q0IKU7		Ivns1abp	3	71.508	94813000	6	NaN	NaN	NaN	NaN	NaN	NaN	NaN	NaN	NaN	NaN	NaN	NaN	NaN	NaN	NaN	NaN	NaN	NaN	NaN	NaN	NaN	NaN	NaN	NaN	NaN	NaN	NaN	NaN	NaN	NaN	NaN	NaN	NaN	NaN	NaN	NaN	NaN	NaN	NaN	NaN	NaN
0.0239835	0.076681	A0A0G2K428;D4A8U7;P28023	Dynactin subunit 1	Dctn1	37	139.84	6611400000	489	26.4337	26.5923	26.448	26.4944	26.6203	26.3561	26.5163	26.5119	26.5209	26.7234	26.661	26.615	26.5225	26.6168	26.6167	25.919	26.2304	25.8894	26.3278	26.4331	26.3321	26.5208	26.2239	26.4647	26.6607	26.6525	26.6245	26.4609	26.257	26.2351	26.5125	26.5631	26.3411	26.5852	26.5432	26.4833	26.5983	26.5548	26.6348	26.4653	26.3134
1	NaN	G3V8B8;Q75N36;A0A0G2K435		Dnajc7	5	50.1	87590000	5	NaN	NaN	NaN	NaN	NaN	NaN	NaN	NaN	NaN	NaN	NaN	NaN	NaN	NaN	NaN	NaN	NaN	NaN	NaN	NaN	NaN	NaN	NaN	NaN	NaN	NaN	NaN	NaN	NaN	NaN	NaN	21.8908	21.912	NaN	NaN	NaN	NaN	NaN	NaN	NaN	NaN
1	NaN	Q5XI09;A0A0G2K444;A0A0G2K6Q5;Q6MG06	Guanine nucleotide-binding protein-like 1	Gnl1	2	53.771	364300000	18	NaN	NaN	NaN	NaN	NaN	NaN	NaN	NaN	NaN	NaN	NaN	NaN	NaN	NaN	NaN	NaN	NaN	NaN	NaN	NaN	NaN	NaN	NaN	NaN	NaN	NaN	NaN	NaN	NaN	NaN	NaN	NaN	NaN	NaN	NaN	NaN	NaN	NaN	NaN	NaN	NaN
0.580812	-0.0458878	A0A0G2K459;B0BN52;A0A0G2K7P7		Mtch2	9	33.757	1667600000	176	24.305	24.4359	24.546	24.7205	24.8151	24.9478	24.7017	24.7639	24.7538	24.5361	24.5173	24.4016	24.236	24.2304	24.3597	24.4412	25.169	25.5631	24.598	24.4714	24.1507	24.906	24.7449	24.8384	24.1462	24.3621	24.1867	24.8205	24.9063	25.1489	24.2863	24.2775	23.9881	24.7173	24.5341	24.5752	24.1797	24.052	24.1029	24.5416	24.2736
0.884314	-0.0167241	A0A0G2K466;D4A0Y4		Oxnad1	5	34.847	382150000	90	22.5794	22.2452	22.1188	22.7578	23.057	22.5404	22.2436	22.4851	22.3594	22.455	22.4656	22.3523	22.3926	NaN	22.4003	NaN	NaN	NaN	23.2044	23.07	22.817	22.4625	22.5575	22.4244	22.2388	22.3833	22.97	22.8876	22.3315	22.4516	NaN	22.5035	22.5493	22.2936	22.2389	22.4153	22.5183	22.2963	22.5838	22.586	22.8701
0.190892	-0.190978	A0A0G2K470;Q924S3			11	128.84	780950000	55	23.4178	24.0455	23.6303	23.8678	23.9883	24.032	23.4061	23.5439	23.7864	23.4296	23.3987	23.4399	23.4805	23.1642	23.097	NaN	NaN	NaN	23.7096	23.6872	23.9125	23.4468	23.8709	23.6191	NaN	23.4858	NaN	23.6191	NaN	23.3427	23.8546	24.3003	NaN	22.9974	23.4962	NaN	NaN	NaN	23.2656	23.5852	23.6518
1	NaN	J7P1Z1;B2GV84;A1L1K2;A0A0G2K471;F7F469;Q7TPJ1		Irgm2;Igtp	1	45.5	78442000	2	NaN	NaN	NaN	NaN	NaN	NaN	NaN	NaN	NaN	NaN	NaN	NaN	NaN	NaN	NaN	NaN	NaN	NaN	NaN	NaN	NaN	NaN	NaN	NaN	NaN	NaN	NaN	NaN	NaN	NaN	NaN	NaN	NaN	NaN	NaN	NaN	NaN	NaN	NaN	NaN	NaN
0.332968	-0.0659321	A0A0G2K472;D3ZX82			35	144.93	5246800000	405	25.8419	26.1131	25.8484	26.4002	26.2545	26.2598	26.2918	26.173	25.9742	26.1274	26.0541	26.0882	26.0629	26.1577	26.2131	26.34	26.2075	26.3168	25.9962	25.948	26.1068	26.0803	26.1977	26.0768	26.2729	26.4746	26.4423	26.2343	26.3914	26.3897	26.1518	26.1325	26.0586	25.891	25.7907	25.9358	26.1065	26.0525	26.0692	26.0297	26.0365
0.216805	-0.420758	A0A0G2K477;P20762			4	51.136	860640000	48	22.7316	22.7341	22.603	23.9601	NaN	23.397	22.7997	23.8763	22.8544	23.2828	22.9734	23.3506	22.8171	22.7277	22.8058	24.0975	23.9023	NaN	NaN	NaN	NaN	23.1996	23.0363	23.1417	23.4288	23.8532	23.5614	23.8703	23.6034	23.5484	NaN	NaN	23.6219	23.045	22.4719	22.8325	24.7856	24.3294	24.798	23.8233	23.8091
0.221953	-0.0559896	D3ZDE4;A0A0G2K478;B5DEP0		Dguok	7	32.227	1312000000	181	24.2292	24.2436	23.8803	24.2278	24.2658	24.1196	24.2855	24.1141	24.3215	24.0897	24.1061	24.1124	24.0826	24.0683	23.9789	NaN	NaN	24.5558	24.1778	24.0518	24.2085	24.1453	24.1284	24.2163	23.9715	24.032	23.9894	23.9495	24.2917	23.762	24.0859	24.1046	24.0855	24.2377	24.2481	24.1609	24.192	24.2307	24.2646	24.0413	24.0797
1	NaN	A0A0G2K4A0			2	68.761	0	4	NaN	NaN	NaN	NaN	NaN	NaN	NaN	NaN	NaN	NaN	NaN	NaN	NaN	NaN	NaN	NaN	NaN	NaN	NaN	NaN	NaN	NaN	NaN	NaN	NaN	NaN	NaN	NaN	NaN	NaN	NaN	NaN	NaN	NaN	NaN	NaN	NaN	NaN	NaN	NaN	NaN
0.69333	-0.109473	D3ZXT2;A0A0G2K4D9;D4A3Q2;A0A0G2K9G6		Stag2	6	141.31	314710000	26	NaN	NaN	NaN	NaN	NaN	NaN	23.0726	NaN	23.259	NaN	NaN	23.2185	NaN	23.1749	23.1234	NaN	NaN	NaN	NaN	NaN	NaN	NaN	NaN	NaN	NaN	23.7917	NaN	NaN	NaN	NaN	NaN	NaN	NaN	NaN	22.752	NaN	NaN	NaN	NaN	NaN	NaN
0.221503	0.170722	B2RYB3;A0A0G2K4F6		Srrm1	5	102.43	378960000	149	NaN	22.4626	22.3877	23.2897	23.1292	NaN	22.2717	22.5177	22.3469	22.4806	22.4946	22.1794	NaN	NaN	22.7371	NaN	NaN	NaN	22.607	22.7121	22.5348	23.0582	23.3975	23.5837	23.0344	23.1118	22.8117	22.5932	23.1199	23.1203	22.3924	NaN	22.7732	NaN	22.5183	NaN	22.5369	NaN	22.2659	NaN	23.0737
0.581006	-0.0553541	A0A0G2K4G3;Q71UE8	NEDD8	Nedd8	3	8.9882	2566100000	136	25.4101	25.1361	25.0616	25.742	25.7776	25.3749	25.1522	24.8768	24.9192	25.3843	25.2064	25.3685	25.1197	25.0503	24.9774	NaN	NaN	NaN	25.1151	25.0519	25.192	25.0722	25.1785	25.3151	25.3564	25.6005	25.171	26.1976	25.9372	25.6664	25.3665	25.4024	25.298	25.2168	25.1613	25.236	24.52	24.6462	25.1746	25.2548	25.4146
0.848735	-0.0501841	A0A0G2K4G7;Q4KLY3	V-set and immunoglobulin domain-containing protein 1	Vsig1	3	48.013	243220000	36	22.321	22.3604	NaN	NaN	NaN	22.1789	22.473	NaN	NaN	22.1411	22.3571	22.7772	22.893	NaN	NaN	NaN	NaN	NaN	NaN	NaN	NaN	NaN	22.3119	NaN	NaN	NaN	NaN	NaN	22.0075	22.1411	NaN	NaN	NaN	NaN	NaN	NaN	NaN	NaN	NaN	NaN	NaN
0.000626139	-0.290576	A0A0G2K4M6;B0BMT0;P62738	Actin, aortic smooth muscle	Acta2	66	41.924	4674000000000	11272	35.7947	35.8279	35.8279	35.8845	35.9437	35.8456	35.8127	35.8462	35.7904	36.0456	36.0172	36.0143	35.825	35.8009	35.8051	36.5566	36.5266	36.4468	36.1492	36.0972	36.1468	35.9636	35.9754	35.9988	35.7969	35.7437	35.7839	36.1657	36.0163	36.0551	36.1595	36.1701	36.1039	36.0964	36.1846	36.2014	35.7785	35.7682	35.7913	35.8518	35.8467
0.851881	-0.0149888	A0A0G2K4R1			29	84.765	3226500000	453	25.1336	25.2671	25.4654	25.1575	25.1551	25.1465	25.3344	25.2421	25.2161	25.3573	25.4085	25.4529	25.5529	25.3539	25.3945	26.138	26.3426	26.2069	25.2426	25.1372	24.9367	25.0528	25.1515	25.1377	25.5246	25.3562	25.4881	25.3795	25.6926	25.5961	25.1276	25.2085	25.1727	25.6447	25.7037	25.6394	25.2633	25.3255	25.3159	25.5748	25.5887
0.0135686	0.209884	Q5FVC7;A0A0G2K4T3;D4A346	Arf-GAP with coiled-coil, ANK repeat and PH domain-containing protein 2	Acap2	8	87.229	426770000	111	22.8451	23.0464	23.0031	NaN	22.8315	22.6563	22.6383	22.6374	22.6244	22.5793	23.0016	22.296	22.7418	22.7838	23.1337	NaN	NaN	NaN	NaN	NaN	NaN	22.4512	NaN	22.6976	23.1628	23.2807	22.8479	NaN	22.9859	22.9423	NaN	NaN	NaN	22.4262	22.7488	22.802	NaN	NaN	NaN	22.9952	23.1293
1	NaN	Q5U2Y1;A0A0G2K4T7;A0A1B0GWN0	General transcription factor II-I	Gtf2i	5	110.21	164420000	9	NaN	NaN	NaN	NaN	NaN	NaN	NaN	NaN	NaN	NaN	NaN	22.1267	NaN	NaN	NaN	NaN	NaN	NaN	NaN	NaN	NaN	NaN	NaN	NaN	NaN	NaN	NaN	NaN	NaN	NaN	NaN	NaN	NaN	NaN	NaN	NaN	NaN	NaN	NaN	NaN	NaN
1	NaN	A0A0G2K4T8;F1LPX0;Q01992	Mitochondrial intermediate peptidase	Mipep	3	80.875	221190000	3	NaN	NaN	NaN	NaN	21.4458	NaN	NaN	22.0505	NaN	NaN	NaN	NaN	NaN	NaN	NaN	NaN	NaN	NaN	NaN	NaN	NaN	NaN	NaN	NaN	NaN	NaN	NaN	NaN	NaN	NaN	NaN	NaN	NaN	NaN	NaN	NaN	NaN	NaN	NaN	NaN	NaN
1	NaN	A0A0G2K4V4;D3Z9P1		Kdsr	2	34.156	445730000	49	NaN	NaN	NaN	NaN	NaN	NaN	NaN	NaN	NaN	NaN	NaN	NaN	NaN	NaN	NaN	NaN	NaN	NaN	NaN	NaN	NaN	24.009	NaN	NaN	NaN	NaN	NaN	NaN	NaN	NaN	NaN	23.2564	NaN	NaN	23.6329	NaN	NaN	NaN	NaN	NaN	NaN
0.778346	-0.0204749	F1LSD3;A0A0G2K4V5;Q64632	Integrin beta;Integrin beta-4	Itgb4	25	200.42	2209700000	264	25.0119	24.8551	24.857	25.0503	25.0218	24.8975	24.8179	24.7975	24.8322	25.0755	24.9779	25.2319	25.0129	25.1297	24.8394	24.7866	24.3233	25.591	24.9604	24.7261	24.4812	25.0239	24.9242	24.8153	24.7997	24.7175	24.6913	24.8963	24.8481	24.6752	25.3098	25.2925	25.001	24.7421	24.7549	24.8431	25.08	24.9597	24.7935	24.8584	24.6008
1	NaN	D4A3I4;A0A0G2K4W2	Transcription factor BTF3	Btf3l4	2	17.27	398170000	86	NaN	NaN	NaN	NaN	NaN	NaN	NaN	NaN	NaN	NaN	NaN	NaN	NaN	NaN	NaN	NaN	NaN	NaN	NaN	NaN	NaN	NaN	NaN	NaN	NaN	NaN	NaN	NaN	NaN	NaN	NaN	NaN	NaN	NaN	NaN	NaN	NaN	NaN	NaN	NaN	NaN
0.0852411	0.246628	A0A0G2K4X8;Q6PEC4	S-phase kinase-associated protein 1	Skp1	9	18.931	5331500000	276	26.1391	26.191	26.1121	26.4696	26.3445	26.4006	26.3367	26.3236	26.2703	25.8568	26.0318	26.0122	26.3678	26.3534	26.4305	NaN	NaN	NaN	25.0744	25.512	24.889	25.9018	26.1455	25.8946	26.3661	26.3526	26.4084	26.2034	26.3437	26.3044	26.0577	26.0834	25.9023	25.9405	25.7439	25.815	25.9684	26.106	26.1477	26.3938	26.2446
0.528334	-0.0766742	G3V6I5;A1KXF7;Q2TVU3;A0A0G2K4Y1;Q2UZS7;A0A0G2K5E4		Dnaja3	4	46.776	465270000	80	22.4893	22.8008	22.4512	23.2557	23.1059	NaN	22.7843	22.9818	22.6436	22.5086	22.9217	22.8231	22.8936	23.0595	22.7869	NaN	NaN	NaN	23.2196	23.1798	23.3684	23.0152	22.9344	22.8457	NaN	NaN	NaN	NaN	22.827	22.8253	23.006	22.8405	NaN	22.8528	23.0039	22.9464	22.8245	23.1321	NaN	22.9803	23.137
0.0379645	-0.12251	D3ZJH9;A0A0G2K502;A0A0G2K4C6;F1M5N4	Malic enzyme	Me2	17	65.351	4462000000	434	25.8016	25.966	25.8553	26.2598	26.2649	26.2994	25.7694	25.9475	26.0708	25.6884	25.7743	25.8986	25.9965	26.0619	25.9135	NaN	NaN	NaN	26.3189	26.3062	26.3151	25.8592	25.9308	25.9037	26.0312	25.8527	25.9449	26.149	26.2982	26.2644	25.9285	25.8781	26.0652	25.798	25.9131	25.8696	25.8127	26.0142	25.8674	26.3054	26.2564
1	NaN	Q1PBJ1;A0A0G2K506;P70490	Lactadherin	Mfge8	2	53.1	1322600	1	NaN	NaN	NaN	NaN	NaN	NaN	NaN	NaN	NaN	NaN	NaN	NaN	NaN	NaN	NaN	NaN	NaN	NaN	NaN	NaN	NaN	NaN	NaN	NaN	NaN	NaN	NaN	NaN	NaN	NaN	NaN	NaN	NaN	NaN	NaN	NaN	NaN	NaN	NaN	NaN	17.1386
1	NaN	A0A0G2K527;Q9Z272	ARF GTPase-activating protein GIT1	Git1	5	83.366	124100000	10	NaN	NaN	NaN	NaN	NaN	NaN	NaN	NaN	NaN	NaN	NaN	NaN	22.7841	NaN	NaN	NaN	NaN	NaN	NaN	NaN	NaN	NaN	NaN	NaN	NaN	NaN	NaN	NaN	NaN	NaN	NaN	NaN	NaN	NaN	NaN	NaN	NaN	NaN	NaN	NaN	NaN
0.350588	-0.138317	A0A0G2K531;P23764;A0A0G2JXN4;D3ZH29;Q64625	Glutathione peroxidase 3	Gpx3	7	25.274	2700700000	196	25.3319	25.3342	25.4014	25.8801	26.0483	25.8959	25.139	24.9305	25.2043	24.9635	25.0757	25.034	25.0669	24.9946	24.9498	NaN	NaN	NaN	24.7801	24.8996	24.9092	25.1139	25.0702	25.0818	24.8967	24.6905	25.0008	25.784	26.0316	25.7672	24.7328	24.5571	24.6081	25.1269	24.9297	25.2159	24.4846	24.4111	24.5961	25.6666	25.8625
0.416952	0.0970961	F1LPB4;A0A0G2K548;Q30A01;Q8K4S6;Q4G046		Akap9	7	433.94	15838000000	24	27.4075	27.4192	27.3126	28.1325	28.0948	28.1649	27.9138	27.8347	27.987	27.5912	27.6424	27.696	27.7449	27.817	27.803	26.6065	26.7645	26.7098	27.5943	27.627	27.5942	26.8541	26.9729	27.0304	28.4153	28.4947	28.3677	NaN	27.8181	NaN	27.7885	27.6786	27.7161	27.5055	27.4003	27.3936	27.5925	27.3218	27.2957	27.8533	NaN
0.0142657	-0.129746	A0A0G2K583;Q7TP15	S-methyl-5-thioadenosine phosphorylase	Mtap	11	31.089	3742800000	284	25.5967	25.6259	25.5967	25.9865	26.0962	26.0174	25.7985	25.8261	25.7925	25.7704	25.742	25.7182	25.7267	25.6757	25.6937	25.4283	24.9055	25.4714	25.8778	25.7354	25.9356	25.4601	25.323	25.3553	25.7311	25.5779	25.7348	25.7406	25.7116	25.7028	25.6287	25.71	25.8032	25.4701	25.576	25.468	25.8938	25.8627	25.9742	25.683	25.5588
1	NaN	A0A0G2K584;Q8K3F4	Protein phosphatase 1 regulatory subunit 14D	Ppp1r14d	3	15.836	158160000	30	NaN	NaN	NaN	NaN	NaN	NaN	NaN	NaN	NaN	NaN	22.3401	NaN	NaN	NaN	NaN	NaN	NaN	NaN	NaN	NaN	NaN	22.5966	NaN	NaN	NaN	NaN	NaN	NaN	NaN	NaN	NaN	NaN	NaN	NaN	NaN	NaN	NaN	NaN	NaN	NaN	NaN
0.0277389	0.574904	Q5XFV4;A0A0G2K586;P70623;Q9R290;D3ZFG5;P55054	Fatty acid-binding protein, adipocyte	Fabp4	13	14.736	12744000000	417	27.7077	27.6	27.547	26.181	26.2515	26.1916	26.9248	26.995	26.9822	25.9456	25.7843	25.9254	27.1674	27.148	27.0499	NaN	24.3935	24.5333	26.4401	26.4993	26.3953	27.7418	27.7214	27.7694	26.9445	26.9972	26.946	28.1679	28.2225	28.2572	26.4209	26.4091	26.6075	27.3874	27.4091	27.4203	26.3063	26.3413	26.4992	28.3695	28.2264
0.00955796	-0.301449	A0A0G2K588;D4A917		Ltbp4	7	154.01	282060000	83	NaN	22.0613	NaN	22.0631	22.3122	22.2582	21.881	21.7756	22.1553	21.8448	NaN	21.9067	NaN	21.719	21.9758	23.0817	NaN	22.8747	22.0733	22.2111	22.4429	22.0285	21.6774	NaN	22.0542	21.9955	NaN	22.1333	21.7372	21.5439	NaN	NaN	NaN	22.2845	21.6237	21.8482	NaN	NaN	21.9705	22.3229	22.0481
0.136736	-0.157638	D3ZXK3;A0A0G2K598;X4YHC6;D4A858		Tacc2	5	300.23	2805400000	61	NaN	NaN	NaN	25.4554	25.2564	25.3479	25.203	NaN	25.1559	NaN	25.2068	NaN	25.2589	25.1018	NaN	NaN	NaN	NaN	NaN	25.4084	NaN	25.784	25.4342	NaN	NaN	NaN	24.9153	NaN	25.7286	NaN	NaN	NaN	NaN	NaN	NaN	25.5127	24.8337	NaN	24.9065	25.4144	25.3849
1	NaN	A0A0G2K5A0			2	26.139	30742000	2	NaN	NaN	NaN	NaN	NaN	NaN	NaN	NaN	NaN	NaN	NaN	20.0735	NaN	NaN	NaN	NaN	NaN	NaN	NaN	NaN	NaN	NaN	NaN	NaN	NaN	NaN	NaN	NaN	NaN	NaN	NaN	NaN	NaN	NaN	NaN	NaN	NaN	NaN	NaN	NaN	NaN
0.79277	-0.019574	A0A0G2K5A4;D3ZLD5		Golga3	17	162.36	865200000	101	23.4087	23.4644	23.4928	22.9487	23.228	23.2505	23.518	23.611	23.7548	23.7519	23.7645	23.8085	23.7362	23.5204	23.5565	NaN	NaN	NaN	23.5636	23.2942	23.9049	23.7195	23.4684	23.738	23.6776	23.2048	23.6456	23.114	22.9134	23.1869	24.0312	23.2637	23.7152	23.4695	23.4784	23.4707	23.6116	23.5716	24.0344	23.294	23.2879
1	NaN	A0A0G2K5B6;F1LNQ2		Ambra1	1	133.22	0	1	NaN	NaN	NaN	NaN	NaN	NaN	NaN	NaN	NaN	NaN	NaN	NaN	NaN	NaN	NaN	NaN	NaN	NaN	NaN	NaN	NaN	NaN	NaN	NaN	NaN	NaN	NaN	NaN	NaN	NaN	NaN	NaN	NaN	NaN	NaN	NaN	NaN	NaN	NaN	NaN	NaN
0.189368	0.123198	G3V7U2;A0A0G2K5C6;P34926;Q63330	Microtubule-associated protein 1A;MAP1A heavy chain;MAP1 light chain LC2	Map1a	7	299.66	255200000	69	22.1145	22.2405	22.0675	NaN	21.2087	21.0951	NaN	22.2774	22.0881	NaN	22.109	22.3722	22.0892	22.2416	22.1972	NaN	NaN	NaN	NaN	21.7536	21.8696	21.8354	21.5042	NaN	22.0366	22.043	22.5576	NaN	NaN	21.7072	NaN	NaN	22.2373	22.4005	NaN	NaN	21.8556	22.2311	NaN	21.8889	21.9291
1	NaN	Q7TP67;A0A0G2K5D3;A0A096MK99;A0A0G2KAM1;Q5U213;A0A096MKC9		Mphosph8;Parp4	2	188.81	88980000	9	NaN	NaN	NaN	NaN	NaN	NaN	NaN	NaN	NaN	NaN	NaN	NaN	NaN	NaN	NaN	NaN	NaN	NaN	NaN	NaN	NaN	NaN	NaN	NaN	NaN	NaN	NaN	NaN	NaN	NaN	NaN	NaN	NaN	NaN	NaN	NaN	NaN	NaN	NaN	NaN	NaN
0.0111333	-0.118419	A0A0G2K5E7;G3V888;G3V9G4;P16638	ATP-citrate synthase	Acly	56	120.54	25233000000	1710	28.3353	28.3267	28.3672	28.6061	28.6642	28.6201	28.4178	28.535	28.5172	28.4761	28.5009	28.4309	28.3989	28.4081	28.388	28.4353	28.3989	28.6124	28.65	28.7262	28.5748	28.4734	28.4358	28.4792	28.2519	28.3157	28.2008	28.5476	28.6176	28.5998	28.5201	28.5148	28.3654	28.2689	28.2767	28.3333	28.4506	28.4688	28.5397	28.6279	28.5286
0.74834	0.086091	A0A0G2K5G6;G3V9X8;O35777	Magnesium transporter protein 1	Magt1	5	41.676	292470000	30	NaN	NaN	NaN	NaN	NaN	23.1327	NaN	NaN	NaN	NaN	NaN	NaN	23.2431	NaN	NaN	NaN	NaN	NaN	NaN	NaN	NaN	23.189	NaN	23.1798	NaN	NaN	NaN	NaN	NaN	NaN	NaN	NaN	NaN	NaN	NaN	23.3229	22.8498	NaN	NaN	23.0262	23.3572
1	NaN	A0A0G2K5G8;D3ZRA3;P11497;A0A0G2K5L6;Q1HEC0;A0A0G2K1F2	Acetyl-CoA carboxylase 1;Biotin carboxylase	Acaca	7	252.39	254170000	13	NaN	NaN	NaN	NaN	NaN	NaN	NaN	NaN	22.1853	NaN	NaN	NaN	NaN	NaN	NaN	NaN	NaN	NaN	NaN	NaN	NaN	NaN	NaN	NaN	NaN	NaN	NaN	NaN	NaN	NaN	NaN	NaN	NaN	NaN	NaN	NaN	NaN	NaN	NaN	NaN	22.7581
0.22643	0.231648	D3ZDB9;A0A0G2K5K3;P86172	NmrA-like family domain-containing protein 1	Nmral1	3	33.951	219340000	34	22.521	NaN	NaN	NaN	NaN	NaN	22.3168	21.6874	NaN	NaN	NaN	NaN	NaN	22.3054	NaN	NaN	NaN	NaN	NaN	NaN	NaN	NaN	NaN	NaN	NaN	22.2971	NaN	NaN	NaN	NaN	22.1606	NaN	NaN	NaN	22.338	22.2933	22.6048	NaN	NaN	NaN	NaN
0.508963	-0.0404153	A0A0G2K5N6;F1LQT3;Q62868	Rho-associated protein kinase 2	Rock2	20	160.6	1465200000	247	24.1297	24.3529	24.0985	24.5466	24.6306	24.3113	24.2768	24.1254	24.2643	24.3195	24.2274	24.2026	24.1457	24.2503	24.4352	24.2843	24.5518	25.2118	24.1098	24.1169	24.2559	24.1024	24.0408	23.8243	24.1934	24.1859	24.4845	24.3744	24.3038	24.1407	24.0894	24.3007	24.2337	24.1828	24.2526	24.212	24.0711	24.3481	24.4221	24.2971	24.21
1	NaN	B5LSW7;A0A0G2K5P7;B3VPA7;Q64611;Q9R1F5;Q9QYW2	Cysteine sulfinic acid decarboxylase	Csad	4	52.761	107170000	3	NaN	NaN	NaN	NaN	NaN	NaN	NaN	NaN	NaN	NaN	NaN	NaN	NaN	NaN	NaN	NaN	NaN	NaN	NaN	NaN	NaN	NaN	NaN	NaN	NaN	NaN	NaN	NaN	NaN	NaN	NaN	NaN	NaN	NaN	NaN	NaN	NaN	NaN	NaN	NaN	NaN
1	NaN	A0A0G2K5Q0;F1LS42;F1LS36;P68403;Q6LDV0	Protein kinase C;Protein kinase C beta type	Prkcb	5	74.531	109120000	17	NaN	NaN	NaN	NaN	NaN	NaN	NaN	NaN	NaN	NaN	NaN	NaN	NaN	NaN	NaN	NaN	NaN	NaN	NaN	NaN	NaN	NaN	NaN	NaN	NaN	NaN	NaN	NaN	23.3122	23.0998	NaN	NaN	NaN	NaN	NaN	NaN	NaN	NaN	NaN	22.9252	NaN
1	NaN	A0A0G2K5Q2;P63155	Crooked neck-like protein 1	Crnkl1	3	83.51	894200000	0	NaN	NaN	24.0786	NaN	NaN	NaN	NaN	NaN	NaN	NaN	NaN	NaN	NaN	NaN	NaN	NaN	NaN	NaN	NaN	NaN	NaN	NaN	NaN	NaN	NaN	NaN	NaN	NaN	NaN	NaN	NaN	NaN	NaN	NaN	NaN	NaN	NaN	NaN	NaN	NaN	NaN
1	NaN	A0A0G2K5Q8;E9PTW1;Q9ERM8		Scamp3	4	92.554	107630000	24	NaN	NaN	NaN	NaN	NaN	NaN	NaN	NaN	NaN	NaN	NaN	NaN	NaN	NaN	NaN	23.5808	NaN	NaN	NaN	NaN	NaN	NaN	NaN	NaN	NaN	NaN	NaN	NaN	NaN	NaN	NaN	NaN	NaN	NaN	NaN	NaN	NaN	NaN	NaN	NaN	NaN
0.00314451	-0.258254	A0A0G2K5U5;F1M7H2;A0A0G2K639;P15083	Polymeric immunoglobulin receptor;Secretory component	Pigr	16	84.604	2884700000	280	25.2559	25.1622	25.1462	25.9119	25.9314	25.8789	25.7766	25.6492	25.5898	25.1411	25.2803	25.2989	25.1305	25.1975	25.1743	24.7968	25.3246	25.3072	25.4555	25.1733	25.3224	25.1884	25.1832	25.2806	25.0693	24.8486	24.925	25.2114	25.2253	25.1105	25.314	25.1786	25.0567	25.2043	25.2466	25.1726	25.1103	25.1678	25.1196	24.9768	24.8808
1	NaN	A0A0G2K5Z1;G3V6C9;O54874	Non-specific serine/threonine protein kinase;Serine/threonine-protein kinase MRCK alpha	Cdc42bpa	2	186.78	754070000	10	NaN	NaN	NaN	NaN	NaN	NaN	NaN	NaN	NaN	NaN	NaN	NaN	NaN	NaN	NaN	NaN	NaN	NaN	NaN	NaN	NaN	NaN	NaN	NaN	NaN	NaN	NaN	NaN	NaN	NaN	NaN	NaN	NaN	NaN	NaN	NaN	NaN	NaN	NaN	NaN	NaN
0.76544	-0.12709	A0A0G2K613;Q9EPH2	MARCKS-related protein	Marcksl1	2	19.718	75813000	35	NaN	NaN	NaN	NaN	NaN	NaN	NaN	NaN	NaN	NaN	NaN	NaN	NaN	NaN	21.5573	NaN	NaN	NaN	NaN	NaN	NaN	NaN	NaN	NaN	20.8184	NaN	NaN	NaN	NaN	NaN	NaN	NaN	NaN	NaN	20.9344	NaN	20.987	NaN	NaN	NaN	NaN
1	NaN	A0A0G2K670;P62483	Voltage-gated potassium channel subunit beta-2	Kcnab2	1	42.805	13990000	3	NaN	NaN	NaN	NaN	NaN	NaN	NaN	NaN	NaN	NaN	NaN	NaN	NaN	NaN	NaN	NaN	NaN	NaN	NaN	NaN	NaN	NaN	NaN	NaN	NaN	NaN	NaN	NaN	NaN	NaN	NaN	NaN	NaN	NaN	NaN	NaN	NaN	NaN	NaN	NaN	NaN
1	NaN	A0A0G2K675;B4F7E0;Q2A121	Alpha-ketoglutarate-dependent dioxygenase FTO	Fto	2	59.081	10784000	1	NaN	NaN	NaN	NaN	NaN	NaN	NaN	NaN	NaN	NaN	NaN	NaN	NaN	NaN	NaN	NaN	NaN	NaN	NaN	NaN	NaN	NaN	NaN	NaN	NaN	NaN	NaN	NaN	NaN	NaN	NaN	NaN	NaN	NaN	NaN	NaN	NaN	NaN	NaN	NaN	21.3621
0.176427	-0.256903	A0A0G2K681;F1MAH8;Q9JK25;Q4V8P6;A0A0G2JTX8		Clip1	6	159.46	138950000	53	NaN	NaN	21.4165	NaN	NaN	NaN	NaN	22.1648	21.8982	22.0526	21.722	NaN	NaN	NaN	21.809	NaN	NaN	NaN	NaN	NaN	NaN	NaN	NaN	NaN	NaN	NaN	NaN	NaN	NaN	NaN	NaN	NaN	NaN	NaN	NaN	NaN	NaN	NaN	21.4925	NaN	NaN
0.428737	-0.236703	D4ACN7;A0A0G2K695		Myof	8	233.38	207440000	15	NaN	NaN	NaN	NaN	NaN	NaN	NaN	NaN	NaN	NaN	NaN	NaN	22.4799	NaN	22.0291	NaN	NaN	NaN	22.575	NaN	NaN	NaN	NaN	NaN	NaN	NaN	NaN	NaN	NaN	NaN	NaN	NaN	NaN	NaN	NaN	NaN	NaN	NaN	NaN	NaN	NaN
0.00394984	-0.273743	D3ZUF9;A0A0G2K6D5		Pitrm1	10	108.54	726070000	99	23.2196	23.0874	23.2624	23.4606	24.0073	23.6086	23.3237	23.6728	23.8781	23.3602	23.5138	23.5706	23.1262	23.13	23.1072	NaN	NaN	NaN	NaN	NaN	NaN	23.3425	23.4033	23.325	23.2949	23.3454	23.5637	23.6348	NaN	23.5411	NaN	23.3708	23.4082	23.2157	23.3303	23.5194	23.131	23.3476	23.0896	23.7985	23.5752
0.76266	0.0573905	B2RYP0;A0A0G2K6E0;Q5XIM3;Q80WN4;P62747		Rhoc	2	22.036	694500000	50	23.5491	23.761	23.6886	NaN	NaN	NaN	23.4149	NaN	NaN	23.4077	NaN	23.9097	23.0564	23.4754	23.1653	NaN	NaN	NaN	NaN	NaN	NaN	NaN	NaN	NaN	NaN	23.3047	NaN	NaN	NaN	NaN	NaN	NaN	NaN	NaN	NaN	NaN	NaN	23.2536	23.1951	NaN	NaN
0.619501	0.0398827	A0A0G2K6E8;E9PSJ4;B5DF76		Spag9	8	149.58	288440000	87	21.9655	NaN	22.0995	22.498	22.1144	22.09	22.0074	22.1336	22.3043	22.2164	22.1862	22.3351	22.1979	NaN	22.3665	NaN	NaN	NaN	22.3005	22.2663	22.3039	22.0339	22.0988	21.9619	22.5432	22.3642	22.3058	NaN	NaN	NaN	NaN	NaN	NaN	21.9984	22.1888	21.9393	22.1424	22.2933	22.3052	NaN	22.1145
1	NaN	A0A0G2K6G2;Q7TP48;D3ZGQ3;Q5EB60	Adipocyte plasma membrane-associated protein	Apmap	8	46.446	229570000	21	NaN	NaN	NaN	NaN	NaN	NaN	NaN	NaN	NaN	NaN	NaN	NaN	NaN	NaN	NaN	NaN	NaN	NaN	NaN	NaN	NaN	NaN	NaN	23.3213	NaN	NaN	NaN	NaN	NaN	NaN	NaN	NaN	NaN	NaN	NaN	NaN	NaN	NaN	NaN	NaN	NaN
0.0296925	-0.215322	A0A0G2K6H2;P57113	Maleylacetoacetate isomerase	Gstz1	3	23.862	520270000	38	22.8469	23.0817	22.8324	23.3056	23.3389	23.4576	22.9538	22.975	23.1252	22.9181	23.2395	22.997	NaN	22.5927	22.7695	NaN	NaN	NaN	23.1552	NaN	23.4207	22.9551	22.6287	22.76	22.2972	NaN	NaN	23.2747	NaN	23.4005	23.0468	23.0908	22.9997	23.1043	22.8146	23.1418	NaN	23.0813	22.9666	23.0697	23.3069
0.34587	0.082664	A0A0G2K6I4;Q5XHX3;F1M8I7		Enah	13	62.675	1436100000	271	23.9099	24.3591	24.5588	24.143	24.619	24.5739	24.1249	24.1118	24.054	24.485	24.4459	24.5106	24.5378	24.2815	24.1989	NaN	NaN	NaN	23.9571	24.0589	24.2487	24.1346	24.3124	24.1564	24.1857	24.3363	24.4977	24.2383	23.855	24.2686	24.229	24.3795	24.3859	24.6262	24.76	24.7816	24.5579	24.5751	24.5532	24.2616	24.2176
1	NaN	A0A0G2K6J2;F1LPA4;O08874	Serine/threonine-protein kinase N2	Pkn2	5	98.945	34416000	1	NaN	NaN	NaN	NaN	NaN	NaN	NaN	NaN	NaN	NaN	NaN	NaN	NaN	NaN	NaN	NaN	NaN	NaN	NaN	NaN	NaN	NaN	NaN	NaN	NaN	NaN	NaN	NaN	NaN	NaN	NaN	NaN	NaN	NaN	NaN	20.7037	NaN	NaN	NaN	NaN	NaN
0.933632	-0.0235887	A0A0G2K6J5;B2GV99;Q64119;A0A0G2JWE1;D3ZHA7	Myosin light polypeptide 6	Myl6	23	16.961	435030000000	1474	32.6321	32.618	32.5673	33.0516	33.0427	33.0466	32.4047	32.3357	32.3241	32.4777	32.4285	32.4265	32.6186	32.5972	32.4651	32.59	32.5481	32.3363	32.2521	32.3849	32.3006	32.4359	32.3844	32.4425	32.4032	32.4171	32.4216	33.1988	33.2704	33.2039	32.2528	32.1147	32.2192	32.8979	32.95	32.8291	30.7383	30.7435	30.7561	32.9187	32.828
1	-0.2642	A0A0G2K6N3;D3Z9A4		LOC100233176	2	7.9405	64509000	17	NaN	NaN	21.2846	NaN	NaN	NaN	21.5026	NaN	NaN	NaN	21.2062	21.0413	21.2737	NaN	NaN	NaN	NaN	NaN	NaN	NaN	NaN	NaN	NaN	NaN	NaN	21.1492	NaN	NaN	NaN	NaN	NaN	NaN	NaN	NaN	NaN	NaN	NaN	NaN	NaN	NaN	NaN
1	NaN	A0A0G2K6R8;Q5PQM3;A1L1L8;A0A0G2JVJ5;B3DM88		Ehbp1l1	4	182.51	473720000	32	NaN	NaN	NaN	NaN	NaN	NaN	NaN	NaN	NaN	NaN	NaN	22.4813	NaN	23.2931	NaN	NaN	NaN	NaN	NaN	NaN	NaN	NaN	NaN	NaN	NaN	NaN	NaN	NaN	NaN	NaN	NaN	NaN	NaN	NaN	NaN	NaN	NaN	NaN	NaN	NaN	NaN
0.732495	0.111427	A0A0G2K6S9;Q63862;B2RYD3;A0A0G2JY53	Myosin-11	Myh11	352	228.04	2567600000000	23618	35.0467	35.0716	35.0676	35.3685	35.3742	35.365	34.9476	34.9183	34.9346	35.304	35.3187	35.3209	35.2057	35.2081	35.1927	33.5457	33.5071	33.6051	34.6168	34.6272	34.6301	35.0947	35.1065	35.1199	35.0101	34.996	34.9936	35.5042	35.4859	35.47	34.5178	34.5005	34.5386	35.5331	35.5531	35.5364	33.1481	33.1606	33.1755	35.2961	35.3176
0.37123	0.0406993	F1LQ81;A0A0G2K6U1;Q9QUL6;O88975;O88960	Vesicle-fusing ATPase	Nsf	24	82.629	4506800000	546	25.8287	25.8416	25.7513	26.2302	26.2513	26.2783	25.8911	25.9865	25.9166	25.9888	25.8965	25.8484	25.9095	25.826	25.764	25.4466	25.7845	24.8035	25.8191	25.821	25.9519	25.8435	25.9631	25.9919	26.0476	26.016	26.0595	25.8998	26.0401	26.0711	25.8766	25.6937	25.8093	25.7162	25.7398	25.6313	25.8107	26.0619	25.8624	26.1454	26.1116
1	NaN	D3ZIL9;A0A0G2K6W6	DIS3-like exonuclease 2	Dis3l2	3	98.398	161440000	2	NaN	NaN	NaN	NaN	NaN	NaN	NaN	NaN	NaN	NaN	NaN	NaN	NaN	NaN	NaN	NaN	NaN	NaN	NaN	NaN	21.3441	NaN	NaN	NaN	NaN	NaN	NaN	NaN	NaN	NaN	NaN	NaN	NaN	NaN	NaN	NaN	NaN	NaN	NaN	NaN	NaN
0.494958	0.0552877	A0A0G2K6X6;O08679;A0A0G2JTD8;A0A0G2K7H9;D4A6T9;F1M836;A0A0G2JU56;O08678;Q8VHF0	Serine/threonine-protein kinase MARK2	Mark2	6	82.019	338990000	18	NaN	NaN	22.1131	22.3602	22.0869	NaN	22.647	22.6817	NaN	22.4281	22.5735	22.784	22.4399	22.6093	22.5746	NaN	NaN	NaN	NaN	NaN	NaN	22.627	22.4932	22.5314	22.4239	NaN	NaN	NaN	NaN	NaN	NaN	NaN	NaN	22.3733	NaN	22.5844	22.7989	22.6213	22.7094	NaN	NaN
1	NaN	F1MAG0;A0A0G2K6Y3;Q7TSB6		Dfna5	3	56.875	151760000	5	NaN	NaN	NaN	NaN	NaN	NaN	NaN	NaN	NaN	NaN	NaN	NaN	NaN	NaN	NaN	NaN	NaN	NaN	NaN	NaN	NaN	NaN	NaN	NaN	NaN	NaN	NaN	NaN	NaN	NaN	NaN	NaN	NaN	NaN	NaN	NaN	NaN	NaN	NaN	NaN	NaN
1	NaN	P29288;A0A0G2K6Z6;Q38RQ5	Tartrate-resistant acid phosphatase type 5	Acp5	2	36.726	185880000	6	NaN	NaN	NaN	NaN	NaN	NaN	NaN	NaN	NaN	NaN	NaN	NaN	NaN	NaN	NaN	NaN	NaN	NaN	NaN	NaN	NaN	NaN	NaN	NaN	NaN	NaN	NaN	NaN	NaN	NaN	NaN	NaN	NaN	NaN	NaN	NaN	NaN	NaN	NaN	NaN	NaN
0.114422	0.169542	A0A0G2K714;Q6AYE2	Endophilin-B1	Sh3glb1	6	43.078	1147300000	48	24.1683	24.0796	23.5902	23.1368	22.7538	NaN	23.7009	24.0988	23.7927	23.899	24.3629	24.3302	23.8717	23.9869	24.4731	24.1715	NaN	NaN	24.1095	23.8573	23.2483	23.994	23.8249	23.8536	24.1992	24.1521	24.6944	24.7243	24.1911	NaN	24.1668	24.1494	23.917	24.2542	24.3415	23.7209	23.8708	24.3403	23.6904	24.0493	24.0191
0.911972	-0.00519803	A0A0G2K719;D3ZN21;F1LQD1;H9BFH0;C7E3F3;Q64060		Ddx3y	25	73.145	8059800000	602	26.6584	26.6468	26.5507	26.5617	26.6757	26.4709	26.7029	26.7792	26.6413	26.674	26.9282	26.8747	26.7007	26.6371	26.676	26.3108	26.3632	26.191	26.7412	26.6691	26.7609	26.679	26.7821	26.6584	26.95	27.0217	27.0161	26.9295	26.9369	26.8306	26.8035	26.7196	26.7136	26.8546	26.8583	26.8919	26.928	26.7905	26.8461	26.8472	26.8145
0.677415	0.0528501	A0A0G2K724;Q4G009	Malignant T-cell-amplified sequence 1	Mcts1	4	20.555	626110000	76	22.9868	23.3441	22.9573	NaN	23.403	NaN	23.233	23.4538	23.0844	23.1139	22.9714	22.8055	23.3081	23.0896	22.938	NaN	NaN	NaN	23.7346	NaN	23.3022	23.1263	22.9862	22.8939	23.2674	23.1424	23.1032	24.0911	NaN	23.0478	23.337	23.3207	NaN	23.1691	23.2406	23.0746	23.2747	23.1644	23.1874	23.4955	23.4779
1	NaN	A0A0G2K736;F1MA31;B3STT9		Kdm1a	6	93.969	141610000	3	NaN	NaN	NaN	NaN	NaN	NaN	NaN	NaN	NaN	NaN	NaN	NaN	NaN	NaN	NaN	NaN	NaN	NaN	NaN	NaN	NaN	NaN	NaN	NaN	NaN	NaN	NaN	NaN	NaN	NaN	NaN	NaN	NaN	NaN	NaN	NaN	NaN	NaN	NaN	NaN	NaN
0.217963	-0.0736345	A0A0G2K737;Q920J4	Thioredoxin-like protein 1	Txnl1	15	32.7	4642100000	430	25.8145	25.823	25.8427	26.2299	26.1355	26.1499	26.0192	25.9953	25.944	26.0747	26.0657	26.0814	25.8676	25.9239	25.912	25.2539	25.6303	25.2126	26.2989	26.1993	26.2545	26.0131	25.9743	26.073	26.1344	26.1182	26.2633	25.678	25.7897	25.8524	26.0513	26.2834	26.175	25.9641	25.9752	25.9576	26.1376	26.1408	26.1388	25.9448	26.0154
0.4621	-0.0732722	A0A0G2K751;Q642C0	DnaJ homolog subfamily C member 8	Dnajc8	5	32.703	608190000	80	23.2038	22.9626	23.2666	23.2148	23.4457	23.4262	23.2333	23.2495	23.1943	22.9326	23.3301	23.5888	23.1186	23.3817	23.2062	NaN	NaN	NaN	23.2167	23.2939	NaN	22.8733	22.6352	22.891	23.4925	23.1338	23.4495	23.543	23.5482	23.4944	22.9029	NaN	22.9381	23.1734	23.1892	23.047	23.1031	22.6555	23.0307	NaN	23.5813
1	NaN	A0A0G2K754			2	107.94	187960000	69	NaN	NaN	NaN	NaN	NaN	NaN	NaN	NaN	NaN	NaN	NaN	NaN	NaN	NaN	NaN	NaN	NaN	NaN	NaN	NaN	22.9691	NaN	NaN	NaN	NaN	NaN	NaN	NaN	NaN	NaN	NaN	NaN	NaN	NaN	NaN	NaN	NaN	NaN	NaN	NaN	NaN
0.399123	-0.0593043	Q5XI18;A0A0G2K756;G3V6E4;Q7TNY6	Golgi resident protein GCP60	Acbd3	13	60.247	1248000000	215	23.935	23.7716	23.9688	24.1868	24.0327	24.237	23.8871	24.0475	23.8532	24.2928	24.14	24.2775	24.1451	24.1015	24.2315	24.0217	24.1406	24.4246	24.54	24.3408	24.4296	24.0554	24.2645	24.0169	24.3735	24.0025	24.058	23.6689	23.4815	23.4773	24.2933	24.0016	24.3	23.7335	23.7894	23.8615	24.1169	24.22	24.1718	24.0349	23.8268
0.0646389	-0.201849	A0A0G2K757;P25235	Dolichyl-diphosphooligosaccharide--protein glycosyltransferase subunit 2	Rpn2	21	69.122	9460900000	579	27.1267	27.1767	27.1718	27.5557	27.6546	27.6564	27.2837	27.2939	27.3446	26.0723	26.1758	25.9458	26.9706	27.0022	26.9937	25.3637	25.4245	26.1783	27.4092	27.4372	27.3187	27.4752	27.4397	27.4626	26.5793	26.6169	26.4991	27.5286	27.4682	27.5717	27.361	27.4116	27.3568	27.2557	27.229	27.3081	26.8424	26.7618	26.7434	27.4492	27.4797
1	NaN	A0A0G2K761;D4A0H4		Cul2	8	86.968	155250000	17	NaN	NaN	NaN	NaN	NaN	NaN	NaN	NaN	NaN	NaN	NaN	NaN	NaN	NaN	22.1249	NaN	NaN	NaN	NaN	NaN	NaN	NaN	NaN	NaN	NaN	NaN	NaN	NaN	NaN	NaN	NaN	NaN	NaN	NaN	NaN	NaN	NaN	NaN	NaN	NaN	NaN
0.0342417	-0.302929	A0A0G2K781;D3ZJW3		Ppfibp1	7	116.1	2614900000	65	24.221	NaN	24.4165	23.5812	NaN	25.2048	24.6177	24.9053	NaN	25.1446	24.8456	24.5707	24.763	24.5265	24.6986	NaN	NaN	23.3731	NaN	24.5054	NaN	NaN	NaN	NaN	NaN	24.5081	24.6991	24.6963	NaN	24.5886	24.7794	24.7162	NaN	NaN	24.9588	NaN	25.0181	NaN	24.8245	24.7621	24.5864
1	NaN	A0A140TAI3;A0A0G2K7B3;G3V9R8	Heterogeneous nuclear ribonucleoprotein C	Hnrnpc	1	32.322	144720000	3	NaN	NaN	NaN	NaN	NaN	NaN	NaN	NaN	NaN	NaN	NaN	NaN	NaN	NaN	NaN	NaN	NaN	NaN	NaN	NaN	NaN	NaN	NaN	NaN	NaN	NaN	NaN	NaN	NaN	NaN	NaN	NaN	NaN	NaN	NaN	NaN	NaN	NaN	NaN	NaN	NaN
1	NaN	D4A6X1;A0A0G2K7B6		Dysf	2	230.97	37656000	1	NaN	NaN	NaN	NaN	NaN	NaN	NaN	NaN	NaN	NaN	NaN	NaN	NaN	NaN	NaN	NaN	NaN	NaN	NaN	NaN	NaN	NaN	NaN	NaN	NaN	NaN	NaN	NaN	NaN	NaN	NaN	NaN	NaN	NaN	NaN	NaN	NaN	NaN	NaN	NaN	NaN
0.571367	-0.0541476	A0A0G2K7C1;Q6MG49	Large proline-rich protein BAG6	Bag6	8	112.88	573200000	110	22.867	22.5503	22.9741	23.1463	23.1319	22.9737	22.8817	23.6222	23.0341	23.0968	23.059	23.2404	22.9737	22.9376	23.1764	NaN	NaN	NaN	NaN	22.9681	22.9978	23.4312	23.1221	23.0559	23.017	23.5502	22.9687	22.7492	22.8672	22.886	NaN	22.9429	NaN	22.979	22.8079	22.8146	22.7239	23.1984	22.6979	23.2089	22.7604
0.640405	-0.0793252	Q642F2;A0A0G2K7C6;Q99ND8;P35815	Protein phosphatase 1B	Ppm1b	6	43.532	715350000	33	23.8776	NaN	24.0825	23.6082	NaN	24.0582	NaN	NaN	NaN	22.5304	23.8195	NaN	23.5538	NaN	NaN	NaN	NaN	NaN	NaN	NaN	NaN	NaN	NaN	NaN	23.6645	23.9625	24.1538	NaN	NaN	23.6665	NaN	NaN	NaN	NaN	NaN	NaN	NaN	NaN	NaN	NaN	24.0913
0.0698653	0.21046	A0A0G2K7D4;Q923J6	Dynein heavy chain 12, axonemal	Dnah12	4	454.61	1260600000	11	24.3437	NaN	NaN	NaN	NaN	NaN	24.2505	NaN	24.4038	NaN	NaN	24.8235	24.5909	24.8868	24.6056	NaN	NaN	NaN	24.4478	24.2178	24.3971	24.4827	24.5051	24.8379	24.578	24.3181	NaN	NaN	NaN	NaN	NaN	NaN	NaN	24.5582	NaN	NaN	NaN	NaN	NaN	NaN	NaN
1	NaN	Q5I0C6;A0A0G2K7D7		Nars2	1	31.728	73820000	1	NaN	NaN	NaN	NaN	NaN	NaN	NaN	NaN	NaN	NaN	NaN	NaN	NaN	NaN	NaN	NaN	NaN	NaN	NaN	NaN	NaN	NaN	NaN	NaN	NaN	NaN	NaN	NaN	NaN	NaN	NaN	NaN	NaN	NaN	NaN	NaN	NaN	NaN	NaN	NaN	NaN
0.311986	-0.0590289	G3V9Z6;A0A0G2K7G7;B0BNF1;A0A0G2JVY6	Septin-8	2008-09-01	9	49.856	1365700000	177	24.2865	24.2113	24.1826	24.6026	24.5246	24.4423	24.3771	24.1732	24.397	24.2028	23.9639	24.1493	24.2967	24.3286	24.2122	24.1844	24.3335	24.4437	24.763	24.3659	24.3842	23.9245	23.8821	24.1219	24.334	24.3968	24.3432	24.3932	24.3483	24.3072	24.3571	24.369	24.3893	24.0777	24.2996	24.1807	24.3863	24.4815	24.5487	24.2733	24.2924
1	NaN	A0A0G2K7I1			1	10.145	28422000	15	NaN	NaN	NaN	NaN	NaN	NaN	NaN	NaN	NaN	NaN	NaN	NaN	NaN	NaN	NaN	NaN	NaN	NaN	NaN	NaN	NaN	NaN	NaN	NaN	NaN	NaN	NaN	NaN	NaN	NaN	NaN	NaN	NaN	NaN	NaN	NaN	NaN	NaN	NaN	NaN	NaN
0.290708	-0.155678	Q9JM53;A0A0G2K7K2;Q924M6	Apoptosis-inducing factor 1, mitochondrial	Aifm1	22	66.722	2434900000	268	25.1671	24.9881	25.3435	25.8259	25.7421	25.9122	25.4711	25.5507	25.6449	24.6091	24.9142	24.836	25.0888	24.9049	25.0252	25.2194	24.9077	25.1499	25.4034	25.4287	25.3808	25.3133	25.0375	25.4348	24.3716	24.5178	24.495	25.2211	25.0919	25.3285	25.3013	25.4065	25.5154	24.9308	25.0951	25.0017	24.9385	24.9327	24.9846	25.2391	25.1894
1	NaN	D3ZQM7;A0A0G2K7L4		Itpk1	4	46.204	150650000	2	NaN	NaN	NaN	NaN	NaN	NaN	NaN	NaN	NaN	NaN	NaN	NaN	NaN	NaN	NaN	NaN	NaN	NaN	NaN	NaN	NaN	NaN	22.094	NaN	NaN	NaN	NaN	NaN	NaN	NaN	NaN	NaN	NaN	NaN	NaN	NaN	NaN	NaN	NaN	NaN	NaN
0.0535701	-0.305499	F1LMS5;A0A0G2K7L8;P49744	Thrombospondin-4	Thbs4	10	105.83	528620000	102	22.3978	22.0359	22.3271	23.6882	23.1994	23.3757	23.1213	22.8269	22.5731	23.1519	23.2743	22.9968	NaN	22.9195	22.7628	23.1373	NaN	NaN	NaN	NaN	NaN	22.5852	22.4764	22.3789	23.2536	NaN	23.1986	22.5399	23.0771	22.981	NaN	NaN	NaN	23.2902	23.1273	23.0563	22.7524	22.6016	23.0578	22.744	23.0187
1	NaN	Q5XFX7;A0A0G2K7M2		Rad23a	2	38.067	464450000	23	NaN	NaN	NaN	NaN	NaN	NaN	NaN	NaN	NaN	NaN	NaN	NaN	NaN	NaN	NaN	NaN	NaN	NaN	NaN	NaN	NaN	NaN	NaN	NaN	NaN	NaN	NaN	NaN	NaN	NaN	NaN	NaN	NaN	NaN	NaN	NaN	NaN	NaN	NaN	NaN	NaN
0.393227	-0.0482568	A0A0G2K7Q7;P35559	Insulin-degrading enzyme	Ide	18	113.16	1939600000	90	24.4801	24.6676	24.3669	25.1082	25.2486	25.4331	24.6037	24.592	24.6437	24.9107	24.6378	24.3806	24.4754	24.4532	24.7394	NaN	NaN	NaN	25.0667	24.6171	24.841	24.5251	24.4854	24.8613	24.831	24.6203	24.7317	24.5388	24.8739	24.9485	24.7269	24.4883	24.6785	24.7372	24.6042	24.9858	24.7199	24.6136	24.8165	24.8052	25.4713
0.376588	0.0556583	A0A0G2K7T2;O35826	Bifunctional UDP-N-acetylglucosamine 2-epimerase/N-acetylmannosamine kinase;UDP-N-acetylglucosamine 2-epimerase (hydrolyzing);N-acetylmannosamine kinase	Gne	37	82.911	17015000000	1246	27.8579	27.7867	27.8752	28.0732	28.1047	28.1454	27.7987	27.7784	27.8192	27.8899	27.9464	27.9569	28.0483	28.0306	28.0137	27.61	27.6401	27.7831	28.1246	28.0929	28.1485	28.0522	28.1123	28.0973	27.7188	27.7364	27.702	27.6418	27.6759	27.7077	28.0275	28.073	27.9979	27.8539	27.8446	27.8053	28.0157	28.007	27.9734	27.9464	27.8135
1	NaN	A0A0G2K7T5;P20651;E2CWF1;Q6AYJ0;E2CWF0;E2CWF2	Serine/threonine-protein phosphatase 2B catalytic subunit beta isoform;Serine/threonine-protein phosphatase	Ppp3cb;Ppp3cc	1	56.397	142660000	43	NaN	NaN	NaN	NaN	NaN	NaN	NaN	NaN	NaN	NaN	NaN	NaN	NaN	NaN	NaN	NaN	NaN	NaN	NaN	NaN	NaN	NaN	NaN	NaN	NaN	NaN	NaN	NaN	NaN	NaN	NaN	NaN	NaN	NaN	NaN	NaN	NaN	NaN	NaN	NaN	NaN
0.358288	-0.0730613	F1LS02;A0A0G2K7T6;P37199	Nuclear pore complex protein Nup155	Nup155	11	154.86	788770000	127	23.1425	23.2542	23.6969	23.5908	23.3973	23.4276	23.3487	23.4108	23.5619	23.5252	23.5539	23.7847	23.2434	23.3708	23.6431	NaN	NaN	NaN	23.9031	23.7849	23.3437	23.4178	23.5152	23.3431	23.6919	23.546	23.5142	22.7601	23.3288	23.7705	23.4536	23.2089	23.0883	23.7014	23.2002	23.2608	23.3828	23.6582	23.5691	23.4752	23.7207
0.68053	0.0318056	A0A0G2K7W7;P18265	Glycogen synthase kinase-3 alpha	Gsk3a	7	50.796	440900000	79	22.3491	22.5748	22.9127	NaN	NaN	NaN	22.7426	22.6655	22.7035	22.7451	22.53	22.6765	22.4475	22.4421	22.5105	NaN	23.2744	NaN	22.8215	22.5939	NaN	22.6718	22.3565	22.685	23.1497	22.8585	22.9076	22.7113	22.6321	22.5063	NaN	NaN	22.5208	22.5478	22.5361	22.4098	22.7398	22.9345	22.8104	22.7456	22.5517
0.00270833	0.228023	A0A0G2K7W8;F1M9G8;Q8K3P7	Histidine triad nucleotide-binding protein 3	Hint3	5	14.317	193760000	77	21.9387	NaN	22.0011	NaN	NaN	NaN	21.5923	22.0352	21.7316	21.8043	21.848	NaN	21.918	21.836	22.1812	NaN	NaN	NaN	21.5058	21.4978	21.7594	NaN	22.1095	21.7808	21.752	21.9966	21.9371	NaN	NaN	NaN	NaN	NaN	NaN	21.5442	21.7963	22.0041	22.1623	21.9484	22.0081	NaN	NaN
1	NaN	A0A0G2K7X7;Q9ERF0			4	93.664	76616000	26	NaN	NaN	NaN	NaN	NaN	NaN	NaN	NaN	NaN	NaN	NaN	NaN	NaN	NaN	NaN	NaN	NaN	NaN	NaN	NaN	NaN	NaN	NaN	NaN	NaN	NaN	NaN	NaN	NaN	NaN	NaN	NaN	NaN	NaN	NaN	NaN	NaN	NaN	NaN	NaN	NaN
1	NaN	A0A0G2K7Y0;Q63135;O35520;Q9QYQ8	Complement component receptor 1-like protein	Cr1l	4	68.662	426220000	35	NaN	NaN	NaN	23.5058	NaN	NaN	NaN	23.5031	NaN	23.2005	23.4427	NaN	NaN	NaN	NaN	NaN	NaN	NaN	NaN	NaN	NaN	NaN	NaN	NaN	NaN	NaN	NaN	23.3736	NaN	NaN	NaN	NaN	NaN	NaN	NaN	NaN	NaN	NaN	NaN	NaN	NaN
1	NaN	A0A0G2K828			2	13.222	55161000	1	NaN	NaN	NaN	NaN	NaN	NaN	22.0333	NaN	NaN	NaN	NaN	NaN	NaN	NaN	NaN	NaN	NaN	NaN	NaN	NaN	NaN	NaN	NaN	NaN	NaN	NaN	NaN	NaN	NaN	NaN	NaN	NaN	NaN	NaN	NaN	NaN	NaN	NaN	NaN	NaN	NaN
0.587152	0.0715024	A0A0G2K845;Q8K3R4		Adipoq	3	23.466	1380700000	157	24.1305	24.2474	24.3147	23.8273	23.7423	23.8074	24.557	24.4771	24.4316	23.3109	23.3884	23.6243	24.2266	24.2287	24.0901	NaN	NaN	NaN	24.0251	24.0071	24.0437	24.0738	24.1624	24.1812	24.3627	24.2624	24.3058	24.5734	24.4585	24.4553	23.4598	23.4116	23.5713	24.1444	24.1707	23.8952	24.2721	24.1593	23.9566	24.4024	24.3588
0.147092	0.178453	A0A0G2K850;B1WC50;A0A140UHY3;Q4KM41		Ewsr1	8	67.94	1316500000	179	24.1697	23.7611	23.8741	23.8482	24.2171	24.0004	24.2241	24.1316	23.7692	24.5062	24.5383	24.3621	24.2544	24.1033	24.3349	NaN	NaN	NaN	NaN	NaN	NaN	24.1733	24.158	24.225	24.4533	24.2125	24.1972	23.5258	23.4756	23.9442	23.7422	23.6472	23.3823	23.9796	24.1252	24.2037	24.037	24.4734	24.4017	24.1029	24.5353
1	NaN	A0A0G2K862			2	203.64	311570000	10	NaN	NaN	NaN	NaN	NaN	NaN	NaN	NaN	NaN	NaN	NaN	NaN	NaN	NaN	NaN	NaN	NaN	NaN	NaN	NaN	NaN	NaN	NaN	NaN	NaN	NaN	NaN	NaN	NaN	NaN	NaN	NaN	NaN	NaN	NaN	NaN	NaN	NaN	NaN	NaN	NaN
0.650779	0.0319143	A0A0G2K876;F8WFW5;Q01062	cGMP-dependent 3,5-cyclic phosphodiesterase	Pde2a	16	103.27	1393600000	191	24.2307	24.5437	24.5781	24.5467	24.3684	24.3754	24.3206	24.1737	24.3973	23.7763	23.9146	23.94	24.3291	24.2942	23.9969	NaN	NaN	NaN	24.4417	24.2691	24.5614	24.4252	24.1887	24.3802	24.1176	24.0956	24.3838	24.4429	24.6263	24.6144	24.044	24.5722	24.1368	24.1769	24.2792	24.0865	24.3576	24.3014	24.1963	24.8689	24.6814
0.747096	-0.267132	A0A0G2K888;F1LMB9;O54921;A0A0G2K1K8	Exocyst complex component 2	Exoc2	4	101.92	221260000	8	NaN	NaN	NaN	NaN	NaN	NaN	NaN	NaN	NaN	NaN	NaN	NaN	NaN	NaN	NaN	NaN	NaN	NaN	NaN	NaN	NaN	NaN	NaN	NaN	NaN	NaN	NaN	NaN	NaN	NaN	NaN	NaN	NaN	NaN	NaN	NaN	NaN	NaN	NaN	NaN	NaN
0.209444	0.084034	A0A0G2K890;P31977	Ezrin	Ezr	38	69.287	14325000000	841	27.6498	27.6441	27.6581	27.9672	27.6788	27.9354	27.5469	27.4935	27.5338	27.8822	27.8529	27.8718	27.6586	27.5394	27.6495	28.3608	28.0454	28.2577	27.5583	27.6697	27.7083	27.5167	27.4743	27.4773	27.4052	27.3888	27.4036	27.7108	27.7206	27.7804	27.8506	27.8047	27.8779	27.5151	27.71	27.5905	27.9073	27.896	27.7622	27.2334	27.3864
1	NaN	A0A0G2K8A9			1	23.785	20643000	0	NaN	NaN	NaN	NaN	NaN	NaN	NaN	NaN	NaN	NaN	NaN	NaN	NaN	NaN	NaN	NaN	NaN	NaN	NaN	NaN	NaN	NaN	NaN	NaN	NaN	NaN	NaN	NaN	NaN	NaN	NaN	NaN	NaN	NaN	NaN	NaN	NaN	NaN	NaN	NaN	NaN
0.716029	0.0303509	A0A0G2K8H0;Q5M9G3	Caprin-1	Caprin1	10	79.632	3617100000	384	25.7261	25.5988	25.6202	25.9405	25.8847	25.7343	25.7476	25.9057	25.6555	25.6023	25.7918	25.6592	25.5706	25.6057	25.6679	NaN	25.0359	24.9989	25.5366	25.2632	25.6427	25.4031	25.4256	25.4032	25.7529	25.7867	25.8623	25.7115	25.733	25.4976	25.2665	24.992	25.5103	25.3264	25.3891	25.4109	25.536	25.5888	25.339	25.9469	25.8866
1	-0.128249	A0A0H2UHL6;A0A0G2K8H6;P00786	Pro-cathepsin H;Cathepsin H mini chain;Cathepsin H;Cathepsin H heavy chain;Cathepsin H light chain	Ctsh	3	32.967	792110000	33	NaN	23.8473	NaN	NaN	NaN	NaN	NaN	NaN	NaN	NaN	NaN	23.718	NaN	NaN	NaN	NaN	NaN	NaN	NaN	NaN	NaN	NaN	NaN	NaN	NaN	NaN	NaN	NaN	NaN	NaN	NaN	NaN	NaN	NaN	NaN	NaN	NaN	NaN	NaN	NaN	NaN
1	NaN	A0A0G2K8I0			1	10.686	80055000	8	NaN	NaN	NaN	NaN	NaN	NaN	NaN	NaN	NaN	NaN	NaN	NaN	NaN	NaN	NaN	NaN	NaN	NaN	NaN	NaN	NaN	NaN	NaN	NaN	NaN	NaN	NaN	NaN	NaN	NaN	NaN	NaN	NaN	NaN	NaN	NaN	NaN	NaN	NaN	NaN	NaN
1	NaN	A0A0G2K8K3;Q64268	Heparin cofactor 2	Serpind1	1	58.023	13413000	1	NaN	NaN	NaN	NaN	NaN	NaN	NaN	NaN	NaN	NaN	NaN	NaN	NaN	NaN	NaN	NaN	NaN	NaN	NaN	NaN	NaN	NaN	NaN	NaN	NaN	NaN	NaN	NaN	NaN	NaN	NaN	NaN	NaN	NaN	NaN	NaN	NaN	NaN	NaN	NaN	NaN
0.341102	-0.0308746	A0A0G2K8K9;P84586;D4AE41;A0A0A0MXW9	RNA-binding motif protein, X chromosome retrogene-like;RNA-binding motif protein, X chromosome retrogene-like, N-terminally processed;RNA binding motif protein, X-linked-like-1	Rbmxrtl;Rbmxl1	12	42.298	3616600000	320	25.5904	25.4943	25.5684	25.0288	25.0336	25.045	25.6213	25.6838	25.4981	25.7488	25.8414	25.8315	25.5568	25.4918	25.6308	26.7844	26.7233	26.8661	25.6554	25.5428	25.6715	25.4982	25.5772	25.5839	25.6032	25.631	25.4753	25.0737	24.9745	25.0552	25.5558	25.7722	25.649	25.5649	25.6551	25.606	25.8188	25.6642	25.578	25.2321	25.2548
1	NaN	A0A0G2K8L9;Q6TXG8		Mrps28	2	20.578	147570000	4	NaN	NaN	NaN	NaN	NaN	NaN	NaN	NaN	NaN	NaN	NaN	NaN	NaN	NaN	NaN	NaN	NaN	NaN	NaN	NaN	NaN	NaN	NaN	NaN	NaN	NaN	NaN	NaN	NaN	NaN	NaN	NaN	NaN	NaN	NaN	NaN	NaN	NaN	NaN	NaN	NaN
1	NaN	A0A0G2K8M3;D3Z8G7		Tjp3	4	99.199	39909000	6	NaN	NaN	NaN	NaN	NaN	NaN	NaN	NaN	NaN	NaN	21.6851	NaN	NaN	NaN	NaN	NaN	NaN	NaN	NaN	NaN	NaN	NaN	NaN	NaN	NaN	NaN	NaN	NaN	NaN	NaN	NaN	NaN	NaN	NaN	NaN	NaN	NaN	NaN	NaN	NaN	NaN
0.396722	0.0602645	D3ZC34;A0A0G2K8N6		Ankmy2	2	43.899	343890000	32	22.6712	NaN	22.6255	NaN	NaN	NaN	NaN	22.5198	NaN	22.5013	22.4037	22.38	22.5626	22.8292	22.921	NaN	NaN	NaN	22.9239	NaN	22.8005	NaN	22.5288	22.4573	22.6882	22.6086	22.9452	22.2026	NaN	NaN	NaN	NaN	NaN	23.0017	22.7228	22.6293	22.6484	22.7928	22.6832	NaN	22.62
0.256846	-0.152508	A0A0G2K8N9			10	104.85	569230000	132	23.0103	23.1212	23.2086	23.7023	23.4011	23.6237	23.7213	23.0693	23.0693	NaN	22.3461	NaN	23.1814	22.7765	23.0516	NaN	NaN	NaN	NaN	23.2494	NaN	23.443	22.6472	23.0022	23.304	22.9693	23.3653	22.4051	22.681	22.9969	NaN	NaN	NaN	22.6386	NaN	22.7937	21.9743	NaN	23.097	23.096	22.9843
0.0161628	0.267835	A0A0G2K8Q1			1	11.029	209780000	68	22.2426	22.5202	22.2109	NaN	NaN	NaN	22.1491	22.0438	NaN	22.0725	NaN	22.3744	21.9751	22.3743	22.3153	NaN	NaN	NaN	NaN	NaN	NaN	21.5188	21.5158	21.7001	22.4509	22.0471	22.11	21.6379	NaN	22.0847	22.2721	NaN	NaN	21.4835	NaN	NaN	NaN	22.4716	22.2151	NaN	NaN
0.430183	0.100536	Q6MG66;A0A0G2K8Q7;A0A0G2KAB8		Lsm2	3	14.779	1131900000	108	23.8541	23.6883	23.8047	24.657	24.7992	24.8076	24.0963	23.9631	23.6798	23.9429	24.0481	24.1442	23.9392	23.891	23.8317	NaN	NaN	NaN	23.5411	23.2819	23.3113	24.3298	23.7621	24.3082	23.9879	24.3074	24.2439	24.5068	24.4823	24.2807	24.152	23.5384	23.5746	24.1065	24.0349	23.7856	23.5024	23.7109	24.4203	23.9668	23.8974
0.0370624	0.275361	A0A0G2K8Q8;B2RYX1		Uqcr10	2	7.099	1771400000	116	24.4155	24.6104	24.4789	25.5641	25.7482	25.8819	24.9406	24.8175	24.7604	25.4175	25.0769	25.2691	24.6	24.4031	24.3918	NaN	NaN	NaN	23.9389	24.2129	24.1319	25.1268	25.0245	24.9921	24.3029	24.2302	24.6793	24.8959	24.8701	24.8463	23.8456	23.6785	23.7257	24.5761	24.6549	24.5912	24.0545	24.1557	24.2652	24.6613	24.6529
0.447228	-0.14598	G3V743;A0A0G2K8S6;O88941	Mannosyl-oligosaccharide glucosidase	Mogs	8	81.025	486620000	108	22.5258	22.5833	22.5113	23.4404	23.4473	23.6433	22.8585	22.9542	23.0485	21.9148	NaN	NaN	22.5114	22.3329	22.387	NaN	23.6652	23.4676	23.5066	23.1921	23.287	22.9974	23.1832	22.9569	22.1722	22.1321	22.2846	23.3704	23.0762	22.8275	23.5087	23.0909	23.2044	22.7232	22.5714	22.7048	22.9552	22.69	22.1046	22.7737	22.9092
0.616387	-0.0355843	A0A0G2K8T0;Q6P7S1	Acid ceramidase	Asah1	9	48.282	2541900000	122	25.2243	25.6655	25.2728	25.2456	25.4171	25.4511	25.2673	25.6137	25.5191	25.2496	25.0831	25.0449	24.9885	25.1769	24.8839	NaN	NaN	NaN	25.2934	25.2485	25.4076	24.9053	24.9604	24.9465	25.5409	25.2526	25.1561	25.8117	26.1011	25.5215	25.1493	25.2997	25.0401	24.895	24.6327	24.8084	25.3819	24.8877	25.1697	25.4436	25.0917
0.341013	-0.109283	R9PXU6;A0A0G2K8V2;P85972	Vinculin	Vcl	100	116.57	178370000000	4226	31.0192	31.0072	31.0237	31.6965	31.6699	31.6619	31.4544	31.4515	31.4254	30.9795	30.8908	30.92	31.234	31.2672	31.2601	30.2451	30.0352	30.1528	30.9695	30.8937	30.9093	30.9357	30.8617	30.8948	31.4853	31.6139	31.5271	31.3704	31.3126	31.3385	30.8522	30.7803	30.8536	31.2571	31.186	31.1971	30.9852	31.0761	31.0248	31.2046	31.2612
0.705737	0.0457403	A0A0G2K8V3;F1M0V4;F1LZ00		Thoc2	5	185.06	306260000	48	22.4063	NaN	NaN	22.8637	22.8639	22.4923	NaN	22.8308	22.1896	22.4431	22.2029	22.3047	22.132	22.3455	22.178	NaN	NaN	NaN	22.646	NaN	NaN	NaN	22.5657	22.3015	22.8984	22.4428	22.5985	NaN	NaN	NaN	NaN	NaN	22.5844	22.2341	NaN	22.2938	22.5658	22.6997	22.6345	22.5863	22.6771
0.612949	0.0203559	G3V6S0;Q6XD99;A0A0G2K8W9;A0A0G2JZY6;Q5D002;Q99MI4;Q8VI65		Sptbn1	124	273.31	45589000000	3556	29.2036	29.2716	29.2907	29.512	29.4577	29.4074	29.3698	29.3855	29.3601	29.3539	29.3124	29.3727	29.3346	29.3372	29.3722	28.1311	28.2206	28.1488	29.2079	29.2543	29.2576	29.2286	29.2405	29.2629	29.3285	29.3129	29.2912	29.3085	29.3471	29.2814	29.0665	29.1442	29.1029	29.1548	29.0937	29.1516	29.2727	29.3193	29.2497	29.2885	29.2962
0.0171718	-0.2784	A0A0G2K8Y5;Q9JMG8;Q9JHU0	Dihydropyrimidinase-related protein 5	Dpysl5	2	52.89	135700000	19	21.6378	21.5176	21.5194	NaN	NaN	21.9222	21.9392	NaN	NaN	NaN	NaN	NaN	21.5993	21.5049	NaN	NaN	NaN	NaN	NaN	NaN	NaN	NaN	NaN	NaN	NaN	NaN	NaN	NaN	21.7694	NaN	NaN	NaN	NaN	NaN	NaN	NaN	NaN	NaN	NaN	22.567	22.7659
0.902263	-0.0114489	A0A0G2K8Z9;Q70AM4;A0A0G2K6V6;D3ZFN9	Kinesin-like protein	Kif13b	21	204.85	1342500000	257	24.1598	23.9893	24.1046	24.052	24.1999	24.1585	24.0405	23.7825	24.0431	24.4287	24.2827	24.1496	24.208	24.0407	24.1538	23.9232	24.7057	24.6558	24.5436	24.857	24.553	24.382	24.277	24.1948	24.3644	24.2177	24.3784	23.9445	24.2555	23.7633	24.4203	24.397	24.6031	24.1152	24.2798	24.1653	24.367	24.1522	24.2395	24.1672	24.1821
1	NaN	A0A0G2K904;Q568Z5		Sltm	4	117.17	208940000	8	NaN	NaN	NaN	NaN	NaN	NaN	NaN	21.9861	21.8085	22.5008	22.1787	22.0851	NaN	NaN	NaN	NaN	NaN	NaN	21.802	NaN	NaN	NaN	21.9424	NaN	NaN	NaN	NaN	NaN	NaN	21.3277	NaN	NaN	NaN	22.2123	22.341	NaN	NaN	NaN	NaN	NaN	NaN
1	NaN	A0A0G2K916;E9PTK9;Q5XI12		Ankhd1	5	276.83	918260000	34	NaN	NaN	NaN	NaN	NaN	NaN	NaN	NaN	NaN	NaN	NaN	NaN	NaN	NaN	NaN	NaN	NaN	NaN	NaN	NaN	NaN	NaN	NaN	NaN	NaN	NaN	NaN	NaN	NaN	NaN	NaN	NaN	NaN	24.0906	NaN	NaN	NaN	NaN	NaN	NaN	NaN
0.0126583	-0.102907	A0A0G2K930;P09527	Ras-related protein Rab-7a	Rab7a	13	21.203	7255400000	469	26.6539	26.7371	26.6418	27.0411	26.9141	27.0217	26.8611	26.9731	26.7827	26.4435	26.4332	26.3764	26.6431	26.7595	26.6741	26.1599	25.333	25.4953	26.8772	26.8184	26.7647	26.7283	26.723	26.7676	26.7856	26.5674	26.7268	26.7083	26.7201	26.7158	26.6271	26.6443	26.6098	26.4755	26.5873	26.4664	26.5424	26.6551	26.6296	26.8913	26.8839
0.397959	0.173288	B2RYI3;G3V8U3;A0A0G2K948		Dpf2	6	44.084	106030000	49	NaN	NaN	NaN	NaN	NaN	NaN	NaN	NaN	21.0392	NaN	21.4996	NaN	NaN	NaN	NaN	NaN	NaN	NaN	NaN	NaN	NaN	NaN	NaN	NaN	NaN	NaN	21.5499	NaN	NaN	NaN	NaN	NaN	NaN	NaN	NaN	NaN	NaN	21.5657	NaN	NaN	NaN
1	-0.398296	B5DFH4;A0A0G2K950		Papss2	9	69.411	571930000	18	NaN	NaN	NaN	NaN	NaN	NaN	NaN	NaN	NaN	22.6803	NaN	NaN	NaN	NaN	NaN	23.5643	23.2296	24.1139	NaN	NaN	23.0447	22.53	22.6278	NaN	NaN	NaN	NaN	22.5486	NaN	NaN	23.4061	NaN	22.7409	22.3901	NaN	NaN	NaN	22.7371	NaN	NaN	NaN
0.41181	0.0505549	A0A140TAB6;A0A0G2K977;Q62839	Golgin subfamily A member 2	Golga2	11	111.45	740550000	175	23.1271	23.3255	23.1156	23.0514	23.3468	23.2373	23.1766	23.2454	23.1	23.2593	23.4065	23.2051	23.3979	23.3127	23.327	23.5201	24.2813	24.1388	23.4689	23.2195	23.114	23.1101	23.3975	23.3097	23.4544	23.3724	23.4389	22.8948	23.1313	23.1067	23.2506	23.4456	23.3376	23.3207	22.9933	22.7784	23.4975	22.9612	23.4735	23.2278	23.2336
0.104789	0.175615	Q5U1Y3;A0A0G2K995		Fblim1	5	38.227	431870000	127	22.6169	22.5626	NaN	NaN	NaN	NaN	NaN	22.5195	22.4305	NaN	NaN	22.6631	NaN	22.6157	NaN	23.7234	22.5498	22.6556	22.1533	NaN	22.4677	22.8825	22.7652	22.5591	22.9891	22.9387	23.0771	NaN	NaN	22.6264	NaN	NaN	NaN	22.7082	22.5736	22.8958	22.5795	22.9529	22.5657	NaN	22.7948
0.99988	-1.02997e-05	A0A0G2K9A2;P85970;A0A0G2K905;A0A0G2K2J1;A0A0G2K1V8	Actin-related protein 2/3 complex subunit 2	Arpc2	24	34.347	13192000000	600	27.519	27.4289	27.5176	27.4946	27.4994	27.5702	27.6977	27.5603	27.6025	27.5359	27.6372	27.5535	27.3914	27.4714	27.4407	26.6866	26.6294	26.9263	27.5211	27.4632	27.4731	27.586	27.6172	27.5495	27.4863	27.648	27.6803	27.2656	27.2177	27.2374	27.219	27.0672	27.1532	27.5034	27.5317	27.4748	27.6594	27.6216	27.5801	27.4205	27.3916
1	-0.00376892	A0A0G2K9B4;D4A4B1		Mrpl15	5	33.652	79548000	14	NaN	NaN	NaN	NaN	NaN	NaN	NaN	NaN	NaN	20.9746	21.0385	20.817	NaN	NaN	NaN	NaN	NaN	NaN	NaN	NaN	NaN	NaN	20.8541	21.2382	NaN	NaN	NaN	NaN	NaN	NaN	NaN	20.9545	NaN	NaN	NaN	20.8657	NaN	20.9507	NaN	NaN	20.8545
0.867634	-0.0152405	A0A0G2K9C1;A0A0G2KAP8;E9PU44;Q56A18	SWI/SNF-related matrix-associated actin-dependent regulator of chromatin subfamily E member 1	Smarce1	5	35.236	461860000	76	22.5239	22.5819	22.5822	23.017	23.056	23.0352	22.7634	NaN	22.5471	22.8151	22.8359	22.5805	22.8068	22.6154	22.6214	NaN	NaN	NaN	22.9944	23.2073	22.679	22.9026	22.7161	22.8312	22.7718	23.164	22.9511	22.5433	22.3377	22.6685	22.892	22.8209	NaN	22.3746	22.7681	22.4465	22.7868	22.6862	22.3056	22.9916	22.8167
1	NaN	A0A0G2K9C4;D4A6P3;A0MZ67	Shootin-1	RGD1311558	3	69.07	88070000	6	NaN	NaN	NaN	NaN	NaN	NaN	NaN	NaN	NaN	NaN	NaN	NaN	NaN	NaN	NaN	NaN	NaN	NaN	NaN	NaN	NaN	NaN	NaN	NaN	NaN	NaN	NaN	NaN	NaN	NaN	NaN	NaN	NaN	NaN	NaN	NaN	NaN	NaN	NaN	NaN	NaN
1	NaN	D3ZJU5;A0A0G2K9D6		Smarcc1	1	120.5	67895000	16	NaN	NaN	NaN	NaN	NaN	NaN	NaN	NaN	NaN	NaN	NaN	NaN	NaN	NaN	NaN	NaN	NaN	NaN	NaN	NaN	NaN	NaN	NaN	NaN	NaN	NaN	NaN	NaN	NaN	NaN	NaN	NaN	NaN	NaN	NaN	NaN	NaN	NaN	NaN	NaN	NaN
1	NaN	A0A0G2K9F2			2	89.602	18384000	2	NaN	NaN	NaN	NaN	NaN	NaN	NaN	NaN	NaN	NaN	NaN	NaN	NaN	NaN	NaN	NaN	NaN	NaN	NaN	NaN	NaN	NaN	NaN	NaN	NaN	NaN	NaN	NaN	NaN	NaN	NaN	NaN	NaN	NaN	NaN	NaN	NaN	NaN	NaN	19.9621	NaN
1	NaN	A9UMV2;A0A0G2K9G3		Mrps24	2	18.742	88445000	17	NaN	NaN	NaN	NaN	NaN	NaN	NaN	NaN	NaN	NaN	NaN	NaN	NaN	NaN	NaN	NaN	NaN	NaN	NaN	NaN	NaN	NaN	NaN	NaN	NaN	NaN	NaN	NaN	NaN	NaN	NaN	NaN	NaN	NaN	NaN	NaN	NaN	NaN	NaN	NaN	NaN
1	NaN	D3ZB76;B2GV48;A0A0G2K9H9		Dnajb5	2	43.032	78439000	1	NaN	NaN	NaN	NaN	NaN	NaN	NaN	NaN	NaN	NaN	NaN	NaN	NaN	NaN	NaN	NaN	NaN	NaN	NaN	NaN	NaN	NaN	NaN	NaN	NaN	NaN	NaN	NaN	NaN	NaN	NaN	NaN	NaN	NaN	NaN	NaN	NaN	NaN	NaN	NaN	NaN
0.0249739	-0.162821	G3V7K3;A0A0G2K9I6;P13635;F2YBS8	Ceruloplasmin	Cp	20	120.66	4292500000	503	25.8541	25.8363	25.7846	25.5521	25.6244	25.6171	25.7126	25.9015	25.7237	25.6772	25.8662	25.8489	25.6694	25.7984	25.6522	26.6211	26.9867	27.142	25.8384	25.6834	25.7275	25.5502	25.5803	25.585	25.8783	25.9197	25.7994	25.8997	25.9351	25.9656	25.811	25.7138	25.9001	25.5043	25.4545	25.4193	25.8254	26.0661	25.8553	25.8717	26.1866
0.0214401	0.243935	Q5XIL1;E9PTI1;A0A0G2K9J2		Atp6v1h	7	50.859	844240000	74	24.015	23.4139	23.6505	23.6286	23.9849	23.7244	23.6258	23.4913	23.177	23.8065	23.7669	23.8108	24.1528	23.9077	23.8617	NaN	NaN	NaN	NaN	23.0945	23.1253	23.5497	23.7668	23.4811	23.8619	23.8596	24.0512	NaN	22.3889	NaN	23.7788	NaN	NaN	23.856	23.4376	23.7002	23.6313	23.7648	23.8581	23.2847	23.1827
0.00258715	-0.246231	A0A0G2K9L2;D4A6C9		Tom1l2	6	57.946	1197400000	49	23.8876	23.9997	23.7773	24.447	24.5879	NaN	24.1225	24.5042	24.6912	24.0719	24.3932	23.9025	24.1976	24.0559	24.4289	NaN	NaN	NaN	NaN	24.2173	NaN	NaN	23.6108	23.5889	NaN	NaN	24.3944	24.3109	24.4639	24.3464	NaN	24.4067	24.4743	24.1042	24.4024	24.2057	23.938	24.2313	24	24.1843	24.5364
1	NaN	D4A367;Q6P7C9;A0A0G2K9L6		Rbck1	1	29.058	13118000	11	NaN	NaN	NaN	NaN	NaN	NaN	NaN	NaN	NaN	NaN	NaN	NaN	NaN	NaN	NaN	NaN	NaN	NaN	NaN	NaN	NaN	NaN	NaN	NaN	NaN	NaN	NaN	NaN	NaN	NaN	NaN	NaN	NaN	NaN	NaN	NaN	NaN	NaN	NaN	NaN	NaN
1	NaN	A0A0G2K9N0;B1WBX6		Smap2	1	43.194	37572000	8	NaN	NaN	NaN	NaN	NaN	NaN	NaN	NaN	NaN	NaN	NaN	NaN	NaN	NaN	NaN	NaN	NaN	NaN	NaN	NaN	NaN	NaN	NaN	NaN	NaN	NaN	NaN	NaN	NaN	NaN	NaN	NaN	NaN	NaN	NaN	NaN	NaN	NaN	NaN	NaN	NaN
0.0604299	0.234558	A0A0G2K9P4;D4A7V1;Q5PPJ9	Endophilin-B2	Sh3glb2	4	44.448	214810000	30	NaN	NaN	NaN	22.2994	NaN	NaN	NaN	22.0622	22.1096	22.3985	22.4345	NaN	22.2257	NaN	22.3651	NaN	NaN	NaN	NaN	NaN	NaN	22.3626	NaN	NaN	22.6325	NaN	NaN	NaN	NaN	NaN	NaN	NaN	NaN	NaN	NaN	22.1476	22.2512	NaN	NaN	NaN	NaN
0.445554	0.10469	A0A0G2K9P5			10	83.618	1006600000	56	24.0388	23.9816	24.0822	23.6815	23.4764	23.4966	23.9085	23.857	23.6346	23.8184	24.1954	24.0199	24.1958	23.996	24.423	NaN	NaN	NaN	24.184	23.9506	23.2883	NaN	NaN	24.4645	24.2775	24.3238	24.248	24.0483	23.8971	24.0416	23.5828	23.7907	23.5775	23.6126	NaN	24.0429	23.17	23.2788	23.4307	23.8495	24.0258
0.629596	-0.0427876	A0A0G2K9Q1;Q66H74	Golgi phosphoprotein 3-like	Golph3l	14	33.961	2943700000	257	25.0267	25.0125	25.089	25.6942	25.7017	25.5889	25.5501	25.5057	25.4998	25.1638	25.2947	25.2287	25.5038	25.5954	25.421	24.9544	NaN	NaN	25.6033	25.5067	25.245	25.2528	25.1878	25.1195	25.5705	25.4447	25.3738	25.5467	25.6279	25.3896	24.8719	24.7776	25.0352	25.1726	25.2374	25.0411	25.1584	25.1888	25.283	25.4062	25.525
0.0365425	-0.242737	A0A0G2K9Q3;Q6QI44	N-alpha-acetyltransferase 25, NatB auxiliary subunit	Naa25	4	111.79	359830000	18	22.4441	22.3269	22.2155	22.6206	22.474	22.5724	NaN	22.8295	NaN	22.5061	22.72	22.8268	22.8071	22.8969	22.5575	NaN	NaN	NaN	23.1092	23.2765	22.6323	22.446	22.0829	22.0706	22.4922	22.5189	22.6388	NaN	NaN	NaN	22.7145	22.8143	22.9985	22.6722	22.4625	22.5848	22.5687	22.7072	22.2944	NaN	22.6666
1	NaN	A0A0G2K9Q7;Q62625;Q7TQ75	Microtubule-associated proteins 1A/1B light chain 3B	Map1lc3b;LOC100363716	2	14.526	119050000	4	NaN	NaN	NaN	NaN	NaN	NaN	NaN	NaN	NaN	NaN	NaN	NaN	NaN	NaN	NaN	NaN	NaN	NaN	NaN	NaN	NaN	NaN	NaN	NaN	NaN	NaN	NaN	NaN	NaN	NaN	NaN	NaN	NaN	NaN	NaN	NaN	NaN	NaN	NaN	NaN	NaN
1	NaN	F1LP46;A0A0G2K9R3;Q5EBA1	ATP-dependent RNA helicase SUPV3L1, mitochondrial	Supv3l1	3	78.922	28670000	6	NaN	NaN	NaN	NaN	NaN	NaN	NaN	NaN	NaN	NaN	NaN	NaN	NaN	NaN	NaN	NaN	NaN	NaN	NaN	NaN	NaN	NaN	NaN	NaN	NaN	NaN	NaN	NaN	NaN	NaN	NaN	NaN	NaN	NaN	NaN	NaN	NaN	NaN	NaN	NaN	NaN
0.875879	-0.00686582	A0A0G2K9V6;Q5XHY5	Threonine--tRNA ligase, cytoplasmic	Tars	29	83.388	4641800000	482	25.9813	25.9729	25.8972	26.1278	26.1888	26.2499	26.0551	25.9662	26.0218	25.8982	26.0125	25.9542	26.1312	26.0619	26.0553	25.6212	25.5783	25.7769	26.1594	26.0986	26.0557	25.7663	25.8417	25.7841	26.0584	25.9296	26.0299	26.1717	26.0909	26.0222	26.0783	26.0472	25.9578	25.6439	25.6938	25.7496	26.0351	25.9296	26.0801	26.1236	26.1797
0.295835	-0.146092	A0A0G2K9Y7;F1LQJ4;A0A0G2JX75;M0R7R1;F1LLV6;Q63010;Q924V9		LOC501233	3	59.841	221920000	42	NaN	NaN	NaN	NaN	NaN	22.0279	22.7239	22.5249	NaN	21.5341	NaN	NaN	22.2582	22.2088	22.1619	NaN	NaN	NaN	NaN	NaN	NaN	NaN	22.4681	23.2178	22.4946	22.4455	22.491	NaN	NaN	NaN	NaN	22.1171	NaN	NaN	NaN	NaN	NaN	NaN	NaN	NaN	NaN
1	NaN	A0A0G2K9Y9;A0A096MKE5;M0R440		LOC682914	2	57.056	68080000	3	NaN	NaN	NaN	NaN	NaN	NaN	NaN	NaN	NaN	NaN	NaN	NaN	NaN	NaN	NaN	NaN	NaN	NaN	NaN	NaN	NaN	NaN	NaN	NaN	NaN	NaN	NaN	NaN	NaN	NaN	NaN	NaN	NaN	NaN	NaN	NaN	NaN	NaN	NaN	NaN	NaN
0.0377886	-0.197932	A0A0G2KA25;Q4KLL4	Transmembrane 9 superfamily member 4	Tm9sf4	18	74.728	4186900000	294	25.8532	25.7785	25.9571	26.3853	26.4585	26.5935	26.1793	26.1598	26.1441	25.5426	25.432	25.5232	25.8225	25.7958	25.9667	25.1122	NaN	24.6955	26.1281	26.0046	26.2721	26.1662	26.1045	26.1292	25.5725	25.4952	25.4843	26.2	26.2626	26.3816	26.0479	25.7709	26.2058	25.6789	25.7426	25.6464	25.5573	25.5974	25.713	25.9797	26.1377
1	NaN	A0A0G2KA71;Q5FVC5		Pvrl2	2	50.748	25723000	13	NaN	NaN	NaN	NaN	NaN	NaN	NaN	NaN	NaN	NaN	NaN	NaN	NaN	NaN	NaN	NaN	NaN	NaN	NaN	NaN	NaN	NaN	NaN	NaN	NaN	NaN	NaN	NaN	NaN	22.0296	NaN	NaN	NaN	NaN	NaN	NaN	NaN	NaN	NaN	NaN	NaN
0.424704	-0.0632872	Q66H18;A0A0G2KA82		Sypl1	4	28.628	1907000000	162	24.7554	24.8938	24.8281	24.641	24.4476	24.4445	24.8084	25.0695	25.0204	24.3347	24.2871	24.5089	24.8059	24.7821	24.8021	NaN	NaN	NaN	24.7208	24.7447	24.8809	24.9043	25.1311	24.9744	24.7396	24.6168	24.6999	24.5934	24.4972	24.85	24.3416	24.4225	24.6168	24.3969	24.4245	24.8124	24.7636	24.5714	24.6714	24.4461	24.4881
1	NaN	E9PT68;B4F7F2;A0A0G2KA91		Mier1	1	57.943	25199000	5	NaN	NaN	NaN	NaN	NaN	NaN	NaN	NaN	NaN	NaN	NaN	NaN	NaN	NaN	NaN	NaN	NaN	NaN	NaN	NaN	NaN	NaN	NaN	NaN	NaN	NaN	NaN	NaN	NaN	NaN	NaN	NaN	NaN	NaN	NaN	NaN	NaN	NaN	NaN	NaN	NaN
1	NaN	D3ZPC4;A0A0G2KA95;Q05695	Neural cell adhesion molecule L1	L1cam	3	140.39	17531000	1	NaN	NaN	NaN	NaN	NaN	NaN	NaN	NaN	NaN	NaN	NaN	NaN	NaN	NaN	NaN	NaN	NaN	NaN	NaN	NaN	NaN	NaN	NaN	NaN	NaN	NaN	NaN	NaN	NaN	NaN	NaN	NaN	NaN	NaN	NaN	NaN	NaN	NaN	NaN	NaN	NaN
1	NaN	D3ZJZ1;A0A0G2KAB9;Q3MQ06	Autophagy protein 5	Atg5	2	27.704	108380000	30	NaN	NaN	NaN	NaN	NaN	NaN	NaN	NaN	NaN	NaN	NaN	NaN	NaN	NaN	NaN	NaN	NaN	NaN	NaN	NaN	NaN	NaN	NaN	NaN	NaN	NaN	NaN	NaN	NaN	NaN	NaN	NaN	NaN	NaN	NaN	NaN	NaN	NaN	NaN	NaN	NaN
0.281918	-0.11289	A0A0G2KAE1;Q5PQM7			19	38.962	4297900000	438	25.4237	25.4889	25.6744	26.4152	26.2685	26.2501	25.6475	25.7113	25.7391	25.7941	25.8423	25.7554	25.5552	25.5578	25.521	25.9423	26.1059	26.3349	25.3884	25.4486	25.3239	25.5645	25.4737	25.5504	25.4809	25.5298	25.6387	26.125	25.9474	25.8529	25.2314	25.1033	25.1739	25.7666	25.8989	25.6784	25.5486	25.7069	25.5574	26.0683	25.9694
0.0547337	-0.228606	A0A0G2KAI8			7	40.557	517190000	33	22.9986	22.9975	22.8659	23.4751	23.2338	23.0555	22.902	23.0345	NaN	22.684	22.8577	22.7194	22.8262	22.6961	23.0878	23.3113	NaN	NaN	23.5442	23.6126	23.4	22.7797	22.8169	22.543	23.0794	22.6535	22.9305	22.9464	22.822	22.8297	23.3817	23.2718	23.6291	23.0445	23.3515	23.001	23.3488	23.3325	23.5109	23.1656	23.3491
0.785113	0.0350384	A0A0G2KAJ7;P70560			37	342.52	4296600000	424	25.5617	25.4793	25.7106	26.1472	26.1364	26.2897	25.9359	25.8731	25.7343	25.3338	25.4439	25.3839	26.2364	26.0295	26.1382	26.0708	25.2513	26.0395	25.7089	25.7463	25.5624	25.3244	25.4449	25.4391	26.3408	26.4245	26.6036	25.913	25.9381	26.0918	25.4633	25.35	25.4521	25.6653	25.6978	25.5334	25.7157	25.7886	25.6713	25.9492	25.992
8.82563e-06	-0.229528	A0A0G2KAM3;P49432	Pyruvate dehydrogenase E1 component subunit beta, mitochondrial	Pdhb	16	46.192	10467000000	632	27.1659	27.1239	27.1489	27.3703	27.406	27.3957	27.3492	27.3292	27.3043	27.3128	27.3211	27.2887	27.0565	27.0123	26.942	26.6948	27.0984	27.0561	27.362	27.4083	27.3468	27.2432	27.3462	27.3798	26.7807	26.8427	26.8477	27.2549	27.2687	27.2731	27.1489	27.206	27.3093	27.1988	27.2507	27.2761	27.1429	27.1447	27.0454	27.2413	27.2913
0.918837	0.0130295	A0A0G2KAM4			2	53.881	237960000	33	NaN	NaN	22.3549	NaN	NaN	NaN	22.1849	22.1719	NaN	NaN	21.9764	22.1623	22.3242	NaN	22.3362	NaN	NaN	NaN	NaN	NaN	NaN	NaN	NaN	NaN	NaN	NaN	NaN	NaN	NaN	NaN	NaN	NaN	NaN	NaN	NaN	NaN	22.0992	NaN	NaN	NaN	NaN
1	NaN	A0A0G2KAR3;F1LPK9;Q8CHJ1	Phosphatidylinositol glycan anchor biosynthesis class U protein	Pigu	1	43.173	70231000	1	NaN	NaN	NaN	NaN	NaN	NaN	NaN	NaN	NaN	NaN	NaN	NaN	NaN	NaN	NaN	NaN	NaN	NaN	NaN	NaN	NaN	NaN	NaN	NaN	NaN	NaN	NaN	NaN	NaN	NaN	NaN	NaN	NaN	NaN	NaN	NaN	NaN	NaN	NaN	NaN	NaN
1	NaN	A0A0G2KAT3;Q7TP21		Rpa1	1	67.679	0	3	NaN	NaN	NaN	NaN	NaN	NaN	NaN	NaN	NaN	NaN	NaN	NaN	NaN	NaN	NaN	NaN	NaN	NaN	NaN	NaN	NaN	NaN	NaN	NaN	NaN	NaN	NaN	NaN	NaN	NaN	NaN	NaN	NaN	NaN	NaN	NaN	NaN	NaN	NaN	NaN	NaN
1	NaN	A0A0G2KAU2;Q5XID7	Armadillo repeat-containing X-linked protein 3	Armcx3	2	47.344	24855000	1	NaN	NaN	NaN	NaN	NaN	NaN	NaN	NaN	NaN	NaN	NaN	NaN	NaN	NaN	NaN	NaN	NaN	NaN	NaN	NaN	NaN	NaN	NaN	NaN	NaN	NaN	NaN	NaN	NaN	NaN	NaN	NaN	NaN	NaN	NaN	NaN	NaN	NaN	NaN	NaN	NaN
1	NaN	D3Z8C7;A0A0G2KAW5		Wdr48	4	76.079	2341300000	11	NaN	NaN	NaN	NaN	NaN	NaN	NaN	NaN	NaN	NaN	NaN	NaN	NaN	NaN	NaN	NaN	NaN	NaN	NaN	NaN	NaN	NaN	NaN	25.236	NaN	NaN	NaN	NaN	NaN	NaN	NaN	NaN	NaN	NaN	NaN	NaN	NaN	NaN	NaN	NaN	NaN
0.0536583	-0.163574	A0A0G2KAY8;Q923V8	15 kDa selenoprotein	2015-09-01	5	17.672	830320000	143	23.4446	23.5707	23.4674	23.3479	23.3453	23.5737	23.8435	23.6135	23.9183	23.459	23.582	23.3852	23.6415	23.804	23.6516	NaN	NaN	NaN	23.534	23.4541	23.643	23.3221	23.5066	23.5545	23.7384	23.6427	23.1313	23.1207	23.1855	22.6681	23.6894	23.9898	23.6915	23.4345	23.3945	23.5581	23.6203	23.4538	23.8744	23.343	23.5229
1	-0.625205	A0A0G2KAZ7;Q3SWU3	Heterogeneous nuclear ribonucleoprotein D-like	Hnrnpdl	4	46.307	416790000	18	NaN	NaN	NaN	NaN	NaN	NaN	NaN	NaN	NaN	NaN	NaN	23.2205	NaN	NaN	NaN	NaN	NaN	NaN	23.9655	23.805	NaN	NaN	NaN	NaN	NaN	NaN	NaN	NaN	NaN	NaN	23.5069	NaN	23.0714	NaN	NaN	NaN	NaN	NaN	22.962	NaN	NaN
0.136455	0.318193	A0A0G2KB52;F1MA82		Map7	4	84.73	261790000	30	22.3396	22.642	22.6061	NaN	21.4008	NaN	22.0556	NaN	22.1316	22.2785	22.3707	22.247	22.5541	22.7642	22.1131	NaN	NaN	NaN	NaN	NaN	NaN	22.4409	22.828	22.4234	22.3644	NaN	22.4234	NaN	NaN	NaN	NaN	NaN	22.1737	22.2581	NaN	22.1288	NaN	NaN	NaN	NaN	21.8194
0.79985	0.0184359	A0A0G2KB56;P82808;Q6IE69;Q4KMC4	Glutamine--fructose-6-phosphate aminotransferase [isomerizing] 1	Gfpt1	47	78.918	54536000000	2243	29.5747	29.6151	29.5935	29.5609	29.5598	29.5286	29.4961	29.4641	29.4475	29.3879	29.4069	29.4216	29.5749	29.6221	29.5968	29.0536	28.8871	28.9514	30.0312	30.0657	29.9698	29.8455	29.8197	29.8257	29.6571	29.6336	29.6097	29.2715	29.2748	29.2995	29.8626	29.8877	29.8675	29.4635	29.4212	29.4525	29.759	29.7847	29.8424	29.6476	29.5559
0.736975	0.0337935	A0A0G2KB58;Q7TT49	Serine/threonine-protein kinase MRCK beta	Cdc42bpb	11	194.14	557720000	76	23.164	22.9675	22.7149	22.5743	22.4362	21.9442	22.7689	22.6359	22.6394	23.4399	23.5024	23.0983	23.1147	22.9694	23.2564	NaN	NaN	NaN	23.0354	22.933	22.9145	22.9955	22.5667	22.7624	22.5328	22.8984	22.7459	23.3088	23.2627	22.5685	NaN	NaN	23.2867	23.0694	22.8602	22.7423	23.0367	23.3192	23.1735	22.4721	22.9005
0.294335	-0.0894218	A0A0G2KB63;Q5XIH7	Prohibitin-2	Phb2	20	33.168	9280500000	542	27.1729	27.1688	27.1964	27.7068	27.5891	27.6309	27.2444	27.2497	27.2817	27.0813	26.8763	27.0009	26.9779	27.0726	27.0598	26.8522	27.0303	27.0658	27.1756	27.1535	27.2153	27.4363	27.4499	27.4034	26.607	26.5161	26.7102	27.192	27.0161	27.1704	26.9664	26.9591	26.8365	27.1582	27.1178	27.0902	26.7199	26.672	26.6429	27.0454	27.0929
1	NaN	A0A0G2KB92;A0A1W2Q6Q2;A0A3Q9WS43;A0A1W2Q632;O08875			4	81.003	279560000	6	NaN	NaN	NaN	NaN	NaN	NaN	NaN	NaN	NaN	NaN	NaN	NaN	NaN	NaN	NaN	NaN	NaN	NaN	NaN	NaN	NaN	NaN	NaN	NaN	NaN	NaN	NaN	NaN	NaN	NaN	NaN	NaN	NaN	NaN	NaN	NaN	NaN	NaN	NaN	NaN	NaN
1	NaN	F1M5N3;F1LM42;A0A0G2KBB9;A0A0G2JZ56;A0A0G2KAS9;F1M9N9;A0A0G2K6R9		Ank2	3	427.47	57250000	41	NaN	NaN	NaN	NaN	NaN	NaN	NaN	NaN	NaN	NaN	NaN	NaN	NaN	NaN	NaN	NaN	NaN	NaN	NaN	NaN	NaN	NaN	NaN	NaN	NaN	NaN	NaN	NaN	NaN	NaN	NaN	NaN	NaN	NaN	NaN	NaN	NaN	NaN	NaN	NaN	NaN
0.000565329	-0.27276	Q52KS1;A0A0G2KBC7;P47858;Q9Z1I3	ATP-dependent 6-phosphofructokinase;ATP-dependent 6-phosphofructokinase, muscle type	Pfkm	17	85.342	1643100000	156	24.0921	24.1175	23.9363	24.9035	24.4373	24.6122	24.731	24.3458	24.4314	24.3615	24.3199	24.5015	24.2986	24.2977	24.295	24.9408	25.4691	24.3975	24.5226	24.2398	24.4849	24.0284	24.3508	24.045	24.3825	24.2388	24.396	24.3321	24.5669	24.4726	24.4296	24.502	24.7433	24.6072	24.6382	24.7846	24.6832	24.4022	24.5741	24.4075	24.2789
0.142205	0.245192	A0A0G2QC02;Q6MG76		Skiv2l	10	137.3	192900000	74	NaN	NaN	NaN	NaN	22.5037	22.5107	NaN	22.1863	NaN	NaN	NaN	21.9334	NaN	21.9447	NaN	NaN	NaN	NaN	NaN	NaN	NaN	22.1138	NaN	22.1583	22.1967	22.0183	22.1196	NaN	NaN	NaN	NaN	NaN	NaN	NaN	NaN	NaN	NaN	NaN	NaN	22.2018	22.6351
0.473341	-0.0632205	A0A0G2QC04;B5DEY0		Pls1	35	70.389	13669000000	1021	27.2469	27.2465	27.3544	27.8673	27.763	27.8175	27.3393	27.4356	27.4281	27.6611	27.5839	27.4944	27.429	27.4065	27.5319	28.3412	28.3214	27.6946	27.9646	27.91	27.9349	27.4795	27.5513	27.5144	27.5221	27.6067	27.5594	27.4547	27.3932	27.3738	27.7079	27.7383	27.7339	27.3116	27.4155	27.3395	27.3884	27.3159	27.4837	27.6925	27.6223
0.139424	0.23173	Q7TMC7;A0A0G2QC06;Q7TP24;Q4FZX7		Tf;Srprb	47	107.41	36543000000	1542	29.2115	29.315	29.2687	28.8984	28.7151	28.993	29.1143	29.1224	29.1141	28.8673	28.848	28.8574	28.8643	28.847	28.7912	28.159	27.9489	28.1865	28.2033	28.2128	28.4105	28.8555	28.8896	28.8677	29.3346	29.353	29.3002	29.3387	29.4282	29.3361	28.122	28.115	28.1418	28.7667	28.7151	28.7446	28.7917	28.8282	28.8447	28.9423	29.0501
1	NaN	A0A1L1WKF6;B0BNF8;A0A0G2QC15		Htatip2	3	22.059	216390000	5	NaN	NaN	NaN	NaN	NaN	NaN	NaN	NaN	NaN	NaN	NaN	NaN	NaN	NaN	NaN	NaN	NaN	NaN	NaN	NaN	NaN	NaN	NaN	NaN	NaN	NaN	NaN	NaN	NaN	NaN	NaN	NaN	NaN	NaN	NaN	NaN	NaN	NaN	NaN	NaN	NaN
0.187271	0.238657	A0A0G2QC17;A1L1J4;O88483	[Pyruvate dehydrogenase [acetyl-transferring]]-phosphatase 1, mitochondrial	Pdp1	7	63.835	179660000	60	21.2979	21.5406	21.4369	NaN	NaN	NaN	21.6838	21.639	21.7072	21.576	NaN	21.4771	21.7016	22.267	NaN	NaN	NaN	NaN	21.1233	21.1513	21.1196	21.6174	21.3292	21.4704	NaN	NaN	21.558	NaN	NaN	NaN	NaN	NaN	NaN	NaN	22.3601	21.7735	NaN	NaN	22.2869	21.8473	NaN
1	0.013916	A0A0G2QC23;G3V6H1		Galc	2	75.275	229780000	10	NaN	NaN	NaN	NaN	NaN	NaN	NaN	NaN	NaN	NaN	NaN	NaN	NaN	NaN	NaN	NaN	NaN	NaN	NaN	NaN	NaN	NaN	NaN	NaN	NaN	23.383	NaN	NaN	NaN	NaN	NaN	NaN	NaN	NaN	NaN	NaN	NaN	NaN	NaN	NaN	NaN
1	NaN	Q4KM36;A0A0G2QC33		Atg4b	2	25.003	14312000	14	NaN	NaN	NaN	NaN	NaN	NaN	NaN	NaN	NaN	NaN	NaN	NaN	NaN	NaN	NaN	NaN	NaN	NaN	NaN	NaN	NaN	NaN	NaN	NaN	20.7992	NaN	NaN	NaN	NaN	NaN	NaN	NaN	NaN	NaN	NaN	NaN	NaN	NaN	NaN	NaN	NaN
1	NaN	A0A0G2QC41;A0A1L5YJQ7;D3ZVD8		Hdac6	2	125.49	41510000	4	NaN	NaN	NaN	NaN	NaN	NaN	NaN	NaN	NaN	NaN	NaN	NaN	NaN	NaN	NaN	NaN	NaN	NaN	NaN	NaN	NaN	NaN	NaN	NaN	NaN	NaN	NaN	NaN	NaN	NaN	NaN	NaN	NaN	NaN	NaN	NaN	NaN	NaN	NaN	NaN	NaN
0.707907	-0.0484972	A0A0G2QC53;D3ZJR1		Eps15l1	11	96.445	524660000	121	22.8647	22.6159	22.4392	23.4551	23.3762	23.0513	22.5229	22.8997	22.6527	22.5198	22.9211	22.7738	23.4221	22.4573	22.991	NaN	NaN	NaN	22.8585	23.1596	NaN	22.6425	22.8586	22.6742	22.7874	23.11	22.844	23.0334	23.0055	22.8269	23.4089	NaN	22.4522	NaN	22.8379	23.2897	22.548	22.3771	22.975	22.7549	22.2198
1	NaN	Q5BJZ6;A0A0G3F9V8;A0A0H2UHK4	UPF0586 protein C9orf41 homolog		2	46.384	37739000	7	NaN	NaN	NaN	NaN	NaN	NaN	NaN	NaN	NaN	NaN	NaN	NaN	NaN	NaN	NaN	NaN	NaN	NaN	NaN	NaN	NaN	NaN	NaN	NaN	NaN	21.3899	NaN	NaN	NaN	NaN	NaN	NaN	NaN	NaN	NaN	NaN	NaN	NaN	NaN	NaN	NaN
1	NaN	A0A0H2UH90;Q75WE7	von Willebrand factor A domain-containing protein 5A	Vwa5a	2	88.078	29345000	5	NaN	NaN	NaN	NaN	NaN	NaN	NaN	NaN	NaN	NaN	NaN	NaN	NaN	NaN	NaN	NaN	NaN	NaN	NaN	NaN	NaN	NaN	NaN	NaN	NaN	NaN	NaN	NaN	NaN	NaN	NaN	NaN	NaN	NaN	NaN	NaN	NaN	NaN	NaN	NaN	NaN
0.366581	0.159701	A0A0H2UH94;D3ZZL9	GRIP and coiled-coil domain-containing protein 2	Gcc2	9	195.28	248470000	37	NaN	NaN	NaN	NaN	NaN	NaN	NaN	NaN	22.4508	NaN	NaN	21.802	NaN	22.1136	22.5803	NaN	NaN	NaN	NaN	NaN	21.9728	NaN	22.0689	NaN	NaN	NaN	NaN	NaN	NaN	NaN	NaN	NaN	NaN	21.9356	NaN	NaN	NaN	NaN	NaN	NaN	NaN
0.21462	0.260243	A0A0H2UHA6;Q9Z142	Transmembrane protein 33	Tmem33	4	27.884	433800000	56	23.0856	22.8841	23.4563	NaN	NaN	22.4784	NaN	22.9882	NaN	21.9123	22.0099	NaN	NaN	23.1459	NaN	NaN	NaN	NaN	NaN	NaN	NaN	23.7598	23.2089	23.2638	23.0078	23.3191	22.9879	22.6529	22.1808	22.1929	22.4502	22.0305	21.856	22.9147	23.2588	22.8705	22.7538	22.5739	22.6481	22.8288	23.0244
1	NaN	Q9QYA6;A0A0H2UHB7;Q9JI66	Anion exchange protein;Electrogenic sodium bicarbonate cotransporter 1	Slc4a4	2	121.35	88388000	3	NaN	NaN	NaN	NaN	NaN	NaN	NaN	NaN	NaN	NaN	NaN	NaN	NaN	NaN	NaN	NaN	NaN	NaN	NaN	NaN	NaN	NaN	NaN	NaN	NaN	NaN	NaN	NaN	NaN	NaN	NaN	NaN	NaN	NaN	NaN	NaN	NaN	NaN	NaN	NaN	NaN
0.0414642	-0.239879	A0A0H2UI32;A0A0H2UHD6;Q9ET32;Q8CFC4;M0RE11;D4A7T1	Histo-blood group ABO system transferase 1	Abo	10	39.859	2635100000	287	24.8829	24.7915	24.8513	25.5555	25.7138	25.7255	25.3201	25.373	25.4179	25.0486	24.9628	24.9061	25.4906	25.4649	25.4595	24.3399	24.3886	24.1264	25.7871	25.7814	25.7632	25.4823	25.4924	25.4627	24.6978	24.7195	24.6315	25.1417	25.3196	25.2322	25.5109	25.5098	25.3411	25.3232	25.2221	25.3413	25.2335	25.0653	25.278	25.3144	25.1231
1	NaN	A0A0H2UHD9;Q5XIA1	Nicalin	Ncln	2	62.863	50862000	4	NaN	NaN	NaN	NaN	NaN	NaN	NaN	NaN	NaN	NaN	NaN	NaN	NaN	NaN	NaN	NaN	NaN	NaN	NaN	NaN	NaN	NaN	NaN	NaN	NaN	NaN	NaN	NaN	NaN	NaN	NaN	NaN	NaN	NaN	NaN	NaN	NaN	NaN	NaN	NaN	NaN
0.863444	-0.0112751	P13086;A0A0H2UHE1;P70631	Succinyl-CoA ligase [ADP/GDP-forming] subunit alpha, mitochondrial	Suclg1	18	36.148	9662500000	515	27.0189	26.955	27.0112	27.3634	27.2607	27.3236	26.7672	26.868	26.8404	27.1477	27.1261	27.0762	26.9365	26.7912	27.0202	27.2791	27.6107	27.3639	27.0841	27.0253	27.0954	27.1093	27.2539	27.1914	26.8887	26.9224	26.8873	27.1509	27.1234	26.9823	27.3234	27.4064	27.4015	27.104	27.0578	26.997	27.0683	26.9206	27.1278	27.1461	27.2566
0.145134	0.114743	P20650;A0A0H2UHE5;Q4V8L2	Protein phosphatase 1A	Ppm1a	12	42.416	1146400000	153	24.0645	24.0708	24.0531	22.9454	22.9779	23.7001	23.8231	23.7973	23.869	24.0426	24.1522	24.1501	24.1316	24.0403	24.2899	24.7191	24.0669	23.968	24.0182	24.0774	23.7551	23.9406	23.8797	24.0063	23.8856	23.9607	23.9492	23.2075	23.1257	23.2098	23.7439	23.669	23.87	24.082	24.1849	24.0443	24.5545	24.3132	23.5868	23.4176	23.6342
0.776177	-0.0241585	A0A0H2UHF6;Q9ES40	PRA1 family protein 3	Arl6ip5	3	23.639	946350000	108	23.7974	23.5718	23.5717	24.459	24.4936	24.4406	23.7042	23.9554	23.6935	23.163	23.6235	23.2835	23.8996	23.8735	23.8597	NaN	NaN	NaN	23.2247	23.5831	23.6196	24.1491	24.242	24.1257	23.6368	23.5274	23.8998	24.25	24.2855	24.5	23.8813	23.4895	23.8003	24.0458	23.9732	23.9314	23.5426	23.4783	23.4928	24.2156	24.24
0.0331744	-0.143358	A0A0H2UHG3;Q9JJ31	Cullin-5	Cul5	9	98.767	428640000	46	NaN	22.476	22.4979	22.8776	NaN	22.6626	22.4294	22.4854	22.4936	NaN	NaN	22.4442	22.372	22.3091	22.5263	NaN	NaN	NaN	22.9007	22.6017	22.5084	22.381	22.0018	22.4111	22.4455	NaN	22.4795	NaN	22.6688	NaN	22.5159	22.7325	NaN	22.5962	22.5489	22.3722	22.5923	22.656	22.3223	22.7582	22.4763
0.188699	0.065708	A0A0H2UHG7;D3ZZK1;P60868;A0A0G2K6L6;M0RB28;M0R566;M0R5V6;A0A0G2K8W1;M0R987;A0A0G2JY70;A0A0G2K3E9;A0A0G2K632	40S ribosomal protein S20	LOC100359563;Rps20;LOC100909911;RGD1563124;RGD1562725;LOC100364116	10	13.241	8834200000	376	26.9381	27.0092	27.116	26.4513	26.6544	26.4486	26.92	26.9201	27.0569	27.0444	27.0768	27.0661	27.0005	26.9787	26.8939	25.8845	25.696	26.214	26.9266	27.1129	26.9987	27.2343	27.1394	27.2026	26.9809	27.067	27.0706	26.3908	26.1795	26.4624	27.0592	27.0928	27.0918	27.1424	27.0932	27.1874	27.4156	27.3144	27.4261	26.8469	26.8066
0.540717	-0.0484673	A0A0H2UHH9;D4ACJ1;P62850;D3ZFZ8	40S ribosomal protein S24	LOC100363469;Rps24	7	15.197	4881900000	233	25.9935	26.1721	26.0758	26.3369	26.3286	26.2619	26.0744	26.2006	26.1084	25.7645	25.4997	25.5287	25.8989	25.9788	26.05	24.8574	24.865	25.1711	26.145	26.1396	26.1524	26.2289	26.1973	26.1951	26.1084	26.0883	26.0481	26.3851	26.4845	26.48	26.1218	26.0919	26.0507	25.9592	26.0603	26.0394	26.5153	26.2263	26.4267	26.5637	26.6849
0.0301461	0.397604	F1LNL6;A0A0H2UHI0;B4F7E9;Q5XIU2	Zinc finger protein 76;Zinc finger protein 143	Zfp523;Znf76;Znf143	1	61.673	1370800000	41	25.1331	25.5037	25.182	NaN	NaN	23.8172	24.2589	24.2654	24.0278	23.0415	23.4009	23.3457	24.5224	24.4948	24.4512	23.7594	NaN	NaN	24.6937	24.6837	24.5489	24.2378	24.334	24.2916	24.7858	24.6347	24.8151	24.1098	24.1959	NaN	24.6172	24.5427	24.697	23.8758	23.8108	23.7069	23.9622	24.1102	23.9261	24.2777	24.292
0.000292204	-0.255884	A0A0H2UHI2;Q01986	Dual specificity mitogen-activated protein kinase kinase 1	Map2k1	10	40.96	2721900000	221	25.1178	24.9616	25.1475	25.0501	25.357	25.0146	25.3727	25.2399	25.1457	25.3704	25.4773	25.7677	25.0886	25.0194	25.1238	24.5418	NaN	24.9489	25.46	25.3066	25.4282	24.9511	24.9888	24.8463	25.2546	25.0809	24.9995	25.4831	25.1955	25.3743	25.6666	25.6888	25.6748	25.0293	25.0086	24.8631	24.938	25.0338	25.0463	25.596	25.4526
1	NaN	A0A0H2UHI7;Q505J9	ATPase family AAA domain-containing protein 1	Atad1	4	45.091	160690000	6	NaN	NaN	NaN	NaN	NaN	NaN	NaN	NaN	NaN	NaN	21.4471	21.603	NaN	NaN	NaN	NaN	NaN	NaN	NaN	NaN	NaN	21.4953	NaN	21.5534	NaN	NaN	NaN	NaN	NaN	NaN	NaN	NaN	NaN	NaN	21.7903	NaN	NaN	NaN	NaN	NaN	NaN
1	NaN	A0A0H2UHJ1;P50116	Protein S100-A9	S100a9	1	15.22	29618000	3	NaN	NaN	NaN	NaN	NaN	NaN	NaN	NaN	NaN	NaN	NaN	NaN	NaN	NaN	NaN	NaN	NaN	NaN	NaN	NaN	NaN	NaN	NaN	NaN	NaN	NaN	NaN	NaN	NaN	NaN	NaN	NaN	NaN	NaN	NaN	NaN	NaN	NaN	NaN	NaN	NaN
1	NaN	A0A0H2UHJ5;Q562A2;B1WC00	Zinc finger RNA-binding protein	Zfr	4	116.91	95692000	24	NaN	NaN	NaN	NaN	21.3659	21.4699	21.5442	NaN	NaN	21.5343	NaN	21.8888	NaN	NaN	NaN	NaN	NaN	NaN	NaN	NaN	NaN	NaN	21.6607	NaN	NaN	NaN	NaN	NaN	NaN	NaN	NaN	NaN	NaN	NaN	NaN	NaN	NaN	NaN	NaN	NaN	NaN
1	NaN	A0A0H2UHK0;Q6TXG9	Swi5-dependent recombination DNA repair protein 1 homolog	Sfr1	4	29.016	76557000	9	NaN	21.5671	NaN	NaN	NaN	NaN	NaN	NaN	NaN	NaN	NaN	NaN	NaN	NaN	NaN	NaN	NaN	NaN	NaN	NaN	NaN	NaN	NaN	NaN	NaN	NaN	NaN	NaN	NaN	NaN	NaN	NaN	NaN	NaN	NaN	NaN	NaN	NaN	NaN	NaN	NaN
1	NaN	A0A3B0IYY4;A0A0H2UHK1;P31722	Complement C1q subcomponent subunit C	C1qc	2	28.204	66628000	16	NaN	NaN	NaN	NaN	NaN	NaN	NaN	NaN	NaN	NaN	NaN	NaN	NaN	NaN	NaN	NaN	NaN	NaN	NaN	NaN	NaN	NaN	NaN	NaN	NaN	NaN	NaN	NaN	NaN	NaN	NaN	NaN	NaN	NaN	NaN	NaN	NaN	NaN	NaN	NaN	NaN
0.768892	-0.0570124	A0A0H2UHL3;A2RUV9	Adipocyte enhancer-binding protein 1	Aebp1	7	127.99	296980000	34	NaN	22.3082	22.1061	NaN	NaN	NaN	22.113	21.8087	22.0217	21.8311	NaN	NaN	22.6589	NaN	21.9284	NaN	NaN	NaN	NaN	NaN	NaN	NaN	NaN	21.9798	21.7414	22.2332	22.3138	NaN	NaN	NaN	NaN	NaN	NaN	21.9369	21.8185	21.8667	22.3838	22.3598	22.6298	NaN	NaN
0.369275	-0.0796587	C6L8E0;A0A0H2UHL9;Q07266	Drebrin	Dbn1	5	72.601	218070000	20	21.9336	21.8576	22.1602	NaN	NaN	NaN	21.8484	21.8278	22.0456	21.8552	21.8672	21.5952	21.8472	21.7926	22.0563	NaN	NaN	NaN	NaN	NaN	NaN	22.493	NaN	NaN	NaN	22.0653	21.7924	21.4705	NaN	NaN	NaN	21.489	NaN	21.983	21.6791	NaN	NaN	NaN	21.8442	NaN	NaN
0.0381668	-0.163622	A0A0H2UHM0;B5DEN9	Vacuolar protein sorting-associated protein 28 homolog	Vps28	8	25.468	621560000	48	NaN	23.2196	22.7116	23.3228	23.632	23.4216	23.0931	23.1782	23.0537	23.2063	23.1739	22.929	23.0845	22.9589	22.6571	NaN	NaN	NaN	23.3504	23.3442	23.8402	23.1554	22.9828	22.6805	23.0415	23.1277	23.2415	23.223	23.3761	23.3564	23.3286	23.1885	23.0905	22.7985	22.9179	22.8875	23.135	23.1283	22.9675	23.3479	23.4748
0.349322	0.177798	A0A0H2UHM3;P06866	Haptoglobin;Haptoglobin alpha chain;Haptoglobin beta chain	Hp	6	38.432	2244000000	141	25.3841	25.0839	25.3093	24.6244	24.4922	24.7457	25.1632	25.2996	26.0442	24.7104	25.0002	25.0142	24.5462	24.6855	24.6055	NaN	NaN	NaN	24.9496	25.0583	24.9399	24.9194	24.6813	24.8966	25.0074	25.3355	25.1796	24.785	24.7497	24.7938	24.6004	24.77	24.5482	24.4958	24.2906	23.6691	25.4983	25.5988	25.6783	24.9966	24.9221
0.304412	-0.0430236	A0A0H2UHM5;P11598	Protein disulfide-isomerase A3	Pdia3	67	57.078	113010000000	2867	30.6359	30.6053	30.5933	30.5121	30.4713	30.5089	30.598	30.6265	30.603	30.6967	30.7168	30.7008	30.6038	30.6838	30.7121	30.4391	30.5401	30.4779	30.7939	30.8378	30.8305	30.7645	30.7869	30.7458	30.4421	30.3619	30.3824	30.5358	30.5309	30.5233	30.6998	30.6798	30.7075	30.6722	30.6694	30.6252	30.6317	30.6949	30.6994	30.5688	30.5196
0.267221	-0.0897062	A0A0H2UHM7;Q6AYZ1	Tubulin alpha-1C chain	Tuba1c	5	49.806	4317100000	150	26.0494	25.9302	25.7965	26.1827	26.3733	26.391	25.9058	26.0456	26.1767	25.7911	25.6899	25.8051	26.155	26.3008	26.1787	25.2263	25.2215	25.0825	26.2451	26.3342	26.0389	26.12	25.9516	26.0915	26.1101	26.0464	25.7121	25.9761	26.2407	25.9515	26.0849	26.2347	26.1936	25.778	25.8023	25.6809	25.7693	25.7547	25.6393	25.9826	26.3667
1	NaN	A0A0H2UHP8;B4F766;D3ZP27	Dymeclin	Dym	3	75.877	105310000	5	NaN	NaN	NaN	NaN	NaN	NaN	NaN	NaN	NaN	NaN	NaN	NaN	NaN	NaN	NaN	NaN	NaN	NaN	NaN	NaN	NaN	NaN	NaN	NaN	NaN	NaN	NaN	NaN	NaN	NaN	NaN	NaN	NaN	NaN	NaN	NaN	NaN	NaN	NaN	NaN	NaN
1	NaN	A0A0H2UHQ0;Q794F9	4F2 cell-surface antigen heavy chain	Slc3a2	3	61.874	140680000	8	NaN	NaN	NaN	NaN	NaN	NaN	NaN	NaN	NaN	NaN	NaN	NaN	NaN	NaN	NaN	NaN	NaN	NaN	NaN	NaN	NaN	NaN	NaN	NaN	NaN	NaN	NaN	NaN	NaN	NaN	NaN	NaN	NaN	NaN	NaN	NaN	NaN	NaN	NaN	NaN	NaN
0.0872336	-0.263021	A0A0H2UHQ1;F1LZX7;P24049;D3Z9G9;A0A0G2KB77;Q7TPJ7	60S ribosomal protein L17	Rpl17;RGD1560017;RGD1359290	12	21.967	2548300000	311	24.8678	24.7897	24.4772	24.8585	24.7069	24.9413	25.5757	25.8053	25.5415	24.6288	24.6193	24.4002	25.0941	24.9402	25.1403	24.7042	25.0556	23.7951	24.927	25.0191	24.858	25.0898	24.8091	24.7772	25.2605	25.1923	25.2022	24.9579	24.8896	24.7787	25.0234	25.1501	25.3012	24.9803	24.7607	24.9764	25.3763	25.544	25.3835	25.5491	25.565
1	NaN	A0A0H2UHQ3;B5DFH2;P0C5W1	Microtubule-associated protein 1S;MAP1S heavy chain;MAP1S light chain	Map1s	2	102.43	8138200	4	NaN	NaN	NaN	NaN	NaN	NaN	NaN	NaN	NaN	NaN	NaN	NaN	NaN	NaN	NaN	NaN	NaN	NaN	NaN	NaN	NaN	NaN	NaN	NaN	NaN	NaN	NaN	NaN	NaN	NaN	NaN	NaN	NaN	NaN	NaN	NaN	NaN	NaN	NaN	NaN	NaN
0.000292477	0.272832	A0A0H2UHQ8;D3ZFA8;P04644;D3ZHU9;D3ZKG6;M0R8M8;F1M5B1;D3ZM01	40S ribosomal protein S17	LOC100364909;Rps17;LOC100361180;RGD1559955	12	15.379	14194000000	396	27.6824	27.6798	27.6619	27.4202	27.5066	27.3067	27.5573	27.514	27.4754	27.2286	27.3181	27.3317	27.8598	27.644	27.7049	28.7692	28.7954	28.6899	27.4092	27.3317	27.2871	27.598	27.5192	27.4942	27.7673	27.7745	27.7704	27.5789	27.7475	27.8189	27.47	27.4028	27.2934	27.5587	27.4019	27.4366	27.9376	27.8205	27.6745	27.8608	27.7699
0.326946	0.163808	A0A0H2UHR7;D3ZHA0	Filamin-C	Flnc	96	287.3	74866000000	3189	29.6395	29.6847	29.6313	30.5353	30.602	30.568	29.8742	29.9156	29.884	29.8732	29.9327	29.901	29.8979	29.9454	29.9432	29.4205	29.5517	29.2109	28.9576	29.034	29.0458	29.599	29.6178	29.6762	30.0723	30.0461	30.1167	30.2501	30.2447	30.1979	29.0515	29.0661	29.0301	30.2019	30.2391	30.2492	29.8239	29.7707	29.8863	30.0372	30.0234
0.35846	0.0656864	P12001;A0A0H2UHS7;Q0QEW8	60S ribosomal protein L18	Rpl18	10	21.658	8936400000	408	27.0154	26.7753	26.8527	26.3739	26.2185	26.2346	26.9507	27.036	27.0947	26.1568	26.0857	26.0449	26.96	26.9437	26.9577	27.2618	26.492	26.518	26.8775	26.7279	26.8818	27.3047	27.3718	27.2479	27.3154	27.4437	27.2114	26.2193	26.3361	26.2721	27.1122	26.9717	26.9993	27.2107	27.2319	27.1118	27.3286	27.3109	27.2338	26.6161	26.6154
1	NaN	A0A0H2UHT3;P0C2C0	39S ribosomal protein L22, mitochondrial	Mrpl22	2	25.865	115530000	7	NaN	NaN	NaN	NaN	NaN	NaN	NaN	NaN	NaN	NaN	NaN	NaN	NaN	NaN	NaN	NaN	NaN	NaN	NaN	NaN	NaN	NaN	NaN	NaN	NaN	NaN	NaN	NaN	NaN	NaN	NaN	NaN	NaN	NaN	NaN	NaN	NaN	NaN	NaN	NaN	NaN
0.0032999	0.296681	Q8K3W9;A0A0H2UHT5;F1LNI5	Protein phosphatase 1G	Ppm1g	6	58.716	577460000	123	22.8745	23.3117	23.1161	NaN	NaN	NaN	22.3518	22.6321	22.5555	22.9058	22.8512	23.1378	23.0979	23.1996	23.0367	NaN	23.4665	24.1124	22.9077	22.5333	NaN	22.6446	22.9678	23.2781	22.8068	22.876	22.9247	NaN	22.5471	22.6868	22.7199	23.176	23.1866	23.1025	23.0681	23.0431	23.3627	23.4316	23.3593	22.4046	NaN
0.169002	0.11117	A0A0H2UHT6;D3ZM33;P62271;M0R5K9;D3ZAU6;A0A0G2KA79;D4AA93	40S ribosomal protein S18	LOC100362298;Rps18;LOC100912024;RGD1561919	19	17.587	9865100000	416	27.1863	27.2474	27.2018	26.2295	26.181	26.2982	27.1954	27.2666	27.157	26.3403	26.3442	26.3065	27.2625	27.2689	27.3063	27.2736	26.6686	26.7316	27.2452	27.207	27.2712	27.464	27.2897	27.3913	27.4227	27.4656	27.4228	26.3755	26.4027	26.5988	27.2222	27.1217	27.2548	27.2408	27.1353	27.2334	27.6564	27.6776	27.6594	27.1341	27.0508
1	NaN	F1M6F4;A0A0H2UHU0;P62853;D4AE10;M0R763;D3ZCH5	40S ribosomal protein S25	LOC100912210;Rps25;RGD1563613;LOC100911337;LOC100359763	4	13.644	1683400000	5	NaN	NaN	NaN	NaN	NaN	NaN	NaN	NaN	NaN	NaN	NaN	NaN	NaN	NaN	NaN	NaN	NaN	NaN	NaN	NaN	NaN	NaN	NaN	NaN	NaN	NaN	NaN	NaN	NaN	NaN	NaN	NaN	NaN	NaN	NaN	NaN	NaN	NaN	NaN	NaN	NaN
0.541644	-0.102077	A0A0H2UHU1;P61515;D4AAZ6;D4A7B1	Putative 60S ribosomal protein L37a;60S ribosomal protein L37a	Rpl37a-ps1;Rpl37a;LOC679823	6	10.276	1671100000	166	24.0039	23.9584	24.1032	23.5088	23.2623	23.4566	24.7671	24.7869	24.7007	24.1356	24.0445	24.2151	24.7389	24.4595	24.5658	23.8917	23.8218	23.9626	24.7176	24.6984	24.6312	24.3798	24.2988	24.5046	24.5374	24.5889	24.7647	23.5287	23.3839	23.6829	24.2196	24.0901	24.1542	24.7163	24.5789	24.71	25.0692	25.1049	25.1859	24.4476	24.6052
1	NaN	A0A0H2UHV1;Q5XHY1	Leucine-rich repeat-containing protein 16B	Lrrc16b	2	150.07	343570000	24	NaN	NaN	NaN	NaN	NaN	NaN	NaN	NaN	NaN	NaN	NaN	NaN	NaN	NaN	NaN	NaN	NaN	NaN	NaN	NaN	NaN	NaN	NaN	NaN	NaN	NaN	NaN	NaN	NaN	NaN	NaN	NaN	NaN	NaN	NaN	NaN	NaN	22.8907	22.9031	NaN	NaN
0.272084	0.0826582	A0A0H2UHV4;M0R7Z0;B2GUV7;Q4FZQ8	Eukaryotic translation initiation factor 5B	Eif5b;Eif5b-ps1	7	136.41	770430000	49	23.3705	23.3119	23.232	NaN	NaN	NaN	23.2405	23.2898	23.4383	23.2659	23.6477	23.2714	23.3403	23.4416	23.2994	NaN	NaN	23.6442	23.85	23.3202	NaN	23.4985	23.8112	23.6721	23.523	NaN	NaN	NaN	NaN	23.9284	NaN	NaN	NaN	23.4219	23.4391	23.7592	23.6321	23.6971	23.5773	NaN	24.1952
0.409545	0.15652	A0A0H2UHV6;P63100;A0A0G2K4H3	Calcineurin subunit B type 1	Ppp3r1	6	18.208	520210000	54	22.6312	23.2017	22.8944	23.4956	23.4486	NaN	NaN	22.9695	22.9371	22.6041	22.602	22.5395	22.6766	23.4389	23.3815	NaN	NaN	NaN	NaN	NaN	NaN	22.2031	22.5176	NaN	23.3069	23.6149	23.7376	23.0662	22.6597	21.7596	NaN	NaN	NaN	22.7018	22.407	22.6701	22.3898	NaN	NaN	22.3491	22.4243
1	NaN	A0A0H2UHV7;D3ZX08	Alanine--tRNA ligase, mitochondrial	Aars2	2	99.264	39918000	7	NaN	NaN	NaN	NaN	NaN	NaN	NaN	NaN	NaN	NaN	NaN	NaN	NaN	NaN	NaN	NaN	NaN	NaN	NaN	NaN	NaN	NaN	NaN	NaN	NaN	NaN	NaN	NaN	NaN	NaN	NaN	NaN	NaN	NaN	NaN	NaN	NaN	NaN	NaN	NaN	NaN
0.423663	-0.058308	A0A0H2UHV9;D4ABY2	Coatomer subunit gamma-2	Copg2	15	97.569	1437800000	181	23.9553	23.9353	24.0571	24.4056	24.616	24.7219	24.3045	24.2959	24.2924	24.1824	24.1503	24.2903	24.2431	24.1493	24.1363	24.9393	NaN	24.9481	24.4079	24.3959	24.6605	24.2507	23.9787	24.3086	24.6241	24.4425	24.2747	24.0757	23.8786	23.995	24.4977	24.6737	24.4687	24.2581	23.9577	23.9455	24.5317	24.4909	24.4151	24.2826	24.3181
0.355311	0.102836	Q9ESQ5;A0A0H2UHX0;A7L639	Transient receptor potential cation channel subfamily M member 4	Trpm4	12	135.34	901380000	95	23.6328	23.6456	23.7778	24.2179	24.5747	24.117	24.0248	23.979	23.7256	23.833	23.687	24.0165	23.9546	23.5879	23.839	NaN	NaN	NaN	23.4482	23.4716	23.64	24.0381	23.9163	24.0337	NaN	NaN	23.4782	24.2269	23.8826	24.0664	24.0032	23.45	23.3437	23.4509	23.4606	23.9386	23.3137	23.4625	23.447	23.7533	23.6111
0.621695	-0.0256045	A0A0H2UHX1;A1L1I6;Q6RJR6	Reticulon;Reticulon-3	Rtn3	4	28.227	3242000000	243	25.3245	25.233	25.3605	25.4838	25.5926	25.3104	25.4608	25.3889	25.408	25.1203	24.8454	25.1358	25.1895	25.3303	25.4076	26.3089	26.6051	26.9773	25.4616	25.2279	25.4391	25.5533	25.6037	25.6806	25.4073	25.4343	25.4976	25.4657	25.3501	25.5107	25.1667	25.1542	25.471	25.473	25.436	25.3007	25.2167	25.3339	25.342	25.4161	25.5523
0.267994	0.0846358	X1WI37;A0A0H2UHX3;P62703;D3ZX01	40S ribosomal protein S4, X isoform	LOC100362640;Rps4x	26	29.466	15238000000	826	27.8314	27.796	27.8624	27.6398	27.5326	27.6468	27.6815	27.7688	27.6721	26.7938	26.9017	26.8307	27.7832	27.859	27.7987	27.4102	27.5532	27.4102	27.8495	28.0667	28.0269	28.0341	28.0046	28.0629	27.7589	27.7741	27.7476	27.6784	27.7294	27.6711	28.0084	27.9418	27.9779	27.7745	27.7564	27.7476	28.3	28.2927	28.314	27.8423	27.8792
1.47307e-05	-0.219411	A0A0H2UHZ2;Q5U2Z3	Nucleosome assembly protein 1-like 4	Nap1l4	13	44.043	3466300000	414	25.3712	25.4249	25.6263	25.6573	25.8289	25.4136	25.5238	25.6553	25.5992	25.4471	25.4449	25.4016	25.5134	25.6102	25.5101	NaN	24.6963	NaN	25.6975	25.7719	25.5367	25.2088	25.3454	25.3584	25.6884	25.4973	25.5079	25.5949	25.8785	25.9187	25.7436	25.6039	25.9745	25.5192	25.5785	25.4788	25.3294	25.2802	25.3888	25.6374	25.7066
1	NaN	A0A0H2UHZ4;O35986	Zinc finger Ran-binding domain-containing protein 2	Zranb2	1	37.837	110630000	2	NaN	NaN	NaN	NaN	NaN	NaN	NaN	NaN	NaN	NaN	NaN	NaN	NaN	NaN	NaN	NaN	NaN	NaN	NaN	NaN	NaN	NaN	NaN	NaN	NaN	NaN	NaN	NaN	NaN	NaN	NaN	NaN	NaN	NaN	NaN	NaN	NaN	NaN	NaN	NaN	NaN
0.0268368	-0.183072	A0A0H2UHZ6;Q9WV25	Poly(U)-binding-splicing factor PUF60	Puf60	7	60.12	1946500000	196	24.513	24.5987	24.4119	25.0039	25.1229	25.0423	24.8603	24.9985	24.6387	24.4876	24.7437	24.8294	24.7582	24.7095	24.6419	NaN	NaN	NaN	25.1987	25.2188	25.2018	24.6312	24.8875	25.0136	25.0787	24.9136	24.8963	24.4493	24.7605	24.7211	24.87	24.9161	24.5983	24.7092	24.7229	24.7847	24.6383	24.7118	24.8243	24.533	24.8468
0.987923	-0.00151494	B1WBN9;A0A0H2UI07;P12928	Pyruvate kinase;Pyruvate kinase PKLR	Pklr	26	58.793	3045700000	237	25.0554	25.1566	25.3015	25.5261	25.6042	25.5633	25.5258	25.2843	25.2989	25.1583	25.2947	25.0768	25.4089	25.3414	25.5373	25.2734	25.9865	25.9334	25.8139	25.7386	25.8197	25.5187	25.3922	25.1076	25.7945	25.6946	25.8272	25.5877	25.4245	25.2725	24.9228	25.2741	25.1939	25.2801	25.2122	24.9183	25.2986	25.0731	25.1553	25.2702	25.1529
0.293772	-0.0619469	A0A0H2UI10;Q8VIJ5	Protein O-GlcNAcase	Mgea5	9	106.17	579010000	40	23.0445	22.9964	NaN	23.3115	NaN	NaN	23.2148	23.0914	23.0092	22.9332	NaN	23.0105	23.1884	NaN	22.9351	NaN	NaN	NaN	23.321	23.3538	23.481	23.1534	22.833	23.0805	23.2787	23.3344	23.1445	NaN	NaN	NaN	NaN	NaN	23.3265	23.2087	23.1682	23.1209	23.1643	NaN	23.0413	23.2829	23.1401
0.216409	-0.453731	A0A0H2UI11;P62893	60S ribosomal protein L39	Rpl39	2	6.2754	1164400000	72	23.355	NaN	NaN	NaN	NaN	24.3301	24.112	24.1115	NaN	23.9484	23.9979	23.878	24.1664	NaN	NaN	NaN	24.7005	24.5401	24.2456	NaN	NaN	24.6204	NaN	24.4118	NaN	NaN	NaN	23.5808	NaN	23.8381	NaN	NaN	NaN	NaN	NaN	NaN	24.0972	24.4118	23.997	24.2162	24.3343
0.618117	0.0320733	Q6AZ26;F7FG31;A0A0H2UI20;Q9Z2F5	C-terminal-binding protein 1	Ctbp1	9	42.629	1384400000	173	24.0126	24.073	24.2213	24.615	24.5399	24.4786	24.1038	24.2458	24.1277	24.2884	23.9805	23.9834	24.1779	24.3494	24.1805	24.2611	24.6747	24.4215	24.1539	23.9188	23.9055	23.9697	23.8246	24.0081	24.456	24.5229	24.4013	24.3117	24.3633	24.1671	23.9011	24.1091	24.0651	24.1095	24.0933	23.942	24.1807	23.9607	23.9982	24.1431	24.0992
1	NaN	A0A0H2UI21;Q704S8	Carnitine O-acetyltransferase	Crat	2	71.013	22348000	12	NaN	NaN	NaN	NaN	NaN	NaN	NaN	NaN	NaN	NaN	NaN	NaN	NaN	NaN	NaN	NaN	NaN	NaN	NaN	NaN	NaN	NaN	NaN	NaN	NaN	NaN	NaN	NaN	NaN	NaN	NaN	NaN	NaN	NaN	NaN	NaN	NaN	NaN	NaN	21.766	NaN
1	NaN	A0A0K0WYI6;F1M0J3;Q9R1N3;A0A0K0WYG5	Anion exchange protein;Sodium bicarbonate cotransporter 3	Slc4a7	3	125.33	108420000	1	NaN	NaN	NaN	NaN	NaN	NaN	NaN	NaN	NaN	NaN	NaN	NaN	NaN	NaN	NaN	NaN	NaN	NaN	NaN	NaN	NaN	NaN	NaN	NaN	NaN	NaN	NaN	NaN	NaN	NaN	NaN	NaN	NaN	NaN	NaN	NaN	NaN	NaN	NaN	NaN	NaN
0.728662	-0.0427109	A0A0U1RRT8;B5DFG5;A0A0U1RRW2		2006-09-01	8	49.409	841110000	131	23.4429	23.4413	23.4558	23.0877	23.42	23.4057	23.4887	23.2051	23.2856	23.2024	23.4413	23.4188	22.9553	23.8145	23.8022	25.192	24.2696	24.5613	23.9336	23.4857	22.826	23.612	23.4284	23.5591	23.8726	24.0469	24.0701	23.3472	23.6394	23.7462	23.5733	23.5823	23.4654	23.4324	23.3613	23.3697	23.4677	23.3433	23.1603	23.3875	23.3312
1	NaN	Q4KLN3;E9PTN4;A0A0U1RRU0;A0A096MJB4;G3V8I2;A0A0G2KAH6;B1WBT4;A0A0G2JX62		Srpk1;Srpk2;Srpk3	2	73.855	49551000	6	NaN	NaN	NaN	NaN	NaN	NaN	NaN	NaN	NaN	NaN	NaN	NaN	NaN	NaN	NaN	NaN	NaN	NaN	NaN	NaN	NaN	NaN	NaN	NaN	NaN	NaN	NaN	NaN	NaN	NaN	NaN	NaN	NaN	NaN	NaN	NaN	NaN	NaN	NaN	NaN	NaN
0.991135	-0.00102857	A0A0U1RRV5;D3ZKG9	Clustered mitochondria protein homolog	Cluh	23	151.16	1307100000	206	23.6032	23.8057	23.9811	24.2876	24.731	24.7337	24.1517	24.0804	24.1378	24.2747	24.6308	24.3419	24.2008	23.8169	23.7558	25.1295	24.0975	25.5774	24.0236	24.224	24.2513	24.1673	24.1575	23.9287	24.129	24.0516	23.8746	23.3512	23.4752	23.8592	24.1911	24.2381	23.9111	23.8418	23.8958	23.4902	23.9938	24.4292	24.1455	24.6182	24.6387
0.101456	-0.14121	A0A0U1RRV7;Q0ZFS8		Srsf3	9	14.203	4361900000	293	25.9096	25.8473	25.8204	25.5286	25.6559	25.7748	25.9114	25.8055	25.8004	26.0141	26.223	26.1553	25.9118	25.8933	25.8895	25.7882	24.5841	24.8458	26.3101	26.1317	26.321	26.104	26.1965	26.0215	26.2506	26.2164	26.239	25.7065	25.7459	25.715	26.0048	26.1479	26.0738	26.0717	26.1105	26.3016	25.8542	25.9417	25.7586	25.671	25.8605
0.161281	0.0965211	F1LY19;A0A0U1RS25		Upf1	26	122.64	3076900000	220	25.5352	25.4478	25.2275	25.562	25.4896	25.783	25.353	25.4448	25.0929	25.4526	25.5275	25.4409	25.3203	25.4905	25.4865	NaN	25.2163	NaN	25.4733	25.6727	25.5064	25.3346	25.3009	25.3783	25.608	25.5447	25.5452	25.2178	25.2809	25.3666	25.3174	25.2249	25.2409	25.1509	25.1157	25.3574	25.5146	25.1866	25.4136	25.4893	25.7501
0.64056	0.0439879	O55215;A0A0U1RVI9;P27952;O55211;O55214;O55212;E9PT76;A0A0G2KB28;D3ZT78;D3ZIY7;D3ZQW7;M0RAJ8;O55213	40S ribosomal protein S2	Rps2-ps6;Rps2;Gm8225;LOC100359960	18	27.231	11339000000	569	26.9508	26.94	26.9945	26.9051	26.6457	27.0718	27.3801	27.3232	27.3067	27.1415	27.0745	27.0652	27.1172	27.2047	27.1823	27.4413	27.3865	27.674	27.1891	27.2295	27.2188	27.2911	27.306	27.2149	27.5669	27.4742	27.4906	26.5803	26.8094	26.7991	27.3154	27.2146	27.3543	27.1939	27.2424	27.2859	27.7469	27.7993	27.7381	27.3734	27.3259
0.197766	-0.057265	A0A140TAA4;Q9QZA2	Programmed cell death 6-interacting protein	Pdcd6ip	41	95.881	11026000000	1075	27.0809	27.1128	27.0384	27.4755	27.508	27.4777	27.251	27.2888	27.2576	27.5222	27.4769	27.4102	27.2522	27.3482	27.3047	26.9012	26.8418	26.8348	27.5116	27.4252	27.4349	27.1786	27.2478	27.1923	27.3457	27.4151	27.3826	27.0875	27.0677	27.0105	27.2172	27.3128	27.2544	27.1649	27.3135	27.2364	27.3682	27.3019	27.2646	27.2882	27.3887
0.0476947	0.432493	A0A140TAB3;P37285	Kinesin light chain 1	Klc1	7	62.852	735860000	34	23.7295	23.8152	24.0889	22.5771	22.6714	22.6109	23.4701	22.5584	NaN	23.1216	23.3189	23.3195	22.87	22.5418	23.4144	NaN	NaN	NaN	NaN	23.0292	22.8164	NaN	NaN	NaN	24.0474	24.5281	24.1209	22.4815	NaN	NaN	22.7973	NaN	23.3176	23.5304	NaN	NaN	24.0074	23.6899	NaN	22.9312	NaN
0.694167	-0.0742877	A0A140TAB4;Q02874;B1WC28	Core histone macro-H2A.1	H2afy	6	39.07	475980000	35	NaN	NaN	23.3915	NaN	NaN	NaN	23.227	23.2442	23.0775	NaN	NaN	NaN	NaN	NaN	23.0569	23.2297	23.5567	NaN	23.6687	23.397	23.928	24.0116	23.818	23.6561	23.7359	NaN	NaN	NaN	24.0369	23.2544	NaN	23.151	23.3416	23.4534	NaN	23.3596	NaN	NaN	NaN	23.3008	22.8729
0.735151	-0.0409146	A0A140TAC3;O88339	Epsin-1	Epn1	7	60.228	728550000	23	NaN	23.6514	23.2637	23.5983	23.7548	23.6136	NaN	NaN	23.1938	23.8378	23.6736	23.7569	23.4844	23.4297	NaN	NaN	NaN	NaN	NaN	NaN	NaN	23.5865	23.5281	23.5714	23.3672	23.5463	23.7762	NaN	23.3612	23.3889	23.414	23.7028	23.6412	NaN	23.4541	NaN	NaN	NaN	NaN	NaN	23.2585
0.679715	-0.0246003	A0A140TAD1;Q6AY63	ADP-sugar pyrophosphatase	Nudt5	7	24.13	1392200000	66	24.3215	24.2224	24.3381	23.7227	23.5924	23.7204	24.2286	24.1986	24.1297	24.3484	24.3491	24.4929	24.2342	24.466	24.4731	24.8049	24.6521	24.783	24.1421	24.4613	24.2667	24.3899	24.278	24.3641	24.3726	24.408	24.4193	NaN	24.262	NaN	24.4965	24.5927	24.6239	24.1147	24.0247	23.9577	24.2748	24.32	24.2315	24.0224	24.1205
1	NaN	A0A140TAE0			1	96.823	349600000	26	NaN	NaN	NaN	NaN	NaN	NaN	NaN	NaN	NaN	NaN	NaN	NaN	NaN	NaN	NaN	NaN	NaN	NaN	NaN	NaN	NaN	NaN	NaN	NaN	NaN	NaN	NaN	NaN	NaN	NaN	NaN	NaN	NaN	NaN	NaN	NaN	NaN	NaN	NaN	NaN	NaN
1	NaN	A0A140TAE6;Q9Z311	Trans-2-enoyl-CoA reductase, mitochondrial	Mecr	1	40.334	4708400	3	NaN	NaN	NaN	NaN	NaN	NaN	NaN	NaN	NaN	NaN	NaN	NaN	NaN	NaN	NaN	NaN	NaN	21.3015	NaN	NaN	NaN	NaN	NaN	NaN	NaN	NaN	NaN	NaN	NaN	NaN	NaN	NaN	NaN	NaN	NaN	NaN	NaN	NaN	NaN	NaN	NaN
0.312359	0.108655	A0A140TAF0;Q9QX08			5	32.994	325690000	19	NaN	NaN	NaN	NaN	NaN	NaN	NaN	22.9	23.007	NaN	NaN	NaN	NaN	NaN	NaN	NaN	NaN	NaN	NaN	NaN	NaN	NaN	NaN	NaN	NaN	NaN	NaN	NaN	NaN	NaN	NaN	NaN	NaN	NaN	NaN	23.1871	NaN	22.9987	NaN	NaN	NaN
1	NaN	Q5BJN4;A0A140TAF7;G3V9D0	Protein O-glucosyltransferase 1	Poglut1	1	41.426	109660000	5	NaN	NaN	NaN	NaN	NaN	NaN	NaN	NaN	NaN	NaN	NaN	NaN	NaN	NaN	NaN	NaN	NaN	NaN	NaN	NaN	NaN	NaN	NaN	NaN	NaN	NaN	NaN	NaN	NaN	NaN	NaN	NaN	NaN	NaN	NaN	NaN	NaN	NaN	NaN	NaN	NaN
0.766379	-0.0314772	A0A140TAH1;Q9JJ50	Hepatocyte growth factor-regulated tyrosine kinase substrate	Hgs	6	101.12	952230000	79	23.4604	23.4514	22.8982	23.1708	23.3138	22.9753	24.2119	23.6453	23.7106	24.3116	23.9473	23.9058	23.837	23.6368	23.2808	23.422	NaN	NaN	23.4147	23.4009	23.6362	23.3471	23.4783	22.8242	24.2053	23.9731	24.058	23.7821	23.778	23.3765	23.5187	23.5145	23.5086	24.0351	23.8257	23.7694	23.4081	23.5724	23.464	23.7974	23.6187
0.83486	0.0102008	A0A140TAH5;P84092	AP-2 complex subunit mu	Ap2m1	17	49.526	3370800000	365	25.4275	25.4356	25.5253	25.7208	25.8027	25.6412	25.5076	25.4867	25.5296	25.2844	25.2233	25.1675	25.5182	25.4683	25.4956	25.6368	26.0178	25.7435	25.4122	25.3542	25.3718	25.6533	25.6198	25.5843	25.5528	25.5076	25.6998	25.6084	25.6852	25.548	25.4309	25.6373	25.4847	25.492	25.4872	25.4906	25.6969	25.5174	25.6666	25.8689	25.7752
0.0302989	0.158972	A0A140TAI1;Q9JJP9	Ubiquilin-1	Ubqln1	12	62.014	1135800000	146	24.2393	24.1128	23.746	24.5176	24.7079	24.6235	23.8877	23.9829	23.8014	24.1967	24.097	24.2005	24.159	23.9757	23.9836	NaN	NaN	NaN	23.481	23.9005	23.5577	24.1011	23.9872	23.5224	23.8571	23.9699	24.0237	24.2145	24.2002	24.1166	23.7079	24.1061	NaN	23.736	23.7528	23.8418	23.8742	23.9761	23.6374	24.1011	24.0442
0.0433449	-0.238494	A0A140TAI6;D3ZZ95;F1M706;D4A1Q0;P39032;M0RCN1;D3ZJJ6	60S ribosomal protein L36	LOC100361060;LOC100360439;LOC100361644;Rpl36;LOC100361079;LOC100359616	6	12.254	1436500000	65	24.264	23.9177	24.1453	24.3166	NaN	NaN	24.3301	24.3608	24.4424	24.4963	23.8571	24.1871	24.0649	NaN	NaN	26.0773	25.9024	26.1881	24.6123	24.312	24.2224	25.3626	25.3019	24.9502	NaN	24.0005	23.8855	24.7684	24.3485	24.6839	24.5442	24.2101	24.1477	24.5845	24.8697	25.0205	24.3019	24.6101	24.3008	24.4228	23.4507
0.00597386	-0.233518	A0A140TAI8;B5DFN2	Adenosylhomocysteinase	Ahcyl1	4	52.895	926120000	100	23.7059	23.602	23.5264	24.3907	24.2062	23.9901	23.9174	24.016	24.0201	23.6339	23.8412	23.807	23.5945	23.9506	23.6699	NaN	NaN	NaN	24.0585	23.8921	24.21	23.6467	23.4392	23.4296	24.0269	23.9256	24.0193	23.603	23.4785	23.8451	23.8091	23.701	23.8485	23.779	23.3382	23.5766	23.5368	23.2832	23.5997	23.6689	23.7683
0.352864	0.0650583	A0A140TAJ3;Q32PX7	Far upstream element-binding protein 1	Fubp1	16	67.531	3017500000	501	25.2684	25.1178	25.2589	25.2368	25.1988	25.039	25.3038	25.4841	25.2186	25.3543	25.4852	25.4853	25.4192	25.4405	25.4183	25.8107	24.9727	25.1467	25.4135	25.3217	25.6926	25.2668	25.404	25.3428	25.7824	25.6281	25.4579	25.059	24.9384	25.021	25.5596	25.667	25.4579	25.5034	25.2909	25.3026	25.4965	25.5301	25.6407	25.3222	25.3334
1	NaN	A0A140TAJ4;A0A0G2KAA4			1	42.07	141230000	5	NaN	NaN	NaN	NaN	NaN	NaN	NaN	NaN	NaN	NaN	NaN	NaN	NaN	NaN	NaN	NaN	NaN	NaN	NaN	NaN	NaN	NaN	NaN	NaN	NaN	NaN	NaN	NaN	NaN	NaN	NaN	NaN	NaN	NaN	NaN	NaN	NaN	NaN	NaN	NaN	NaN
0.580179	-0.0969505	A0A140UHW6;Q5U4E4		Trmt1	5	69.372	126960000	36	NaN	21.082	NaN	NaN	NaN	NaN	21.7209	NaN	NaN	NaN	NaN	21.8393	NaN	NaN	21.5619	NaN	NaN	NaN	22.1673	NaN	21.785	NaN	NaN	21.3674	NaN	21.9155	NaN	NaN	21.4944	21.4268	21.7027	21.5254	21.6098	NaN	NaN	NaN	NaN	21.8564	NaN	21.5499	21.4197
0.696711	-0.0311114	D4A0U0;A0A140UHX0;P09215	Protein kinase C delta type;Protein kinase C delta type regulatory subunit;Protein kinase C delta type catalytic subunit	Prkcd	11	77.271	666360000	64	23.1959	23.0489	23.0252	23.3079	23.5953	23.6883	23.3627	23.4822	23.2693	23.2402	23.5475	23.3433	23.1491	23.0148	23.1486	23.3582	22.8918	23.8345	23.4676	23.1961	23.0902	23.1875	22.923	23.0636	23.4011	23.4816	23.5532	23.0713	23.017	23.0772	23.372	23.7401	22.8477	23.1773	22.8166	22.5777	23.0899	23.3475	23.2912	23.0949	23.1671
1	NaN	B2RYM6;A0A140UHX2		Zc3hc1	2	55.324	457320000	4	NaN	NaN	NaN	NaN	NaN	NaN	NaN	NaN	NaN	NaN	NaN	NaN	NaN	NaN	NaN	NaN	NaN	NaN	NaN	NaN	22.9276	NaN	NaN	NaN	NaN	NaN	NaN	NaN	NaN	NaN	NaN	NaN	NaN	NaN	NaN	NaN	NaN	NaN	NaN	NaN	NaN
1	NaN	A0A142BM04;A0A0G2JW41			1	22.31	22037000	1	NaN	NaN	NaN	NaN	NaN	NaN	NaN	NaN	NaN	NaN	NaN	NaN	NaN	NaN	NaN	NaN	NaN	NaN	NaN	NaN	NaN	NaN	NaN	NaN	NaN	NaN	NaN	NaN	NaN	NaN	NaN	NaN	NaN	NaN	NaN	NaN	NaN	NaN	21.0246	NaN	NaN
1	NaN	A0A1B0GWV3;Q498S4;A0A1B0GWL1;M0RB90;Q5EB99;F1LR47;P05178	Cytochrome P450 2C6	LOC293989;Cyp2c6v1;Cyp2c6	1	17.658	33417000	3	NaN	NaN	NaN	NaN	NaN	NaN	NaN	NaN	NaN	NaN	NaN	NaN	NaN	NaN	NaN	NaN	NaN	NaN	NaN	NaN	NaN	NaN	NaN	NaN	NaN	NaN	NaN	NaN	NaN	NaN	NaN	NaN	NaN	NaN	NaN	NaN	NaN	NaN	NaN	NaN	NaN
1	NaN	Q71SY3;Q7TP02;E9PT79;A0A1B0GWQ7		Tsn	5	26.171	542200000	36	NaN	NaN	NaN	NaN	NaN	NaN	NaN	NaN	NaN	NaN	NaN	NaN	NaN	NaN	NaN	NaN	NaN	NaN	NaN	NaN	NaN	NaN	23.0662	NaN	24.2703	NaN	24.4826	NaN	NaN	NaN	NaN	NaN	NaN	NaN	NaN	NaN	NaN	NaN	23.2929	NaN	NaN
1	NaN	B2RZA2;A0A1B0GWR1;M0R8C5		Eri3	1	32.569	35523000	8	NaN	NaN	NaN	NaN	NaN	NaN	NaN	NaN	NaN	NaN	NaN	NaN	NaN	NaN	NaN	NaN	NaN	NaN	NaN	NaN	NaN	NaN	NaN	NaN	NaN	NaN	NaN	NaN	NaN	NaN	NaN	NaN	NaN	NaN	NaN	NaN	NaN	NaN	NaN	NaN	NaN
1	NaN	A0A1B0GWW0;D3ZHB7		Ube3c	2	110.46	36331000	38	NaN	NaN	NaN	NaN	NaN	NaN	NaN	NaN	NaN	NaN	20.9101	NaN	NaN	NaN	NaN	NaN	NaN	NaN	NaN	NaN	NaN	NaN	NaN	NaN	NaN	NaN	NaN	NaN	NaN	NaN	NaN	NaN	NaN	NaN	NaN	NaN	NaN	NaN	NaN	NaN	NaN
0.814736	-0.0290122	A0A1K0FUA6;P11517;CON__Q3SX09;CON__P02070;O88752	Hemoglobin subunit beta-2		6	15.982	32606000000	225	28.5176	28.7864	28.6684	28.5846	28.657	28.7124	29.0723	28.8327	28.9885	28.6537	28.6214	28.7352	28.9661	28.7951	28.8075	27.6752	27.4127	27.4018	28.7704	28.7997	28.9018	28.8944	28.9858	28.8727	29.0117	28.797	28.8364	28.8937	28.7997	28.8551	28.2615	28.3263	28.4485	28.4891	28.5281	28.7222	28.8528	28.8635	28.8434	29.0534	29.1943
0.517362	-0.0945997	A0A1K0GY57;Q921A4	Cytoglobin	Cygb	6	21.496	551270000	82	23.3236	23.1875	23.1288	23.4804	23.1057	23.0625	23.0267	23.1359	23.4735	22.3738	22.4896	22.4493	22.9573	22.7044	22.9139	NaN	NaN	NaN	23.4368	23.1244	23.4154	22.9492	23.0486	22.9182	NaN	22.2231	NaN	22.7549	22.7038	NaN	23.0376	NaN	23.3318	23.0142	22.8088	23.243	23.6654	23.8201	23.6648	NaN	22.6646
1	NaN	B2GUU6;A0A1S7IVJ5;A0A1S7IVI8;A0A1S7IVI4;A0A1S7IVH9;A0A1S7IVH8;A0A1S7IVH6;A0A1S7IVH4;A0A1S7IVG9;Q6TEK4	Vitamin K epoxide reductase complex subunit 1	Vkorc1	1	17.783	239630000	3	NaN	NaN	NaN	NaN	NaN	NaN	NaN	NaN	NaN	NaN	NaN	NaN	NaN	NaN	NaN	NaN	NaN	NaN	NaN	NaN	NaN	NaN	NaN	NaN	NaN	NaN	NaN	NaN	NaN	NaN	NaN	NaN	NaN	NaN	NaN	NaN	NaN	NaN	NaN	NaN	NaN
0.497818	0.0627171	A0A1W2Q5Z6;Q4QQV1			3	13.735	1148400000	147	23.7843	23.9052	23.9904	23.875	24.3176	24.3853	24.2501	24.2088	24.3797	23.9705	24.2317	24.0528	24.1103	24.1227	24.1129	NaN	NaN	NaN	23.7298	23.7045	23.534	23.7557	24.1353	23.8553	23.9772	24.119	24.1279	23.8936	24.0946	23.9989	23.5761	23.4761	23.5316	23.7766	23.8059	23.7228	24.0212	23.8349	23.6899	24.0671	24.1268
0.0229246	0.148034	A0A1W2Q690;B0BNE2	DNA-directed RNA polymerases I, II, and III subunit RPABC1	Polr2e	4	23.13	293960000	11	NaN	21.9758	22.1017	21.8826	NaN	NaN	NaN	NaN	21.7982	21.7967	NaN	21.9684	22.2232	22.1174	21.979	NaN	NaN	NaN	22.0672	NaN	21.9433	21.9519	21.9632	22.1194	21.9302	NaN	NaN	21.5929	21.9026	21.9321	22.0194	NaN	NaN	22.021	NaN	22.2754	22.3735	22.141	22.1265	21.7969	21.8469
0.291137	-0.134906	D3ZF77;A0A387KC71		Akr1cl	20	37.194	8718700000	527	26.6647	26.6907	26.6596	26.379	26.5219	26.7336	26.9176	26.9055	26.9209	27.221	27.1875	27.1688	27.0117	26.941	26.7507	27.0974	27.4738	26.9751	26.3995	26.612	26.3492	26.6288	26.5326	26.5941	26.623	26.5904	26.5546	26.7363	26.7226	26.7464	26.6483	26.6098	26.5574	26.9595	27.0235	27.0081	27.1698	27.3365	27.2902	26.6303	26.6782
1	NaN	A0A3B0J380;P31720	Complement C1q subcomponent subunit A	C1qa	1	27.201	83286000	1	NaN	NaN	NaN	NaN	NaN	NaN	NaN	NaN	NaN	NaN	NaN	NaN	NaN	NaN	NaN	NaN	NaN	NaN	NaN	NaN	NaN	NaN	NaN	NaN	NaN	NaN	NaN	NaN	NaN	NaN	NaN	NaN	NaN	NaN	NaN	NaN	NaN	NaN	NaN	NaN	NaN
0.00195808	-0.204961	A0JN17;P08644;Q8CGQ3;V9GZL5	GTPase KRas;GTPase KRas, N-terminally processed	Kras	9	21.494	792130000	66	23.4314	23.5093	23.4855	23.5664	23.7232	23.7459	23.5049	23.82	23.8258	23.3724	23.4788	24.1274	23.1726	23.2886	23.3225	NaN	NaN	NaN	23.7969	23.3374	23.7609	23.7438	23.8885	23.8064	NaN	23.4334	NaN	23.7963	23.5232	NaN	23.6916	23.5735	23.615	23.5879	23.4214	NaN	23.4675	23.6651	23.3438	23.1531	23.2912
0.103158	-0.119139	A0JN30		Cnpy2	12	20.709	2866100000	238	25.0674	25.4721	25.4303	25.5779	25.5565	25.5299	25.6433	25.3434	25.3478	25.083	25.3125	25.3963	25.6195	25.2158	25.5378	25.0916	25.6353	25.8057	25.2974	25.8325	25.3879	25.285	25.1577	25.0372	25.2053	25.2669	25.1295	25.2244	25.3502	25.1622	25.4268	24.9943	25.1653	25.3581	25.0718	25.2456	25.0789	24.8774	25.2515	25.2641	25.131
0.473522	0.0363412	A0JPJ7;B1WC04	Obg-like ATPase 1	Ola1	12	44.535	2884700000	316	25.3745	25.3352	25.2362	25.4044	25.359	25.1041	25.4695	25.2068	25.1978	25.3043	25.2722	25.3774	25.3858	25.359	25.4264	24.6055	24.9828	24.3673	25.3473	25.4071	25.4138	25.3519	25.3937	25.3777	25.5238	25.6509	25.6579	25.4173	25.3952	25.5041	25.225	25.3428	25.3695	25.4153	25.3297	25.301	25.4681	25.2123	25.4078	25.4434	25.3781
0.0383241	0.178185	P97633;A0JPL2;D3ZRE3	Casein kinase I isoform alpha	Csnk1a1	10	37.495	1477700000	191	24.268	24.4298	23.9347	24.6027	24.8423	24.6645	24.0793	24.0613	24.444	24.4322	24.3053	24.3027	24.3859	24.2966	24.1828	NaN	NaN	NaN	24.3499	24.1623	24.2402	24.0443	23.7359	24.5572	24.8511	24.47	24.7096	24.7937	25.2631	23.7618	24.41	24.2061	24.6169	24.3549	24.2528	24.3926	24.3211	24.2311	23.979	24.6689	24.4499
0.446814	-0.0727732	A0JPM9	Eukaryotic translation initiation factor 3 subunit J	Eif3j	6	29.187	2897900000	86	25.0217	25.4423	25.0073	25.4414	25.62	25.5988	25.2723	25.6831	25.2033	25.3391	25.2424	25.5947	25.6217	25.4405	25.4608	NaN	NaN	NaN	25.1191	25.1506	24.9333	25.2574	25.4768	25.282	25.5546	25.5316	25.2013	25.2521	25.2729	25.3123	25.1044	25.3745	25.2348	24.9849	25.1998	24.8975	25.2813	24.861	25.2006	25.538	25.1275
1	NaN	A0JPN7;F1M3M6;A0A096MJQ0		Cstf3	2	69.265	79584000	45	NaN	NaN	NaN	NaN	NaN	NaN	NaN	NaN	NaN	NaN	NaN	NaN	NaN	NaN	NaN	NaN	NaN	NaN	NaN	NaN	NaN	NaN	NaN	NaN	NaN	NaN	NaN	NaN	NaN	NaN	NaN	NaN	NaN	NaN	NaN	NaN	NaN	NaN	NaN	21.3131	NaN
0.900631	0.00942701	P70645;A1A5L1;A0A096MJX0	Bleomycin hydrolase	Blmh;LOC100911400	15	52.322	2879100000	271	25.1952	25.2343	25.3228	25.4015	25.3826	25.6276	25.5035	25.4843	25.3587	25.2099	25.2988	25.322	25.2084	25.2417	25.217	25.0094	25.3773	24.9446	25.115	24.9163	25.2278	25.2268	25.1257	25.2423	25.395	25.3945	25.4035	25.5968	25.3817	25.3636	25.036	24.9716	24.7091	25.09	25.0606	25.2088	25.0727	25.1119	25.2719	25.5122	25.5386
0.0273977	0.13924	Q499Q4;A1A5L2;P38652;Q62752	Phosphoglucomutase-1	Pgm1	34	61.389	10829000000	888	27.1666	27.2868	27.2747	27.1324	27.1094	27.3793	27.2402	27.2524	27.2371	27.1026	27.1404	27.0716	27.2879	27.3246	27.3129	26.3333	26.0873	26.9325	27.0805	26.9544	26.9595	27.0603	27.0253	27.0386	27.4852	27.4976	27.4401	27.2791	27.092	27.1502	26.9792	26.9522	26.9853	27.2321	27.147	27.104	27.3231	27.291	27.3242	27.1985	27.176
1	NaN	A1A5R1;A0A249Y6E1;A0A0G2JYU0;A0A0G2JYY7;D3ZSL1	RNA binding protein fox-1 homolog 2;RNA binding protein fox-1 homolog	Rbfox2;Rbfox1	2	45.55	26619000	6	NaN	NaN	NaN	NaN	NaN	NaN	NaN	NaN	NaN	NaN	NaN	NaN	NaN	NaN	NaN	NaN	NaN	NaN	NaN	NaN	NaN	NaN	NaN	NaN	NaN	NaN	NaN	NaN	NaN	NaN	NaN	NaN	NaN	NaN	NaN	NaN	NaN	NaN	NaN	NaN	NaN
0.110207	0.206318	A1A5S1	Pre-mRNA-processing factor 6	Prpf6	7	106.76	386540000	53	22.7508	22.7165	22.4511	22.646	22.7583	22.5153	NaN	22.6508	22.6016	NaN	22.5376	22.9445	22.6159	22.7513	22.6323	NaN	NaN	NaN	22.7343	22.5099	22.5901	22.7018	22.9293	22.7223	23.7428	23.2322	23.0622	22.3667	NaN	22.231	NaN	NaN	NaN	22.7997	22.6137	22.5833	22.7048	22.6859	22.7493	22.7821	22.5257
0.505619	0.0633179	A1L108	Actin-related protein 2/3 complex subunit 5-like protein	Arpc5l	4	17.01	1137400000	107	23.8429	23.6801	24.2523	24.105	24.3551	24.4203	23.9987	23.8825	23.9608	23.9958	23.7323	23.8196	24.0507	23.9694	23.9155	NaN	NaN	NaN	NaN	24.0641	24.0547	24.1859	24.2574	24.2509	24.2937	24.4493	24.3608	24.0061	23.9387	23.9142	23.4273	24.0399	23.6413	23.6994	23.9645	23.9804	24.0491	23.9168	23.9816	24.3882	24.3915
0.103205	0.17209	A1L114;Q7TQ70;P06399;Q4G044	Fibrinogen alpha chain;Fibrinopeptide A;Fibrinogen alpha chain	Fga	10	60.504	2619200000	291	25.1746	25.11	25.2491	24.8517	24.8647	24.6568	25.1644	25.1327	25.1779	25.6664	25.6421	25.7547	25.409	25.4802	25.4574	NaN	24.6008	NaN	24.9464	24.8383	24.6821	24.9307	24.9505	25.0899	25.3313	25.3483	25.3941	24.6935	24.8362	24.7927	24.5623	24.5402	24.5544	24.8879	24.8866	25.0055	25.2634	25.1234	25.2437	25.1704	25.0493
0.67461	-0.0353942	A1L122;F1M7W7;Q9Z1A5	NEDD8-activating enzyme E1 regulatory subunit	Nae1	7	60.351	510340000	82	23.0495	23.1697	23.1438	23.0898	23.7609	23.3228	23.0165	23.2751	23.1552	22.6418	22.5306	22.9307	23.1052	23.1485	22.8613	NaN	NaN	NaN	22.7678	22.7383	22.5604	23.0196	22.9647	23.0403	22.9309	22.8113	22.7465	22.7213	22.737	23.1742	NaN	NaN	NaN	22.5864	22.989	22.9068	NaN	22.5278	NaN	23.0839	NaN
0.000769335	-0.286143	A1L1J8		Rab5b	4	23.674	1527200000	124	24.2954	24.6921	24.4531	24.8883	24.956	24.6557	24.3333	24.5996	24.573	24.1937	23.9425	24.0078	24.0853	24.2462	24.4476	23.9213	NaN	NaN	24.4183	24.4201	24.6976	24.5164	24.5677	24.478	24.0774	24.5805	24.4138	24.7005	24.907	24.911	24.575	24.5966	24.6931	24.3784	24.4011	24.5763	24.0315	24.0646	23.8144	24.7576	24.7546
0.912986	-0.00569216	A1L1M0;P27791	cAMP-dependent protein kinase catalytic subunit alpha	Prkaca	15	40.605	5865500000	341	26.1221	26.1085	26.1971	26.6092	26.53	26.5686	26.2732	26.324	26.2923	26.0379	26.2199	26.1222	26.1595	26.1821	26.263	26.4612	26.7357	25.8804	26.2134	26.1632	26.225	26.0209	26.1132	26.0542	26.4546	26.3894	26.5484	26.6362	26.6602	26.3182	26.2741	26.4313	26.409	26.112	26.3196	26.285	26.3969	26.3973	26.5767	26.4369	26.4766
1	-0.234138	F7F0B1;A2RRT6;Q8K3Y6	Zinc finger CCCH-type antiviral protein 1	Zc3hav1	8	110.81	194920000	28	NaN	NaN	NaN	NaN	NaN	NaN	NaN	NaN	NaN	NaN	22.3161	NaN	NaN	NaN	NaN	NaN	NaN	NaN	NaN	NaN	NaN	NaN	NaN	22.8111	22.6086	NaN	22.7726	NaN	NaN	NaN	NaN	NaN	NaN	NaN	NaN	NaN	NaN	NaN	NaN	NaN	22.7506
0.657972	0.0831643	A2RUW1;C9K104	Toll-interacting protein	Tollip;tollip	4	30.314	483710000	21	NaN	23.3002	22.5702	NaN	NaN	23.1876	22.7606	23.0367	22.6098	NaN	NaN	22.7378	NaN	22.8151	NaN	NaN	NaN	NaN	23.2291	NaN	NaN	NaN	NaN	NaN	NaN	NaN	NaN	22.8563	22.9526	23.1319	NaN	NaN	22.8482	NaN	NaN	NaN	22.8324	23.6165	23.4315	22.9773	22.7241
0.649103	0.0250502	A2VCW8;F1LMC7;A0A0G2JZT5;D4A0F5;Q9WVC0;Q7TP92;A0A0G2JV25	Septin-7	2007-09-01	23	50.678	11117000000	692	27.1566	27.0622	27.1288	27.5214	27.4268	27.3797	27.2621	27.175	27.2056	26.849	26.8584	26.8957	27.1559	27.2024	27.1435	27.107	27.2582	26.8129	27.1068	27.0924	27.0453	26.7347	26.8843	26.8174	27.3339	27.4398	27.4147	27.1956	27.246	27.1797	27.024	26.9159	27.0663	26.9983	26.9118	26.9573	27.2477	27.179	27.1157	27.2679	27.3234
1	NaN	A2VCX1	TIP41-like protein	Tiprl	3	31.224	291460000	6	NaN	NaN	NaN	NaN	NaN	NaN	NaN	NaN	NaN	NaN	NaN	NaN	NaN	NaN	NaN	NaN	NaN	NaN	NaN	NaN	NaN	NaN	NaN	NaN	NaN	NaN	NaN	NaN	NaN	NaN	NaN	NaN	NaN	NaN	NaN	NaN	22.5509	NaN	NaN	NaN	NaN
0.307734	-0.118379	A2VD09;Q9QZM5;F1LYA6;O35823	Abl interactor 1	Abi1	8	52.331	1750100000	83	24.4595	24.2982	24.1186	24.8004	25.3115	24.7549	24.2173	24.25	24.5139	24.3759	24.4633	24.4334	24.3898	24.3502	24.429	26.1625	25.9388	26.4758	24.894	24.2554	25.0204	24.7201	24.179	24.3514	24.261	24.1279	24.3184	24.3371	24.7025	24.4958	24.9595	24.7301	25.0517	25.3248	24.7651	24.4908	24.2682	24.4439	24.4538	24.5022	24.5882
0.286784	-0.181483	A2VD12	Pre-B-cell leukemia transcription factor-interacting protein 1	Pbxip1	14	80.275	1114000000	220	23.6015	23.645	23.7522	24.2344	24.0704	24.0396	24.0525	23.9261	24.0616	23.7163	23.6711	23.6801	23.8093	23.285	23.8843	24.574	24.6837	24.2671	23.3418	23.0259	22.9749	24.059	24.0651	23.6422	24.0047	23.7538	23.5781	23.743	23.3715	23.7842	23.4174	23.0658	NaN	23.8427	23.8583	23.4696	23.1779	23.8305	23.6137	23.9672	24.1429
0.433787	0.0644399	A3E0T0;A0A0G2K1Q9;Q9JMB3;Q9JMB2;G3V874		Epb41l3	20	96.951	2276100000	158	24.7504	24.7447	24.5183	24.9452	24.9032	24.6642	24.6994	24.7572	24.8874	24.8735	24.9046	25.0971	24.9945	24.7625	24.9376	26.0255	26.1338	25.7672	24.8542	24.8215	24.6671	24.7745	24.6531	25.0941	24.5643	24.6373	24.8342	25.1845	24.9485	25.1341	24.639	23.9961	24.357	24.8784	24.8634	24.6259	24.6576	24.4828	24.5961	25.2701	24.8204
0.618862	0.0940355	A4GW50;A0A0U1RRV1		Stk38l	4	53.758	226910000	58	NaN	NaN	NaN	22.5902	22.4865	NaN	NaN	NaN	NaN	NaN	NaN	NaN	21.8912	NaN	NaN	NaN	NaN	NaN	NaN	NaN	NaN	21.7397	21.9442	22.2664	NaN	NaN	NaN	22.5974	22.5301	NaN	NaN	22.0122	NaN	NaN	NaN	NaN	NaN	22.003	22.427	NaN	NaN
0.389527	-0.0919147	A4L9P7	Sister chromatid cohesion protein PDS5 homolog A	Pds5a	10	150.28	407520000	89	22.4915	22.4289	22.5278	23.1244	23.0037	22.8263	22.5902	22.4328	22.5496	22.6227	22.8155	22.7782	22.5401	22.6276	22.5152	NaN	NaN	NaN	22.883	23.1958	23.2701	22.5345	22.6738	22.0632	22.9081	22.7724	23.4157	NaN	22.4807	22.6016	22.8376	22.9339	22.9486	22.3873	22.3428	22.7105	23.1468	22.2159	22.7554	22.8054	22.7256
0.4306	0.060185	A5I9F0;Q9WUL3;A5HV10	Protein-tyrosine-phosphatase	Ptprk	5	162.18	178910000	31	NaN	NaN	21.5597	21.7997	21.8327	21.9487	21.6462	21.5035	NaN	21.6328	21.4936	21.6828	NaN	21.7086	NaN	NaN	NaN	NaN	NaN	NaN	21.845	NaN	NaN	NaN	21.6638	21.7993	NaN	NaN	NaN	NaN	NaN	NaN	NaN	NaN	21.6305	21.5602	NaN	21.7417	NaN	NaN	NaN
0.779596	0.0290529	A6Y857;P10688	Phosphoinositide phospholipase C;1-phosphatidylinositol 4,5-bisphosphate phosphodiesterase delta-1	Plcd1	12	88.444	1893800000	155	24.4273	24.7849	24.6855	24.6893	24.971	24.5286	24.8762	25.0866	24.8906	24.8711	24.8014	25.1008	24.5582	24.5688	24.5273	NaN	NaN	24.564	23.7291	24.3778	24.5047	24.4387	24.3587	24.1906	24.6564	24.8216	24.7289	24.989	24.7494	24.9349	24.8658	24.6228	24.3716	24.4588	24.6384	24.7261	24.9665	25.0068	25.0817	24.777	24.9009
0.559429	0.0497936	Q5JC29;E9PSY8;A7BFV9		Eps15	11	86.728	557710000	105	22.8994	22.9412	23.1709	23.1789	22.9402	23.1493	23.1786	22.9868	23.0282	23.0005	22.8959	22.7716	23.0194	23.1165	22.9136	NaN	NaN	NaN	23.0344	22.743	NaN	22.781	22.9445	22.8702	23.1136	23.1797	23.3321	22.6714	23.0826	23.2493	22.8716	22.8775	22.741	22.8167	22.8627	22.9941	23.3244	22.8719	22.532	23.0398	23.0811
1	NaN	A7LNF8;Q08680;O19445		RT1.A;LW2;RT1-Cl	1	35.574	25695000	5	NaN	NaN	NaN	NaN	NaN	NaN	NaN	NaN	NaN	NaN	NaN	NaN	NaN	NaN	NaN	NaN	NaN	NaN	NaN	NaN	NaN	NaN	NaN	NaN	NaN	NaN	NaN	NaN	NaN	NaN	NaN	NaN	NaN	NaN	NaN	NaN	NaN	NaN	NaN	NaN	NaN
1	NaN	A7VJC2	Heterogeneous nuclear ribonucleoproteins A2/B1	Hnrnpa2b1	1	37.477	31979000	2	NaN	NaN	NaN	NaN	NaN	NaN	NaN	NaN	NaN	NaN	NaN	NaN	NaN	NaN	NaN	NaN	NaN	24.1391	NaN	NaN	NaN	NaN	NaN	NaN	NaN	NaN	NaN	NaN	NaN	NaN	NaN	NaN	NaN	NaN	NaN	NaN	NaN	NaN	NaN	NaN	NaN
1	NaN	A8ASI9;Q9JLT6	BH3-interacting domain death agonist;BH3-interacting domain death agonist p15;BH3-interacting domain death agonist p13;BH3-interacting domain death agonist p11	Bid	2	22.249	261570000	12	NaN	NaN	NaN	NaN	NaN	NaN	NaN	NaN	NaN	NaN	NaN	NaN	NaN	NaN	NaN	NaN	NaN	NaN	NaN	NaN	NaN	NaN	NaN	NaN	NaN	NaN	NaN	NaN	NaN	NaN	NaN	NaN	NaN	NaN	NaN	NaN	NaN	NaN	NaN	NaN	NaN
0.380599	0.154711	A8IRI3;P06536;G3V7U9;B3F210;Q7TSX7;E9PT44	Glucocorticoid receptor	gr;Nr3c1	3	87.603	95633000	52	NaN	20.869	NaN	NaN	NaN	NaN	NaN	NaN	20.8275	NaN	21.0447	20.98	21.3763	21.2631	21.5111	NaN	NaN	NaN	NaN	NaN	NaN	21.0818	NaN	NaN	NaN	NaN	NaN	NaN	NaN	NaN	NaN	NaN	NaN	NaN	NaN	NaN	NaN	NaN	NaN	20.6983	20.4774
0.244443	-0.0516899	A9CMB7;P15178	Aspartate--tRNA ligase, cytoplasmic	Dars	29	57.126	7260900000	691	26.5421	26.4715	26.6277	26.8353	26.7859	26.8971	26.6861	26.6192	26.6714	26.6812	26.695	26.715	26.7279	26.676	26.7035	24.7801	24.9587	26.1284	26.9263	26.8427	26.8011	26.6542	26.7294	26.7554	26.9226	26.8525	26.8876	26.5183	26.438	26.6749	26.6898	26.6703	26.6652	26.5609	26.4119	26.4094	26.8118	26.7082	26.7686	26.8129	26.6792
0.494775	-0.0660351	A9CMB8;A9CMC9;Q62724	DNA helicase;DNA replication licensing factor MCM6	Mcm6	11	92.814	368320000	120	22.5065	NaN	22.749	22.5417	22.4838	22.4783	22.4751	22.2793	22.4159	22.1975	22.6123	22.8793	22.2314	22.2754	22.4031	NaN	NaN	NaN	22.4311	NaN	NaN	22.8357	22.4639	22.9127	22.5844	21.8986	22.155	21.7395	NaN	22.2759	22.2277	NaN	22.7998	21.8984	22.3701	22.1303	22.2798	22.6211	NaN	22.4071	22.1539
1	NaN	A9CMC8;Q02401	Lactase-phlorizin hydrolase;Lactase;Phlorizin hydrolase	Lct	1	217.61	3847500000	8	NaN	NaN	NaN	NaN	NaN	NaN	NaN	NaN	NaN	NaN	NaN	NaN	NaN	NaN	NaN	NaN	NaN	NaN	NaN	NaN	NaN	NaN	NaN	NaN	NaN	NaN	NaN	NaN	NaN	NaN	NaN	NaN	NaN	NaN	NaN	NaN	NaN	NaN	NaN	NaN	NaN
1	NaN	Q5M891;A9CME3;Q63514	C4b-binding protein alpha chain	C4bpa	1	67.201	10121000	2	NaN	NaN	NaN	NaN	NaN	NaN	NaN	NaN	NaN	NaN	NaN	NaN	NaN	NaN	NaN	NaN	NaN	NaN	NaN	NaN	NaN	NaN	NaN	NaN	NaN	NaN	NaN	NaN	NaN	NaN	NaN	NaN	NaN	NaN	NaN	NaN	NaN	NaN	NaN	NaN	NaN
0.894629	-0.101382	A9LNM8	cGMP-dependent protein kinase	Prkg1	8	76.369	2474000000	29	23.8259	23.9717	24.2576	25.3859	24.8547	25.1349	NaN	NaN	NaN	NaN	NaN	NaN	25.1185	NaN	NaN	NaN	NaN	NaN	NaN	27.6761	28.4038	NaN	24.931	NaN	27.0113	27.7986	27.6864	24.1887	24.8736	24.7597	24.268	24.3361	24.5231	NaN	NaN	NaN	NaN	NaN	NaN	25.2729	25.0168
1	NaN	A9UMV7		Uqcr11	1	6.5386	117860000	7	NaN	NaN	NaN	NaN	NaN	NaN	NaN	NaN	NaN	NaN	NaN	NaN	NaN	NaN	NaN	NaN	NaN	NaN	NaN	NaN	NaN	NaN	NaN	NaN	NaN	NaN	NaN	NaN	NaN	NaN	NaN	NaN	NaN	NaN	NaN	NaN	NaN	NaN	NaN	NaN	NaN
0.910187	-0.0114214	A9UMV9		Ndufa7l	6	12.5	409430000	66	22.5801	22.5519	22.6854	21.3311	22.4263	NaN	22.3703	22.3273	22.598	22.8453	22.4953	22.578	22.3647	22.5216	22.4545	23.9304	24.0572	24.2768	22.7222	22.7192	22.6421	22.6354	22.381	22.6379	NaN	22.2634	22.2449	21.7367	21.617	21.9996	NaN	23.1981	22.3222	23.3184	23.2384	22.9932	22.8379	22.9811	22.4964	22.5846	NaN
1	NaN	A9UMW0		Ubl5	3	8.5468	239940000	3	NaN	NaN	NaN	NaN	NaN	NaN	NaN	NaN	NaN	NaN	NaN	NaN	NaN	NaN	NaN	NaN	NaN	NaN	NaN	NaN	NaN	NaN	NaN	NaN	NaN	NaN	NaN	NaN	NaN	NaN	NaN	NaN	NaN	NaN	NaN	NaN	NaN	NaN	NaN	NaN	NaN
1	-0.042449	A9UMW1;P14942	Glutathione S-transferase;Glutathione S-transferase alpha-4	Gsta4	2	25.51	371990000	17	NaN	22.1501	NaN	NaN	NaN	NaN	NaN	NaN	NaN	22.7683	NaN	NaN	NaN	22.6123	NaN	NaN	NaN	23.9547	NaN	NaN	NaN	NaN	NaN	NaN	NaN	NaN	NaN	NaN	NaN	NaN	NaN	NaN	NaN	22.7749	NaN	NaN	22.8484	NaN	22.7833	NaN	NaN
0.885558	-0.0527738	B0BMS8;Q64122	Myosin regulatory light polypeptide 9	Myl9	16	19.854	238260000000	1641	31.5786	31.4857	31.5033	32.1558	32.0711	32.1319	31.4367	31.5056	31.5288	31.9053	31.9152	31.8472	31.717	31.6624	31.8573	30.6189	30.5915	30.3641	31.0952	31.1264	31.0857	31.7424	31.6751	31.7409	31.6879	31.6517	31.6635	32.3404	32.3549	32.4371	30.9104	30.9548	30.9214	32.0986	32.1917	32.0562	29.2001	29.1504	29.21	32.0279	32.0361
0.166569	-0.086331	B0BMT6;Q7TP19;Q9Z0T0;A0A0G2K2B6	Thiopurine S-methyltransferase	Tpmt	16	27.691	4138800000	344	25.6985	25.5653	25.6842	26.029	26.128	26.0345	25.7545	25.6728	25.903	25.8399	25.8886	25.7084	25.838	25.6502	25.5738	25.7223	26.6404	25.626	26.0844	26.1855	26.1033	25.7433	25.75	25.6341	25.8906	26.1132	25.6101	25.7523	25.832	25.8323	25.7406	25.8381	25.792	25.5809	25.5804	25.5179	25.8293	25.7172	25.9348	26.0257	25.799
0.264778	0.103223	B0BMT9;Q7TP12		Sqrdl	42	50.201	52431000000	1652	29.4528	29.4631	29.4739	29.5852	29.6369	29.5666	29.4057	29.3922	29.342	29.6852	29.7275	29.6826	29.4678	29.4667	29.4727	29.0059	28.7941	28.9023	29.9364	29.9411	29.9427	29.7475	29.7669	29.8039	29.5855	29.6053	29.614	29.6883	29.6823	29.6308	29.7437	29.7646	29.7111	29.4014	29.4063	29.413	29.6795	29.6615	29.6196	29.8593	29.8125
1	NaN	B0BMU0;Q7TP89	Peptidyl-prolyl cis-trans isomerase E;Peptidyl-prolyl cis-trans isomerase	Ppie	2	33.369	51748000	2	NaN	NaN	NaN	NaN	NaN	NaN	NaN	NaN	NaN	NaN	NaN	NaN	NaN	NaN	NaN	NaN	NaN	NaN	NaN	NaN	NaN	NaN	NaN	NaN	NaN	NaN	NaN	NaN	NaN	NaN	NaN	NaN	NaN	NaN	NaN	NaN	NaN	NaN	NaN	NaN	NaN
1	NaN	B0BMU7		Elp5	1	35.618	0	4	NaN	NaN	NaN	NaN	NaN	NaN	NaN	NaN	NaN	NaN	NaN	NaN	NaN	NaN	NaN	NaN	NaN	NaN	NaN	NaN	NaN	NaN	NaN	NaN	NaN	NaN	NaN	NaN	NaN	NaN	NaN	NaN	NaN	NaN	NaN	NaN	NaN	NaN	NaN	NaN	NaN
0.0155134	0.390083	B0BMU8;Q80XX4	Musculoskeletal embryonic nuclear protein 1	Mustn1	5	8.9851	974280000	114	24.0632	23.9145	23.7186	22.2744	22.5233	21.981	22.8488	22.7189	23.1303	23.4161	23.6311	23.6976	23.8341	23.8413	23.4136	25.1339	25.1003	24.9961	NaN	23.2653	23.3092	23.8935	23.6998	24.0935	24.0306	23.989	24.1456	22.6632	23.3399	23.3581	NaN	NaN	NaN	24.1661	24.0968	24.1833	24.3076	24.0523	23.9281	NaN	22.1841
0.770832	0.0402225	B0BMV5;P70550;Q9QYT8;Q6P9W6;Q63941	Ras-related protein Rab-8B	Rab8b	2	23.603	210470000	55	21.6163	21.7062	21.8617	NaN	NaN	NaN	21.9699	22.0531	21.9944	21.8223	21.8722	NaN	21.8774	21.4517	21.9227	22.9143	22.7869	22.4016	21.3523	21.4804	21.1686	21.6463	21.525	21.6351	21.6273	22.1581	21.6775	21.4079	21.3095	NaN	NaN	21.4948	NaN	22.3021	21.9915	22.1799	22.2144	22.433	22.1723	19.9223	NaN
0.0029459	-0.279111	B0BMV8;Q920D2	Dihydrofolate reductase	Dhfr	7	21.638	1786500000	93	24.2818	24.5664	24.309	24.0042	NaN	24.9993	24.5943	24.7879	24.682	24.4273	24.6277	24.5332	24.3693	24.4497	24.8654	24.4819	24.6209	24.8323	25.015	24.8592	24.9367	24.4849	24.316	24.7361	24.1605	24.4176	24.6942	25.0742	25.0049	24.852	24.8604	24.8645	24.877	24.5034	24.5337	24.5894	24.8154	24.4783	24.497	24.9744	25.1297
0.0189548	-0.129057	P61107;B0BMW0;A0A1B0GWR3	Ras-related protein Rab-14	Rab14	16	23.927	6072400000	371	26.4158	26.3607	26.3368	26.7806	26.7689	26.7771	26.3904	26.4226	26.4636	26.2784	26.3798	26.3917	26.1412	26.2127	26.2515	27.1803	27.3183	27.0565	26.6221	26.7632	26.7604	26.3664	26.1899	26.3867	26.3444	26.3078	26.2534	26.5104	26.3695	26.454	26.4256	26.3582	26.398	26.0367	26.1501	26.1408	26.3546	26.3434	26.3687	26.437	26.5567
0.000621902	-0.155585	B0BMW2;O70351	3-hydroxyacyl-CoA dehydrogenase type-2	Hsd17b10	23	27.249	21901000000	1102	28.0877	28.0712	28.0675	28.458	28.4571	28.4165	28.3002	28.2035	28.1805	28.1926	28.1966	28.2778	28.0929	28.1478	28.083	28.6854	28.6072	28.5886	28.412	28.4803	28.4501	28.3341	28.38	28.3886	28.2331	28.2512	28.2225	28.3557	28.3547	28.3015	28.4546	28.324	28.395	28.2498	28.2455	28.2303	28.1863	28.2059	28.2486	28.2305	28.3537
0.158123	-0.133339	B0BMW4;P63095;B4F771;Q63803;M0R9J4;Q9JLG1	Guanine nucleotide-binding protein G(s) subunit alpha isoforms short;Guanine nucleotide-binding protein G(s) subunit alpha isoforms XLas	Gnas	10	45.663	866950000	41	23.5635	23.8514	23.6297	24.0402	23.9583	24.056	23.5874	NaN	NaN	NaN	23.4162	23.8595	23.6199	23.5275	23.5048	NaN	NaN	NaN	23.7213	23.6667	23.7411	24.2028	23.4251	23.7974	23.5986	NaN	23.3366	24.3533	24.1135	23.7032	23.5972	23.2463	NaN	23.6743	23.9739	23.301	NaN	23.829	23.1923	NaN	24.0455
0.0110852	-0.23014	B0BMX3		S100a16	8	14.224	1838300000	204	24.8378	24.7423	24.721	25.15	24.6375	25.2802	24.7091	24.6181	24.6193	24.9271	25.0732	25.0308	24.9426	24.993	24.7924	24.7125	24.8299	24.7302	25.0148	25.0172	25.077	24.4981	24.3794	24.3901	24.2721	24.2141	24.3456	23.9949	24.4403	24.0022	25.0417	24.9331	25.1159	24.6797	24.7541	24.6967	24.7992	24.3869	24.5354	24.4852	24.0637
0.00123734	-0.290912	B0BMY2;Q5U211	Sorting nexin-3	LOC684097;Snx3	9	15.207	2937400000	97	24.8577	24.9285	24.8944	25.419	25.5783	25.6218	24.8888	25.0857	24.8828	24.9703	24.9971	25.4241	24.9772	24.8019	24.8374	26.7723	26.8601	26.8459	25.4197	25.4498	25.6084	24.9376	25.1272	24.6793	25.0092	25.1779	25.4607	25.3804	25.3236	25.4696	25.0903	25.1439	25.3432	24.739	24.6194	24.9832	24.9282	25.2449	24.9898	24.8025	25.2037
1	NaN	B0BMY7		Twf2	2	39.472	85090000	8	NaN	NaN	NaN	NaN	NaN	NaN	NaN	NaN	NaN	NaN	NaN	NaN	NaN	NaN	NaN	NaN	NaN	NaN	NaN	NaN	NaN	NaN	NaN	NaN	NaN	NaN	NaN	NaN	NaN	NaN	NaN	NaN	NaN	NaN	NaN	NaN	NaN	NaN	NaN	NaN	NaN
1	NaN	M0R549;B0BMZ1		LOC685881;RGD1305587	1	13.163	202540000	12	NaN	NaN	NaN	NaN	NaN	NaN	NaN	NaN	NaN	NaN	NaN	NaN	NaN	NaN	NaN	NaN	NaN	NaN	NaN	NaN	NaN	NaN	NaN	NaN	NaN	NaN	NaN	NaN	NaN	NaN	NaN	NaN	NaN	NaN	NaN	NaN	NaN	NaN	NaN	NaN	NaN
0.379985	-0.0815324	B0BN18	Prefoldin subunit 2	Pfdn2	6	16.58	1336500000	86	24.1429	24.1625	24.2167	24.2703	24.2531	24.3212	24.059	24.4463	24.1687	24.2618	24.3263	24.4594	23.9222	24.2734	24.082	23.9827	23.8699	24.09	24.285	24.4113	24.4314	24.0435	24.1296	24.0777	24.5188	24.1806	24.172	24.2987	24.0131	24.0429	24.1331	24.5585	23.3488	23.9436	23.9512	24.1775	24.1527	24.2013	24.1596	24.1765	24.4554
1	NaN	M0R749;B0BN23	Tetraspanin	Tspan15	2	32.82	122410000	8	NaN	NaN	NaN	NaN	NaN	NaN	NaN	NaN	NaN	NaN	NaN	NaN	NaN	NaN	NaN	NaN	NaN	NaN	NaN	NaN	NaN	NaN	NaN	NaN	NaN	NaN	NaN	NaN	NaN	NaN	NaN	NaN	NaN	NaN	NaN	NaN	NaN	NaN	NaN	NaN	NaN
0.00730993	0.293554	B0BN46		Grhpr	7	35.937	1417300000	131	24.4934	24.3795	24.3942	NaN	24.0761	24.6312	24.0747	24.2308	24.2903	24.0658	24.0722	24.1516	24.468	24.5626	24.4552	NaN	NaN	NaN	23.9438	23.7513	23.8749	24.668	24.1264	24.3955	24.5926	24.2893	24.4982	24.6387	24.4754	24.462	24.1635	23.8617	23.9878	24.041	24.2204	24.0021	24.2465	24.3329	24.3878	24.6933	24.5971
0.000207725	-0.280241	B0BN55;P32362	Uroporphyrinogen decarboxylase	Urod	9	40.582	1389000000	258	24.2559	24.0429	24.2585	24.8245	24.6754	24.6648	24.2455	24.4496	24.41	24.5335	24.4978	24.4166	24.3828	24.3768	24.0345	NaN	NaN	NaN	24.3356	24.541	24.377	24.3808	24.4877	24.5159	24.1703	23.8935	24.1585	24.5978	24.5499	24.4636	24.4737	24.8734	24.5026	24.3224	24.2336	24.2402	24.262	24.2521	24.1858	24.5795	24.508
1	NaN	B0BN59;G3V6B8		RGD1562416;Tsr2	2	20.801	179730000	2	NaN	NaN	NaN	NaN	NaN	NaN	NaN	NaN	NaN	NaN	NaN	NaN	NaN	NaN	NaN	NaN	NaN	NaN	NaN	NaN	NaN	NaN	NaN	NaN	NaN	NaN	NaN	NaN	NaN	NaN	NaN	NaN	NaN	NaN	NaN	NaN	NaN	NaN	NaN	NaN	NaN
0.235892	0.130412	B0BN63		Ahsa1	9	38.104	1878000000	149	24.3762	24.7498	24.5027	25.0648	25.0746	24.9035	24.7799	24.648	24.4629	24.6719	24.5727	24.693	24.6613	24.8333	24.892	NaN	NaN	NaN	24.2113	24.4196	24.1369	25.0532	24.8127	24.7913	24.7361	24.8625	24.9765	24.7022	24.8026	25.3488	24.4702	24.173	24.1111	24.6085	24.8734	24.8043	24.2119	24.4427	24.5953	24.9556	25.0134
1	NaN	B0BN65		Fam49a	2	37.328	27153000	9	NaN	NaN	NaN	NaN	NaN	NaN	NaN	NaN	NaN	NaN	NaN	NaN	NaN	NaN	NaN	NaN	NaN	NaN	NaN	NaN	NaN	NaN	NaN	NaN	NaN	NaN	NaN	NaN	NaN	NaN	NaN	NaN	NaN	NaN	NaN	NaN	NaN	NaN	NaN	NaN	NaN
1	0.49922	Q5I0K4;B0BN68		Mrps9	4	39.392	286880000	14	NaN	NaN	NaN	NaN	NaN	NaN	NaN	NaN	NaN	22.3302	22.3148	22.3899	NaN	NaN	22.3442	NaN	NaN	NaN	NaN	NaN	NaN	NaN	NaN	NaN	NaN	NaN	NaN	NaN	NaN	NaN	NaN	NaN	NaN	NaN	22.1478	22.2902	NaN	NaN	NaN	NaN	NaN
0.122718	-0.166933	B0BN74;F1LQH9		Bag2	9	23.575	1802000000	104	24.4477	24.3539	24.3021	25.0878	25.1808	25.225	24.6764	24.5762	24.3704	24.4754	24.3226	24.3591	24.1115	24.3084	24.5997	NaN	NaN	NaN	24.1944	24.6159	24.4595	24.2918	24.0219	24.1568	24.8725	24.6075	24.749	24.9638	24.9293	25.1255	24.4296	24.2653	24.0212	24.7362	24.8618	24.6131	24.0988	24.3022	24.2869	24.9342	24.9757
0.07449	0.100595	B0BN81;P24050;A0A0G2K200	40S ribosomal protein S5;40S ribosomal protein S5, N-terminally processed	Rps5	19	22.906	22656000000	691	28.3505	28.1739	28.2278	28.3142	28.4086	28.5608	28.1654	28.1786	28.1882	28.3063	28.3063	28.3955	28.4476	28.405	28.3017	28.8318	28.6358	28.6538	28.186	28.3788	28.4343	28.1502	28.2714	28.2412	28.6226	28.6261	28.5168	27.8975	27.971	27.826	28.3788	28.3444	28.4572	28.2052	28.225	28.3047	28.3577	28.4422	28.4825	28.4083	28.4941
1	NaN	B0BN83	Armadillo repeat-containing protein 1	Armc1	3	31.204	347890000	3	NaN	NaN	NaN	NaN	NaN	NaN	NaN	NaN	NaN	NaN	NaN	NaN	NaN	NaN	NaN	NaN	NaN	NaN	NaN	NaN	NaN	NaN	NaN	NaN	NaN	NaN	NaN	NaN	NaN	NaN	NaN	NaN	NaN	NaN	NaN	NaN	NaN	NaN	NaN	NaN	NaN
0.88632	-0.0137957	B0BN85;Q7TQ12;F1LMY6	Suppressor of G2 allele of SKP1 homolog	Sugt1	8	38.09	784290000	97	23.3484	23.2008	23.1311	23.3594	23.6795	23.3425	23.2763	23.3935	23.6977	23.278	23.2357	23.2097	23.5495	23.4325	23.3643	NaN	NaN	NaN	22.913	22.9224	23.298	23.4221	23.3627	23.885	23.6488	23.8485	23.655	23.1333	23.5075	23.3685	23.3135	23.4282	23.5292	23.3605	23.1049	23.5951	23.151	23.5432	23.4908	23.4558	23.3079
0.640946	-0.0275159	B0BN93	26S proteasome non-ATPase regulatory subunit 13	Psmd13	17	42.817	4626400000	344	25.846	25.8134	25.8584	26.2517	26.2545	26.1524	26.0386	25.7966	26.0485	25.9947	26.1108	26.0205	25.9618	25.88	25.9049	25.9667	NaN	NaN	26.175	26.3965	26.1878	25.8715	25.8752	25.9771	26.1908	26.2843	26.276	25.9506	25.9969	26.1366	26.0289	25.968	25.8655	25.965	25.7386	25.8177	26.0826	26.2221	26.0754	26.0662	26.014
1	NaN	B0BN94	Protein FAM136A	Fam136a	4	15.625	465120000	9	NaN	NaN	NaN	NaN	NaN	NaN	NaN	NaN	NaN	NaN	NaN	NaN	NaN	NaN	NaN	NaN	NaN	23.2912	NaN	NaN	NaN	NaN	NaN	NaN	NaN	NaN	NaN	NaN	NaN	NaN	NaN	NaN	NaN	NaN	NaN	NaN	NaN	NaN	NaN	NaN	NaN
0.000702747	-0.194105	B0BN97;Q498E0	Thioredoxin domain-containing protein 12	Txndc12	6	22.352	679840000	78	23.3055	23.0806	23.0528	23.4608	23.5329	23.5464	23.1813	23.2545	23.3737	22.9818	23.7079	23.2049	23.2737	23.1469	23.3762	NaN	NaN	NaN	23.51	23.5884	23.6023	23.3164	23.4052	23.342	23.1887	22.9556	23.1131	23.2562	23.2076	23.3211	23.1949	23.2623	23.4595	22.8148	23.3291	23.1981	23.3244	23.1162	23.2298	23.4629	23.3396
1	NaN	B0BN99		Hmgb3	1	22.985	119610000	20	NaN	NaN	NaN	NaN	NaN	NaN	NaN	NaN	NaN	NaN	NaN	NaN	NaN	NaN	NaN	NaN	NaN	NaN	NaN	NaN	NaN	NaN	NaN	NaN	NaN	NaN	NaN	NaN	NaN	NaN	NaN	NaN	NaN	NaN	NaN	NaN	NaN	NaN	NaN	NaN	NaN
1	NaN	F7FFR1;B0BNA3		Rars2	2	65.228	2504100	8	NaN	NaN	NaN	NaN	NaN	NaN	NaN	NaN	NaN	NaN	NaN	NaN	NaN	NaN	NaN	NaN	NaN	NaN	21.2574	NaN	NaN	NaN	NaN	NaN	NaN	NaN	NaN	NaN	NaN	NaN	NaN	NaN	NaN	NaN	NaN	NaN	NaN	NaN	NaN	NaN	NaN
0.0168002	0.148029	B0BNA7;M0RCH0	Eukaryotic translation initiation factor 3 subunit I	Eif3i	15	36.46	3770100000	389	25.5528	25.4015	25.3781	25.3387	25.2493	25.1349	25.4851	25.4454	25.4431	25.7865	25.942	25.8351	25.6116	25.58	25.6697	25.9665	25.4196	25.9566	25.3088	25.451	25.4833	25.4833	25.5293	25.5118	25.7685	25.7246	25.906	24.8364	24.8147	24.9763	25.5389	25.5751	25.4352	25.609	25.5418	25.329	25.9571	25.8751	25.9296	25.2581	25.1565
1	NaN	B0BNB0		Golt1b	1	15.393	110000000	33	NaN	NaN	NaN	NaN	NaN	NaN	NaN	NaN	NaN	NaN	NaN	NaN	NaN	NaN	NaN	NaN	NaN	NaN	NaN	NaN	NaN	NaN	NaN	NaN	NaN	NaN	NaN	NaN	NaN	NaN	NaN	NaN	NaN	NaN	NaN	NaN	NaN	NaN	NaN	NaN	NaN
1	NaN	B0BNB2;D3ZU54	Density-regulated protein	Denr	3	21.748	111510000	19	NaN	NaN	NaN	NaN	NaN	NaN	NaN	NaN	NaN	NaN	NaN	21.1467	NaN	NaN	21.6407	NaN	NaN	NaN	NaN	NaN	NaN	NaN	NaN	NaN	NaN	NaN	21.8016	NaN	NaN	NaN	NaN	NaN	NaN	NaN	NaN	NaN	NaN	NaN	NaN	NaN	NaN
1	NaN	M0R9Y3;B0BNB5		Nup43	2	38.906	162140000	4	NaN	22.1654	NaN	NaN	NaN	NaN	NaN	NaN	NaN	21.521	21.9147	21.6917	NaN	NaN	NaN	NaN	NaN	NaN	NaN	NaN	NaN	NaN	NaN	NaN	NaN	NaN	NaN	NaN	NaN	NaN	NaN	NaN	NaN	NaN	NaN	NaN	NaN	NaN	NaN	NaN	NaN
0.590554	-0.105225	B0BNB8		Calml4	5	17.728	470940000	23	NaN	NaN	22.9554	NaN	NaN	NaN	NaN	NaN	NaN	23.1319	23.2081	23.2743	22.7247	NaN	NaN	NaN	NaN	NaN	NaN	NaN	NaN	23.0414	23.0471	22.9703	NaN	NaN	NaN	NaN	NaN	NaN	NaN	NaN	NaN	NaN	NaN	NaN	NaN	NaN	NaN	NaN	NaN
0.386004	-0.088342	B0BNB9		Htra2	3	49.094	188790000	16	22.3795	NaN	NaN	22.594	22.5935	22.6697	NaN	NaN	NaN	NaN	NaN	NaN	NaN	NaN	NaN	NaN	NaN	NaN	NaN	NaN	NaN	22.2555	NaN	22.4114	NaN	22.2909	NaN	22.3675	22.1798	22.3072	22.3101	22.526	22.4346	NaN	NaN	NaN	NaN	NaN	NaN	22.6389	22.4499
0.0221412	-0.336873	B0BNE6		Ndufs8	6	23.97	2181100000	171	24.8472	24.8504	24.8308	25.6604	25.6587	25.5701	25.0861	25.0907	25.1304	25.1178	25.0214	25.0141	24.616	24.6551	24.5919	25.7884	24.7098	25.4161	25.461	25.4479	25.6045	25.1469	25.1667	25.1229	24.3582	24.3916	24.0044	25.3532	25.248	25.3069	25.3525	25.2101	25.3571	25.0617	24.9289	24.7813	24.5943	24.4722	24.5507	25.0766	25.1481
1	0.0345058	B0BNF5;Q91XU1;A0A0G2JUS0;D4A2X0;F1LMH5;A0A0G2JXZ5	Protein quaking	Qk;Qki;LOC100910212	3	35.977	98115000	7	NaN	NaN	NaN	NaN	NaN	NaN	NaN	NaN	NaN	NaN	NaN	NaN	NaN	21.6553	NaN	NaN	NaN	NaN	NaN	NaN	NaN	NaN	NaN	NaN	NaN	NaN	NaN	NaN	NaN	NaN	NaN	NaN	NaN	NaN	NaN	NaN	NaN	NaN	NaN	NaN	NaN
0.000893367	-0.298471	B0BNG3		Lman2	9	40.392	1227700000	149	23.7528	23.6556	23.8557	24.1756	24.5866	24.2804	24.35	24.4473	24.1933	23.1502	23.2895	23.4331	24.069	23.8822	23.8763	24.2308	24.5977	24.6922	24.6706	24.6435	24.1245	24.2726	24.432	24.4595	23.6629	23.9774	23.9299	24.6062	24.2978	24.565	24.3425	24.3023	24.2417	24.071	24.0676	23.9141	23.7791	23.9662	24.2113	24.5275	24.0774
1	NaN	Q3B8R8;B0BNG7;D3ZKZ6		Nudt16l1;LOC688828	2	21.557	26841000	13	NaN	NaN	NaN	NaN	NaN	NaN	NaN	NaN	NaN	NaN	NaN	NaN	NaN	NaN	NaN	NaN	NaN	NaN	NaN	NaN	NaN	NaN	NaN	NaN	NaN	NaN	NaN	NaN	NaN	NaN	NaN	NaN	NaN	NaN	NaN	NaN	NaN	NaN	NaN	NaN	NaN
1	NaN	G3V8H7;B0BNI5	Olfactomedin-like protein 3	Olfml3	2	47.219	25449000	5	NaN	NaN	NaN	NaN	NaN	NaN	NaN	NaN	NaN	NaN	NaN	NaN	NaN	NaN	NaN	NaN	NaN	NaN	NaN	NaN	NaN	NaN	NaN	NaN	NaN	NaN	NaN	NaN	NaN	NaN	NaN	NaN	NaN	NaN	NaN	NaN	NaN	NaN	NaN	NaN	NaN
0.166008	-0.280702	B0BNI6		Slc25a35	3	32.491	264840000	17	NaN	NaN	NaN	NaN	NaN	NaN	NaN	NaN	22.7547	22.8981	NaN	NaN	NaN	NaN	NaN	NaN	NaN	NaN	23.3586	23.0883	23.2588	22.309	22.5187	22.794	NaN	NaN	NaN	NaN	NaN	22.6868	NaN	NaN	23.2267	22.4601	22.5014	NaN	23.3701	22.9549	22.4529	NaN	NaN
0.116784	-0.0584482	B0BNJ1		Sri	13	21.624	17385000000	666	27.8888	27.7972	27.7547	27.6682	27.4731	27.6642	27.8557	27.8681	27.8759	28.1501	28.0877	28.1774	27.8091	27.8643	27.8897	28.3619	28.2215	28.2339	28.0887	28.1633	27.9468	28.0863	28.0388	27.9487	27.8449	27.9482	27.854	27.6507	27.7206	27.623	27.9891	27.9972	28.0918	27.9952	27.9756	28.1392	27.8429	28.0246	27.8927	27.5712	27.5795
0.273117	-0.0992607	B0BNJ4		Ethe1	26	27.676	62601000000	1221	29.7801	29.6961	29.7955	29.2505	29.255	29.2171	29.8695	29.7782	29.8129	29.9783	30.0177	29.9606	29.6135	29.6392	29.7109	30.2231	30.2159	30.3398	30.3516	30.4424	30.3442	29.8407	29.9457	29.8673	29.584	29.6319	29.5953	29.7921	29.9481	29.942	29.8796	29.7941	29.8791	29.682	29.7383	29.6933	29.6515	29.6479	29.7811	29.9376	29.9021
0.959593	0.00554867	B0BNJ5;P69736	Endothelial differentiation-related factor 1	Edf1	4	16.369	215780000	33	NaN	NaN	NaN	NaN	NaN	NaN	NaN	NaN	NaN	NaN	NaN	21.9977	22.1429	22.185	22.0257	22.901	NaN	NaN	NaN	NaN	NaN	22.2121	NaN	NaN	NaN	NaN	NaN	21.3509	NaN	NaN	22.2655	NaN	21.9133	22.0641	NaN	22.0499	NaN	NaN	NaN	NaN	22.1074
1	NaN	E9PTF0;B0BNK0		Ddx49	1	54.245	635860000	17	NaN	NaN	NaN	NaN	NaN	NaN	NaN	NaN	NaN	NaN	NaN	NaN	NaN	NaN	NaN	NaN	NaN	NaN	NaN	NaN	NaN	NaN	NaN	NaN	NaN	NaN	NaN	NaN	NaN	NaN	NaN	NaN	NaN	NaN	NaN	NaN	NaN	NaN	NaN	NaN	NaN
0.295944	0.0443629	B0BNK1;Q6IN17		Rab5c	10	23.425	3667200000	377	25.6065	25.5663	25.6407	25.7014	25.7098	25.8472	25.6241	25.7182	25.6698	25.2692	25.3159	25.3235	25.4343	25.4051	25.4448	25.5843	25.4035	24.8253	25.6112	25.4	25.4645	25.7321	25.6523	25.7137	25.5237	25.4555	25.7188	25.8041	25.7973	25.9182	25.2565	25.3518	25.3439	25.5065	25.5583	25.66	25.4762	25.5199	25.5784	25.5824	25.5652
1	NaN	B0BNL2		LOC364561	6	18.332	756540000	86	NaN	NaN	NaN	NaN	NaN	NaN	NaN	NaN	NaN	NaN	NaN	NaN	NaN	NaN	NaN	24.3276	24.8025	24.7328	22.9164	23.7049	23.8672	NaN	NaN	NaN	NaN	NaN	NaN	NaN	NaN	NaN	23.6089	23.7621	23.8491	NaN	NaN	NaN	NaN	NaN	NaN	NaN	NaN
0.000102768	-0.247888	B0BNM1	NAD(P)H-hydrate epimerase	Apoa1bp	10	30.89	1654600000	152	24.2807	24.3239	24.5052	24.3004	24.8837	24.7782	24.4602	24.5843	24.551	24.518	24.5105	24.6253	24.4862	24.3406	24.4155	24.6883	24.4903	NaN	24.884	25.0155	24.8314	24.3088	24.5176	24.6113	24.7063	24.5031	24.3519	25.1103	25.1251	25.3699	24.6128	24.5955	24.6199	24.4342	24.2526	24.2794	24.2716	24.3026	24.3747	24.6723	24.7447
0.0463035	0.146566	M0R9L3;B0BNM3	Sorting nexin	Snx9	14	66.023	1382200000	169	24.0171	24.0428	24.4237	24.6446	24.6511	24.3437	24.0689	24.1417	23.8955	24.1142	23.9821	23.8787	24.4354	24.0619	24.1255	NaN	NaN	NaN	23.899	24.4275	24.024	24.0901	24.2315	24.2182	24.465	24.396	24.2996	NaN	24.6906	23.9543	24.1007	23.9554	24.0871	24.0583	23.7463	24.0272	24.1083	24.3082	24.2381	24.5359	24.2623
0.735431	0.453055	B0BNM9	Glycolipid transfer protein	GLTP	3	23.703	2246200000	76	NaN	NaN	NaN	NaN	NaN	NaN	NaN	NaN	28.1533	24.1374	24.1798	23.9314	NaN	NaN	NaN	NaN	NaN	NaN	24.7226	24.6453	24.8338	NaN	NaN	NaN	NaN	23.3266	28.1025	NaN	NaN	NaN	NaN	NaN	NaN	NaN	NaN	NaN	NaN	NaN	NaN	NaN	NaN
0.27528	0.193926	B0BNN3	Carbonic anhydrase 1	Ca1	24	28.299	557330000000	3102	33.2206	33.1854	33.176	31.5798	31.5472	31.4236	33.0226	33.0639	33.0464	32.9942	32.9788	32.9941	32.7824	32.8544	32.7827	30.8694	30.9691	31.1353	33.4601	33.4944	33.5946	33.286	33.2237	33.1756	33.3735	33.3439	33.3312	32.7303	32.7354	32.8485	33.3338	33.3601	33.4407	32.8311	32.8064	32.808	32.9751	33.0023	33.0208	32.8452	32.8862
0.00560958	-0.299539	B0K006;Q9Z1L1	Claudin;Claudin-7	Cldn7	3	22.431	1767300000	79	24.3597	24.3344	24.4167	25.574	25.477	25.7337	24.8721	24.7797	24.8581	24.7621	24.6702	24.7067	24.9628	24.8573	25.0362	24.2646	24.4715	24.5687	24.4257	24.397	24.5782	24.072	24.7817	24.726	24.0056	23.8585	24.0955	24.8293	24.6479	24.715	24.6622	24.7679	24.607	24.4183	24.6227	24.4039	24.3227	24.1241	24.2648	24.6583	24.6433
0.0327498	-0.209992	B0K008;B5DFN1;F1LWP8;D4AA70		Eif1;Eif1b	8	12.746	1770000000	95	24.159	24.2185	24.448	25.0079	24.7338	24.9219	24.346	24.5983	24.4909	24.6629	24.9617	24.7363	24.449	24.4126	24.4034	NaN	NaN	NaN	24.5057	24.4398	NaN	24.7794	24.924	24.6072	24.6642	24.621	24.5097	24.6938	24.8609	24.9126	24.5078	25.1913	25.0206	24.5065	24.7532	24.537	24.1837	24.071	24.2552	24.8658	24.7246
0.00191093	-0.288219	B0K010		Txndc17	9	14.092	2751500000	163	25.3316	25.2672	25.4115	25.9695	25.6208	25.6712	25.2647	25.7146	25.3714	25.4545	25.312	25.3752	25.6647	25.3374	25.3062	25.8229	25.7291	25.6311	25.755	25.7151	25.6965	24.9604	24.8932	25.0185	25.4216	25.5372	25.3981	25.4993	25.5147	25.3452	25.681	25.6662	25.5963	25.4117	25.3136	25.2781	24.9857	25.0386	25.203	25.4002	25.3177
1	NaN	B0K013		Coa4	2	10.208	166160000	50	NaN	NaN	NaN	22.0761	NaN	NaN	NaN	NaN	NaN	NaN	NaN	NaN	NaN	NaN	NaN	NaN	NaN	NaN	NaN	NaN	NaN	22.0742	NaN	NaN	NaN	NaN	NaN	NaN	NaN	NaN	NaN	NaN	NaN	NaN	NaN	NaN	NaN	NaN	NaN	NaN	NaN
1	NaN	B0K014	D-tyrosyl-tRNA(Tyr) deacylase	Dtd1	1	23.394	136770000	53	NaN	NaN	NaN	NaN	NaN	NaN	NaN	NaN	NaN	NaN	NaN	NaN	NaN	NaN	NaN	NaN	NaN	NaN	NaN	NaN	NaN	NaN	NaN	NaN	NaN	NaN	NaN	NaN	NaN	NaN	NaN	NaN	NaN	NaN	NaN	NaN	NaN	NaN	NaN	NaN	NaN
1	NaN	B0K015		Commd8	1	20.767	108290000	28	NaN	NaN	NaN	NaN	NaN	NaN	NaN	NaN	NaN	NaN	NaN	NaN	NaN	NaN	NaN	NaN	NaN	NaN	NaN	NaN	NaN	NaN	NaN	NaN	NaN	NaN	NaN	NaN	NaN	NaN	NaN	NaN	NaN	NaN	NaN	NaN	NaN	NaN	NaN	NaN	NaN
0.612652	-0.0692782	B0K017		Adprhl2	5	39.375	394880000	64	22.6301	NaN	22.6734	22.2983	22.6045	23.0535	NaN	22.8218	22.9829	NaN	22.4892	22.5739	NaN	22.9038	22.8484	NaN	NaN	NaN	22.809	22.4907	NaN	22.1824	22.8045	22.4904	23.0168	NaN	22.9425	NaN	22.2508	NaN	NaN	NaN	NaN	NaN	22.7062	22.2453	22.8858	NaN	22.9278	NaN	NaN
0.329326	-0.117388	B0K020	CDGSH iron-sulfur domain-containing protein 1	Cisd1	6	12.097	2253900000	168	24.5769	24.686	24.5558	25.0296	25.1277	24.9983	24.3598	24.7004	24.5547	25.0669	25.1036	25.4213	24.9251	25.0115	24.8591	26.8184	26.7484	27.2838	24.7729	24.6701	24.8159	25.1925	25.234	24.917	24.7177	24.6282	24.6996	24.7567	24.6768	24.502	25.0594	25.1787	24.7841	24.6256	24.7476	24.8358	23.7257	23.9572	24.1226	24.6948	24.4837
0.825559	0.0172885	P62425;F1M013;B0K021;D3ZPL5;D3ZU22;D3ZJH5;D4A6B9;M0R3M3;F1M1M2;F1M4C7;F1M2Q3;F1M0S7;D4A8X2;D3ZD15;D3ZNA3;Q7TQ86;A0A0G2K6A5;M0R7A4	60S ribosomal protein L7a	Rpl7a;LOC100910109;LOC100911966;RGD1562953;LOC100361311;LOC680161	29	29.995	15764000000	765	27.5808	27.6524	27.6253	27.7975	27.6893	27.7491	27.6864	27.6557	27.679	26.6988	26.7354	26.7269	27.6905	27.602	27.546	28.2129	27.6026	28.0822	27.9286	27.9388	27.9255	27.9773	27.9387	27.988	28.0461	28.0041	28.0881	27.6898	27.9166	27.8019	27.9616	27.9458	28.0644	27.939	27.83	27.8862	28.0991	28.1907	28.1772	28.02	27.9145
1	NaN	B0K024;G3V7V2		Aamp	2	46.031	19691000	15	NaN	NaN	NaN	NaN	NaN	NaN	NaN	NaN	NaN	NaN	NaN	NaN	NaN	NaN	NaN	NaN	NaN	NaN	NaN	NaN	NaN	NaN	NaN	NaN	NaN	NaN	NaN	NaN	NaN	NaN	NaN	NaN	NaN	NaN	NaN	NaN	NaN	NaN	NaN	NaN	NaN
1	NaN	B0K025	Oligosaccharyltransferase complex subunit OSTC	Ostc	1	16.815	62701000	20	NaN	NaN	NaN	NaN	NaN	NaN	NaN	NaN	NaN	NaN	NaN	NaN	NaN	NaN	NaN	NaN	NaN	NaN	NaN	NaN	NaN	NaN	NaN	NaN	NaN	NaN	NaN	NaN	NaN	NaN	NaN	NaN	NaN	NaN	NaN	NaN	NaN	NaN	NaN	NaN	NaN
0.653625	0.0741002	B0K030;D3ZUU5		Dnajb1	5	38.147	268870000	65	22.2722	22.4501	NaN	NaN	NaN	22.1838	22.8172	NaN	22.3627	NaN	22.5303	NaN	23.0318	22.7251	NaN	23.0143	23.3691	23.3975	NaN	22.8924	NaN	NaN	NaN	22.9395	NaN	NaN	NaN	NaN	NaN	NaN	NaN	NaN	NaN	NaN	21.7369	22.4598	NaN	22.5259	NaN	NaN	NaN
0.335768	-0.151628	B0K031;P05426;B0K023;F1LUE9;Q7TP62	60S ribosomal protein L7	Rpl7	24	30.313	11551000000	669	26.5189	26.4639	26.5571	27.0121	26.9335	26.8816	27.187	27.2195	27.1388	26.6651	26.5942	26.6404	26.8178	26.7032	26.8436	28.2836	28.0907	28.2811	27.155	27.0373	27.1897	27.4975	27.4109	27.3684	27.4184	27.3722	27.3529	26.8523	26.9814	26.8416	27.3466	27.4683	27.3945	27.4782	27.5614	27.485	27.9277	27.9593	28.0406	27.6951	27.7062
0.132195	-0.204895	B0K034		Dtd2	3	18.453	299380000	27	NaN	22.3572	22.3032	NaN	21.9747	21.9745	NaN	NaN	NaN	NaN	NaN	NaN	22.3942	22.3091	NaN	NaN	NaN	NaN	22.5004	NaN	22.438	22.2884	22.2798	22.2954	22.1024	NaN	NaN	NaN	NaN	NaN	22.5468	23.0798	NaN	22.3532	22.1708	NaN	NaN	NaN	NaN	NaN	NaN
0.858282	0.0169402	B0LT89;H9KVF3;F1LXV3	Serine/threonine-protein kinase 24;Serine/threonine-protein kinase 24 35 kDa subunit;Serine/threonine-protein kinase 24 12 kDa subunit	Stk24	8	47.989	821020000	58	23.5386	23.865	23.4581	23.6695	23.9495	23.8371	23.9242	23.4471	23.6567	23.8875	23.8536	23.7611	23.5199	24.0277	23.6241	NaN	NaN	NaN	NaN	NaN	NaN	23.3074	23.2686	NaN	23.9946	23.9136	23.7222	23.7482	24.0776	23.8027	23.6778	NaN	23.5874	23.7554	23.5841	NaN	23.3685	23.6769	23.7061	23.4134	NaN
1	0.253178	B0ZTH9;B0ZTH8;B0ZTI0;P25114;F7FKL9	6-phosphofructo-2-kinase/fructose-2,6-bisphosphatase 4;6-phosphofructo-2-kinase;Fructose-2,6-bisphosphatase	Pfkfb4	2	43.178	357770000	24	NaN	NaN	NaN	NaN	NaN	NaN	NaN	22.6139	NaN	NaN	22.6008	NaN	NaN	NaN	NaN	NaN	NaN	NaN	NaN	NaN	NaN	NaN	NaN	22.7423	NaN	NaN	NaN	NaN	NaN	NaN	NaN	NaN	NaN	NaN	NaN	NaN	NaN	NaN	NaN	NaN	NaN
0.417569	-0.0970851	B1H216;P01946	Hemoglobin subunit alpha-1/2	Hba1	26	15.328	440500000000	2044	32.2456	32.2206	32.2873	31.9616	31.9735	31.9918	32.452	32.4158	32.4111	32.6674	32.621	32.6127	32.4778	32.3068	32.4598	32.3514	32.3666	32.2843	32.6148	32.5593	32.5754	32.7731	32.8428	32.8137	32.7222	32.7284	32.6978	32.7064	32.6976	32.6634	32.3815	32.2364	32.352	32.3972	32.4074	32.4324	32.3791	32.3533	32.4116	33.0799	33.0572
0.333677	0.0904648	E9PU42;B1H223		Dscr3	4	32.936	327240000	39	NaN	NaN	NaN	NaN	NaN	22.716	NaN	NaN	NaN	22.3913	22.485	22.5377	22.374	NaN	22.5453	NaN	NaN	NaN	NaN	NaN	22.5233	NaN	NaN	NaN	22.2884	NaN	22.6041	NaN	NaN	NaN	NaN	NaN	NaN	22.2598	NaN	NaN	22.6345	22.706	22.8404	22.4051	22.3035
0.276588	0.164439	B1H227		Rcc1	7	45.111	1116400000	176	24.4253	24.2627	24.3368	23.858	24.1111	23.9885	23.8282	23.8758	23.8382	24.4553	24.1149	24.4874	24.0804	24.025	23.9574	NaN	NaN	23.6502	24.0261	24.133	23.8162	24.3053	24.3316	24.4055	23.7616	23.7444	23.7669	24.2128	23.8858	24.005	23.6466	23.8568	23.7151	23.9183	24.0828	24.2181	22.9977	23.1745	NaN	23.4461	23.4466
0.191243	-0.0762741	B1H230;Q498S1;Q925D6		LOC100911550	4	39.31	408850000	69	22.3404	22.6193	22.4713	23.0085	NaN	22.807	22.5512	22.3475	22.6336	22.4815	22.4324	22.6397	22.4899	22.4417	22.4533	NaN	NaN	NaN	22.6743	22.4966	22.5508	22.4283	22.3049	22.4973	22.5118	22.6722	22.4764	22.756	22.9224	22.8145	NaN	NaN	22.7296	22.5286	22.4246	22.3521	22.2842	22.2221	22.1111	22.865	23.0145
1	NaN	Q80ZG1;B1H241;A0A1L1WKK3	Synembryn-A	Ric8a	2	59.832	25709000	19	NaN	NaN	NaN	NaN	NaN	NaN	NaN	NaN	NaN	NaN	NaN	NaN	NaN	NaN	NaN	NaN	NaN	NaN	NaN	NaN	NaN	NaN	NaN	NaN	NaN	NaN	NaN	NaN	NaN	NaN	NaN	NaN	NaN	NaN	NaN	NaN	NaN	NaN	NaN	NaN	NaN
0.699607	0.053263	B1H248;P0C0A2	Vacuolar protein-sorting-associated protein 36	Vps36	8	43.717	590870000	64	22.697	23.0887	23.3008	23.5189	23.0963	23.6332	NaN	NaN	23.2341	NaN	23.5765	23.1341	22.8602	23.0908	23.2689	NaN	NaN	NaN	23.2349	23.6579	23.3991	23.1638	22.9779	23.027	NaN	23.2996	23.3337	23.5505	23.384	NaN	23.3097	NaN	23.4397	23.1586	23.1569	23.1268	22.8825	23.1777	23.3596	23.2957	23.3192
0.184322	-0.0945255	B1H249		Gnpnat1	7	20.821	4592400000	247	26.1495	26.1041	25.9734	26.0962	26.1878	26.2897	26.1603	26.213	26.1654	26.1729	25.9728	25.9302	26.2882	26.2618	26.0358	NaN	NaN	NaN	26.3112	26.3003	26.2476	25.9317	26.0686	26.0022	25.6911	25.8481	25.5709	25.8098	25.9073	25.9747	26.2765	26.3349	26.0036	25.6838	26.0233	25.7678	26.2413	26.1977	26.0406	26.0359	26.3475
0.0709814	-0.19733	B1H263;F1MAF5		Pcid2	6	45.974	370150000	61	22.1793	21.6795	21.8414	23.2359	23.1872	22.8264	22.0296	22.3593	22.4687	22.3258	22.2609	22.3097	22.5556	22.4029	22.394	NaN	NaN	NaN	22.5218	NaN	22.2915	22.0281	22.1824	22.7209	22.4298	22.6268	22.4836	22.7376	22.9491	22.4565	NaN	22.5642	NaN	22.2491	22.0261	22.4312	22.3167	22.0254	22.4223	22.6029	22.2942
0.072653	-0.155557	B1H267	Sorting nexin-5	Snx5	16	46.793	1770700000	239	24.5182	24.6675	24.5556	24.704	24.7922	24.985	24.7535	24.7017	24.4788	24.6013	24.5739	24.6018	24.7474	24.6816	24.9356	24.307	24.4003	NaN	25.137	24.751	24.8182	24.5697	24.7354	24.6003	24.9346	24.705	24.8659	24.6511	24.573	24.4471	24.9792	24.9677	24.9716	24.369	24.4613	24.3053	24.6644	24.7003	24.5725	24.6254	24.751
0.797915	-0.00877508	Q5EBA9;Q499V7;F1LPV8;Q68FT4;B1H270	Succinyl-CoA ligase subunit beta	Suclg2	25	41.72	19734000000	946	28.0945	28.0171	27.9892	28.4709	28.3255	28.3716	27.9987	27.945	27.8819	28.0992	28.0952	28.095	28.0721	28.1361	28.0468	28.06	28.1603	28.4808	28.3222	28.2148	28.2165	28.2167	28.2431	28.2641	28.092	28.1325	27.9664	28.2204	28.1936	28.1799	27.9917	28.0932	28.1287	28.0104	28.0736	28.034	28.054	28.0106	28.0253	28.2217	28.2834
1	NaN	B1PLB2;B1PLB1		Cd34	2	35.488	37902000	4	NaN	NaN	NaN	NaN	NaN	NaN	NaN	NaN	NaN	NaN	NaN	NaN	NaN	NaN	NaN	NaN	NaN	NaN	NaN	NaN	NaN	NaN	NaN	NaN	NaN	NaN	NaN	NaN	NaN	NaN	NaN	NaN	NaN	NaN	NaN	NaN	NaN	NaN	NaN	NaN	NaN
0.163087	-0.224712	B1WBM0;P40241	Tetraspanin;CD9 antigen	Cd9	5	25.215	3393200000	155	25.7269	25.5047	25.5793	26.2769	26.0346	25.9655	25.6246	25.7011	25.8569	25.9988	25.7291	26.2045	25.443	25.7278	25.547	27.4837	27.5527	27.5985	25.4218	25.5514	25.7469	25.7038	25.7252	25.6833	25.2226	25.4634	25.2782	25.6072	25.5255	25.4519	25.3197	25.2467	25.2224	25.6126	25.3429	25.652	25.2403	25.469	25.6947	25.0612	25.0511
0.00518353	-0.251295	Q5EB89;B1WBN3;F7EV94;P11960	2-oxoisovalerate dehydrogenase subunit alpha, mitochondrial	Bckdha	8	37.334	660770000	122	23.3844	22.7926	23.1909	23.0647	22.9616	23.3358	23.1184	23.4616	23.1533	23.0306	23.1716	23.5473	23.1051	23.078	23.3681	23.0811	23.2667	23.9057	23.3687	23.6369	23.3961	23.4273	23.6607	23.0364	23.0761	22.9039	23.046	23.3537	23.1964	23.1178	NaN	NaN	23.1236	22.793	23.1849	23.1972	23.3846	23.2959	22.9012	23.4118	23.5515
1	NaN	B1WBN8	Caveolin	Cav1	2	17.103	45442000	2	NaN	NaN	NaN	NaN	NaN	NaN	NaN	NaN	NaN	NaN	NaN	NaN	NaN	NaN	NaN	NaN	NaN	NaN	NaN	NaN	NaN	NaN	NaN	NaN	NaN	NaN	NaN	NaN	NaN	NaN	NaN	NaN	NaN	NaN	NaN	20.3105	NaN	NaN	NaN	NaN	NaN
1	NaN	B1WBP4;Q812E8	Glutamine-dependent NAD(+) synthetase	Nadsyn1	3	81.546	53449000	1	NaN	NaN	NaN	NaN	NaN	NaN	NaN	NaN	NaN	NaN	NaN	NaN	NaN	NaN	NaN	NaN	NaN	NaN	NaN	NaN	NaN	NaN	NaN	NaN	NaN	NaN	NaN	NaN	NaN	NaN	NaN	NaN	NaN	NaN	NaN	NaN	NaN	NaN	NaN	NaN	NaN
1	NaN	B1WBQ0;O08837	Cell division cycle 5-like protein	Cdc5l	8	92.216	464990000	6	NaN	NaN	NaN	NaN	NaN	NaN	NaN	NaN	NaN	NaN	NaN	NaN	NaN	NaN	NaN	NaN	NaN	NaN	NaN	NaN	NaN	NaN	NaN	NaN	NaN	NaN	NaN	NaN	NaN	NaN	NaN	NaN	NaN	NaN	NaN	NaN	NaN	NaN	NaN	NaN	23.307
0.331078	-0.194176	B1WBQ5;O54748	Serine/threonine-protein kinase 3;Serine/threonine-protein kinase 3 36kDa subunit;Serine/threonine-protein kinase 3 20kDa subunit	Stk3	4	56.135	158330000	56	NaN	NaN	NaN	NaN	NaN	NaN	NaN	NaN	22.0446	NaN	21.5218	NaN	NaN	NaN	NaN	NaN	NaN	NaN	NaN	NaN	NaN	21.7335	NaN	NaN	NaN	22.0399	22.3059	NaN	NaN	NaN	NaN	NaN	NaN	NaN	21.7116	21.8481	21.6479	NaN	NaN	NaN	NaN
0.411701	0.110873	B1WBS4		Vps26b	5	39.124	397650000	22	22.9996	NaN	22.8702	NaN	NaN	NaN	NaN	22.5662	22.4846	22.5992	22.6394	22.8631	22.9235	22.7977	22.643	NaN	NaN	NaN	NaN	NaN	NaN	22.7432	NaN	22.6699	NaN	NaN	NaN	NaN	NaN	NaN	NaN	NaN	22.1946	NaN	22.6973	NaN	22.5682	22.8665	23.1405	NaN	NaN
1	NaN	B1WBS6		Glb1l	1	73.261	572650000	43	NaN	NaN	NaN	NaN	NaN	NaN	NaN	NaN	NaN	NaN	NaN	NaN	NaN	NaN	NaN	NaN	NaN	NaN	NaN	NaN	NaN	NaN	NaN	NaN	NaN	NaN	NaN	NaN	NaN	NaN	NaN	NaN	NaN	NaN	NaN	NaN	NaN	NaN	NaN	NaN	NaN
0.0451981	-0.267924	B1WBU9;G3V8V3;P09812	Alpha-1,4 glucan phosphorylase;Glycogen phosphorylase, muscle form	Pygm	12	97.321	785380000	72	23.5803	23.6921	23.5197	23.9981	23.895	23.7841	23.926	23.794	NaN	23.3116	23.2554	23.1768	23.3401	23.1873	23.1272	NaN	NaN	NaN	23.6297	23.9106	23.4752	23.0207	23.181	23.2683	NaN	24.3539	23.83	23.7481	24.1211	24.5163	23.8995	23.2499	24.0321	22.937	23.1172	23.8499	23.6629	23.3015	23.3896	23.7609	24.0477
1	NaN	B1WBV4		Plekhf2	4	27.74	127090000	8	NaN	NaN	NaN	NaN	NaN	NaN	NaN	NaN	NaN	NaN	NaN	NaN	NaN	NaN	NaN	22.6433	NaN	22.9081	NaN	NaN	NaN	NaN	NaN	NaN	NaN	NaN	NaN	NaN	NaN	NaN	NaN	NaN	NaN	NaN	NaN	NaN	NaN	NaN	NaN	NaN	NaN
0.135137	-0.100578	B1WBV8;G3V904		Pld4	4	55.983	446030000	36	NaN	23.0431	22.8757	22.7416	NaN	23.0255	22.8548	22.9447	22.7936	22.7888	22.4821	22.7395	NaN	NaN	22.6331	NaN	NaN	NaN	23.2215	23.2172	23.0509	NaN	22.634	22.562	22.7877	NaN	22.9981	NaN	22.787	NaN	NaN	NaN	22.9049	22.6455	22.8063	22.5876	22.8214	22.8863	22.9123	22.9117	23.0973
0.0513141	0.214088	B1WBY1		Cul1	7	89.69	745950000	128	23.0464	23.1827	23.3166	23.7683	23.6005	23.5594	23.6676	23.3151	22.9435	23.0077	23.4779	23.3117	23.3602	23.4257	23.5479	NaN	NaN	NaN	22.9313	22.6811	23.2155	23.1674	23.2342	23.1183	23.6939	23.7829	24.2739	23.4043	23.4415	23.6222	23.1721	23.0955	23.3395	23.3196	23.2651	23.4625	23.2292	23.4271	23.657	23.723	23.5275
1	NaN	B1WBY2;D4A4P4		Flad1	2	52.638	92062000	11	21.5955	NaN	NaN	NaN	NaN	NaN	NaN	NaN	NaN	NaN	NaN	NaN	NaN	21.1512	NaN	NaN	NaN	NaN	NaN	NaN	NaN	NaN	NaN	NaN	NaN	21.3242	NaN	NaN	NaN	NaN	NaN	NaN	NaN	NaN	NaN	NaN	NaN	NaN	NaN	NaN	NaN
1	NaN	B1WBY6;G3V6M8		Nup37	3	33.285	122210000	14	NaN	NaN	NaN	NaN	NaN	NaN	NaN	NaN	NaN	NaN	NaN	NaN	NaN	NaN	NaN	NaN	NaN	NaN	NaN	NaN	NaN	NaN	NaN	NaN	NaN	NaN	NaN	NaN	NaN	NaN	NaN	NaN	NaN	NaN	NaN	NaN	NaN	NaN	NaN	NaN	NaN
0.333205	-0.132098	B1WBY8;F7ENH8;Q99PA1	Histone deacetylase	Hdac2	4	61.422	438280000	76	22.7172	22.6698	22.5494	23.1717	22.6594	23.2069	22.4623	22.7649	22.6719	22.882	22.9947	22.6381	22.9651	22.6577	22.5443	NaN	NaN	NaN	NaN	NaN	NaN	22.3318	22.5874	22.5755	22.656	22.3877	22.5454	23.1351	23.0139	23.1432	NaN	NaN	NaN	22.3364	22.8257	23.0146	22.7791	NaN	NaN	22.9423	23.1165
1	NaN	B1WC02	CTP synthase	Ctps1	5	66.64	391610000	16	NaN	NaN	NaN	NaN	NaN	NaN	NaN	NaN	NaN	NaN	NaN	NaN	NaN	22.1173	NaN	NaN	NaN	NaN	NaN	NaN	NaN	NaN	NaN	NaN	NaN	NaN	NaN	NaN	NaN	NaN	NaN	NaN	NaN	NaN	22.7671	NaN	NaN	NaN	NaN	NaN	NaN
1	NaN	B1WC21	Fibulin-1	Fbln1	2	75.38	240440000	4	NaN	NaN	NaN	NaN	NaN	NaN	NaN	NaN	NaN	NaN	NaN	NaN	NaN	NaN	NaN	NaN	NaN	NaN	NaN	NaN	NaN	NaN	NaN	NaN	NaN	NaN	NaN	NaN	NaN	NaN	NaN	NaN	NaN	NaN	NaN	NaN	NaN	NaN	NaN	NaN	NaN
0.702051	-0.0479107	B1WC25		Tra2a	4	32.578	133110000	16	NaN	NaN	NaN	NaN	NaN	NaN	21.8949	21.8852	NaN	NaN	21.6797	NaN	NaN	NaN	21.6663	NaN	NaN	NaN	NaN	NaN	NaN	21.8018	NaN	21.5943	NaN	NaN	21.9392	NaN	21.8141	21.961	NaN	NaN	NaN	NaN	NaN	NaN	NaN	NaN	NaN	NaN	NaN
0.030629	-0.161528	B1WC26		Nans	35	40.051	55380000000	1490	29.6618	29.6193	29.6957	29.6978	29.7217	29.7928	29.7099	29.7316	29.6316	29.5618	29.59	29.5831	29.6691	29.6699	29.6115	29.1491	29.2928	29.15	30.0789	30.131	30.062	29.4826	29.4644	29.5519	29.446	29.4124	29.4111	29.8251	29.6777	29.7468	29.921	29.9068	29.9762	29.449	29.5099	29.4691	29.7734	29.7919	29.7525	29.6344	29.5876
0.957609	0.00373802	B1WC32;F1LS72;Q4G010		Uba2	16	70.769	1720600000	303	24.3551	24.0996	24.3553	24.7833	24.739	24.7013	24.4072	24.4264	24.6043	24.3444	24.4528	24.327	24.5458	24.4797	24.5442	25.4215	25.1824	24.5938	24.589	24.6702	24.4621	24.1854	24.075	24.2538	24.8442	24.6567	24.8627	24.3695	24.5086	24.5579	24.7335	24.5668	24.4586	24.025	24.0872	24.0193	24.6018	24.5705	24.5273	24.3845	24.6718
0.137399	-0.142183	B1WC34		Prkcsh	21	59.218	6084500000	604	26.4279	26.4649	26.5502	26.3939	26.6449	26.5547	26.5639	26.364	26.3133	26.3986	26.4073	26.3416	26.3366	26.3778	26.3197	26.5038	26.3474	26.7824	26.9566	26.6374	26.6803	26.492	26.4962	26.4982	25.7872	25.97	25.87	26.2595	26.2547	26.2353	26.7195	26.6098	26.6814	26.4493	26.3597	26.5644	26.7312	26.5013	26.6617	26.1531	26.5353
1	NaN	B1WC42		Trip6	3	50.915	124010000	5	NaN	NaN	NaN	NaN	NaN	NaN	NaN	NaN	NaN	NaN	NaN	NaN	NaN	NaN	NaN	NaN	NaN	NaN	NaN	NaN	NaN	NaN	NaN	NaN	NaN	NaN	NaN	NaN	NaN	NaN	NaN	NaN	NaN	NaN	NaN	NaN	NaN	NaN	NaN	NaN	NaN
0.0215758	0.158099	B1WC49		Api5	12	56.784	2330800000	211	25.2426	25.0929	25.0426	25.4818	25.3015	25.3933	25.0958	25.1217	25.0712	25.0757	25.1036	24.9708	25.0613	25.0876	25.0474	NaN	NaN	NaN	24.6773	24.7132	24.7813	25.3156	25.3221	25.2625	25.2715	25.3417	25.2809	25.0984	24.8717	25.1659	24.7305	24.6412	24.7599	24.927	24.9821	24.8622	24.9289	24.9715	25.064	25.1529	25.2298
0.000457915	-0.272075	B1WC61;Q7TSP3		Acad9	16	68.842	1723400000	165	24.2911	24.1803	24.3446	24.6176	24.4431	24.6635	24.8066	24.5901	24.763	24.324	24.3731	24.3867	24.2424	24.2875	24.2945	25.1866	24.7533	25.4239	24.6634	24.3961	24.7461	24.665	24.7768	24.5887	24.5851	24.2865	24.4884	24.259	24.0803	24.2685	24.6735	24.8592	25.0035	24.6664	24.1374	24.3822	24.3939	24.5097	24.4052	24.2583	24.2597
0.040874	-0.294176	B1WC67		Slc25a24	12	52.89	2733400000	296	25.1357	25.0578	25.0245	26.0907	26.1274	26.27	25.8336	25.6563	25.7796	25.0899	25.1492	25.3124	25.091	24.9087	25.0259	25.047	25.5776	25.3229	25.601	25.6794	25.5832	25.5545	25.5859	25.4477	24.5914	24.3848	24.3508	25.6025	25.4667	25.522	25.2432	25.2493	25.3742	25.2928	25.2754	25.3729	24.9115	25.0152	25.1351	25.4009	25.4634
0.195933	0.161494	B1WC70		Ppp1r8	5	38.539	185800000	46	NaN	21.7031	21.7888	NaN	NaN	NaN	NaN	NaN	NaN	NaN	21.9748	21.8005	22.0462	NaN	NaN	NaN	NaN	NaN	21.9216	21.7826	21.7246	22.0492	NaN	22.031	NaN	NaN	NaN	NaN	NaN	NaN	NaN	21.8832	NaN	NaN	NaN	NaN	NaN	22.0119	22.3174	21.5078	NaN
0.823988	0.0491489	B1WC84		Cnpy4	4	28.384	198400000	24	NaN	NaN	NaN	NaN	NaN	NaN	21.9389	NaN	NaN	NaN	22.4022	21.9125	22.0614	21.9399	22.3883	NaN	NaN	NaN	NaN	NaN	NaN	NaN	21.6337	NaN	NaN	NaN	NaN	NaN	NaN	NaN	NaN	NaN	NaN	NaN	NaN	NaN	NaN	NaN	NaN	NaN	NaN
1	NaN	B2B9A9		Efnb2	1	37.281	300470000	1	NaN	NaN	NaN	NaN	NaN	NaN	NaN	NaN	NaN	NaN	NaN	NaN	NaN	NaN	NaN	NaN	NaN	NaN	NaN	NaN	NaN	NaN	NaN	NaN	NaN	NaN	NaN	NaN	NaN	NaN	NaN	NaN	NaN	NaN	NaN	NaN	NaN	NaN	NaN	NaN	NaN
1	NaN	B2GUU1;Q1JU70;Q4V8J6;E9PU11		Ythdf2;Ythdf1	2	62.339	112370000	0	NaN	NaN	NaN	NaN	NaN	NaN	NaN	NaN	NaN	NaN	NaN	NaN	NaN	NaN	NaN	NaN	NaN	NaN	NaN	NaN	NaN	NaN	NaN	NaN	NaN	NaN	NaN	NaN	NaN	NaN	NaN	NaN	NaN	NaN	NaN	NaN	NaN	NaN	NaN	NaN	NaN
1	-0.685482	B2GUV2;O55166	Vacuolar protein sorting-associated protein 52 homolog	Vps52	3	82.102	48875000	39	NaN	NaN	NaN	NaN	NaN	NaN	22.1652	NaN	NaN	NaN	NaN	NaN	NaN	21.4798	NaN	NaN	NaN	NaN	NaN	NaN	NaN	NaN	NaN	NaN	NaN	NaN	NaN	NaN	NaN	NaN	NaN	NaN	NaN	NaN	NaN	NaN	NaN	NaN	NaN	NaN	NaN
0.17078	-0.10743	B2GUV5;A0A0G2KAG3;A0A0G2K2R1;Q811A7;Q8R2H0		Atp6v1g1	4	13.71	918450000	143	23.6702	23.68	24.1067	23.5412	NaN	23.6243	23.5929	23.6772	23.7106	23.5813	24.033	23.525	23.8365	23.7247	23.741	24.9418	25.0947	24.6819	24.0001	23.794	23.8669	23.7594	23.6031	23.723	23.5452	23.3831	23.4362	23.2079	23.1029	22.7731	23.8009	23.9777	23.7387	23.7206	23.3988	23.7829	23.5588	23.4586	23.5443	22.97	23.1942
1	NaN	B2GUW2		Arhgef16	3	79.869	15193000	10	NaN	NaN	NaN	NaN	NaN	NaN	NaN	NaN	NaN	NaN	NaN	NaN	NaN	NaN	20.9032	NaN	NaN	NaN	NaN	NaN	NaN	NaN	NaN	NaN	NaN	NaN	NaN	NaN	NaN	NaN	NaN	NaN	NaN	NaN	NaN	NaN	NaN	NaN	NaN	NaN	NaN
1	NaN	B2GUX5	5-nucleotidase	Nt5c3a	2	33.81	199620000	18	NaN	NaN	NaN	NaN	NaN	NaN	NaN	NaN	NaN	NaN	NaN	NaN	NaN	NaN	NaN	NaN	NaN	NaN	NaN	NaN	NaN	NaN	NaN	NaN	NaN	NaN	NaN	NaN	NaN	NaN	NaN	NaN	NaN	NaN	NaN	NaN	NaN	NaN	NaN	NaN	NaN
1	NaN	M0R851;B2GUZ1	Ubiquitin carboxyl-terminal hydrolase;Ubiquitin carboxyl-terminal hydrolase 4	Usp4	4	103.71	86827000	8	NaN	NaN	NaN	NaN	NaN	NaN	NaN	NaN	NaN	NaN	NaN	NaN	NaN	NaN	NaN	NaN	NaN	NaN	NaN	NaN	NaN	NaN	NaN	NaN	NaN	NaN	NaN	NaN	NaN	NaN	NaN	NaN	NaN	NaN	NaN	NaN	21.2394	NaN	NaN	NaN	NaN
1	NaN	B2GUZ3		Mthfd1l	6	105.84	283200000	7	NaN	NaN	NaN	NaN	NaN	NaN	NaN	NaN	NaN	NaN	NaN	NaN	NaN	NaN	NaN	NaN	NaN	NaN	NaN	NaN	NaN	NaN	NaN	NaN	NaN	NaN	NaN	NaN	NaN	NaN	NaN	NaN	NaN	NaN	NaN	NaN	NaN	NaN	NaN	NaN	NaN
0.00341123	-0.116758	B2GUZ5	F-actin-capping protein subunit alpha-1	Capza1	13	32.909	4114200000	317	25.7883	25.867	25.9013	26.15	26.0514	26.1102	26.0031	26.0733	25.9811	25.8861	26.073	25.9902	25.8115	25.9063	25.9604	25.9254	25.2342	25.7593	25.9993	25.8446	25.9764	25.8377	25.754	25.8398	25.9589	25.7203	25.891	25.7118	25.8804	25.9018	25.8729	25.6801	25.9012	25.9478	25.9429	25.9051	25.7601	25.9412	25.8153	25.9349	25.8058
1	NaN	B2GUZ6		Rtn4ip1	1	43.605	31022000	8	NaN	NaN	NaN	NaN	NaN	NaN	NaN	NaN	NaN	NaN	NaN	NaN	NaN	NaN	NaN	NaN	NaN	NaN	NaN	NaN	NaN	NaN	NaN	NaN	NaN	NaN	NaN	NaN	NaN	NaN	NaN	NaN	NaN	NaN	NaN	NaN	NaN	NaN	NaN	NaN	NaN
1	NaN	B2GUZ7		Tbcc	4	38.076	63420000	11	NaN	NaN	NaN	NaN	NaN	NaN	NaN	NaN	NaN	NaN	NaN	NaN	NaN	NaN	NaN	NaN	NaN	NaN	NaN	NaN	NaN	NaN	NaN	NaN	NaN	NaN	NaN	NaN	NaN	NaN	NaN	NaN	NaN	NaN	NaN	NaN	NaN	NaN	NaN	NaN	NaN
0.0799877	-0.197861	B2GUZ9		Fam49b	13	36.776	1642700000	182	24.1799	24.0483	24.2716	24.9813	24.9874	25.1211	24.2839	24.4371	24.3718	24.4761	24.564	24.8248	24.1901	24.2261	24.1615	NaN	NaN	NaN	25.2461	24.9438	25.1718	24.4788	24.4796	24.6027	24.5275	24.5791	24.5507	24.5377	24.3104	24.1521	24.6039	24.7126	24.4839	24.1691	24.4554	24.5932	24.6322	24.4144	24.4908	24.6472	24.8468
0.0070192	0.172344	B2GV01;Q4FZS6;D3ZPH3;A0A0G2JTK6		Mta2	10	74.959	965470000	227	23.7485	24.0906	23.8817	23.2444	23.902	23.2236	23.7888	23.7269	23.6472	23.8891	23.9222	23.68	23.7112	23.83	23.8682	24.2725	24.1816	24.0289	23.7198	23.888	23.7627	23.9115	23.7506	23.8508	23.9143	23.6357	23.9088	23.2372	23.4934	23.3941	23.8899	23.9407	23.8471	23.7747	23.811	23.8006	23.9122	24.1918	23.8391	23.2308	23.3365
0.000122653	-0.237681	B2GV06	Succinyl-CoA:3-ketoacid coenzyme A transferase 1, mitochondrial	Oxct1	19	56.203	5490300000	493	26.0564	26.0424	25.9952	26.75	26.7596	26.7854	26.0172	26.0994	26.1434	26.2303	26.1108	26.2323	26.0606	25.95	26.1078	26.8153	26.0348	26.6144	26.2624	26.2549	26.2679	26.0494	25.8969	25.9188	25.7967	25.8547	26.0493	26.5848	26.4711	26.6339	26.3561	26.3905	26.3547	26.3194	26.2804	26.2874	26.369	26.2085	26.0508	26.3092	26.3581
1	NaN	B2GV14		Txlna	3	62.566	66918000	41	NaN	NaN	NaN	NaN	NaN	NaN	NaN	NaN	21.9183	NaN	NaN	NaN	NaN	NaN	NaN	NaN	NaN	NaN	NaN	NaN	NaN	NaN	NaN	NaN	NaN	NaN	NaN	NaN	NaN	NaN	NaN	NaN	NaN	NaN	NaN	NaN	NaN	NaN	NaN	NaN	NaN
0.573067	-0.0502543	B2GV15;Q99PU6		Dbt	10	53.273	2000400000	178	24.7204	24.6519	24.6475	24.9874	25.0637	24.9864	24.5631	24.6648	24.8557	25.0746	25.1142	25.0253	24.7024	24.6984	24.6702	NaN	NaN	NaN	25.1832	24.8939	25.3541	24.8456	24.7946	24.7167	24.7059	24.4955	24.6579	25.0631	25.0122	24.7913	24.947	25.1702	25.1738	24.8928	25.0903	24.8976	24.8984	24.929	24.9834	25.0676	25.2941
0.267126	0.269508	M0RBX2;B2GV19		Anks4b	5	41.316	201240000	34	NaN	NaN	NaN	NaN	22.7365	NaN	NaN	NaN	NaN	22.3816	22.3058	22.5024	NaN	22.3711	NaN	23.3077	23.2239	22.4845	NaN	22.5964	21.7024	22.1309	22.8801	22.6759	22.487	22.4293	22.4164	22.3699	NaN	NaN	NaN	NaN	NaN	22.6364	22.2924	NaN	NaN	NaN	NaN	22.5507	NaN
0.100863	-0.161309	B2GV24;A0A0G2K266	E3 UFM1-protein ligase 1	Ufl1	9	89.584	771290000	130	23.0049	23.3101	23.3325	24.0633	23.9853	23.8404	23.3827	23.701	23.8579	23.6498	23.5752	23.5951	23.6611	23.3237	23.1868	NaN	NaN	NaN	24.076	23.6271	23.7875	23.3931	23.5289	23.4235	23.5365	23.6793	23.7001	23.8347	23.3138	23.6645	23.8239	23.7567	23.7516	23.3262	23.0257	23.4437	23.641	23.667	23.474	23.8157	23.7224
0.387301	-0.119972	B2GV38	Ubiquitin-like protein 4A	Ubl4a	4	17.79	352620000	55	22.3722	22.1425	22.0644	NaN	NaN	NaN	22.8073	NaN	22.5839	22.5678	22.7209	22.5151	NaN	22.7391	NaN	NaN	NaN	NaN	22.7408	22.4653	22.6299	22.8516	23.1088	23.047	NaN	NaN	NaN	NaN	NaN	NaN	NaN	NaN	NaN	22.3785	22.306	22.4842	22.7997	22.8289	22.6323	22.1073	22.0651
1	NaN	B2GV41		Usp39	3	65.244	103530000	8	NaN	NaN	NaN	NaN	NaN	NaN	NaN	NaN	NaN	NaN	NaN	NaN	NaN	NaN	NaN	NaN	NaN	NaN	NaN	NaN	NaN	NaN	NaN	NaN	NaN	NaN	NaN	NaN	NaN	NaN	NaN	NaN	NaN	NaN	NaN	NaN	NaN	NaN	NaN	NaN	NaN
1	NaN	B2GV57		Cars2	2	60.917	59448000	19	NaN	NaN	NaN	NaN	NaN	NaN	NaN	NaN	NaN	NaN	NaN	NaN	NaN	NaN	NaN	NaN	NaN	NaN	NaN	NaN	NaN	NaN	NaN	NaN	NaN	NaN	NaN	NaN	NaN	NaN	NaN	NaN	NaN	NaN	NaN	NaN	NaN	NaN	NaN	NaN	NaN
1	NaN	B2GV62		Mrpl20	1	17.525	200420000	14	NaN	NaN	NaN	NaN	NaN	NaN	NaN	NaN	NaN	NaN	NaN	NaN	NaN	NaN	NaN	NaN	NaN	NaN	NaN	NaN	NaN	NaN	NaN	NaN	NaN	NaN	NaN	NaN	NaN	NaN	NaN	NaN	NaN	NaN	NaN	NaN	NaN	NaN	NaN	NaN	NaN
0.599296	-0.0750188	B2GV69		Hnrnpa2b1	2	18.384	569680000	75	22.4769	22.5145	NaN	23.1698	23.2575	23.2213	22.8549	22.6431	23.033	23.3196	23.3608	23.3811	23.5762	23.3027	23.2438	NaN	NaN	NaN	23.6082	23.5425	23.4375	23.2515	23.3494	23.324	NaN	22.8503	22.9239	22.3829	22.5057	22.4953	23.2223	22.9906	22.9276	22.8388	22.7496	23.1239	23.0566	22.9393	22.8926	23.4085	23.236
0.341994	0.0465178	B2GV72		Cbr3	12	30.841	1376900000	195	24.1628	24.1673	24.2834	23.7293	23.7177	24.0108	24.1966	23.9356	24.1559	24.1814	24.2802	24.4207	24.2668	24.1754	24.2798	25.5281	24.5198	24.1023	24.2349	24.2099	24.1441	24.1749	24.0703	24.0491	24.4848	24.4138	24.5423	24.1501	24.2944	24.2646	24.2156	24.402	24.3051	23.9033	23.8461	23.9389	24.3418	24.2734	24.3076	23.9946	24.0576
1	NaN	B2GV74		Klc2	2	68.61	45132000	20	NaN	NaN	NaN	NaN	NaN	NaN	NaN	NaN	NaN	NaN	NaN	21.0501	NaN	NaN	NaN	NaN	NaN	NaN	NaN	NaN	NaN	NaN	NaN	NaN	NaN	NaN	NaN	NaN	NaN	NaN	NaN	NaN	NaN	NaN	NaN	NaN	NaN	NaN	NaN	NaN	NaN
0.000200725	-0.261586	P83868;B2GV92;Q5PQL9	Prostaglandin E synthase 3	Ptges3	10	18.721	6137500000	269	26.1193	25.9949	26.0231	26.6022	26.5779	26.5388	26.4383	26.313	26.3929	26.3972	26.7174	26.5536	25.9924	26.0526	26.0889	25.1513	25.7613	24.394	26.506	26.5232	26.493	26.4078	26.37	26.6099	26.4584	26.4122	26.3899	26.4992	26.4101	26.3399	26.2601	26.1688	26.061	26.3417	26.4578	26.3489	26.2721	26.1969	26.102	26.8226	26.7853
1	NaN	B2GV93;Q63014	A-kinase anchor protein 8	Akap8	2	76.161	51852000	13	NaN	NaN	NaN	NaN	NaN	NaN	NaN	NaN	NaN	NaN	NaN	NaN	NaN	NaN	NaN	NaN	NaN	NaN	NaN	NaN	NaN	NaN	NaN	NaN	NaN	NaN	NaN	NaN	NaN	NaN	NaN	NaN	NaN	NaN	NaN	NaN	NaN	NaN	NaN	NaN	NaN
1	NaN	Q8K551;Q8R4I6;B2GVB3		Actn3	1	100.61	5940200	1	NaN	NaN	NaN	NaN	NaN	NaN	NaN	NaN	NaN	NaN	NaN	NaN	NaN	NaN	NaN	23.3773	NaN	NaN	NaN	NaN	NaN	NaN	NaN	NaN	NaN	NaN	NaN	NaN	NaN	NaN	NaN	NaN	NaN	NaN	NaN	NaN	NaN	NaN	NaN	NaN	NaN
0.835057	0.0131869	B2GVB4		2009-09-01	22	62.031	5736800000	559	26.0884	26.1725	26.2084	26.2122	26.1643	26.2198	26.3767	26.4176	26.3475	26.297	26.2087	26.2765	26.3077	26.3505	26.2857	26.0287	26.2524	27.296	26.1439	26.1152	26.3451	26.0642	26.2385	26.324	26.4623	26.2939	26.3955	25.9985	26.0601	26.0868	25.9644	25.9627	26.1987	26.3007	26.3638	26.3397	26.5464	26.3791	26.4307	26.2273	26.225
0.841934	-0.012596	B2GVB7;G3V9E4;P13676	Acylamino-acid-releasing enzyme	Apeh	18	81.383	2782100000	207	25.1618	25.1587	25.3116	25.9329	25.4855	25.2165	25.0992	25.4683	25.0674	25.3192	25.1441	24.9059	25.2456	25.1795	25.4997	25.9861	25.6348	25.8198	25.4201	25.4449	25.1196	25.0066	24.8978	24.9608	25.3478	25.4689	25.376	24.8769	25.0855	25.0388	25.2983	25.0541	25.3094	25.2389	25.1629	25.2129	25.0691	25.0138	25.0417	25.0008	25.0424
0.591742	0.0453049	B2GVB9		Fermt3	10	75.622	1270200000	276	24.1885	24.0223	23.855	24.4173	24.5628	24.3378	24.0311	23.9507	24.0786	23.6599	24.231	24.0355	24.2977	24.207	24.2857	NaN	NaN	NaN	24.4845	24.3695	24.3765	24.1082	24.3339	24.1713	24.6472	24.2898	24.3678	23.9326	23.7838	24.1352	24.0167	24.0901	24.066	24.2243	24.0392	24.2968	24.0735	24.2075	24.3658	24.0865	24.1116
0.93187	0.00660419	B2RYA5;G3V9K0		Cars	7	74.617	525590000	76	22.7943	22.7932	22.5032	23.1278	NaN	23.0401	22.801	22.7819	NaN	22.7649	23.1133	22.9609	23.1632	22.9679	22.9562	NaN	NaN	NaN	23.0261	22.987	23.0907	23.0073	22.8061	22.5026	23.1665	23.0778	23.1775	NaN	22.9757	NaN	23.2316	23.2686	22.665	22.8283	22.782	22.7538	23.0926	23.0985	22.9172	22.9476	22.2694
1	NaN	B2RYC5;F1MAB2		RGD1310209;5330417C22Rik	3	81.65	27538000	7	NaN	NaN	NaN	NaN	NaN	NaN	NaN	NaN	NaN	NaN	NaN	NaN	NaN	NaN	NaN	NaN	NaN	NaN	NaN	NaN	NaN	NaN	NaN	NaN	NaN	NaN	NaN	NaN	NaN	NaN	NaN	NaN	NaN	NaN	NaN	NaN	NaN	NaN	NaN	NaN	NaN
0.0713388	0.233863	B2RYC9	Glucosylceramidase	Gba	7	57.491	940330000	15	23.6416	23.5748	23.6792	NaN	NaN	NaN	23.5242	23.6812	23.4438	NaN	NaN	NaN	24.1486	NaN	23.6341	NaN	NaN	NaN	NaN	NaN	NaN	NaN	23.6184	23.633	NaN	24.3526	24.425	NaN	NaN	23.9717	NaN	NaN	NaN	23.5937	23.5312	23.7955	NaN	23.4819	23.6118	NaN	NaN
0.201412	-0.119414	F1LP81;B2RYD2;G3V8M2;B2RYJ8	Epithelial splicing regulatory protein 1	Esrp1	8	75.505	920590000	50	23.7815	23.4822	23.6575	24.4939	24.3068	NaN	23.5774	23.7427	23.7573	23.6358	23.6382	23.9095	23.5591	23.6623	23.6941	NaN	NaN	23.6846	24.2212	24.2257	23.8679	23.874	23.9047	23.8886	23.9996	23.9848	23.9886	23.8135	23.5965	24.0356	23.9889	23.8692	NaN	23.4009	23.3059	23.4574	23.6781	NaN	23.7522	23.8265	23.7536
0.0995053	-0.385744	B2RYD7;Q7TQ74		Stt3b	4	93.435	555370000	29	NaN	NaN	22.9526	NaN	NaN	23.9534	23.294	23.3982	23.3735	22.9346	22.7698	22.7176	NaN	NaN	NaN	NaN	NaN	NaN	NaN	NaN	23.9434	23.4419	23.5349	23.7556	NaN	NaN	NaN	NaN	NaN	NaN	NaN	NaN	NaN	NaN	23.1038	23.7601	23.1057	NaN	NaN	23.1799	23.4556
1	NaN	G3V828;B2RYF8		Cnpy3	2	30.647	48935000	32	NaN	NaN	NaN	NaN	NaN	NaN	NaN	NaN	NaN	NaN	NaN	NaN	NaN	NaN	NaN	NaN	NaN	NaN	NaN	NaN	NaN	NaN	NaN	NaN	NaN	NaN	NaN	NaN	NaN	NaN	NaN	NaN	NaN	NaN	NaN	NaN	NaN	NaN	NaN	NaN	NaN
0.0155206	-0.15818	B2RYG2;F1LQJ7		Pck2	34	73.271	11383000000	810	27.2966	27.2266	27.1891	27.6867	27.5167	27.6424	27.3433	27.1769	27.2291	27.2769	27.2518	27.2426	27.1616	27.1081	27.2249	28.0517	27.8594	28.03	27.6458	27.503	27.4849	27.3111	27.4226	27.343	27.0532	27.0487	26.9539	27.638	27.4934	27.5416	27.5033	27.4565	27.3341	27.2255	27.3392	27.2237	27.1362	27.174	27.127	27.239	27.112
0.518269	-0.0476579	B2RYG6	Ubiquitin thioesterase OTUB1	Otub1	11	31.27	3096000000	392	25.328	25.2755	25.1907	25.1551	25.4992	25.2544	25.2276	25.3438	25.2596	25.3032	25.2809	25.2569	25.3513	25.4145	25.2617	25.5043	25.4059	25.872	25.47	25.4991	25.3763	25.2956	25.4512	25.3308	25.494	25.6938	25.8717	25.6012	25.5259	25.5633	25.1201	25.2637	25.2653	25.2087	25.1219	25.139	25.1066	25.2014	25.1558	25.2362	25.4063
1	NaN	B2RYI0	WD repeat-containing protein 91	Wdr91	1	83.145	9660600	4	NaN	NaN	NaN	NaN	NaN	NaN	NaN	NaN	NaN	NaN	NaN	NaN	NaN	NaN	NaN	NaN	NaN	NaN	NaN	NaN	NaN	NaN	NaN	NaN	NaN	NaN	NaN	NaN	NaN	NaN	NaN	NaN	NaN	NaN	NaN	NaN	NaN	NaN	NaN	NaN	NaN
0.857383	0.0181861	B2RYI2	Signal recognition particle subunit SRP68	Srp68	13	70.491	889980000	77	NaN	NaN	23.646	23.1988	23.924	NaN	23.709	23.7101	23.9466	23.9946	23.969	24.0045	23.8335	23.6605	23.6038	NaN	NaN	NaN	NaN	24.179	NaN	23.756	23.6535	23.7943	23.8075	23.6328	23.6208	NaN	23.1699	NaN	24.0353	NaN	23.8361	23.6458	23.6251	23.5321	24.385	23.9652	23.7345	23.3427	23.5179
1	NaN	E9PU13;B2RYI6		Snx4	4	51.927	117170000	5	NaN	NaN	NaN	NaN	NaN	NaN	NaN	NaN	NaN	NaN	NaN	NaN	NaN	NaN	NaN	NaN	NaN	NaN	NaN	NaN	NaN	NaN	NaN	NaN	NaN	21.7437	NaN	NaN	NaN	NaN	NaN	NaN	NaN	NaN	NaN	NaN	NaN	NaN	NaN	NaN	NaN
0.000395715	-0.285396	B2RYJ7		Actr1b	15	42.281	6119900000	374	26.3179	26.1709	26.3146	26.1875	26.0611	26.1392	26.4853	26.2012	26.4478	26.5683	26.5318	26.3531	26.2888	26.336	26.1917	25.7431	26.3143	25.9829	26.9997	26.5862	26.8684	26.3467	26.1458	26.2245	26.4237	26.4588	26.5425	26.7521	26.8287	26.9132	26.5565	26.5759	26.5855	26.2764	26.2869	26.1599	26.2515	26.1418	26.0918	26.4912	26.6403
0.452667	-0.0357965	P18297;B2RYK3;D3ZT59	Sepiapterin reductase	Spr	8	28.128	2604300000	346	24.9724	24.9029	24.9503	25.537	25.5389	25.529	25.0169	25.1279	25.0041	25.1513	25.1691	25.2836	25.1524	25.2747	25.2124	25.4791	25.6971	24.4365	25.4369	25.3665	25.3373	25.1462	25.16	25.1774	25.3055	25.1974	25.1338	24.9834	24.8093	25.0146	25.0109	25.1655	25.1513	25.0962	25.0487	25.0555	25.1059	25.1082	25.1982	25.0049	25.1404
0.896394	0.0347304	B2RYK5		Slc35a2	2	40.918	309040000	94	NaN	22.2734	NaN	NaN	NaN	NaN	NaN	NaN	NaN	NaN	NaN	NaN	22.9847	NaN	NaN	NaN	NaN	NaN	NaN	NaN	NaN	22.7783	NaN	NaN	NaN	NaN	NaN	NaN	NaN	NaN	NaN	NaN	22.6661	NaN	NaN	NaN	22.8103	NaN	NaN	NaN	NaN
1	NaN	B2RYL7;F7EPZ4		Dis3	3	108.75	449100000	8	NaN	NaN	NaN	NaN	NaN	NaN	NaN	NaN	22.5525	NaN	NaN	NaN	NaN	NaN	NaN	NaN	NaN	NaN	NaN	NaN	NaN	NaN	NaN	NaN	NaN	NaN	NaN	NaN	NaN	NaN	NaN	NaN	NaN	NaN	NaN	NaN	NaN	NaN	NaN	NaN	NaN
1	NaN	B2RYL9;D3ZKG5		Parvb	1	19.239	20182000	0	NaN	NaN	NaN	NaN	NaN	NaN	NaN	NaN	NaN	NaN	NaN	NaN	NaN	NaN	NaN	NaN	NaN	NaN	NaN	NaN	NaN	NaN	NaN	NaN	NaN	NaN	NaN	NaN	NaN	NaN	NaN	NaN	NaN	NaN	NaN	NaN	NaN	NaN	NaN	NaN	NaN
0.495645	-0.138841	B2RYM5	Lys-63-specific deubiquitinase BRCC36	Brcc3	3	33.015	161050000	47	NaN	21.6643	NaN	NaN	22.5647	NaN	NaN	NaN	NaN	NaN	21.6052	NaN	NaN	22.1323	21.8709	NaN	NaN	NaN	NaN	NaN	NaN	21.8641	21.5975	21.7033	NaN	NaN	NaN	21.778	NaN	NaN	NaN	NaN	NaN	NaN	21.5091	NaN	NaN	NaN	NaN	NaN	22.0171
0.980246	0.00140635	B2RYN0;D3ZFX4		Pgm3	26	59.684	8374400000	734	26.7841	26.8008	26.6574	26.6604	26.7371	26.7841	26.8521	26.7936	26.7401	26.9382	26.8171	26.9225	26.8033	26.8644	26.7596	26.7927	26.9338	26.6975	27.0642	27.0075	26.9498	26.9622	26.8972	26.9376	27.0411	27.1284	27.121	26.5688	26.4851	26.4464	27.026	26.9665	27.1892	26.8234	26.8185	26.7824	27.0246	27.0456	27.0284	26.7637	26.752
0.683373	-0.0326385	B2RYN1		Fn3krp	3	34.169	469880000	26	NaN	23.3272	23.251	NaN	NaN	NaN	23.3012	23.2924	23.4381	23.0403	23.2296	23.1131	23.1895	23.331	23.2069	NaN	NaN	NaN	NaN	NaN	NaN	NaN	NaN	NaN	NaN	NaN	NaN	NaN	NaN	NaN	NaN	NaN	NaN	23.2503	23.157	23.2115	NaN	NaN	23.246	NaN	NaN
0.482499	-0.12125	B2RYN3		Eef1e1	6	19.842	623610000	33	NaN	NaN	23.3635	NaN	NaN	NaN	23.1233	NaN	23.3178	NaN	NaN	NaN	23.2661	NaN	NaN	NaN	NaN	NaN	NaN	NaN	NaN	23.3145	23.3988	23.4279	23.2276	22.9305	22.7657	NaN	NaN	NaN	NaN	NaN	NaN	23.7458	23.3448	23.3243	23.3496	NaN	NaN	NaN	NaN
0.0212159	0.190239	B2RYN6		Ap1g1	13	91.349	3252100000	247	25.3223	25.565	25.6817	25.5938	25.7854	25.8153	25.4376	25.4683	25.4476	25.4861	25.5586	25.4787	25.6632	25.588	25.6075	25.5038	NaN	NaN	25.2375	25.2425	25.1621	25.4745	25.439	25.3323	25.8277	25.7972	25.8137	25.2692	25.3019	25.5304	25.4622	25.5332	25.2866	25.409	25.2363	25.2763	25.5416	25.1993	25.3921	25.3761	25.3217
0.404466	-0.117516	B2RYP3		Fam91a1	2	93.573	95820000	12	NaN	NaN	NaN	NaN	NaN	NaN	NaN	21.6622	21.5368	NaN	NaN	NaN	NaN	NaN	NaN	NaN	NaN	NaN	NaN	NaN	NaN	NaN	NaN	NaN	NaN	NaN	NaN	NaN	NaN	NaN	NaN	NaN	NaN	NaN	NaN	NaN	21.3154	21.523	21.6076	NaN	NaN
0.129561	0.112472	B2RYP4		Snx2	17	58.53	3548100000	388	25.451	25.4973	25.4913	25.9972	25.8294	25.8492	25.6417	25.6285	25.5833	25.6012	25.5521	25.6337	25.5875	25.7072	25.7332	24.3271	25.2773	25.4857	25.542	25.4002	25.4777	25.6667	25.7486	25.7262	25.8644	26.099	25.9334	25.4704	25.5327	25.5016	25.2807	25.239	25.6544	25.5745	25.6105	25.4545	25.8039	25.8922	25.688	25.6929	25.6024
1	NaN	B2RYP5;Q9WVR7	Protein phosphatase 1F	Ppm1f	2	49.165	89039000	9	NaN	NaN	NaN	NaN	NaN	NaN	NaN	NaN	NaN	NaN	NaN	NaN	NaN	NaN	NaN	NaN	NaN	NaN	NaN	NaN	NaN	NaN	NaN	NaN	NaN	NaN	NaN	NaN	NaN	NaN	NaN	NaN	NaN	NaN	21.3166	NaN	NaN	NaN	NaN	NaN	NaN
0.00266891	0.278777	B2RYP6		Luc7l2	12	46.582	1941000000	265	24.7926	24.7455	24.5676	25.0814	24.783	24.7286	24.5755	24.6214	24.3966	24.8132	24.8832	24.8712	24.7577	24.8008	24.8402	24.9967	24.7331	25.7798	24.057	24.0362	24.1995	24.8521	24.7751	24.5888	24.7423	24.9598	24.8859	24.4941	24.5527	24.7755	24.7091	24.3662	24.0315	24.6954	24.6482	24.5793	24.6298	24.8443	24.8251	25.0736	24.766
0.381799	0.0693958	B2RYQ2	Serine/threonine-protein phosphatase 2A activator	Ppp2r4	11	36.617	3069100000	260	25.267	25.3838	25.4422	25.891	25.7415	25.7724	25.3438	25.3537	25.5538	25.2697	25.166	25.1313	25.44	25.5402	25.4135	26.1459	25.9275	25.9485	25.3171	25.2135	25.2895	25.2593	25.2999	25.234	25.4962	25.5318	25.6178	25.5925	25.6271	25.4737	24.9655	24.8002	24.9138	25.2401	25.2345	25.3261	25.3291	25.3147	25.1801	25.4156	25.7045
0.768875	-0.0264884	B2RYQ5;A0A0G2KAN5	Enhancer of rudimentary homolog	Erh	6	12.259	4153000000	248	25.6188	25.5532	25.589	26.0878	26.1177	26.1363	25.9667	25.9552	25.898	25.8374	25.7589	25.5731	25.8704	26.2502	25.8746	26.6119	26.1414	26.2751	25.6763	25.5955	26.0748	25.6541	25.6663	25.6669	26.1412	26.1591	26.1781	25.5916	25.6092	25.3526	25.5457	25.6164	25.7799	25.6358	25.587	25.6249	25.6551	25.4973	25.7711	26.1451	26.1311
1	NaN	P83883;B2RYQ8;F8WFR5	60S ribosomal protein L36a	Rpl36a;RGD1566373	2	12.441	393230000	63	NaN	NaN	NaN	NaN	NaN	NaN	NaN	NaN	NaN	NaN	NaN	21.0784	NaN	NaN	NaN	NaN	NaN	NaN	NaN	NaN	NaN	NaN	NaN	NaN	NaN	NaN	NaN	NaN	NaN	NaN	NaN	NaN	NaN	NaN	NaN	NaN	NaN	NaN	NaN	22.5376	22.3611
0.519326	-0.0851819	B2RYR8;P62243;M0R7Q5;Q6TXJ0;D3ZIE1	40S ribosomal protein S8	Rps8;LOC100363452;LOC297756;RGD1566369	15	24.205	8324500000	406	26.276	26.2238	26.2439	27.2175	27.0913	27.2391	27.2072	27.0384	27.0003	26.0686	26.242	26.121	26.5581	26.6974	26.5708	26.1757	26.1032	26.2768	26.7774	26.696	26.7735	26.9493	26.9717	27.0613	27.1612	27.2637	27.1928	26.9361	26.8942	27.0967	26.6751	26.6569	26.8098	26.7641	26.8823	26.8484	27.2806	27.1844	27.3411	27.4538	27.4375
0.652148	0.051413	B2RYR9;Q9Z336	Dynein light chain Tctex-type 1	Dynlt1	2	12.452	694460000	50	NaN	NaN	23.6984	NaN	23.5791	24.1187	23.7485	23.7907	23.7026	23.5844	23.2555	23.5085	23.6222	23.9621	23.7594	NaN	NaN	NaN	NaN	NaN	23.5922	NaN	NaN	23.5987	NaN	24.0681	NaN	23.8537	23.3031	23.6466	23.7253	23.5218	23.3922	23.782	23.5433	NaN	23.657	23.5532	23.5909	23.6788	NaN
0.287675	-0.138895	B2RYS0;P35171	Cytochrome c oxidase subunit 7A2, mitochondrial	Cox7a2	2	9.3529	4037800000	132	25.5137	25.6175	25.6401	26.6577	26.6859	26.4922	26.2049	25.9943	26.1248	26.6464	26.2922	26.6512	25.8803	25.8923	25.8283	NaN	NaN	NaN	25.8548	26.1072	26.0406	26.3346	26.0488	26.172	25.2665	25.3223	25.1357	25.5975	25.4039	NaN	25.4491	25.6306	25.8019	25.9238	25.8319	26.002	25.4346	25.5858	25.7797	25.7528	26.0693
0.566577	0.0714882	B2RYS2	Cytochrome b-c1 complex subunit 7	LOC685596	10	13.558	2347900000	207	24.9044	25.0701	25.1475	25.0432	25.0885	25.167	24.7848	24.7935	25.0863	25.3892	25.1104	25.3009	24.9705	24.714	24.5983	25.8903	26.1906	26.3087	24.4732	24.5784	24.647	25.5559	25.5906	25.4533	24.0439	24.04	24.6403	24.7457	25.011	24.833	24.9355	25.0366	25.1058	25.1266	25.0614	25.1122	24.7283	24.8467	24.5526	24.8214	24.9452
0.223416	-0.123454	B2RYS8		Ndufb8	5	21.959	1386700000	238	23.9655	23.8844	24.1816	24.8646	24.8291	24.9772	24.3133	24.5305	24.5175	24.4528	24.3606	24.3983	24.2022	24.3292	23.9231	24.9854	25.3113	25.1611	24.2558	24.406	24.3733	24.3752	24.5006	24.5267	24.1281	23.7878	NaN	24.5142	24.5655	24.4855	24.2684	24.4789	24.2047	24.2087	24.3247	24.2909	24.0579	23.5472	24.0672	24.6331	24.4628
1	NaN	B2RYS9		Trmt112	2	14.127	18315000	3	NaN	NaN	NaN	NaN	NaN	NaN	NaN	NaN	NaN	NaN	NaN	NaN	NaN	NaN	NaN	NaN	NaN	23.5007	NaN	NaN	NaN	NaN	NaN	NaN	NaN	NaN	NaN	NaN	NaN	NaN	NaN	NaN	NaN	NaN	NaN	NaN	NaN	NaN	NaN	NaN	NaN
0.169233	-0.317342	B2RYT0;M0R3S1		Mrps21;LOC100911433	2	10.6	105710000	43	21.2032	NaN	NaN	NaN	NaN	NaN	21.7457	21.6563	NaN	NaN	NaN	NaN	NaN	21.2626	NaN	NaN	NaN	NaN	21.7138	21.9185	NaN	21.938	NaN	22.2315	NaN	NaN	21.0449	NaN	NaN	NaN	NaN	NaN	NaN	NaN	21.0088	NaN	NaN	21.7101	NaN	NaN	21.7885
1	NaN	B2RYT5;D3ZYX8		Cox7a2l	4	12.651	174260000	22	NaN	NaN	NaN	23.5703	NaN	23.5746	22.7043	22.8278	NaN	NaN	NaN	23.1186	NaN	NaN	NaN	NaN	NaN	NaN	NaN	NaN	22.6093	NaN	NaN	NaN	NaN	NaN	NaN	NaN	22.7409	22.8344	NaN	NaN	NaN	NaN	NaN	22.6866	NaN	NaN	NaN	NaN	NaN
0.705482	0.0370988	B2RYT7		Hdhd3	7	27.794	1689600000	96	24.6871	24.333	24.8482	24.5725	24.7942	24.4175	24.792	24.8363	24.9206	24.1402	24.058	24.2523	24.9229	24.5146	24.7137	NaN	NaN	NaN	24.4168	24.7463	24.2897	24.6914	24.7519	24.0594	24.3995	24.5299	24.5541	24.9206	24.7323	24.8956	24.8799	25.0856	24.9879	24.4634	24.3831	24.7233	24.5954	24.8564	24.6654	24.3029	24.6066
0.0262994	0.168235	B2RYU2;P23358;A0A140TAC5;M0R4B6;D3ZJE2;D4A8N3	60S ribosomal protein L12	Rpl12;Rpl12-ps1	12	17.845	13692000000	541	27.6703	27.5171	27.5741	27.823	27.9425	27.9069	27.7396	27.8773	27.7482	27.5235	27.6328	27.6181	27.5708	27.6427	27.6137	26.8563	26.8716	26.6338	27.6123	27.6344	27.6639	27.482	27.6136	27.5522	27.7618	27.8801	27.8663	27.6285	27.5595	27.6073	27.3051	27.0837	27.1765	27.5827	27.5144	27.4446	27.8572	27.6794	27.6332	27.6897	27.7344
1	1.52914	B2RYV5;G3V6C3		RGD1562502;Pbdc1	3	22.063	107110000	21	NaN	NaN	NaN	NaN	22.4579	22.5548	NaN	NaN	NaN	NaN	NaN	NaN	NaN	NaN	NaN	NaN	NaN	NaN	NaN	NaN	NaN	NaN	22.3255	NaN	22.3685	NaN	NaN	NaN	NaN	NaN	NaN	NaN	NaN	NaN	NaN	NaN	NaN	NaN	NaN	NaN	22.5702
0.303209	0.172558	B2RYW4		Mrpl53	4	12.735	173080000	76	NaN	NaN	NaN	NaN	21.0773	NaN	21.7544	21.0216	NaN	NaN	21.9213	22.0003	21.8421	NaN	22.0614	NaN	NaN	NaN	NaN	NaN	21.2874	NaN	NaN	22.1537	NaN	NaN	NaN	NaN	NaN	NaN	21.7856	NaN	22.1417	22.6401	21.9415	22.0375	21.6071	21.9508	NaN	NaN	21.4192
1	NaN	B2RYW7		Srp14	1	12.51	419080000	31	NaN	NaN	NaN	NaN	NaN	NaN	NaN	NaN	NaN	NaN	NaN	NaN	NaN	NaN	NaN	NaN	NaN	NaN	NaN	NaN	NaN	NaN	NaN	NaN	NaN	NaN	NaN	NaN	NaN	NaN	NaN	NaN	NaN	NaN	NaN	NaN	NaN	NaN	NaN	NaN	NaN
1	NaN	B2RYW8	MICOS complex subunit Mic10	Minos1	2	8.5498	135870000	9	NaN	NaN	NaN	NaN	NaN	NaN	NaN	NaN	NaN	NaN	NaN	NaN	NaN	NaN	NaN	NaN	NaN	23.0875	NaN	NaN	NaN	NaN	NaN	NaN	NaN	NaN	NaN	NaN	NaN	NaN	NaN	NaN	NaN	NaN	NaN	NaN	NaN	NaN	NaN	NaN	NaN
0.841679	-0.0176998	B2RYW9	Fumarylacetoacetate hydrolase domain-containing protein 2	Fahd2	9	34.581	982010000	136	23.345	23.748	23.9156	24.0333	23.8883	23.8993	23.866	23.7936	23.9643	23.8169	23.7896	23.8242	23.5828	23.756	23.8644	24.1193	NaN	NaN	23.0087	23.6419	23.9851	23.4973	23.6526	23.7352	23.7502	23.6766	23.7603	23.9733	24.0226	24.0288	23.8442	23.2034	23.5106	23.7214	23.2855	23.7013	23.5142	23.4855	23.4345	23.887	23.889
1	NaN	B2RZ08		Tmem263	1	11.549	116970000	4	NaN	NaN	NaN	NaN	NaN	NaN	NaN	NaN	NaN	NaN	NaN	NaN	NaN	NaN	NaN	NaN	NaN	NaN	NaN	NaN	NaN	NaN	NaN	NaN	NaN	NaN	NaN	NaN	NaN	NaN	NaN	NaN	NaN	NaN	NaN	NaN	NaN	NaN	NaN	NaN	NaN
0.0678064	0.161558	B2RZ09;P0C5H9	Mesencephalic astrocyte-derived neurotrophic factor	Manf	9	20.388	1785900000	83	24.9811	24.8007	24.7585	24.9669	25.0461	24.9135	24.9552	24.4694	24.7121	24.6297	24.7049	24.9061	24.9014	24.6906	24.7116	24.7713	NaN	NaN	24.0484	24.6861	24.5983	24.6047	24.6415	24.6967	24.1501	24.539	24.3653	24.422	24.6375	24.5519	24.3538	24.3743	24.605	24.3633	24.7607	24.4736	24.6579	24.8867	24.7449	24.7624	24.6763
1	NaN	F1M8F0;B2RZ14		Rbm7	2	22.789	4832100	4	NaN	NaN	NaN	NaN	NaN	NaN	NaN	NaN	NaN	NaN	NaN	NaN	NaN	NaN	NaN	NaN	NaN	21.6637	NaN	NaN	NaN	NaN	NaN	NaN	NaN	NaN	NaN	NaN	NaN	NaN	NaN	NaN	NaN	NaN	NaN	NaN	NaN	NaN	NaN	NaN	NaN
0.0259901	-0.0881447	B2RZ24;F1LM47	Succinyl-CoA ligase subunit beta	Sucla2	23	47.387	9910300000	670	27.0141	26.8987	26.8816	27.0156	27.1844	27.1505	27.1806	27.1331	27.1169	27.1504	27.1196	27.2792	27.099	27.0767	27.0589	26.1433	26.64	26.056	27.3411	27.2493	27.231	27.1077	27.1558	27.2185	27.1677	27.0881	27.1422	27.1742	27.1397	27.1399	26.9706	27.0216	26.9982	27.116	27.0038	27.0833	27.0522	27.1306	27.2111	27.1849	27.0731
0.712578	-0.0366431	B2RZ27		Sh3bgrl3	3	10.477	1821400000	77	24.7808	24.5709	24.6404	24.5061	24.76	NaN	24.609	24.566	24.6923	24.3213	24.4014	24.3288	24.9188	24.7895	25.2134	24.5483	24.5776	24.5641	24.8954	24.8895	24.6979	24.5719	24.8103	24.4243	24.9199	25.1151	25.1055	24.7758	25.2235	25.1088	24.5846	24.4726	24.693	24.6943	22.3924	NaN	24.2652	24.4123	24.3125	24.3492	24.8174
1	NaN	D3ZNX9;B2RZ29		Mapk1ip1l	1	23.617	175820000	26	NaN	NaN	NaN	NaN	NaN	NaN	NaN	NaN	NaN	NaN	NaN	NaN	NaN	NaN	NaN	NaN	NaN	NaN	NaN	NaN	NaN	NaN	NaN	NaN	NaN	NaN	NaN	NaN	NaN	NaN	NaN	NaN	NaN	NaN	NaN	NaN	NaN	NaN	NaN	NaN	NaN
0.47781	0.0931697	B2RZ37	Receptor expression-enhancing protein 5	Reep5	6	21.431	3074100000	107	25.5031	25.7384	25.843	NaN	NaN	NaN	25.4192	25.5083	25.559	NaN	24.2677	NaN	25.4041	25.6341	25.5092	NaN	NaN	NaN	24.6575	24.5763	24.6535	25.6603	25.64	25.4418	25.5495	25.4556	25.6786	25.5252	25.3389	25.6311	25.8014	25.7285	25.7066	25.0611	25.5477	25.6855	25.0212	25.2365	25.2282	NaN	25.9632
1	NaN	B2RZ57		Mrpl18	3	20.65	80416000	16	NaN	NaN	NaN	NaN	NaN	NaN	NaN	NaN	NaN	NaN	NaN	NaN	NaN	NaN	NaN	NaN	NaN	NaN	NaN	NaN	NaN	NaN	NaN	NaN	NaN	21.338	NaN	NaN	NaN	NaN	NaN	NaN	NaN	NaN	NaN	NaN	NaN	NaN	NaN	NaN	NaN
1	NaN	G3V9Y9;B2RZ62		Ap3s1	1	18.135	89661000	48	NaN	NaN	NaN	NaN	NaN	NaN	NaN	NaN	NaN	NaN	NaN	NaN	NaN	NaN	NaN	NaN	NaN	NaN	NaN	NaN	NaN	NaN	NaN	NaN	NaN	NaN	NaN	NaN	NaN	NaN	NaN	NaN	NaN	NaN	NaN	NaN	NaN	NaN	NaN	NaN	NaN
1	NaN	B2RZ68		Dcaf7	2	38.926	74300000	9	NaN	NaN	NaN	NaN	NaN	NaN	NaN	NaN	NaN	NaN	NaN	NaN	NaN	NaN	NaN	NaN	NaN	NaN	NaN	NaN	NaN	NaN	NaN	NaN	NaN	NaN	NaN	NaN	NaN	NaN	NaN	NaN	NaN	NaN	NaN	NaN	NaN	NaN	NaN	NaN	NaN
0.00568335	-0.121355	B2RZ72		Arpc4	12	19.667	11432000000	424	27.2481	27.1751	27.2322	27.6684	27.5454	27.5681	27.4579	27.4413	27.3223	27.259	27.3207	27.3357	27.3295	27.2038	27.3391	25.7167	25.6186	25.593	27.6988	27.5071	27.6014	27.2907	27.2783	27.2609	27.5243	27.371	27.3324	27.4633	27.4724	27.3538	27.4273	27.4155	27.4148	27.2764	27.2948	27.3576	27.3301	27.3554	27.2922	27.394	27.3365
0.00741122	0.200481	B2RZ74;D3Z8H0		Snrnp70	14	52.133	1522800000	182	24.2562	24.2888	24.418	23.7314	23.8073	24.0984	24.237	24.0547	24.4896	24.6094	24.6246	24.5884	24.4686	24.5012	24.5206	24.3761	24.4955	24.1945	NaN	23.9036	24.1671	24.4428	24.5729	24.3645	24.5229	24.7608	24.347	23.5538	23.757	23.5197	24.2855	24.1101	24.3795	24.5026	24.0906	24.4782	24.5312	24.5731	24.5569	24.2539	24.0011
0.251332	0.270473	B2RZ77;D4A9H2;A0A096MK50		Dpt	4	24.203	213080000	16	22.8616	22.5747	22.5307	NaN	NaN	22.0913	NaN	NaN	21.8704	NaN	22.1803	NaN	22.3246	NaN	22.0569	NaN	NaN	NaN	NaN	NaN	NaN	22.5676	22.5478	22.4986	NaN	NaN	NaN	NaN	NaN	NaN	NaN	21.7516	NaN	21.9657	NaN	NaN	NaN	NaN	NaN	NaN	NaN
0.238025	0.101719	B2RZ78;A0A0G2JTS3	Vacuolar protein sorting-associated protein 29	Vps29	9	20.468	3070100000	237	25.2757	25.3187	25.5208	25.4028	25.6061	25.4942	25.3709	25.3492	25.4022	25.4524	25.4023	25.6044	25.4239	25.3894	25.458	24.8554	NaN	NaN	25.0969	24.9092	25.0933	25.3782	25.3588	25.4081	25.4906	25.4432	25.6046	25.3907	25.1478	25.3318	25.0195	24.968	24.9638	25.4631	25.235	25.3457	25.501	25.4902	25.4235	25.2362	25.2663
1	NaN	B2RZ79		Iscu	2	17.967	12558000	5	NaN	NaN	NaN	NaN	NaN	NaN	NaN	NaN	NaN	NaN	NaN	NaN	NaN	NaN	NaN	NaN	NaN	NaN	NaN	NaN	NaN	NaN	NaN	NaN	NaN	NaN	NaN	NaN	NaN	NaN	NaN	NaN	NaN	NaN	NaN	NaN	NaN	NaN	NaN	NaN	NaN
0.0603812	0.267549	B2RZ97;F1LRJ0;A0A0G2JX46		Kcmf1	2	41.805	44257000	17	NaN	NaN	NaN	NaN	NaN	NaN	20.4803	NaN	20.6376	21.0801	20.778	20.8896	NaN	20.9329	20.7873	NaN	NaN	NaN	NaN	NaN	NaN	NaN	NaN	NaN	NaN	NaN	NaN	NaN	NaN	NaN	NaN	NaN	NaN	NaN	20.5239	NaN	NaN	NaN	20.7592	NaN	NaN
0.0304326	0.20217	F1LNS2;B2RZA3		Fam45a	3	40.366	233940000	82	21.9137	22.1917	NaN	NaN	22.5482	22.4865	21.8284	21.9661	NaN	22.0968	22.4015	22.6079	22.1527	22.2747	21.7353	NaN	NaN	NaN	21.5499	NaN	NaN	21.9223	21.6497	21.7723	22.0381	22.0992	22.0308	NaN	NaN	21.9064	NaN	NaN	NaN	NaN	NaN	21.9171	22.2751	22.034	NaN	NaN	21.7449
0.33148	-0.085752	B2RZA4;D3ZRP6		Ap1m2	20	48.182	2968800000	217	25.101	25.1538	25.1289	25.3867	25.3726	25.2847	25.277	25.388	25.4212	25.3882	25.355	25.5044	25.2136	25.3185	25.2127	26.146	26.3087	26.2208	25.4108	25.5954	25.5813	25.3314	25.3725	25.3622	25.1227	24.9004	25.0037	25.3906	25.0513	25.0154	25.4807	25.3635	25.3931	24.9475	24.8715	25.1029	25.2774	25.3368	25.4744	25.6283	25.3849
1	NaN	B2RZA6;G3V6G5		Tbl1x	3	53.609	2405600	3	NaN	NaN	NaN	NaN	NaN	NaN	NaN	NaN	NaN	NaN	NaN	NaN	NaN	NaN	NaN	NaN	NaN	NaN	NaN	NaN	NaN	NaN	NaN	NaN	NaN	NaN	NaN	NaN	NaN	NaN	NaN	NaN	NaN	NaN	NaN	NaN	NaN	NaN	NaN	NaN	NaN
0.0415122	0.239777	B2RZA9		Ube2l3	10	17.861	6695800000	333	26.4156	26.5211	26.6288	26.7836	26.7944	26.8176	26.7032	26.6756	26.6497	26.6051	26.6267	26.6157	26.5456	26.5832	26.6611	24.8254	NaN	NaN	25.7802	25.8674	25.7511	26.3752	26.3976	26.4859	26.8367	26.8818	26.8282	26.7953	26.5716	26.6998	26.0894	25.9123	26.0169	26.5365	26.5754	26.6447	26.6786	26.5953	26.5296	26.7327	26.6752
0.125494	0.135119	B2RZB5		Chmp2a	7	25.134	425980000	48	22.7702	22.5654	22.577	20.4352	NaN	21.5181	22.7831	22.4063	22.4068	22.5796	23.0328	22.6836	22.5241	22.6871	22.3817	NaN	NaN	NaN	22.3819	22.1592	22.3223	22.8452	22.8793	22.8029	22.5563	22.9292	22.7839	21.5177	NaN	21.3818	22.784	23.194	22.8686	23.086	22.6924	23.1915	22.6265	22.5675	22.8832	21.75	21.9426
0.056401	0.177607	B2RZB6		Lsm8	3	10.403	732610000	91	23.3426	23.3302	23.4846	NaN	NaN	22.6005	23.7638	23.5053	23.469	23.4294	23.5692	23.6633	23.4173	23.6025	23.655	NaN	NaN	NaN	22.5049	23.5088	23.4427	NaN	NaN	23.0892	23.5757	23.8697	23.8108	23.0419	22.9739	22.7647	23.1248	23.1247	NaN	23.2278	23.4874	23.3578	23.4983	23.5226	23.6338	23.2064	22.9518
0.13505	-0.128054	B2RZB7		Snrpd1	3	13.281	2053500000	93	24.4112	24.7894	24.5292	25.0957	25.1071	24.9669	24.9921	25.0874	24.5891	25.2799	25.1675	24.9243	24.6829	24.9234	24.7433	24.1284	24.274	23.8019	25.4192	25.2426	25.2152	24.998	24.8219	24.8931	24.8064	24.9936	25.1284	24.595	24.8599	24.7595	24.9194	24.9764	24.7526	24.7178	24.3322	24.655	25.0029	25.0089	24.9762	24.8428	24.975
1	NaN	B2RZB8		Psmg4	1	13.743	13419000	0	NaN	NaN	NaN	NaN	NaN	NaN	NaN	NaN	NaN	NaN	NaN	NaN	NaN	NaN	NaN	NaN	NaN	NaN	NaN	NaN	NaN	NaN	NaN	NaN	NaN	NaN	NaN	NaN	NaN	NaN	NaN	NaN	NaN	NaN	NaN	NaN	NaN	NaN	NaN	NaN	NaN
0.472278	0.274785	B2RZC1;P04916	Retinol-binding protein 4	Rbp4	4	23.22	217630000	26	NaN	22.4017	NaN	22.2652	22.4497	22.1681	NaN	NaN	NaN	NaN	22.1601	22.1699	21.9116	NaN	NaN	NaN	NaN	NaN	NaN	21.6417	NaN	22.6464	22.3773	22.5649	22.5649	22.5804	22.1411	22.1835	22.3305	NaN	NaN	NaN	NaN	NaN	NaN	21.9662	NaN	21.4058	NaN	21.9656	22.1941
0.00719543	-0.164194	B2RZC6;A0A0H2UHX8;Q7TP98	Interleukin enhancer-binding factor 2	Ilf2	12	43.062	3169900000	310	25.1925	25.3131	25.4117	25.5813	25.5968	25.6705	25.4605	25.4421	25.4901	25.3585	25.5204	25.4442	25.2781	25.22	25.2346	26.4235	25.5736	25.4134	25.8642	25.7662	25.8781	25.3087	25.2931	25.4554	25.4103	25.4425	25.4447	25.3767	25.3847	25.3772	25.3044	25.4977	25.3606	25.2445	25.2914	25.2235	25.4792	25.3901	25.4202	25.4271	25.4856
0.0224403	0.236679	B2RZD1		Sec61b	5	9.9884	910120000	164	23.9108	24.0643	24.0244	22.0854	22.3339	22.3217	23.5792	23.7568	23.8886	23.35	23.4996	23.2915	23.8476	24.0424	23.8686	24.706	24.8991	24.9529	22.956	23.0569	23.189	24.2647	24.2185	24.1789	23.5453	23.2679	23.4477	22.6622	23.1839	23.284	24.0155	23.7355	23.9308	24.0364	24.2905	24.1135	23.7543	23.8183	23.9207	23.294	23.0718
0.0816198	-0.227506	D3ZSF9;B2RZD5		Rpl22l2;LOC688712	3	14.441	678080000	57	22.9508	23.2367	23.3502	23.3171	23.2954	23.1286	23.556	23.6839	23.7179	NaN	23.5046	NaN	23.2123	23.2298	23.2932	NaN	NaN	NaN	23.6461	23.9802	23.7019	23.5373	23.5739	23.7007	23.7491	23.5724	23.6875	23.3406	23.2299	22.9462	23.0096	NaN	23.0899	23.6521	24.0472	24.0155	NaN	23.567	23.1158	23.4214	23.9675
0.148785	0.184781	B3DM90;Q8CGU6	Nicastrin	Ncstn	2	67.169	358100000	47	22.561	22.55	22.8643	23.3625	23.146	23.2231	NaN	NaN	NaN	22.5131	NaN	NaN	NaN	22.5662	NaN	NaN	NaN	NaN	22.6202	22.4757	22.6033	22.7539	22.8591	22.1721	NaN	22.4447	22.3104	22.6617	NaN	22.937	NaN	NaN	22.6949	22.5484	22.7118	22.6954	NaN	22.8549	22.7841	22.7266	22.6913
0.587081	-0.0689578	B3DM93;Q9JID1	Programmed cell death protein 4	Pdcd4	12	51.736	1828700000	130	24.5734	24.777	24.6467	25.4751	23.944	24.6475	24.4839	24.4747	24.4664	24.6575	24.6589	24.7395	24.7685	24.7513	24.812	NaN	NaN	NaN	24.2436	24.6302	24.4706	24.9475	24.9784	24.9279	24.9561	24.7093	24.8028	24.8915	24.4228	24.6429	24.9903	24.3221	24.2722	24.8544	24.7941	24.8169	24.8084	24.6527	24.529	24.2487	24.8731
0.677917	0.0374903	B3DM95;P04550	Parathymosin	Ptms	4	11.559	8710500000	153	27.1131	27.4308	27.3652	22.0701	24.0001	21.8651	27.0268	27.0506	27.074	26.7549	26.7843	26.9046	27.2311	27.3868	27.4262	25.6387	27.3733	27.4665	27.1728	26.9207	27.074	26.871	26.7747	26.8072	26.7908	26.6698	26.8044	26.5273	26.5906	26.5948	27.1765	27.27	27.183	26.9181	26.8435	26.7127	26.8005	27.0259	27.0268	26.0182	26.4863
0.658945	0.0713596	B3DMA2	Acyl-CoA dehydrogenase family member 11	Acad11	15	87.37	1478800000	132	24.1903	24.217	24.3675	24.0745	23.8798	23.8159	24.3842	24.4052	24.1526	24.5456	24.5568	24.5035	24.2542	24.1072	24.2908	25.5609	24.2875	NaN	25.2632	25.1317	24.4867	24.2981	24.283	24.3208	24.7361	24.8291	24.5091	24.7352	24.5964	24.3528	24.2261	24.2989	24.7816	23.9071	23.9739	23.8604	24.2907	24.1453	24.4106	24.6813	24.6282
1	NaN	B3DMA5		Cnot7	1	32.718	29757000	5	NaN	NaN	NaN	NaN	NaN	NaN	NaN	NaN	NaN	NaN	NaN	NaN	NaN	NaN	NaN	NaN	NaN	NaN	NaN	NaN	NaN	NaN	NaN	NaN	NaN	NaN	NaN	NaN	NaN	NaN	NaN	NaN	NaN	NaN	NaN	NaN	NaN	NaN	NaN	NaN	NaN
0.986936	-0.0022687	F1MA86;M0R423;B3GS92;Q03555	Gephyrin;Molybdopterin adenylyltransferase;Molybdopterin molybdenumtransferase	Gphn	6	67.314	285320000	70	NaN	NaN	NaN	NaN	NaN	NaN	22.1888	22.6288	22.5789	22.2087	22.0928	22.1894	NaN	22.3395	22.6949	NaN	NaN	NaN	NaN	NaN	NaN	22.0843	22.5278	22.3137	NaN	NaN	NaN	NaN	NaN	NaN	NaN	NaN	NaN	NaN	22.168	NaN	NaN	22.0622	NaN	NaN	NaN
0.0674093	0.304641	B3SVE9;Q64232	Very-long-chain enoyl-CoA reductase	Tecr	8	36.122	590270000	114	22.71	22.9752	23.3369	23.0992	NaN	23.0233	23.0005	23.0185	22.8541	22.9766	23.0434	22.6206	22.7449	22.9785	22.8635	22.2527	NaN	22.9448	NaN	22.0122	22.6672	23.3104	23.6217	23.3246	NaN	23.1211	22.8458	22.5507	22.9507	22.4694	NaN	21.4457	23.5721	23.2711	23.096	23.1427	23.2845	23.0906	23.1433	23.2829	23.3581
0.0626751	-0.45141	B3Y9H3;P05943	Protein S100-A10	S100a10	5	11.075	2875200000	234	25.4448	25.5611	25.6551	25.9326	25.8496	25.9758	25.5317	25.3985	25.3975	25.7628	25.8024	25.8268	25.2131	25.4786	24.8729	25.9072	25.6254	25.7096	25.4345	25.3624	25.2848	25.4284	25.3222	25.547	23.377	23.486	23.1886	26.0328	26	25.8341	25.1469	25.2468	25.0392	25.2069	25.3013	25.1027	24.9506	24.8385	24.8345	25.7151	25.22
0.806983	0.0107361	D3ZCR3;B4F758;P63159;A0A0G2K6P4;D3ZXR5;D3ZGW6;D3ZC69;M0R7R5;D4A6A9;D3ZLG3;A0A0G2K6M3;A0A0G2KA73;F1M4J9;F1M6B2	High mobility group protein B1	Hmg1l1;Hmgb1	19	24.677	16830000000	697	27.5828	27.6759	27.6582	26.6113	26.923	26.6053	27.8135	27.6733	27.7032	28.0983	28.0377	28.1748	27.9654	27.8493	27.9714	28.2371	28.2678	28.1808	27.8952	27.8985	27.8748	28.0658	28.0044	28.0276	28.0395	27.9813	27.9748	27.4071	27.2982	27.2988	27.8719	27.7984	27.8024	27.8658	27.9778	27.8971	27.9383	27.9104	27.8787	27.5931	27.5055
1	NaN	B4F763;D3ZPE5		Vps53	1	91.127	48948000	15	NaN	NaN	NaN	NaN	NaN	NaN	NaN	NaN	NaN	NaN	NaN	NaN	NaN	NaN	NaN	NaN	NaN	NaN	NaN	NaN	NaN	NaN	NaN	NaN	NaN	NaN	NaN	NaN	NaN	NaN	NaN	NaN	NaN	NaN	NaN	NaN	NaN	NaN	NaN	NaN	NaN
0.0143265	0.204792	B4F764;Q4KM65	Cleavage and polyadenylation specificity factor subunit 5	Nudt21	12	26.24	1389200000	244	24.1444	24.1911	24.2416	24.0708	24.2008	24.2422	24.1069	23.9092	23.8975	24.3372	24.1694	24.1088	24.2879	24.2471	24.3869	24.4448	24.1638	24.2728	24.007	23.9303	23.9166	24.3649	24.2602	24.6213	24.5643	24.5947	24.5295	24.2873	24.1465	24.4921	24.2811	24.1099	24.3403	24.1914	24.2119	24.2089	24.1952	24.1314	23.9763	24.2198	24.4204
0.00715643	-0.224211	B4F768		Aldh4a1	11	62.951	864120000	177	23.2156	23.3882	23.5197	24.3958	23.9533	24.1399	23.4952	23.4247	23.5413	23.6018	23.6925	23.561	23.2603	23.3163	23.1181	24.617	24.7162	23.9657	23.8047	23.8576	23.672	23.581	23.3108	23.4598	23.6256	23.2447	23.3295	23.7058	24.0201	23.4747	23.8143	23.789	23.5478	23.5866	23.5577	23.5142	23.5579	24.1108	23.5869	23.5434	23.5148
1	NaN	B4F769	SWI/SNF-related matrix-associated actin-dependent regulator of chromatin subfamily A-like protein 1	Smarcal1	2	101.21	199140000	1	NaN	NaN	NaN	NaN	NaN	NaN	NaN	NaN	NaN	NaN	NaN	NaN	NaN	NaN	NaN	NaN	NaN	NaN	NaN	NaN	NaN	NaN	NaN	NaN	NaN	NaN	NaN	NaN	NaN	NaN	NaN	NaN	NaN	NaN	NaN	NaN	NaN	NaN	NaN	NaN	NaN
0.10838	-0.467138	B4F772;F7F2F3		Hspa4l	7	94.22	192620000	16	NaN	NaN	NaN	NaN	NaN	NaN	NaN	NaN	NaN	NaN	NaN	NaN	21.8856	NaN	NaN	NaN	NaN	NaN	NaN	23.0181	NaN	NaN	NaN	NaN	21.988	NaN	NaN	NaN	NaN	NaN	22.1893	NaN	NaN	NaN	NaN	NaN	NaN	22.1851	NaN	22.0105	NaN
1	NaN	B4F775		Gopc	2	34.167	171570000	1	NaN	NaN	NaN	NaN	NaN	NaN	NaN	NaN	NaN	NaN	NaN	NaN	NaN	NaN	NaN	NaN	NaN	NaN	NaN	NaN	NaN	NaN	NaN	NaN	NaN	NaN	NaN	NaN	NaN	NaN	NaN	NaN	NaN	NaN	NaN	NaN	NaN	NaN	NaN	NaN	NaN
0.501218	0.06477	M0R5F8;B4F777	High mobility group nucleosome-binding domain-containing protein 5	Hmgn5	7	45.46	1111600000	156	23.6649	23.778	23.6714	23.3558	23.9488	23.9664	23.8012	23.9476	23.6257	24.014	24.0687	23.9193	24.3064	23.7862	24.2572	NaN	NaN	NaN	23.7464	23.7397	23.5572	24.0454	24.2627	24.0764	24.1711	23.8959	23.9935	23.702	23.7266	23.574	24.0123	23.8543	23.7093	23.8751	23.7445	24.0023	24.1575	23.5854	23.9346	23.2943	23.3611
1	NaN	B4F779		Appl2	8	74.116	273690000	22	NaN	NaN	NaN	NaN	NaN	NaN	NaN	22.1058	22.2368	NaN	NaN	NaN	NaN	NaN	NaN	NaN	NaN	NaN	NaN	NaN	NaN	NaN	NaN	NaN	NaN	NaN	NaN	NaN	NaN	NaN	NaN	NaN	NaN	NaN	NaN	NaN	NaN	NaN	NaN	NaN	NaN
0.298798	0.189805	B4F793;B4F7A0;B2GV27;Q62772		Tnxb	19	158.93	3214100000	295	25.2673	25.527	25.5478	25.9551	25.4199	25.4672	25.5567	25.3295	25.3036	25.1838	25.1087	24.9678	25.2966	25.1513	25.3626	23.6257	25.2117	23.6262	23.6413	24.621	24.6959	24.9065	24.9044	24.9205	25.841	25.8001	25.5948	25.8361	25.7205	25.8112	24.8577	24.7033	NaN	25.3339	25.2682	25.4209	25.1638	25.0926	25.0935	25.4417	25.3287
1	NaN	B4F7A2;F1M943		Armc8	3	75.301	40260000	7	NaN	NaN	NaN	NaN	NaN	NaN	NaN	NaN	NaN	NaN	NaN	NaN	NaN	NaN	NaN	NaN	NaN	NaN	NaN	NaN	NaN	NaN	NaN	NaN	NaN	NaN	NaN	NaN	NaN	NaN	NaN	NaN	NaN	NaN	NaN	NaN	NaN	NaN	NaN	NaN	NaN
0.104294	-0.164574	Q4L2A2;B4F7A5		Cd99	1	16.544	517520000	48	NaN	NaN	NaN	23.3938	23.4849	23.5578	NaN	NaN	23.4179	23.0575	23.1052	NaN	NaN	23.2621	NaN	24.0882	24.257	NaN	23.5561	23.464	NaN	NaN	NaN	NaN	NaN	NaN	NaN	23.364	23.5216	23.5161	23.4672	23.3412	23.5475	NaN	NaN	NaN	NaN	NaN	23.4158	23.2869	NaN
1	NaN	B4F7A9		Csnk2a2	3	41.201	178800000	45	NaN	21.9581	NaN	NaN	NaN	NaN	NaN	NaN	NaN	NaN	NaN	NaN	NaN	NaN	NaN	NaN	NaN	NaN	NaN	NaN	NaN	NaN	22.0314	NaN	NaN	NaN	NaN	22.1636	22.4742	22.5413	NaN	NaN	NaN	22.5946	NaN	22.6288	NaN	NaN	NaN	NaN	22.4854
1	NaN	B4F7B2		Taf10	1	21.778	5398600	8	NaN	NaN	NaN	NaN	NaN	NaN	NaN	NaN	NaN	NaN	NaN	NaN	NaN	NaN	NaN	NaN	NaN	NaN	NaN	NaN	NaN	NaN	NaN	NaN	NaN	NaN	NaN	NaN	NaN	NaN	NaN	NaN	NaN	NaN	NaN	NaN	NaN	NaN	NaN	NaN	NaN
1	NaN	B4F7C2		Tubb4a	2	49.585	14951000	3	NaN	NaN	NaN	NaN	NaN	NaN	NaN	NaN	NaN	NaN	NaN	NaN	NaN	NaN	NaN	NaN	NaN	NaN	NaN	NaN	NaN	NaN	NaN	NaN	NaN	NaN	NaN	NaN	NaN	NaN	NaN	NaN	NaN	NaN	NaN	NaN	NaN	NaN	NaN	NaN	NaN
1	NaN	B4F7C7		Hebp1	2	21.124	34541000	2	NaN	NaN	NaN	NaN	NaN	NaN	NaN	NaN	NaN	NaN	NaN	NaN	NaN	NaN	NaN	NaN	NaN	NaN	NaN	NaN	NaN	NaN	NaN	NaN	NaN	NaN	NaN	NaN	NaN	NaN	NaN	NaN	NaN	NaN	NaN	NaN	NaN	NaN	NaN	NaN	NaN
1	NaN	P50430;B4F7E2;A0JPJ3	Arylsulfatase B	Arsb	4	58.958	367960000	38	NaN	NaN	NaN	NaN	NaN	NaN	23.4405	NaN	22.831	NaN	22.9777	23.0374	NaN	NaN	NaN	NaN	NaN	NaN	NaN	NaN	NaN	NaN	NaN	NaN	NaN	NaN	NaN	NaN	NaN	NaN	NaN	NaN	NaN	NaN	NaN	NaN	NaN	NaN	NaN	NaN	NaN
0.291875	-0.0659044	B4F7E8;Q3MHT9	Niban-like protein 1	Fam129b	16	84.73	1928700000	203	24.6372	24.5899	24.6398	24.793	24.7557	24.7118	24.5873	24.7146	24.7612	24.9482	24.7731	24.8439	24.3533	24.7603	24.746	NaN	NaN	NaN	24.7431	24.7969	24.656	24.4331	24.5687	24.8815	24.6752	24.6972	25.0001	24.7623	24.8992	25.0195	24.7632	24.6399	24.5035	24.5125	24.6522	24.5469	24.8848	24.7417	24.7457	24.8467	25.0224
1	-0.11801	B5DEH0	LIM domain-containing protein 1	Limd1	4	71.392	142880000	21	22.1048	NaN	NaN	NaN	NaN	NaN	NaN	22.1262	NaN	NaN	NaN	22.2667	22.0433	21.8764	NaN	NaN	NaN	NaN	NaN	NaN	NaN	NaN	22.0188	22.6184	NaN	NaN	NaN	NaN	22.094	21.9611	NaN	NaN	NaN	NaN	21.7711	NaN	NaN	NaN	NaN	22.0564	22.2421
0.25168	0.110587	B5DEH2	Erlin-2	Erlin2	10	37.71	1644000000	197	24.8511	24.8723	24.8618	23.8381	24.0346	24.0699	24.7392	24.8821	24.5688	23.9754	24.2799	24.1749	24.7846	24.5769	24.7218	NaN	NaN	NaN	24.7801	24.7233	24.1075	24.9974	25.0039	24.8633	24.5699	24.5104	24.2342	24.4011	24.4929	24.6933	24.6597	24.7025	25.2935	24.7041	24.8271	24.9863	24.7993	24.6612	24.5711	24.6382	24.6609
0.998533	-0.000179291	B5DEH4		Uap1l1	5	56.435	497800000	95	22.7455	22.4042	22.3999	23.0396	23.3525	23.2996	23.0186	23.4232	22.7126	22.7963	23.0843	22.9325	22.7368	22.644	22.5708	NaN	NaN	NaN	22.4926	22.6696	22.7805	22.6293	22.3243	22.5307	23.2755	23.1163	22.859	22.836	22.8483	23.104	22.5137	22.6982	22.4783	22.5166	22.5905	22.3686	22.8787	22.4745	22.8041	23.1091	22.7646
1	NaN	B5DEI0		Pcyox1l	2	54.633	91561000	8	NaN	NaN	NaN	NaN	NaN	NaN	NaN	NaN	NaN	NaN	NaN	NaN	NaN	NaN	NaN	NaN	NaN	NaN	NaN	NaN	NaN	NaN	NaN	NaN	NaN	NaN	NaN	NaN	NaN	NaN	NaN	NaN	NaN	NaN	NaN	NaN	NaN	NaN	NaN	NaN	NaN
0.344284	0.127128	B5DEJ5;D3Z9S4		Eefsec	6	63.659	114180000	26	NaN	NaN	NaN	NaN	NaN	NaN	21.0387	21.1141	21.317	21.3339	NaN	21.4684	21.3109	21.6697	21.1876	NaN	NaN	NaN	NaN	NaN	NaN	NaN	NaN	NaN	21.9004	21.4038	21.3268	20.6587	NaN	20.9007	NaN	NaN	NaN	NaN	20.9065	NaN	21.552	NaN	NaN	NaN	NaN
0.0160566	-0.352921	B5DEJ6		Tpk1	5	27.207	400390000	17	22.6164	NaN	NaN	NaN	NaN	NaN	NaN	NaN	NaN	NaN	NaN	NaN	NaN	22.7734	NaN	NaN	NaN	NaN	NaN	NaN	NaN	22.835	22.7586	NaN	NaN	NaN	NaN	23.1983	23.562	23.1789	NaN	NaN	NaN	NaN	NaN	NaN	NaN	NaN	NaN	NaN	NaN
0.545929	-0.0589186	B5DEK0		Rprd1b	6	36.883	846850000	188	23.6433	23.6694	23.8339	24.0257	23.7949	23.903	23.6219	23.6107	23.5484	23.4228	23.6995	23.4992	23.5478	23.2076	23.4054	NaN	NaN	NaN	23.842	23.9941	23.8377	23.7704	23.7617	23.5413	23.8247	23.9096	23.877	23.5485	23.8676	23.8547	23.9127	23.6544	23.6387	23.5702	23.4446	23.5453	23.6477	23.4015	23.6739	23.7293	23.6484
1	NaN	B5DEK2;D4A4G3		Ttc39a	4	65.939	468890000	15	23.1581	NaN	23.4302	NaN	NaN	22.6611	NaN	NaN	NaN	NaN	NaN	NaN	NaN	NaN	NaN	NaN	NaN	NaN	NaN	NaN	NaN	NaN	NaN	23.2371	NaN	NaN	NaN	NaN	NaN	NaN	NaN	NaN	NaN	NaN	NaN	NaN	NaN	NaN	NaN	NaN	NaN
1	NaN	D4A0H5;B5DEL2		Cpsf1	3	154.88	92805000	6	NaN	NaN	NaN	NaN	NaN	NaN	NaN	NaN	NaN	NaN	NaN	NaN	NaN	NaN	NaN	NaN	NaN	NaN	NaN	NaN	NaN	NaN	NaN	NaN	NaN	NaN	NaN	NaN	NaN	NaN	NaN	NaN	NaN	NaN	NaN	NaN	NaN	NaN	NaN	NaN	NaN
1	NaN	B5DEL7		LOC100363239	1	7.7412	1023000000	60	NaN	NaN	NaN	NaN	NaN	NaN	NaN	NaN	NaN	NaN	NaN	NaN	NaN	NaN	NaN	NaN	NaN	NaN	NaN	NaN	NaN	NaN	NaN	NaN	NaN	NaN	NaN	NaN	NaN	NaN	NaN	NaN	NaN	NaN	NaN	NaN	NaN	NaN	NaN	NaN	NaN
0.938234	0.013197	B5DEL8;A0A0G2JZJ9		LOC100361505	4	12.7	459820000	75	22.6881	22.5354	22.387	23.1641	23.3944	23.4143	23.4501	23.4145	23.1459	22.7783	22.8053	22.7876	22.3951	22.6355	NaN	NaN	NaN	NaN	22.4871	22.256	22.4045	22.9506	22.8641	22.9607	NaN	NaN	23.001	22.6047	NaN	22.8633	22.3434	22.3931	22.317	22.7891	22.9221	22.8051	22.22	NaN	NaN	23.0567	23.0366
0.545812	-0.0502602	P62083;B5DEL9;Q6AY74	40S ribosomal protein S7	Rps7	16	22.127	15816000000	373	27.765	27.7527	27.6898	27.5169	27.501	27.6246	28.0631	27.9355	27.8271	27.8124	27.7328	27.8445	27.8532	28.0266	27.946	27.4774	27.016	27.2458	27.5192	27.8138	27.7483	27.6857	27.6917	27.6939	27.8834	28.0028	27.9104	27.7941	27.8674	27.9987	28.0212	28.1412	28.1235	27.7919	27.749	27.7425	28.1353	28.2525	28.1119	27.9235	28.1038
0.788127	-0.051711	B5DEM3;G3V6N2;A0A0G2K8M5		Tmed4	3	26.145	426420000	60	22.8401	NaN	22.7818	23.4297	23.3802	23.449	22.7578	23.1078	22.5611	NaN	NaN	NaN	23.0618	NaN	NaN	23.4039	23.6457	23.4711	22.9925	23.2104	NaN	22.9811	23.1029	23.1064	NaN	NaN	NaN	23.4411	22.9996	23.239	23.0049	22.9135	23.4089	23.1343	22.6156	22.6259	22.9192	22.3433	23.0699	23.2436	23.0005
0.732304	0.0501883	F1LSW7;B5DEM5;Q63507;Q6TUH8	60S ribosomal protein L14	Rpl14	9	23.322	3679000000	293	25.2431	25.2268	25.175	25.8082	25.5589	25.4747	25.7262	25.7428	25.7324	24.458	24.373	24.3352	25.4213	25.441	25.4841	26.0797	26.0595	26.5158	25.6373	25.5696	25.564	25.216	25.3545	25.2582	25.8628	26.1369	26.2074	25.1254	25.2732	25.2012	25.6705	25.7085	25.6954	25.7622	25.8106	25.6729	26.3039	26.4282	26.299	26.134	26.1903
0.0498851	0.0726452	B5DEN4;P04642;H9N9H4;Q6AYX2;P19629	L-lactate dehydrogenase;L-lactate dehydrogenase A chain	Ldha	48	36.45	151520000000	2476	30.945	30.9871	30.971	31.2516	31.2205	31.1969	31.1363	31.1686	31.1076	31.1952	31.1755	31.2179	31.1009	31.0771	31.0846	29.9375	30.2702	30.3074	30.9096	31.0116	30.9593	30.9771	30.9679	30.9107	31.0461	31.096	31.1636	31.2216	31.1233	31.0928	30.9843	30.8828	30.8636	31.058	31.0201	31.0398	31.1571	31.2415	31.1874	31.1579	31.147
0.0369362	-0.128511	B5DEN5;Q7TPK5		Eef1b2	9	24.675	9142200000	297	26.8141	26.8107	26.8708	27.0894	27.0242	27.1134	26.743	26.9189	26.8602	27.0578	27.0638	27.1344	26.8985	26.861	27.0014	28.232	28.0638	27.9533	27.0904	27.2752	27.4012	26.5125	26.5212	26.4783	26.9904	26.9775	26.9941	26.9634	26.9372	26.8369	27.3309	27.043	27.0599	26.7789	26.667	26.8236	26.8096	26.7897	26.9954	27.1021	27.0622
0.655825	-0.0286473	B5DEP2		Rab25	7	23.444	564170000	48	22.8256	23.1706	23.04	22.8692	23.043	23.0083	22.8567	22.7018	22.9671	23.026	22.965	22.975	22.9885	22.8958	23.1176	NaN	NaN	NaN	22.8722	23.1695	23.1078	23.0295	23.1898	23.0676	22.9179	23.0481	23.0261	22.6599	22.7284	22.8141	23.2392	23.0921	23.227	22.9552	23.0493	23.0366	23.1454	NaN	23.1909	22.8727	22.8889
0.0784156	0.168146	B5DEP7;A0A0G2K3V8		LOC100911683	3	8.496	1022400000	73	NaN	24.4792	NaN	NaN	NaN	NaN	24.2733	24.2181	NaN	24.4422	24.3106	24.3024	24.5476	24.5627	24.3586	NaN	NaN	NaN	23.9525	24.0153	23.8949	24.0495	24.1817	24.2162	24.2426	24.3932	24.3286	21.821	23.721	23.6644	24.4963	24.4198	NaN	NaN	NaN	NaN	NaN	NaN	NaN	23.9088	NaN
0.0337424	0.498175	B5DEQ4		Snrpb2	5	25.352	207660000	38	NaN	21.7668	NaN	NaN	NaN	NaN	NaN	21.0204	21.8626	21.8735	22.6994	22.2109	NaN	22.0774	22.1472	NaN	NaN	NaN	NaN	NaN	NaN	NaN	22.2592	NaN	21.8164	21.8377	22.0299	NaN	NaN	NaN	NaN	NaN	NaN	NaN	NaN	22.011	NaN	NaN	NaN	NaN	22.2398
0.128654	0.191525	B5DER3;Q711G3	Isoamyl acetate-hydrolyzing esterase 1 homolog	Iah1	5	28.004	551160000	30	23.5204	22.7849	23.5916	22.7841	NaN	22.8457	NaN	22.9115	23.0191	22.6809	22.7749	23.0756	NaN	23.0956	22.9066	NaN	24.3561	NaN	23.2836	22.9953	NaN	23.0349	23.1677	NaN	23.5659	23.2561	23.3616	22.8603	23.173	NaN	NaN	NaN	NaN	22.6022	NaN	23.277	22.7445	NaN	22.7356	NaN	23.1465
0.595517	0.0700556	F1LT35;D3ZTH8;B5DES1;P62752;D3ZTX9;D3ZNM1;D4AAL7;D3ZFK7;A0A0G2JU90;D3ZSR8	60S ribosomal protein L23a	RGD1564606;LOC689899;Rpl23a;RGD1565170	9	17.734	4912700000	184	25.8474	25.8954	25.9771	25.7579	26.0112	26.0411	26.2746	26.427	26.4058	26.0876	26.1462	26.1157	26.1102	26.2653	26.4048	24.2611	25.998	24.3268	25.885	25.9329	26.0849	25.7643	25.7479	25.7794	26.6729	26.6638	26.4885	25.5359	25.4565	25.4615	26.2836	26.3646	26.1372	25.9348	25.94	25.9768	26.5643	26.7634	26.8429	26.3245	26.2629
0.754307	0.0152559	B5DEX4;F7EWC1;A0A0G2K9C0		Vasp	18	39.723	5439300000	500	26.3186	26.2514	26.3194	25.9476	25.9564	26.0904	26.168	26.1627	26.1601	26.3007	26.2494	26.2996	26.2819	26.3601	26.3662	27.0376	26.8103	26.7811	25.9602	25.9606	26.0761	26.2145	26.3318	26.2346	26.2189	26.2403	26.3414	26.0736	26.1125	26.3039	26.3913	26.3688	26.3274	26.1647	26.1807	26.1367	26.1065	26.159	26.2363	25.9977	26.1566
1	NaN	B5DEX7;G3V7I3		Atp13a1	3	131.46	98012000	5	NaN	NaN	NaN	NaN	NaN	NaN	NaN	NaN	NaN	NaN	NaN	NaN	NaN	NaN	NaN	NaN	NaN	NaN	NaN	NaN	NaN	NaN	NaN	NaN	NaN	NaN	NaN	NaN	NaN	NaN	NaN	NaN	NaN	NaN	NaN	NaN	NaN	NaN	NaN	NaN	NaN
0.12222	-0.218943	B5DEY8		Snx6	15	46.636	1135200000	101	23.6805	23.9593	23.9001	24.3176	24.4037	24.4915	23.7353	24.1021	23.7153	23.3148	23.7782	23.5069	23.5416	24.3607	24.2857	NaN	NaN	NaN	24.6681	24.585	24.7434	23.4443	23.8051	23.4996	23.8145	24.4481	24.4363	23.8327	23.8827	23.9905	23.7094	23.8087	24.7065	23.5186	23.7119	23.4669	23.712	23.4376	23.6729	23.9304	23.6589
0.087977	-0.108756	B5DEZ4;D3ZTL0		Tcerg1	7	121.75	455530000	25	22.9132	NaN	23.0026	NaN	NaN	NaN	NaN	22.9761	22.9239	22.9117	22.8213	23.0403	22.8885	22.7944	NaN	NaN	NaN	23.4561	23.0091	22.7706	23.2581	22.9758	22.7639	22.9871	22.8314	22.9433	22.9207	NaN	22.7107	NaN	NaN	22.9308	23.1217	22.7217	22.8827	22.8642	22.577	NaN	NaN	22.7687	NaN
1	NaN	B5DEZ6	Glucosamine-6-phosphate isomerase	Gnpda2	2	31.006	381620000	2	NaN	NaN	NaN	NaN	NaN	NaN	NaN	NaN	NaN	NaN	NaN	NaN	NaN	NaN	NaN	NaN	NaN	NaN	NaN	NaN	NaN	NaN	NaN	NaN	NaN	NaN	NaN	NaN	NaN	NaN	NaN	NaN	NaN	NaN	NaN	NaN	NaN	NaN	NaN	NaN	NaN
1	NaN	B5DF36		Plac8	1	12.327	412450000	2	NaN	NaN	NaN	NaN	NaN	NaN	NaN	NaN	NaN	NaN	NaN	NaN	NaN	NaN	NaN	NaN	NaN	NaN	NaN	NaN	NaN	NaN	NaN	NaN	NaN	NaN	NaN	NaN	NaN	NaN	NaN	NaN	NaN	NaN	NaN	NaN	NaN	NaN	NaN	NaN	NaN
0.514004	0.0524401	B5DF46;Q5RK25	Phosphomannomutase	Pmm2	18	27.708	8723000000	461	26.7453	26.6772	26.6517	26.9278	26.8278	26.9668	26.8703	26.8758	26.8138	26.5731	26.652	26.715	26.8169	27.0258	26.9423	28.1401	27.8631	27.6662	26.857	26.6594	26.704	26.8679	26.8202	26.7946	27.2625	27.0051	27.2298	26.7671	26.74	26.8937	26.6784	26.5529	26.6185	26.6188	26.8231	26.8351	26.8149	26.7758	26.7613	26.9221	26.9875
1	NaN	B5DF51	Membrane magnesium transporter 1	Mmgt1	1	14.677	141090000	29	NaN	NaN	NaN	NaN	NaN	NaN	NaN	NaN	NaN	NaN	NaN	NaN	NaN	NaN	NaN	NaN	NaN	NaN	NaN	NaN	NaN	NaN	NaN	NaN	NaN	NaN	NaN	NaN	NaN	NaN	NaN	NaN	NaN	NaN	NaN	NaN	NaN	NaN	NaN	NaN	NaN
1	NaN	B5DF55		Stam	1	59.591	38072000	18	NaN	NaN	NaN	NaN	NaN	NaN	NaN	NaN	NaN	NaN	NaN	NaN	NaN	NaN	NaN	NaN	NaN	NaN	NaN	NaN	NaN	NaN	NaN	NaN	NaN	NaN	NaN	NaN	NaN	NaN	NaN	NaN	NaN	NaN	NaN	NaN	NaN	NaN	NaN	NaN	NaN
1	NaN	B5DF60;Q566D5;A0A0G2JVA7;Q6VV72		Eif1ax	3	16.46	236890000	10	NaN	NaN	NaN	NaN	NaN	NaN	NaN	NaN	NaN	NaN	NaN	NaN	NaN	NaN	NaN	NaN	NaN	NaN	NaN	NaN	NaN	NaN	NaN	NaN	NaN	NaN	NaN	NaN	NaN	NaN	NaN	NaN	NaN	NaN	NaN	NaN	NaN	NaN	NaN	NaN	NaN
1	NaN	B5DF62	Non-specific serine/threonine protein kinase	Pak4	2	64.749	62217000	2	NaN	NaN	NaN	NaN	NaN	NaN	NaN	NaN	NaN	NaN	NaN	NaN	NaN	NaN	NaN	NaN	NaN	NaN	NaN	NaN	NaN	NaN	NaN	NaN	NaN	NaN	NaN	NaN	NaN	NaN	NaN	NaN	NaN	NaN	NaN	NaN	NaN	NaN	NaN	NaN	NaN
0.216175	-0.080874	B5DF65		Blvrb	12	22.094	4478500000	253	25.6807	25.9354	25.7744	25.8802	25.7504	25.6225	25.9357	26.0337	25.7607	25.3717	25.6936	25.7397	25.8454	25.8163	25.7494	27.3482	27.366	NaN	25.6884	26.0457	25.6175	25.3502	25.3649	25.2097	26.1112	26.0029	25.939	26.1565	25.8324	26.009	26.3478	25.9903	26.1618	25.7283	25.6962	25.6452	25.6321	25.6364	25.8255	25.8369	25.5156
0.691997	-0.0541412	B5DF86		Cog8	3	70.761	143100000	37	21.641	NaN	NaN	NaN	NaN	NaN	NaN	21.7892	NaN	21.8909	NaN	21.8329	NaN	NaN	NaN	NaN	NaN	NaN	21.9883	NaN	NaN	NaN	NaN	21.5384	NaN	NaN	21.9496	NaN	NaN	22.1511	21.9904	NaN	NaN	NaN	21.5714	NaN	NaN	NaN	NaN	NaN	NaN
0.241692	-0.0483467	B5DF91	ELAV-like protein	Elavl1	14	36.169	2683300000	245	25.2103	25.1006	25.1523	25.0912	25.1341	25.4601	25.1051	25.1202	25.1706	25.1758	25.3608	25.2917	25.0564	25.054	25.2426	24.9466	25.1482	25.3963	25.0317	25.1494	25.241	25.1886	25.2295	25.4635	25.1665	25.082	25.0426	24.9492	25.142	24.9628	24.9613	25.0321	25.0267	25.0572	25.1662	25.0706	25.2628	25.0974	25.1088	25.3317	25.3315
0.603527	0.040309	B5DFA0		Vil1	64	92.66	42758000000	1819	29.0457	29.0161	29.1115	29.3253	29.3592	29.3291	29.2949	29.2418	29.2316	29.3435	29.3041	29.2759	29.2268	29.1526	29.148	28.8288	28.9429	28.9594	29.3421	29.2107	29.2914	29.3437	29.3768	29.4048	29.2826	29.3302	29.2423	29.1455	29.1312	29.1843	29.5168	29.4825	29.5137	29.1585	29.1123	29.2162	29.2277	29.1602	29.1753	29.1875	29.1864
1	NaN	B5DFA2;P0C0R5	Phosphoinositide 3-kinase regulatory subunit 4	Pik3r4	3	152.44	41056000	7	NaN	NaN	NaN	NaN	NaN	NaN	NaN	NaN	NaN	NaN	NaN	NaN	NaN	NaN	NaN	NaN	NaN	NaN	NaN	NaN	NaN	NaN	NaN	NaN	NaN	NaN	NaN	NaN	NaN	NaN	NaN	NaN	NaN	NaN	NaN	NaN	NaN	NaN	NaN	NaN	NaN
0.000166116	-0.225365	B5DFB2;D4A250		Rbbp4;RGD1563620	6	47.655	2409200000	163	24.8073	24.8206	24.6586	25.3817	25.2626	25.1821	24.9285	24.9559	25.0082	25.0604	24.9682	24.9415	24.689	24.8709	24.8853	26.3743	26.2943	26.0837	25.3153	25.3446	25.3502	24.9019	24.8183	25.0131	24.8337	24.9183	24.8817	24.9589	24.9807	25.5149	25.2414	25.1229	25.2202	24.6137	24.799	24.8702	24.9879	24.8535	24.9737	25.0314	25.0298
1	NaN	B5DFB6;F1M049		Atxn2	2	100.07	14882000	7	NaN	NaN	NaN	NaN	NaN	NaN	NaN	NaN	NaN	NaN	NaN	NaN	NaN	NaN	NaN	NaN	21.8688	NaN	NaN	NaN	NaN	NaN	NaN	NaN	NaN	NaN	NaN	NaN	NaN	NaN	NaN	NaN	NaN	NaN	NaN	NaN	NaN	NaN	NaN	NaN	NaN
0.317747	0.0953977	B5DFC6	Glucosamine-6-phosphate isomerase	Gnpda1	8	32.579	1914500000	141	24.54	24.6834	24.564	25.3214	25.3662	25.1558	24.299	24.539	24.4884	24.4809	24.7115	24.5377	24.5774	24.8329	24.496	NaN	NaN	24.402	24.8193	24.3389	24.2709	24.5118	24.8493	24.5863	24.5306	24.815	24.6214	25.159	25.0951	24.9414	24.7459	24.361	24.595	24.604	24.5514	24.7087	24.3153	24.7053	24.7124	24.5909	24.8737
0.181378	-0.0887833	B5DFC8	Eukaryotic translation initiation factor 3 subunit C	Eif3c	29	105.43	4349800000	478	25.6507	25.5746	25.7255	26.2784	26.4377	26.2354	25.8172	25.8939	25.9546	25.9423	25.9829	25.986	25.9465	25.8394	25.8255	26.1726	27.0563	25.8392	25.7832	25.8134	26.1367	25.9724	25.9075	25.9898	26.058	25.7626	25.9908	25.6876	25.9134	25.7299	25.6168	25.648	25.5173	25.6689	25.697	25.5016	25.7631	25.8741	25.8629	26.052	26.1627
0.148967	-0.376946	B5DFC9;A0A0G2K3C8;W4VSR4	Nidogen-2	Nid2	11	152.97	463660000	37	22.4185	23.124	22.5092	23.3003	NaN	23.7533	NaN	22.3718	NaN	21.6525	22.4707	22.7646	22.7783	23.0779	NaN	24.0542	NaN	23.8411	NaN	NaN	22.9387	NaN	NaN	NaN	22.643	NaN	23.1241	23.3664	23.5104	23.4942	NaN	NaN	NaN	NaN	22.6457	21.9179	21.9293	NaN	NaN	22.7286	22.9146
0.405617	-0.0910038	F7F163;B5DFD1		Nudcd1	3	66.269	149600000	32	21.4592	NaN	NaN	NaN	NaN	NaN	NaN	NaN	NaN	NaN	NaN	NaN	21.4695	NaN	21.4521	NaN	NaN	NaN	NaN	NaN	NaN	NaN	NaN	NaN	21.4803	21.5302	NaN	NaN	21.5198	NaN	NaN	NaN	NaN	21.5177	NaN	NaN	NaN	NaN	NaN	NaN	21.7141
0.386845	0.142781	B5DFD8	SH3 domain-binding glutamic acid-rich-like protein	Sh3bgrl	11	12.8	9322300000	624	27.2653	27.2238	27.1119	27.0695	26.9805	27.0797	27.4166	27.3162	27.2376	26.7629	26.6498	26.8097	27.1106	27.1166	27.1484	NaN	NaN	NaN	26.2925	26.5302	26.3965	26.9785	26.7674	27.0091	27.0702	26.8748	26.7836	27.3299	27.4466	27.3737	26.1203	26.0982	26.0352	27.0958	27.0985	27.1902	26.6718	26.7468	26.6675	27.1135	27.2916
0.14255	-0.105176	B5DFG4;Q9QUK5	Heat shock protein beta-7	Hspb7	7	18.618	1992900000	304	24.6552	24.7386	24.6244	25.0994	25.3452	25.1329	25.008	24.6345	24.662	24.6772	24.6831	24.4676	24.7351	24.9025	24.7021	NaN	NaN	NaN	24.9267	24.7459	24.6867	24.3554	24.4299	24.3477	24.5587	24.765	24.6844	25.1411	25.1704	25.0601	24.8168	25.107	24.8287	24.8331	24.5979	24.9049	24.93	25.0409	24.8217	24.842	24.8275
0.234106	0.168703	B5DFI1;F1LND1		Cog1	8	108.57	432930000	25	NaN	NaN	NaN	NaN	23.4349	NaN	23.3272	23.1329	NaN	23.2991	23.2356	23.3758	23.3956	23.4853	23.7504	NaN	NaN	NaN	23.4059	NaN	NaN	NaN	23.2607	NaN	NaN	NaN	NaN	NaN	NaN	NaN	NaN	NaN	NaN	NaN	NaN	NaN	23.4262	NaN	NaN	23.4343	NaN
0.414144	-0.0670746	B5DFI3;A0A0G2JXX9;B2GV08		Ap1s1	7	18.733	946280000	153	23.9081	23.6372	23.5752	24.1451	24.3184	24.0609	23.3209	23.1788	23.6172	23.6061	23.6023	23.7733	23.6665	23.6077	23.4621	NaN	NaN	NaN	23.9585	23.8695	24.091	24.0896	23.8	23.7471	23.5146	23.751	23.6741	23.9985	24.471	24.0423	23.7303	24.0202	23.8855	23.7557	23.7221	23.6641	23.5678	23.6084	23.7126	23.8935	24.1495
1	NaN	B5DFI6;E9PU29		Rnf31	2	59.237	38002000	1	NaN	NaN	NaN	NaN	NaN	NaN	NaN	NaN	NaN	NaN	NaN	NaN	NaN	NaN	NaN	NaN	NaN	NaN	NaN	NaN	NaN	NaN	NaN	NaN	NaN	NaN	NaN	NaN	NaN	NaN	NaN	NaN	NaN	NaN	NaN	21.0942	NaN	NaN	NaN	NaN	NaN
0.280066	-0.176343	B5DFI9		Pdk3	9	47.943	693160000	108	NaN	23.0194	NaN	23.13	23.4282	23.3592	23.4682	24.4749	23.9203	24.0171	23.5761	23.9701	NaN	NaN	23.7199	NaN	NaN	NaN	23.6094	24.1858	23.4435	23.6066	23.9965	23.7143	23.5506	23.7237	23.3704	23.5885	23.4056	23.6321	23.7031	24.1896	NaN	NaN	23.573	NaN	NaN	23.4242	NaN	23.7115	23.7899
1	NaN	B5DFJ2		Fam3a	2	25.15	279450000	7	NaN	NaN	NaN	NaN	NaN	NaN	NaN	NaN	NaN	NaN	NaN	NaN	NaN	NaN	NaN	NaN	NaN	NaN	NaN	NaN	NaN	NaN	NaN	NaN	NaN	NaN	NaN	NaN	NaN	NaN	NaN	NaN	NaN	NaN	NaN	NaN	NaN	NaN	NaN	NaN	NaN
1	NaN	B5DFJ4		Vps18	2	110.18	48793000	1	NaN	NaN	NaN	NaN	NaN	NaN	NaN	NaN	NaN	NaN	NaN	NaN	NaN	NaN	NaN	NaN	NaN	NaN	NaN	NaN	NaN	NaN	NaN	NaN	NaN	NaN	NaN	NaN	NaN	NaN	NaN	NaN	NaN	NaN	NaN	NaN	NaN	NaN	NaN	NaN	NaN
1	NaN	B5DFK5;F1LML7;Q99PW9		Hip1r	2	119.42	114420000	35	NaN	NaN	NaN	NaN	NaN	NaN	NaN	NaN	NaN	NaN	NaN	NaN	NaN	NaN	NaN	NaN	NaN	NaN	NaN	NaN	NaN	NaN	NaN	NaN	NaN	NaN	NaN	NaN	NaN	NaN	NaN	NaN	NaN	NaN	NaN	NaN	NaN	NaN	NaN	NaN	23.7005
0.304947	-0.106775	B5DFK6;Q5RK16;Q4FZT4		Ap3d1	16	135.67	997800000	71	23.9731	23.5232	23.6213	24.2296	24.5599	24.5095	23.4443	23.806	23.8323	23.9476	23.8352	23.4638	23.8463	23.7767	23.7629	NaN	NaN	NaN	23.8986	24.3218	24.3497	24.2538	23.9498	24.1386	23.8412	23.3512	23.9803	NaN	23.8611	23.8249	24.2711	23.7839	NaN	23.3953	23.4225	23.7278	23.736	23.8884	24.3456	23.6685	23.9864
0.542584	-0.0533918	B5DFK8;A0A0G2K7V9;A0A0G2K8S0;F1M024		Pdxdc1	51	86.797	37179000000	1733	28.9689	28.9827	28.9973	28.9278	28.9119	28.965	29.0374	29.0804	29.1194	28.9583	28.9761	28.9802	29.0752	29.1726	29.1856	28.1229	28.1392	28.0317	29.5385	29.5359	29.4869	29.0287	29.0331	29.0165	29.1314	29.0568	29.0864	29.0577	28.9331	28.9404	29.2501	29.3188	29.2875	28.8663	28.8698	28.839	28.9352	29.0202	29.0213	29.1153	29.1719
1	NaN	B5DFL9		Sestd1	2	79.421	83975000	13	NaN	NaN	NaN	NaN	NaN	21.9517	NaN	NaN	NaN	NaN	NaN	NaN	NaN	NaN	NaN	NaN	NaN	NaN	NaN	NaN	NaN	NaN	NaN	NaN	NaN	NaN	NaN	NaN	22.094	NaN	NaN	NaN	NaN	NaN	NaN	NaN	NaN	NaN	NaN	22.3184	22.2622
1	NaN	B5DFM8		Bcas2	3	26.101	415660000	14	NaN	NaN	NaN	NaN	NaN	NaN	NaN	NaN	NaN	NaN	22.7249	NaN	NaN	NaN	NaN	NaN	NaN	NaN	NaN	NaN	NaN	NaN	NaN	NaN	NaN	NaN	NaN	NaN	NaN	NaN	NaN	NaN	NaN	NaN	NaN	NaN	NaN	NaN	NaN	NaN	NaN
0.878795	-0.0134797	B5DFN4		Pfdn5	8	17.326	1482300000	81	NaN	24.3494	24.5927	24.58	24.774	24.4585	24.4165	24.4307	24.2421	24.4707	24.226	24.3199	24.4493	24.1678	24.2688	NaN	NaN	NaN	24.4002	24.0476	23.9774	24.4587	24.192	24.1501	24.4189	24.361	24.5502	24.7361	24.4478	24.8728	24.5851	24.3698	24.2399	24.2268	24.2159	24.3206	24.1686	23.91	24.2741	24.2445	24.6204
0.00444095	0.0877566	Q6AYI1;B6DTP5;O88757		Ddx5	37	69.238	13347000000	927	27.4363	27.4431	27.4463	27.849	27.8061	27.8729	27.3973	27.4428	27.4796	27.6741	27.6759	27.7257	27.5776	27.4903	27.6145	26.8769	26.9248	27.2484	27.3962	27.519	27.4832	27.4867	27.514	27.5769	27.6374	27.615	27.6964	27.4134	27.465	27.401	27.3933	27.3591	27.4243	27.4651	27.459	27.501	27.4788	27.5203	27.563	27.606	27.6832
1	NaN	Q4FZZ3;B6DYP7;P04903;P00502;F7F2H5;Q63232;Q6TUG1;Q6AXY0;D3ZD94	Glutathione S-transferase;Glutathione S-transferase alpha-2;Glutathione S-transferase alpha-1;Glutathione S-transferase alpha-1, N-terminally processed	Gsta5;Gsta2;Gsta1	1	25.569	62414000	1	NaN	NaN	NaN	NaN	NaN	NaN	NaN	NaN	NaN	NaN	NaN	NaN	NaN	NaN	NaN	NaN	NaN	NaN	NaN	NaN	NaN	NaN	NaN	NaN	NaN	NaN	NaN	NaN	NaN	NaN	NaN	NaN	NaN	NaN	NaN	NaN	NaN	NaN	NaN	NaN	NaN
0.181898	0.0949427	B6DYP8;P04904;Q9JLX3;A0A0G2JVT2;A0A0G2JTB1;P46418;A0A0G2K8Q5;Q498T5;Q9JLQ6;Q7M0F7	Glutathione S-transferase;Glutathione S-transferase alpha-3;Glutathione S-transferase alpha-5	Gsta1;Gsta3;Gsta5	10	25.319	2468400000	223	25.331	24.9167	25.1253	24.3299	24.057	24.217	25.3157	25.0408	25.1877	24.717	25.0651	25.0263	25.0882	25.1073	25.0646	24.6839	25.217	24.6828	24.953	24.9216	25.0056	25.0843	24.8381	24.7662	25.058	25.2209	24.9647	25.0323	24.9266	25.2083	25.0514	24.8115	24.925	24.9875	25.1264	24.9416	25.3132	25.4781	25.3772	25.081	25.0737
0.623963	0.0476819	B6DYQ0;P24473	Glutathione S-transferase kappa 1	Gstk1	8	25.493	1618100000	207	24.2126	24.5688	24.3987	24.5955	24.4383	24.5459	24.2782	24.6788	24.4057	24.7375	24.6308	24.6917	24.3085	24.4385	24.3742	NaN	NaN	NaN	24.7442	24.6479	24.6521	24.8202	24.8277	24.5753	24.3972	24.3151	24.5218	24.1323	24.4727	24.3384	24.5328	24.5526	24.8191	24.397	24.5161	24.4054	24.7573	24.7311	24.7178	24.925	24.6991
0.802307	-0.00942764	B6DYQ2;P08010	Glutathione S-transferase Mu 2	Gstm2	26	25.702	29011000000	787	28.5276	28.5431	28.6473	28.816	28.8122	28.7973	28.6709	28.6291	28.6031	28.5491	28.5442	28.6282	28.6163	28.6261	28.6081	27.921	27.5554	28.0447	28.6327	28.6619	28.588	28.538	28.5262	28.535	28.7097	28.7486	28.7373	28.6147	28.7449	28.7156	28.5512	28.5497	28.5906	28.6054	28.5648	28.5729	28.6995	28.718	28.7366	28.6525	28.6688
0.428901	-0.123963	B6DYQ4;P08011	Microsomal glutathione S-transferase 1	Mgst1	3	17.471	225620000	19	22.2482	22.3515	22.2467	NaN	NaN	NaN	NaN	22.3239	NaN	NaN	NaN	NaN	NaN	NaN	21.7877	NaN	NaN	NaN	NaN	22.2437	NaN	22.6316	22.6894	22.771	NaN	NaN	NaN	NaN	23.165	22.3343	NaN	NaN	NaN	22.0443	22.0887	22.0323	NaN	NaN	22.2546	22.8965	22.3083
0.991424	0.000459417	B6DYQ5;Q9Z339;Q6AXR6;A0A096MJ04;A0A0G2JTY5;A0A096MJC4;B6DYQ6;Q6AXV9	Glutathione S-transferase omega-1	Gsto1	15	27.669	15245000000	547	27.6231	27.6332	27.5846	27.9249	27.8811	27.9415	27.7693	27.7125	27.7558	27.8191	27.7796	27.7521	27.5988	27.6366	27.6082	27.5156	27.5609	26.8341	27.8063	27.8708	27.7636	27.584	27.732	27.7918	27.8691	27.8395	27.6888	27.6292	27.6594	27.6173	27.7038	27.5748	27.7425	27.6143	27.6321	27.6557	27.7098	27.6917	27.6744	27.8765	27.8415
0.436908	0.0453907	B6DYQ7;P04906;D4A8S2;A0A0G2K4Q5	Glutathione S-transferase P	Gstp1	17	23.439	44241000000	1088	29.1276	29.3001	29.2493	29.2769	29.2184	29.2096	29.3529	29.3368	29.4004	29.3215	29.4147	29.3505	29.1717	29.1003	29.1848	29.8	29.9417	30.065	29.2664	29.3833	29.3957	29.1892	29.1531	29.2066	29.3077	29.385	29.3378	29.3614	29.2375	29.2346	29.0003	28.9809	28.8871	28.9711	29.0371	29.0252	29.1983	29.3747	29.3011	29.3177	29.4188
1	NaN	B6DYQ8;Q01579	Glutathione S-transferase theta-1	Gstt1	2	27.468	113240000	5	NaN	NaN	NaN	NaN	NaN	NaN	NaN	NaN	NaN	NaN	NaN	NaN	NaN	NaN	NaN	NaN	NaN	NaN	NaN	NaN	NaN	NaN	NaN	NaN	NaN	NaN	NaN	NaN	NaN	NaN	NaN	NaN	NaN	NaN	NaN	NaN	NaN	NaN	NaN	NaN	NaN
0.0994732	-0.0935706	B6DYQ9;P30713;A0A0G2K3C6;A0A0G2JZV9	Glutathione S-transferase theta-2	Gstt2	15	27.439	5990000000	346	26.2106	26.1845	26.1194	26.5652	26.6776	26.5852	26.3809	26.5617	26.4538	26.2464	26.3526	26.2409	26.2916	26.1588	26.2808	26.8726	26.8193	26.4243	26.4632	26.5812	26.5053	26.0821	26.1534	26.0309	26.4648	26.6661	26.5162	26.5299	26.4054	26.4792	26.4447	26.3434	26.3601	26.2171	26.0486	25.9961	26.3322	26.4012	26.3647	26.1243	26.3428
1	NaN	D4A1U5;F1LNE1;Q66HT2;B7SBD2;Q99PM1	TOX high mobility group box family member 3;TOX high mobility group box family member 4	Tox;Tox3;Tox4	1	57.285	43519000	10	NaN	NaN	NaN	NaN	NaN	NaN	NaN	NaN	NaN	NaN	NaN	NaN	NaN	NaN	NaN	NaN	NaN	NaN	NaN	NaN	NaN	NaN	NaN	NaN	NaN	NaN	NaN	NaN	NaN	NaN	NaN	NaN	NaN	NaN	NaN	NaN	NaN	NaN	NaN	NaN	NaN
0.76323	-0.0363485	Q0H8B9;B8PS70;A0A0G2JVV1	C-type lectin domain family 2 member D11	Clec2d11;Clec2g	5	23.537	386930000	96	22.2687	22.6743	22.0443	22.894	22.8634	23.065	22.4784	22.4631	22.3501	22.26	22.6486	22.892	22.6083	22.591	22.56	NaN	NaN	NaN	22.4363	NaN	22.5012	22.7499	22.6419	22.4814	22.0909	22.1384	NaN	22.2173	22.9086	22.5336	21.7889	22.227	NaN	22.3082	22.5003	21.9951	NaN	22.7527	22.5246	22.4125	NaN
[truncated: 2,720 more rows]
[truncated: 19 more columns]

## Sheet: DiseaseModel
pvalue	log2ratio	Protein IDs	Protein names	Gene names	Razor + unique peptides	Mol. weight [kDa]	Intensity	MS/MS count	LFQ intensity 1B_01	LFQ intensity 1B_02	LFQ intensity 1B_03	LFQ intensity 1N_01	LFQ intensity 1N_02	LFQ intensity 1N_03	LFQ intensity 1R_01	LFQ intensity 1R_02	LFQ intensity 1R_03	LFQ intensity 1V_01	LFQ intensity 1V_02	LFQ intensity 1V_03	LFQ intensity 2B_01	LFQ intensity 2B_02	LFQ intensity 2B_03	LFQ intensity 2N_01	LFQ intensity 2N_02	LFQ intensity 2N_03	LFQ intensity 2R_01	LFQ intensity 2R_02	LFQ intensity 2R_03	LFQ intensity 2V_01	LFQ intensity 2V_02	LFQ intensity 2V_03	LFQ intensity 3B_01	LFQ intensity 3B_02	LFQ intensity 3B_03	LFQ intensity 3N_01	LFQ intensity 3N_02	LFQ intensity 3N_03	LFQ intensity 3R_01	LFQ intensity 3R_02	LFQ intensity 3R_03	LFQ intensity 3V_01	LFQ intensity 3V_02	LFQ intensity 3V_03	LFQ intensity 4B_01	LFQ intensity 4B_02	LFQ intensity 4B_03	LFQ intensity 4N_01	LFQ intensity 4N_02
[truncated: 3,880 more rows]
[truncated: 19 more columns]

[truncated: 1 more sheets: Foglio1]
