# Supplementary material for: Microbiome and gut as partners in the persistence of post-inflammatory visceral pain: insight into working mechanisms of faecal transplant for therapy advance
Source: Research Square preprint supplement (doi:10.21203/rs.3.rs-6025304/v1), 2025-10-20
Supplement: Supplementary file 3 [file 391ce04e1fee939b3f1642a3.xlsx]

## Sheet: mmolkg-1 sorted
	Concentrations (mmol.kg-1 )				Mon Nov 29 08:34:28 GMT 2021
	italic: tentative assignment (caproate, caprylate, acetoin-like unknown, pyruvate hydrate, phloretate, cis-aconitate)				20211111-__flat_ex11_p1.cnx	20211111-__flat_ex20_p1.cnx	20211111-__flat_ex30_p1.cnx	20211111-__flat_ex40_p1.cnx	20211111-__flat_ex50_p1.cnx	20211111-__flat_ex60_p1.cnx	20211111-__flat_ex70_p1.cnx	20211111-__flat_ex80_p1.cnx	20211111-__flat_ex90_p1.cnx	20211111-__flat_ex100_p1.cnx	20211111-__flat_ex110_p1.cnx	20211111-__flat_ex120_p1.cnx	20211111-__flat_ex132_p1.cnx	20211111-__flat_ex142_p1.cnx	20211111-__flat_ex150_p1.cnx	20211111-__flat_ex160_p1.cnx	20211111-__flat_ex170_p1.cnx	20211111-__flat_ex180_p1.cnx	20211111-__flat_ex191_p1.cnx	20211111-__flat_ex202_p1.cnx	20211111-__flat_ex211_p1.cnx	20211111-__flat_ex220_p1.cnx	20211111-__flat_ex232_p1.cnx	20211111-__flat_ex241_p1.cnx	20211111-__flat_ex250_p1.cnx	20211111-__flat_ex261_p1.cnx	20211111-__flat_ex270_p1.cnx	20211111-__flat_ex280_p1.cnx	20211111-__flat_ex290_p1.cnx	20211111-__flat_ex302_p1.cnx	20211111-__flat_ex310_p1.cnx
	20211111-__flat				11	20	30	40	50	60	70	80	90	100	110	120	130	140	150	160	170	180	190	200	210	220	230	240	250	260	270	280	290	300	310
	Animals' identification number				1B	2B	3B	4B	5B	9B	10B	1R	2R	3R	4R	5R	9R	10R	11R	1N	2N	3N	4N	5N	6N	7N	8N	1V	2V	3V	4V	5V	6V	7V	8V
	Treatment				DNBS + FMTCTR	DNBS + FMTCTR	DNBS + FMTCTR	DNBS + FMTCTR	DNBS + FMTCTR	DNBS + FMTCTR	DNBS + FMTCTR	DNBS + FMTDNBS	DNBS + FMTDNBS	DNBS + FMTDNBS	DNBS + FMTDNBS	DNBS + FMTDNBS	DNBS + FMTDNBS	DNBS + FMTDNBS	DNBS + FMTDNBS	abx + FMTCTR	abx + FMTCTR	abx + FMTCTR	abx + FMTCTR	abx + FMTCTR	abx + FMTCTR	abx + FMTCTR	abx + FMTCTR	abx + FMTDNBS	abx + FMTDNBS	abx + FMTDNBS	abx + FMTDNBS	abx + FMTDNBS	abx + FMTDNBS	abx + FMTDNBS	abx + FMTDNBS
	Metabolite	average	min	max	Therapeutic	Therapeutic	Therapeutic	Therapeutic	Therapeutic	Therapeutic	Therapeutic	Therapeutic	Therapeutic	Therapeutic	Therapeutic	Therapeutic	Therapeutic	Therapeutic	Therapeutic	patho	patho	patho	patho	patho	patho	patho	patho	patho	patho	patho	patho	patho	patho	patho	patho
1	Butyrate	9.44228	1.2675	20.1864	6.1854	8.5098	5.4327	16.0771	9.3587	8.3174	6.3713	19.9199	9.4302	16.2045	9.1325	10.3597	17.2198	17.7398	19.1555	5.5367	5.6043	20.1864	10.1881	1.2675	4.0248	6.0931	4.0326	13.312	7.9508	7.7467	6.3128	5.785	3.8129	4.0196	7.423
2	Acetate	34.1802	19.344	52.7579	26.312	32.201	30.0547	51.8232	43.9348	37.05	30.9608	44.3339	47.0808	41.8145	41.2321	36.3103	52.7579	47.8231	51.2642	33.6713	26.2236	33.02	21.6554	33.0096	25.428	31.0557	21.879	29.3046	20.4412	31.7213	28.6533	37.0955	19.344	20.4893	31.642
3	Propionate	5.42565	2.7781	13.0533	4.5253	4.615	5.3859	5.0323	4.29	4.9491	5.8058	6.9238	5.6771	4.6046	6.6807	5.2169	7.0096	4.6748	6.7444	5.8383	3.4671	7.176	2.7781	7.7623	3.9845	3.8792	4.2393	6.7678	4.03	4.8438	4.9127	13.0533	3.6647	4.6748	4.9881
4	Valerate	0.58219	0.0884	1.157	0.4901	0.3809	0.4121	0.7319	0.4004	0.5291	0.4797	1.157	0.6058	1.0465	0.5291	0.4758	0.9386	0.4953	1.0595	0.4342	0.3432	1.157	0.6474	0.0884	0.4316	0.5421	0.4654	1.1466	0.65	0.6188	0.3523	0.2431	0.1222	0.4277	0.6461
5	Isobutyrate	0.435123	0.1638	1.313	0.3627	0.4966	0.3341	0.3029	0.2743	0.3952	0.2886	0.4043	0.481	0.2548	0.4511	0.3419	0.2834	0.2262	0.4511	0.3354	0.1885	0.5148	0.4173	0.4511	0.403	0.1638	1.2402	1.1687	0.3614	1.313	0.3198	0.3757	0.2613	0.2639	0.3627
6	Isovalerate	0.308058	0.0507	1.2207	0.3848	0.2587	0.3237	0.2275	0.1742	0.2769	0.3926	0.4121	0.2184	0.1963	0.3185	0.3029	0.3822	0.156	0.3198	0.3419	0.1625	0.6383	0.4862	0.0507	0.273	0.1937	0.2483	1.2207	0.3445	0.208	0.1417	0.0819	0.2067	0.3172	0.2899
7	2-Hydroxyisovalerate	0.00834516	0	0.0663	0.0169	0	0	0	0	0.0221	0.0182	0	0	0	0	0	0	0	0	0	0.0273	0	0	0.0312	0.0091	0.0195	0	0	0	0	0	0.0663	0.0247	0	0.0234
8	Caproate	0.326635	0	1.3143	0.6812	0.1586	0.3744	0.2067	0.2639	0.3705	0.1157	0.2808	0.1885	0.533	0.4056	0.2171	0.7696	0.4043	1.1674	0.6019	0.2054	0.1417	0.3133	0	0.3549	0.1456	0.2275	1.3143	0.1131	0.0962	0.1443	0.0598	0.0897	0.1261	0.0546
9	Caprylate	0.164765	0.0351	0.3354	0.1157	0.1261	0.1911	0.1391	0.1014	0.2171	0.1781	0.3237	0.2197	0.3354	0.2197	0.1066	0.1261	0.143	0.2249	0.1833	0.1768	0.234	0.182	0.0351	0.13	0.1768	0.1911	0.2951	0.2158	0.0858	0.1144	0.0507	0.0624	0.1274	0.0793
10	2- methylbutyrate	0.170761	0.026	0.5967	0.1326	0.2041	0.1157	0.0806	0.0533	0.1118	0.0832	0.2366	0.1274	0.1989	0.1144	0.0897	0.1547	0.0988	0.2132	0.1521	0.1365	0.3822	0.2756	0.026	0.1677	0.1235	0.2028	0.5967	0.2977	0.1352	0.1131	0.1482	0.1625	0.1742	0.1846
11	5-Aminovalerate	0.152603	0.0338	0.5863	0.1209	0.3445	0.0533	0.0611	0.0793	0.0923	0.1417	0.1586	0.1105	0.1157	0.0637	0.0455	0.0793	0.0598	0.1859	0.0338	0.0728	0.0845	0.1976	0.481	0.1183	0.0455	0.1495	0.2379	0.1092	0.0728	0.0741	0.5863	0.4953	0.0975	0.1625
12	unknown, Acetoin -like (structure CH3CH-CO-X)	0.118971	0.0065	0.4966	0.0624	0.0195	0.0468	0.0247	0.0416	0.0546	0.0533	0.0611	0.0429	0.0208	0.0416	0.0299	0.1287	0.0234	0.0871	0.0624	0.052	0.3757	0.0702	0.0338	0.0728	0.0429	0.3796	0.1521	0.4966	0.3913	0.2392	0.2379	0.0065	0.2535	0.0832
13	Lactate	0.801429	0.247	2.5376	2.3036	0.5577	0.6487	0.9425	0.6708	0.8918	1.6913	0.2522	0.3341	0.4043	1.1869	0.6877	0.5356	0.7891	0.3809	1.9032	2.5376	0.5655	0.5564	0.5421	0.7059	2.1112	0.3783	0.4732	0.4797	0.5447	0.2756	0.247	0.3835	0.5278	0.3354
14	3-Hydroxybutyrate	0.0987161	0	0.7566	0.0234	0	0.0286	0	0.0156	0	0.0195	0.0715	0.6955	0.1443	0.1716	0.0923	0.7566	0.0143	0.0598	0	0	0.0494	0.0676	0	0	0	0.0325	0.3016	0.1352	0.0858	0.0689	0.0442	0.078	0.0533	0.0507
15	Acetoacetate	0.143587	0	0.9074	0.1079	0.0975	0.1443	0.1144	0.1313	0.0754	0.0663	0.338	0.7124	0.1404	0.2483	0.1651	0.9074	0.0637	0.0728	0.0728	0.0403	0.0754	0.1625	0.0247	0.0598	0.0442	0.1157	0.0923	0	0.0858	0.0429	0.026	0.0273	0.0702	0.1261
16	Formate	0.118929	0.0507	0.2717	0.1209	0.0507	0.0754	0.052	0.0572	0.0689	0.1105	0.1131	0.1131	0.0533	0.0611	0.065	0.2158	0.1781	0.0975	0.0871	0.091	0.1196	0.2223	0.1131	0.2015	0.1768	0.2717	0.2314	0.0806	0.1365	0.0793	0.052	0.0962	0.1898	0.1053
17	Ethanol	0.299	0.0975	0.6448	0.2509	0.2678	0.3133	0.3731	0.4355	0.3952	0.6448	0.1612	0.2301	0.2418	0.4277	0.2964	0.195	0.2392	0.0975	0.4238	0.4459	0.1105	0.1651	0.3614	0.1547	0.4654	0.182	0.1599	0.2327	0.3133	0.2678	0.6227	0.3679	0.312	0.1144
18	Methanol	0.40451	0.1612	0.7072	0.7072	0.3172	0.5213	0.5356	0.4615	0.4407	0.5005	0.1794	0.1612	0.468	0.6123	0.4342	0.325	0.5616	0.2353	0.429	0.3809	0.2535	0.2405	0.4576	0.3146	0.5447	0.3705	0.2249	0.5603	0.3523	0.3848	0.4693	0.3497	0.3614	0.3848
19	2,3-Butanediol	0.0665097	0	0.2665	0.2054	0.0247	0.1222	0.0351	0.1014	0.0663	0.0741	0.0676	0.2665	0.0364	0.0754	0.0676	0.0819	0.0364	0.0208	0.0949	0.0481	0.0338	0.0494	0.0429	0	0.104	0.0702	0.091	0.0442	0.0273	0.0351	0.0078	0.0221	0.0702	0.039
20	Propylene glycol	0.0194581	0	0.052	0.0403	0.0325	0.0507	0.0169	0.0104	0.0117	0.0247	0.0195	0.052	0.0195	0.026	0	0.0416	0.0091	0.0091	0.0299	0.013	0	0	0.0117	0.026	0.0273	0.0273	0	0.0182	0.013	0.013	0.0078	0.0026	0.0273	0.0221
21	Phenylacetate	0.197097	0.0689	0.3926	0.2106	0.1105	0.1482	0.0689	0.0884	0.182	0.2431	0.2002	0.1612	0.1365	0.156	0.0884	0.1131	0.1157	0.1235	0.2392	0.1651	0.2964	0.2717	0.3536	0.1586	0.273	0.3107	0.3302	0.2067	0.2275	0.156	0.3926	0.1534	0.1417	0.2873
22	4-Hydroxyphenylacetate	0.223642	0.0416	0.6058	0.5434	0.2158	0.2041	0.0806	0.0416	0.3042	0.221	0.1079	0.0858	0.0806	0.1976	0.0884	0.0468	0.0637	0.0429	0.2782	0.3484	0.2496	0.4186	0.1092	0.3861	0.2093	0.6058	0.4485	0.4745	0.2171	0.0949	0.1144	0.0923	0.3939	0.1677
23	3-(3-Hydroxyphenyl)-3-hydroxypropanoate	0.0953613	0	0.6045	0.0455	0.0273	0.0156	0.0247	0.0221	0.0377	0.0702	0.0091	0.0221	0	0.0403	0.0195	0.0221	0.0182	0.0234	0.4433	0.4004	0.0286	0.039	0.1937	0.0338	0.0273	0.3315	0.0767	0.0338	0.0065	0.0247	0.6045	0.2691	0.0182	0.0273
24	3-Hydroxyphenylacetate	0.105677	0	0.2912	0.2197	0.1456	0.0767	0.0546	0.0741	0.1144	0.2457	0.0494	0.0624	0.0728	0.1989	0.0286	0.0507	0.0429	0.0754	0.2522	0.2249	0.0936	0.0858	0.0364	0.0741	0.1066	0.2912	0.052	0.1339	0.0611	0.0689	0	0.1898	0.0377	0.0559
25	3-Phenylpropionate	0.313635	0.1235	0.5005	0.3341	0.1911	0.1365	0.364	0.2392	0.4654	0.208	0.5005	0.3536	0.3562	0.2886	0.26	0.4355	0.3055	0.4251	0.234	0.2444	0.3458	0.3055	0.1417	0.2548	0.4199	0.4251	0.455	0.2171	0.4277	0.3185	0.1235	0.2184	0.3861	0.3419
26	Phloretate	0.0531742	0	0.4719	0.2158	0	0	0	0	0	0	0	0	0	0	0	0	0	0	0	0	0.4719	0	0	0	0	0	0	0.221	0.2379	0.2392	0.104	0	0.1586	0
27	Urocanate	0.0679774	0	0.1404	0.0819	0.078	0.0364	0.0559	0.0741	0.0598	0.0871	0.0832	0.1053	0.117	0.0806	0.0845	0.0494	0.0806	0.0559	0.0377	0.0689	0.0793	0.0455	0.1261	0.0169	0.1404	0.0533	0.0299	0.0793	0.0533	0.039	0.1326	0	0.0182	0.0572
28	Methylamine	0.1144	0.013	0.3276	0.0455	0.0793	0.0442	0.13	0.0793	0.0728	0.1352	0.143	0.2587	0.0858	0.1183	0.2405	0.1378	0.1391	0.0858	0.0663	0.1508	0.0923	0.065	0.3276	0.0481	0.0858	0.2353	0.2236	0.1053	0.0832	0.0481	0.013	0.0273	0.0741	0.1053
29	Dimethylamine	0.0160194	0.0039	0.0754	0.0117	0.0208	0.0156	0.0169	0.0156	0.0286	0.0065	0.0208	0.0182	0.0091	0.0052	0.0754	0.0195	0.0039	0.0156	0.0195	0.0182	0.0143	0.0104	0.0156	0.0078	0.0156	0.0117	0.0169	0.0104	0.0052	0.0117	0.0234	0.0091	0.0104	0.013
30	Putrescine	0.0585	0	0.13	0.0234	0.0624	0.0221	0.0234	0.0338	0.0572	0.0988	0.0299	0.0234	0.078	0.0585	0.0858	0.0598	0.0208	0.0637	0.0572	0.0442	0.0442	0.065	0.0767	0.1118	0.0416	0.104	0.0546	0.0754	0.0689	0.0884	0	0.13	0.0572	0.0533
31	Tyramine	0.0615613	0	0.4485	0.0195	0	0	0	0.0403	0	0.091	0	0	0	0	0	0	0	0	0.0104	0.0429	0	0	0	0	0	0.4485	0	0.3003	0.3042	0.1079	0.2925	0	0.2509	0
32	Glucose	6.37029	2.0293	12.727	6.2829	4.9452	4.498	6.4285	6.3141	8.0691	7.4594	10.8446	5.2091	9.3873	8.8608	7.7545	12.727	9.4146	11.2879	3.0927	2.8236	3.9689	2.1827	6.6001	2.2399	5.0375	5.1415	2.0293	5.642	6.7353	9.0103	8.177	5.6537	4.199	5.4626
33	Galactose	0.621735	0.2964	1.1375	0.6032	0.3055	0.6474	0.39	0.3783	0.4771	0.4212	0.5811	0.5408	0.3809	0.6214	0.455	0.9087	0.7371	0.5889	0.4732	0.3952	0.4459	0.9685	0.8294	0.7059	1.1375	1.1323	0.7605	0.494	0.5993	0.6318	0.8697	0.8034	0.6942	0.2964
34	Fucose	0.277906	0.1625	0.5343	0.1638	0.221	0.2431	0.2067	0.234	0.2873	0.2145	0.1742	0.2184	0.2873	0.2834	0.3588	0.2535	0.2743	0.2106	0.2808	0.2158	0.2912	0.3679	0.2457	0.3419	0.5343	0.3159	0.4589	0.3367	0.2938	0.234	0.3094	0.3211	0.2743	0.1625
35	Xylose	2.86017	0.7475	4.7528	3.8714	4.4499	3.1902	2.9913	3.185	4.4941	3.7271	2.4375	4.7528	3.6413	4.5591	3.705	3.7492	4.2276	2.08	1.2337	1.7966	1.404	1.3559	3.5672	0.9438	4.0118	3.4242	0.7475	2.5376	2.639	1.924	2.8639	0.975	2.6364	1.5431
36	Ribose	2.61409	0.1612	9.3678	1.0855	0.546	0.6214	0.1612	0.7579	2.0319	0.923	4.6644	0.9711	1.3338	0.8645	0.6981	3.9819	2.2438	2.5415	2.1775	1.6731	3.4372	7.6778	3.3137	3.8766	2.4765	3.9013	9.3678	1.7329	2.8054	2.6702	2.2113	2.5181	3.6439	4.1275
37	Arabinose	0.596826	0.104	1.2025	0.6591	1.1843	0.4849	0.7124	0.9802	0.9529	0.7982	0.6136	0.4654	0.7761	1.1258	1.0985	0.7826	0.8593	0.5057	0.3185	0.416	0.2028	0.104	0.6136	0.1469	0.6474	0.3458	0.1729	0.3614	0.5421	0.5564	1.2025	0.3679	0.2483	0.2561
38	Glucose-1-phosphate	0.0888613	0	0.7137	0	0.3354	0.1196	0.4771	0.1547	0	0.1092	0	0.1014	0.7137	0.1417	0.4758	0	0	0	0	0	0.1261	0	0	0	0	0	0	0	0	0	0	0	0	0
39	N-Acetylglucosamine	0.391426	0	0.8671	0.2158	0.2405	0.3627	0.2184	0.2288	0.4017	0.2678	0.3978	0.2587	0.3887	0.2795	0.3172	0.6188	0.5018	0.2886	0.6708	0.3315	0.4264	0.5746	0	0.832	0.5603	0.8671	0.728	0.2912	0.3302	0.3978	0.0728	0.1443	0.7826	0.1378
40	Sucrose	0.0437387	0	0.26	0.1274	0	0.0793	0.1144	0.0806	0.0403	0.0936	0.1014	0	0.078	0.0299	0	0	0	0.26	0.0169	0	0.0546	0	0	0	0	0	0	0.0442	0	0.0247	0.1209	0	0	0.0897
41	Galacturonate	0.654403	0.104	1.5782	0.4771	0.195	0.4186	0.3042	0.4407	0.5707	0.195	0.728	0.3315	0.2509	0.2977	0.104	0.7371	0.8398	0.4914	0.507	0.5668	0.7358	1.131	1.5782	1.0998	0.7943	0.7306	1.3312	1.1011	0.5967	0.598	0.8879	0.3211	1.1635	0.7618
42	Alanine	0.384087	0.1287	0.7891	0.4641	0.4446	0.3588	0.5811	0.3263	0.3549	0.481	0.3562	0.3198	0.4667	0.3588	0.507	0.1287	0.2392	0.3042	0.4147	0.6747	0.2834	0.1976	0.4966	0.2496	0.468	0.3107	0.3692	0.3406	0.2691	0.2834	0.6682	0.7891	0.1742	0.2262
43	Asparagine	0.367984	0	0.949	0.2977	0.4251	0.4927	0.4043	0.2158	0.1703	0.2613	0.4147	0.1443	0.6136	0.5356	0.4251	0.208	0.6435	0.2782	0.5421	0.715	0.5876	0.2548	0	0.1677	0.949	0.169	0.2171	0.5421	0.5525	0.4381	0.1547	0.1105	0.2951	0.182
44	Aspartate	0.350916	0.1235	0.6526	0.6526	0.26	0.4446	0.1729	0.2639	0.3549	0.3549	0.195	0.5109	0.1807	0.3107	0.2483	0.1378	0.1235	0.3575	0.4017	0.4784	0.1846	0.2119	0.364	0.5447	0.6266	0.3861	0.3211	0.4238	0.4355	0.3276	0.4017	0.637	0.2587	0.3068
45	β-Alanine	0.124716	0	1.2051	0.0663	0	0	0	0	0.1066	0.0325	0.0715	0.0663	0.0364	0	0	0	0.0221	0.0559	0.0715	0.0923	0.117	0.429	0.6071	0.039	0.0442	0.0585	0.1261	0.0767	0.0845	0.0416	0.2522	1.2051	0.0572	0.1066
46	Glutamate	4.62234	1.3702	12.9181	3.5334	2.0033	3.5503	1.3702	2.4375	2.8834	2.3595	6.1048	4.4759	4.6748	3.0732	1.9838	5.7525	5.109	5.8591	3.783	2.8795	5.6979	7.9404	6.214	5.7603	4.2679	6.1451	12.9181	3.4164	4.8386	3.9065	5.1207	4.134	3.8558	7.2436
47	Glutamine	0.753874	0.3107	2.9081	0.9607	0.4849	0.702	0.4901	0.5824	0.5421	0.559	0.8151	0.5642	1.0842	0.6266	0.4992	0.7085	0.9841	0.7111	0.7397	0.6253	0.6968	1.0465	0.8255	0.676	0.9126	2.9081	0.5811	0.5824	0.7631	0.3107	0.4238	0.6175	0.7098	0.637
48	4-Aminobutyrate	0.0482258	0	0.1729	0.0442	0.0468	0.0273	0.0416	0.0247	0.0468	0.039	0.052	0.0286	0.0234	0.0572	0.0312	0.0195	0.0143	0.0819	0.0325	0.0325	0.0455	0.078	0.1729	0.0715	0.0299	0.039	0.1092	0.0585	0	0.0078	0.1313	0.026	0.0299	0.052
49	Ornithine	0.169042	0.0286	0.4732	0.2691	0.0286	0.1625	0.0741	0.1521	0.1352	0.1794	0.1287	0.2353	0.1066	0.1287	0.0715	0.2743	0.2002	0.0793	0.2132	0.1846	0.2548	0.1495	0.1794	0.2262	0.2587	0.1287	0.4732	0.1508	0.117	0.0637	0.1326	0.1664	0.1612	0.1547
50	Citrulline	0.836068	0	2.2022	1.2779	0.2041	0.5343	0.0663	0.3185	0.5772	0.4771	1.0946	0.7878	1.5691	0.6747	0.4992	1.1024	0.8931	0.9802	0.6708	1.1713	1.2285	1.3325	0.39	1.0062	0.858	1.4274	2.2022	0.8086	0.8853	0.5486	0	0.2756	0.7189	1.3377
51	Glycine	1.00423	0.5837	2.0345	1.0296	0.6851	0.78	0.6812	0.5837	0.7423	0.8515	0.8658	0.7735	0.9074	1.0998	0.8658	0.9048	1.2194	0.7644	1.0335	1.0933	0.9685	1.7511	1.1726	0.9412	1.4625	2.0345	1.2389	0.7111	1.2428	0.9113	0.7878	1.3936	0.9581	0.676
52	Histidine	0.136626	0.0364	0.2613	0.1573	0.1612	0.1573	0.182	0.0858	0.0949	0.1456	0.2405	0.1859	0.0845	0.156	0.2288	0.0429	0.0806	0.1131	0.1573	0.0871	0.1105	0.1547	0.169	0.0897	0.1586	0.1911	0.0689	0.1144	0.13	0.0845	0.2613	0.2015	0.0364	0.104
53	Isoleucine	1.41163	0.3744	3.9208	1.3884	0.5382	0.9659	0.6877	0.6448	0.8827	0.8684	1.1635	1.2285	1.4989	1.2805	0.8879	2.1879	2.4115	1.508	1.2454	1.3962	1.3104	2.5688	0.9451	1.3494	1.8811	2.6819	3.9208	1.0088	1.7095	1.0868	0.3744	0.6903	1.7537	1.6952
54	Leucine	1.90098	1.0465	3.9364	2.1177	1.3377	1.3364	1.1518	1.1947	1.2818	1.4755	1.7641	1.6146	2.1502	1.7433	1.7147	2.4271	2.5831	1.9643	1.7303	2.1931	1.7147	2.6741	1.1908	1.9032	2.3972	3.2344	3.9364	1.6328	2.1034	1.7472	1.0465	1.2116	2.1671	2.1905
55	2-Oxoisocaproate	0.312419	0.0494	0.8346	0.2457	0.1443	0.2106	0.0988	0.2444	0.2366	0.1053	0.8346	0.4576	0.5746	0.1469	0.078	0.6383	0.312	0.6357	0.1079	0.1677	0.7761	0.4381	0.195	0.3705	0.2184	0.2808	0.6812	0.3068	0.2392	0.1573	0.0884	0.0494	0.247	0.3978
56	3-Methyl-2-oxovalerate	0.384255	0.0741	2.0514	0.2925	0.1495	0.2158	0.0767	0.2652	0.2093	0.1248	0.8944	0.4134	0.5317	0.1755	0.0741	0.8372	0.3835	0.6136	0.1443	0.1092	0.9269	0.7475	0.1794	0.3705	0.2639	0.2743	2.0514	0.2184	0.208	0.1625	0.1352	0.104	0.2951	0.4641
57	Lysine	1.61586	0.9269	3.6478	1.6627	1.0348	1.2558	1.0335	1.1661	1.3975	1.4131	2.1333	1.5119	1.9396	1.3741	1.157	2.1138	1.9825	1.7602	1.3585	1.326	1.7706	2.4635	1.1258	1.5626	1.69	1.9864	3.6478	1.547	1.4482	1.3481	0.9269	1.1973	1.5132	2.2438
58	Glutarate	0.144929	0.0364	0.403	0.2002	0.0819	0.1352	0.1183	0.0416	0.1534	0.1027	0.117	0.091	0.1677	0.1352	0.0364	0.0637	0.117	0.1209	0.1274	0.1924	0.1885	0.2561	0.0832	0.143	0.0988	0.2145	0.1963	0.1937	0.1313	0.2353	0.403	0.0754	0.1235	0.1482
59	Methionine	0.679145	0.26	1.1882	0.6708	0.3523	0.6292	0.3458	0.442	0.6019	0.494	1.1882	0.9178	1.0101	0.5226	0.4186	0.819	0.9542	0.9815	0.5902	0.3796	0.923	0.9984	0.3224	0.7085	0.7358	0.8567	0.9828	0.624	0.6825	0.5811	0.26	0.3653	0.5824	1.1128
60	Phenylalanine	0.979361	0.4745	2.4583	0.9152	0.5265	0.767	0.6305	0.5889	0.8281	0.7852	1.1856	0.8697	1.1687	0.8476	0.7358	1.3676	1.3468	1.1193	0.8385	0.9321	1.0114	1.5912	0.6175	0.8801	1.1583	1.5665	2.4583	0.6565	1.0413	0.7891	0.4745	0.5473	0.9932	1.1219
61	Proline	0.870497	0.3211	2.3205	0.7189	0.5421	0.6409	0.325	0.3211	0.6201	0.6656	1.1219	0.611	0.5161	0.6656	0.4368	1.3936	1.3702	1.3195	0.7176	0.5655	0.8034	1.7056	1.1453	1.2584	0.7241	1.3143	2.3205	0.5239	0.6253	0.7943	0.7254	0.5174	0.9334	1.0426
62	Serine	0.688077	0.3523	1.8759	0.9269	0.5226	0.6669	0.5304	0.3952	0.4511	0.5356	1.8759	0.4667	1.0621	0.6968	0.598	0.3835	0.5278	0.3835	0.7683	1.1388	0.3523	0.6344	0.7475	0.6071	1.0153	1.0465	0.6591	0.7722	0.6149	0.5551	0.8372	0.65	0.3536	0.5551
63	Threonine	1.31396	0.5304	2.6351	0.8125	0.6565	1.1583	0.7358	0.5564	1.1024	0.6279	1.4586	1.2168	1.378	1.1505	0.5304	1.9968	2.1242	1.2896	1.1531	1.183	1.8551	2.6351	1.0751	1.5275	1.5444	2.1437	2.6104	0.7592	1.5288	0.9347	1.1661	0.9269	1.4976	1.3975
64	Tryptophan	0.12111	0	0.2938	0.1326	0.0871	0.1352	0.1235	0.0806	0.0819	0.104	0	0.1339	0.2938	0.1534	0.1287	0.1755	0.1833	0.0858	0.0988	0.0858	0.1014	0.1339	0.0936	0.1053	0.156	0.2145	0.1482	0.091	0.1313	0.1326	0.0572	0.1079	0.0923	0.1053
65	Tyrosine	0.95051	0.4017	2.2256	0.8294	0.6305	0.6942	0.5785	0.6084	0.7475	0.6682	1.4573	0.8606	1.4014	0.832	0.7475	1.2155	1.1869	1.1037	0.923	0.9113	1.0608	1.4066	0.6188	0.845	1.1921	1.3143	2.2256	0.6578	0.9048	0.806	0.4017	0.4615	0.9009	1.274
66	Valine	1.73097	0.6825	4.4135	1.2792	0.8281	1.2454	0.7514	0.9113	1.4716	1.1349	1.404	1.2103	1.6679	1.1453	1.118	3.1746	2.8717	1.8239	1.4352	1.4235	1.6367	3.1824	1.3091	2.0228	2.1892	3.4671	4.4135	1.4534	1.7108	1.2688	0.6825	1.0166	2.2165	2.1944
67	Alpha-ketoisovaletate	0.204645	0.0364	1.0023	0.1768	0.0936	0.1274	0.0598	0.1378	0.1313	0.0572	0.4147	0.2119	0.286	0.0858	0.0598	0.4095	0.1846	0.2899	0.0988	0.091	0.4485	0.4316	0.0754	0.1872	0.143	0.1456	1.0023	0.2158	0.1456	0.1053	0.0364	0.0689	0.1612	0.2613
68	Creatine	0.120481	0.0156	0.6916	0.0468	0.0338	0.1547	0.0156	0.052	0.0884	0.1274	0.0663	0.0403	0.1183	0.1066	0.026	0.1066	0.0858	0.1495	0.0494	0.0663	0.0728	0.1313	0.6916	0.1274	0.0715	0.1391	0.2067	0.0598	0.13	0.0481	0.5395	0.0611	0.0884	0.0338
69	2-Aminobutyrate	0.111003	0.0234	0.2574	0.0754	0.0702	0.0416	0.0676	0.0325	0.0572	0.0702	0.1196	0.0559	0.117	0.0234	0.0338	0.0364	0.0325	0.052	0.1261	0.2184	0.1079	0.1053	0.0676	0.2574	0.0988	0.1651	0.0819	0.2249	0.2184	0.1742	0.0962	0.1131	0.2496	0.2509
70	1,3-Dihydroxyacetone	0.040971	0.0156	0.0689	0.0572	0.0455	0.0416	0.0442	0.0429	0.0572	0.0416	0.0429	0.0338	0.0325	0.0351	0.0325	0.052	0.0416	0.0611	0.0637	0.0299	0.0325	0.0273	0.0312	0.0572	0.0442	0.0299	0.0156	0.0429	0.039	0.0689	0.0312	0.0156	0.0286	0.0507
71	Pyruvate hydrate	1.60932	0.884	2.6806	1.6341	0.9451	1.5002	0.9334	0.884	1.5171	1.4014	2.0215	1.6042	2.2919	1.5392	1.1154	1.4872	1.8083	1.9422	1.716	1.8278	1.1609	1.7875	0.9971	1.8278	2.3153	2.6806	1.0309	1.8772	2.0878	1.4677	1.1843	1.2662	1.8876	2.1489
72	Malonate	0.206994	0.0338	0.8255	0.0741	0.0806	0.1196	0.0663	0.0962	0.1352	0.078	0.494	0.1495	0.2262	0.221	0.0338	0.1612	0.2418	0.2548	0.1417	0.1053	0.1521	0.1755	0.4043	0.0416	0.1157	0.3263	0.2145	0.1703	0.104	0.1508	0.8255	0.7553	0.1222	0.1794
73	Citrate	0.0725484	0.0221	0.1443	0.0949	0.0949	0.0962	0.0559	0.0559	0.1053	0.1443	0.0481	0.0741	0.0637	0.1027	0.1144	0.0819	0.0611	0.0715	0.0286	0.0884	0.0754	0.0442	0.0325	0.0338	0.0832	0.0416	0.078	0.0689	0.1378	0.0299	0.0221	0.0494	0.0897	0.0806
74	cis-Aconitate	0.109368	0	0.2483	0.2483	0.1625	0.1859	0.0949	0.1534	0.1391	0.1768	0	0.0468	0.1638	0.2431	0.1677	0	0.0962	0	0.1118	0.182	0.0338	0	0	0	0.1547	0.0858	0.1118	0.2301	0.1001	0.0715	0.0767	0.1677	0.0728	0.1131
75	2-Oxoglutarate	0.453532	0.0312	2.184	0.1521	0.1378	0.1976	0.0338	0.2418	0.1638	0.0663	2.184	0.6201	0.4823	0.1118	0.0312	0.767	0.273	0.7813	0.1274	0.1053	1.2337	0.858	0.4576	0.3575	0.1274	0.2366	2.0969	0.3094	0.1755	0.1365	0.1755	0.4524	0.2197	0.7462
76	Succinate	0.725652	0.039	3.5828	1.9578	0.8996	1.6562	0.2028	0.5161	3.5828	2.6884	0.2626	0.1625	0.6175	2.4804	0.5733	0.2067	0.7826	0.1469	0.1846	1.8538	0.1131	0.0676	0.0858	0.1664	0.2418	0.572	0.1573	0.2314	1.1232	0.1235	0.4056	0.039	0.3081	0.0858
77	Fumarate	0.0505323	0	0.1404	0.0897	0.0455	0.0741	0.0247	0.0416	0.0845	0.1066	0	0.0364	0.0312	0.0507	0.0455	0.0312	0.0364	0.0221	0.0585	0.0494	0.013	0.0195	0.0442	0.0663	0.0702	0.1053	0.013	0.0507	0.0494	0.0351	0.1404	0.0546	0.0507	0.026
78	Malate	0.179903	0	0.4589	0.3835	0.2132	0.1742	0.1443	0	0.3445	0.312	0.0832	0.2704	0.2132	0.2054	0.2262	0.0494	0.0936	0.2457	0.1768	0.1807	0.0598	0	0.13	0.1469	0.169	0.1014	0.0897	0.1755	0.2171	0.0884	0.4589	0.2769	0.1846	0.1625
79	Glycerol	1.00582	0.3406	1.5691	1.2519	0.5057	1.547	0.7891	1.2584	1.4781	0.7592	1.4859	0.9269	1.1752	1.5691	0.5902	1.2194	1.4144	1.3234	0.9802	0.9763	0.9516	0.9321	0.3796	0.8762	1.1323	0.5525	0.8229	1.2103	0.9386	1.0062	0.3406	0.3796	0.9971	1.4105
80	Choline	0.0581226	0.0182	0.104	0.0858	0.0494	0.0741	0.0988	0.0572	0.0858	0.0767	0.104	0.0715	0.0559	0.0689	0.0403	0.0897	0.052	0.0507	0.0559	0.0442	0.0351	0.0481	0.0611	0.0637	0.0533	0.0572	0.0507	0.0442	0.0325	0.0338	0.0182	0.0403	0.0338	0.0689
81	Betaine	0.051329	0.0013	0.0962	0.0468	0.052	0.0195	0.0351	0.0208	0.0455	0.0533	0.065	0.0702	0.0767	0.0364	0.0013	0.0702	0.0832	0.0897	0.0338	0.0455	0.0403	0.0871	0.0286	0.0546	0.0741	0.0754	0.0962	0.0403	0.0637	0.0286	0.0208	0.0338	0.0585	0.0442
82	Nicotinate	0.183426	0.0715	0.5213	0.1378	0.0949	0.13	0.0754	0.1248	0.1235	0.1014	0.5213	0.2197	0.2067	0.1027	0.0871	0.2366	0.1534	0.3159	0.1248	0.0715	0.273	0.1976	0.2873	0.1352	0.1508	0.156	0.2951	0.1638	0.1599	0.1703	0.3016	0.1677	0.0767	0.3237
83	Uracil	1.30637	0.2509	4.9023	0.8125	0.3627	0.5538	0.3497	0.3185	0.8502	0.663	1.3065	0.5668	0.5629	0.4953	0.2509	2.0527	1.4677	1.378	0.9503	0.8411	2.1333	3.419	1.5106	1.7745	0.9867	1.8304	4.9023	1.0816	1.6432	1.0114	1.1583	1.5704	1.5431	2.1502
84	Uridine	0.0506161	0	0.0949	0.0533	0.0234	0.0338	0.0338	0.0325	0.0949	0.0637	0.0572	0.0494	0.0741	0.0845	0.0364	0.0884	0.078	0.0676	0.0598	0.0936	0.0897	0.0299	0.0182	0.0377	0.0299	0	0.0338	0.0208	0.0234	0.065	0.0845	0.0325	0.0234	0.0559
85	Uridine Mono Phosphate	0.124465	0	0.3042	0.208	0.1573	0.1521	0.0897	0.1417	0.2015	0.1612	0.1976	0.2483	0.0702	0.2301	0.0819	0.0585	0.0221	0.2535	0.1196	0.195	0.1599	0	0	0	0.2379	0.0325	0	0.1781	0.0455	0.195	0.3042	0.1001	0.0169	0
86	Uridine Mono Phosphate - glucose	0.129161	0	0.2912	0.1404	0.1404	0.1105	0.104	0.1482	0.182	0.1612	0.2132	0.1196	0.2158	0.1885	0.1456	0.0806	0.1482	0.2912	0.1092	0.1534	0.1638	0	0.0637	0	0.1066	0.0559	0	0.1586	0.169	0.1495	0	0.1404	0.104	0.2405
87	Cytidine	0.0338	0	0.3432	0.0325	0.0182	0.0169	0	0	0	0	0.0741	0	0.1118	0	0	0.0702	0	0.0533	0	0	0.1092	0	0	0	0	0.3432	0	0.0312	0	0.0884	0	0.0416	0	0.0572
88	Cytidine mono Phosphate	0.330326	0	0.728	0.3666	0.3588	0.4329	0.1352	0.2626	0.481	0.5031	0.5109	0.6721	0.2782	0.3172	0.2626	0.1573	0	0.637	0.5707	0.52	0.5109	0	0	0	0.6786	0	0	0.4992	0	0.6305	0.728	0.5876	0	0.1391
89	Deoxycytidine Mono Pphosphate	1.15956	0	4.069	0.7878	0.3874	0.7215	0	0.5694	1.1557	1.2402	0.8008	1.365	1.6198	1.0946	0	1.7875	2.0098	1.5054	2.1554	1.7121	4.069	0	0	0	2.236	0	0	1.625	1.326	2.0878	3.1746	1.8278	0	0.6877
90	Adenosine	0.0399645	0.0078	0.0988	0.0299	0.0078	0.013	0.0156	0.0208	0.013	0.0247	0.0195	0.0091	0.0832	0.0416	0.0234	0.0598	0.0468	0.0754	0.0442	0.0663	0.0598	0.0988	0.0455	0.0455	0.0702	0.0481	0.013	0.0325	0.0364	0.0273	0.0494	0.039	0.0234	0.0559
91	Adenosine Mono Phosphate	0.0507419	0	0.247	0.1001	0.0702	0.1014	0.0273	0.0598	0.0858	0.0728	0.0689	0.1066	0.0624	0.0507	0.0273	0.052	0	0.0364	0.0442	0.0507	0.0195	0	0	0	0.0325	0.247	0	0.0585	0	0.0468	0.1274	0.0078	0.0169	0
92	Guanosine Tri Phosphate	0.2145	0	0.871	0.1742	0.2951	0.0507	0.1664	0.2002	0.3705	0.3432	0.2769	0.3705	0.2366	0.2899	0.195	0.1326	0.1274	0.2678	0.2561	0.1846	0.1157	0.0923	0	0	0.2379	0.871	0.0338	0.3393	0.1183	0.2054	0.2964	0.208	0.0247	0.169
93	Inosine Tri Phosphate	0.0502806	0	0.1248	0.0676	0.0429	0.0455	0.0052	0.0338	0.065	0.0507	0.0325	0.1001	0.0702	0.0494	0	0.0364	0	0.0559	0.0923	0.0754	0.0949	0.065	0	0	0.0897	0.0377	0.0793	0.0741	0.0156	0.0715	0.1248	0.065	0	0.0182
94	Hypoxanthine	0.681494	0.1781	1.9552	0.4329	0.2171	0.3705	0.1781	0.2834	0.4056	0.2951	1.2896	0.5603	0.6032	0.3744	0.3016	1.1817	0.7215	0.8749	0.5915	0.4407	1.1115	1.1089	0.611	0.8281	0.5954	0.7007	1.9552	0.5447	0.6786	0.7293	0.7124	0.5499	0.6565	1.222
95	Xanthine	0.764232	0.1521	2.5467	0.2847	0.2041	0.3081	0.1859	0.1521	0.3523	0.3081	1.0218	0.3926	0.234	0.2249	0.2743	1.2662	0.8918	0.7631	0.7124	0.4901	1.4027	1.7212	0.8918	1.0543	0.9997	0.9529	2.5467	0.4875	0.9529	0.9165	0.7241	0.8372	0.6994	1.4378
96	Xanthosine	0.0107774	0	0.1053	0	0	0	0	0	0	0	0	0	0	0	0	0.1053	0.0832	0	0	0	0	0	0	0	0	0	0.0715	0	0	0	0.0117	0	0.0325	0.0299

## Sheet: mmolkg-1
Profiled Data Type	13	Concentrations ( mmol.kg-1 )			conversion mmol.l-1 to mmol.kg-1: vol in uL/starting mat in mg= dil factor; multiply the values in mmol.l-1 by 13 to get the values in unit mmol.kg-1
Export Date		Mon Nov 29 08:34:28 GMT 2021		we chose 13 with Em like in June, see Cecum weights.xlsx
	italic: tentative assignment (caproate, caprylate, acetoin-like unknown, pyruvate hydrate, phloretate, cis-aconitate)	20211111-__flat_ex11_p1.cnx	20211111-__flat_ex20_p1.cnx	20211111-__flat_ex30_p1.cnx	20211111-__flat_ex40_p1.cnx	20211111-__flat_ex50_p1.cnx	20211111-__flat_ex60_p1.cnx	20211111-__flat_ex70_p1.cnx	20211111-__flat_ex80_p1.cnx	20211111-__flat_ex90_p1.cnx	20211111-__flat_ex100_p1.cnx	20211111-__flat_ex110_p1.cnx	20211111-__flat_ex120_p1.cnx	20211111-__flat_ex132_p1.cnx	20211111-__flat_ex142_p1.cnx	20211111-__flat_ex150_p1.cnx	20211111-__flat_ex160_p1.cnx	20211111-__flat_ex170_p1.cnx	20211111-__flat_ex180_p1.cnx	20211111-__flat_ex191_p1.cnx	20211111-__flat_ex202_p1.cnx	20211111-__flat_ex211_p1.cnx	20211111-__flat_ex220_p1.cnx	20211111-__flat_ex232_p1.cnx	20211111-__flat_ex241_p1.cnx	20211111-__flat_ex250_p1.cnx	20211111-__flat_ex261_p1.cnx	20211111-__flat_ex270_p1.cnx	20211111-__flat_ex280_p1.cnx	20211111-__flat_ex290_p1.cnx	20211111-__flat_ex302_p1.cnx	20211111-__flat_ex310_p1.cnx
20211111-__flat		11	20	30	40	50	60	70	80	90	100	110	120	130	140	150	160	170	180	190	200	210	220	230	240	250	260	270	280	290	300	310
Animals' identification number		1B	2B	3B	4B	5B	9B	10B	1R	2R	3R	4R	5R	9R	10R	11R	1N	2N	3N	4N	5N	6N	7N	8N	1V	2V	3V	4V	5V	6V	7V	8V
Treatment		DNBS + FMTCTR	DNBS + FMTCTR	DNBS + FMTCTR	DNBS + FMTCTR	DNBS + FMTCTR	DNBS + FMTCTR	DNBS + FMTCTR	DNBS + FMTDNBS	DNBS + FMTDNBS	DNBS + FMTDNBS	DNBS + FMTDNBS	DNBS + FMTDNBS	DNBS + FMTDNBS	DNBS + FMTDNBS	DNBS + FMTDNBS	abx + FMTCTR	abx + FMTCTR	abx + FMTCTR	abx + FMTCTR	abx + FMTCTR	abx + FMTCTR	abx + FMTCTR	abx + FMTCTR	abx + FMTDNBS	abx + FMTDNBS	abx + FMTDNBS	abx + FMTDNBS	abx + FMTDNBS	abx + FMTDNBS	abx + FMTDNBS	abx + FMTDNBS
FMT type	Comments	Therapeutic	Therapeutic	Therapeutic	Therapeutic	Therapeutic	Therapeutic	Therapeutic	Therapeutic	Therapeutic	Therapeutic	Therapeutic	Therapeutic	Therapeutic	Therapeutic	Therapeutic	patho	patho	patho	patho	patho	patho	patho	patho	patho	patho	patho	patho	patho	patho	patho	patho
1,3-Dihydroxyacetone		0.0572	0.0455	0.0416	0.0442	0.0429	0.0572	0.0416	0.0429	0.0338	0.0325	0.0351	0.0325	0.052	0.0416	0.0611	0.0637	0.0299	0.0325	0.0273	0.0312	0.0572	0.0442	0.0299	0.0156	0.0429	0.039	0.0689	0.0312	0.0156	0.0286	0.0507
2,3-Butanediol		0.2054	0.0247	0.1222	0.0351	0.1014	0.0663	0.0741	0.0676	0.2665	0.0364	0.0754	0.0676	0.0819	0.0364	0.0208	0.0949	0.0481	0.0338	0.0494	0.0429	0	0.104	0.0702	0.091	0.0442	0.0273	0.0351	0.0078	0.0221	0.0702	0.039
2-Aminobutyrate		0.0754	0.0702	0.0416	0.0676	0.0325	0.0572	0.0702	0.1196	0.0559	0.117	0.0234	0.0338	0.0364	0.0325	0.052	0.1261	0.2184	0.1079	0.1053	0.0676	0.2574	0.0988	0.1651	0.0819	0.2249	0.2184	0.1742	0.0962	0.1131	0.2496	0.2509
2-Hydroxyisovalerate		0.0169	0	0	0	0	0.0221	0.0182	0	0	0	0	0	0	0	0	0	0.0273	0	0	0.0312	0.0091	0.0195	0	0	0	0	0	0.0663	0.0247	0	0.0234
2-Oxoglutarate		0.1521	0.1378	0.1976	0.0338	0.2418	0.1638	0.0663	2.184	0.6201	0.4823	0.1118	0.0312	0.767	0.273	0.7813	0.1274	0.1053	1.2337	0.858	0.4576	0.3575	0.1274	0.2366	2.0969	0.3094	0.1755	0.1365	0.1755	0.4524	0.2197	0.7462
2-Oxoisocaproate		0.2457	0.1443	0.2106	0.0988	0.2444	0.2366	0.1053	0.8346	0.4576	0.5746	0.1469	0.078	0.6383	0.312	0.6357	0.1079	0.1677	0.7761	0.4381	0.195	0.3705	0.2184	0.2808	0.6812	0.3068	0.2392	0.1573	0.0884	0.0494	0.247	0.3978
2-methylbutyric_ifr	2- methylbutyrate	0.1326	0.2041	0.1157	0.0806	0.0533	0.1118	0.0832	0.2366	0.1274	0.1989	0.1144	0.0897	0.1547	0.0988	0.2132	0.1521	0.1365	0.3822	0.2756	0.026	0.1677	0.1235	0.2028	0.5967	0.2977	0.1352	0.1131	0.1482	0.1625	0.1742	0.1846
3-(3-Hydroxyphenyl)-3-hydroxypropanoic acid	3-(3-Hydroxyphenyl)-3-hydroxypropanoate	0.0455	0.0273	0.0156	0.0247	0.0221	0.0377	0.0702	0.0091	0.0221	0	0.0403	0.0195	0.0221	0.0182	0.0234	0.4433	0.4004	0.0286	0.039	0.1937	0.0338	0.0273	0.3315	0.0767	0.0338	0.0065	0.0247	0.6045	0.2691	0.0182	0.0273
3-Hydroxybutyrate		0.0234	0	0.0286	0	0.0156	0	0.0195	0.0715	0.6955	0.1443	0.1716	0.0923	0.7566	0.0143	0.0598	0	0	0.0494	0.0676	0	0	0	0.0325	0.3016	0.1352	0.0858	0.0689	0.0442	0.078	0.0533	0.0507
3-Hydroxyphenylacetate		0.2197	0.1456	0.0767	0.0546	0.0741	0.1144	0.2457	0.0494	0.0624	0.0728	0.1989	0.0286	0.0507	0.0429	0.0754	0.2522	0.2249	0.0936	0.0858	0.0364	0.0741	0.1066	0.2912	0.052	0.1339	0.0611	0.0689	0	0.1898	0.0377	0.0559
3-Methyl-2-oxovalerate		0.2925	0.1495	0.2158	0.0767	0.2652	0.2093	0.1248	0.8944	0.4134	0.5317	0.1755	0.0741	0.8372	0.3835	0.6136	0.1443	0.1092	0.9269	0.7475	0.1794	0.3705	0.2639	0.2743	2.0514	0.2184	0.208	0.1625	0.1352	0.104	0.2951	0.4641
3-Phenylpropionate		0.3341	0.1911	0.1365	0.364	0.2392	0.4654	0.208	0.5005	0.3536	0.3562	0.2886	0.26	0.4355	0.3055	0.4251	0.234	0.2444	0.3458	0.3055	0.1417	0.2548	0.4199	0.4251	0.455	0.2171	0.4277	0.3185	0.1235	0.2184	0.3861	0.3419
4-Aminobutyrate		0.0442	0.0468	0.0273	0.0416	0.0247	0.0468	0.039	0.052	0.0286	0.0234	0.0572	0.0312	0.0195	0.0143	0.0819	0.0325	0.0325	0.0455	0.078	0.1729	0.0715	0.0299	0.039	0.1092	0.0585	0	0.0078	0.1313	0.026	0.0299	0.052
4-Hydroxyphenylacetate		0.5434	0.2158	0.2041	0.0806	0.0416	0.3042	0.221	0.1079	0.0858	0.0806	0.1976	0.0884	0.0468	0.0637	0.0429	0.2782	0.3484	0.2496	0.4186	0.1092	0.3861	0.2093	0.6058	0.4485	0.4745	0.2171	0.0949	0.1144	0.0923	0.3939	0.1677
5-Aminopentanoate		0.1209	0.3445	0.0533	0.0611	0.0793	0.0923	0.1417	0.1586	0.1105	0.1157	0.0637	0.0455	0.0793	0.0598	0.1859	0.0338	0.0728	0.0845	0.1976	0.481	0.1183	0.0455	0.1495	0.2379	0.1092	0.0728	0.0741	0.5863	0.4953	0.0975	0.1625
AMP	Adenosine Mono Phosphate	0.1001	0.0702	0.1014	0.0273	0.0598	0.0858	0.0728	0.0689	0.1066	0.0624	0.0507	0.0273	0.052	0	0.0364	0.0442	0.0507	0.0195	0	0	0	0.0325	0.247	0	0.0585	0	0.0468	0.1274	0.0078	0.0169	0
Acetate		26.312	32.201	30.0547	51.8232	43.9348	37.05	30.9608	44.3339	47.0808	41.8145	41.2321	36.3103	52.7579	47.8231	51.2642	33.6713	26.2236	33.02	21.6554	33.0096	25.428	31.0557	21.879	29.3046	20.4412	31.7213	28.6533	37.0955	19.344	20.4893	31.642
Acetoacetate		0.1079	0.0975	0.1443	0.1144	0.1313	0.0754	0.0663	0.338	0.7124	0.1404	0.2483	0.1651	0.9074	0.0637	0.0728	0.0728	0.0403	0.0754	0.1625	0.0247	0.0598	0.0442	0.1157	0.0923	0	0.0858	0.0429	0.026	0.0273	0.0702	0.1261
Acetoin	acetoin use to quantif unknown of similar structure CH3CH-CO-X	0.0624	0.0195	0.0468	0.0247	0.0416	0.0546	0.0533	0.0611	0.0429	0.0208	0.0416	0.0299	0.1287	0.0234	0.0871	0.0624	0.052	0.3757	0.0702	0.0338	0.0728	0.0429	0.3796	0.1521	0.4966	0.3913	0.2392	0.2379	0.0065	0.2535	0.0832
Adenosine		0.0299	0.0078	0.013	0.0156	0.0208	0.013	0.0247	0.0195	0.0091	0.0832	0.0416	0.0234	0.0598	0.0468	0.0754	0.0442	0.0663	0.0598	0.0988	0.0455	0.0455	0.0702	0.0481	0.013	0.0325	0.0364	0.0273	0.0494	0.039	0.0234	0.0559
Alanine		0.4641	0.4446	0.3588	0.5811	0.3263	0.3549	0.481	0.3562	0.3198	0.4667	0.3588	0.507	0.1287	0.2392	0.3042	0.4147	0.6747	0.2834	0.1976	0.4966	0.2496	0.468	0.3107	0.3692	0.3406	0.2691	0.2834	0.6682	0.7891	0.1742	0.2262
Alpha-ketoisovaleric acid	Alpha-ketoisovaletate	0.1768	0.0936	0.1274	0.0598	0.1378	0.1313	0.0572	0.4147	0.2119	0.286	0.0858	0.0598	0.4095	0.1846	0.2899	0.0988	0.091	0.4485	0.4316	0.0754	0.1872	0.143	0.1456	1.0023	0.2158	0.1456	0.1053	0.0364	0.0689	0.1612	0.2613
Arabinose		0.6591	1.1843	0.4849	0.7124	0.9802	0.9529	0.7982	0.6136	0.4654	0.7761	1.1258	1.0985	0.7826	0.8593	0.5057	0.3185	0.416	0.2028	0.104	0.6136	0.1469	0.6474	0.3458	0.1729	0.3614	0.5421	0.5564	1.2025	0.3679	0.2483	0.2561
Asparagine		0.2977	0.4251	0.4927	0.4043	0.2158	0.1703	0.2613	0.4147	0.1443	0.6136	0.5356	0.4251	0.208	0.6435	0.2782	0.5421	0.715	0.5876	0.2548	0	0.1677	0.949	0.169	0.2171	0.5421	0.5525	0.4381	0.1547	0.1105	0.2951	0.182
Aspartate		0.6526	0.26	0.4446	0.1729	0.2639	0.3549	0.3549	0.195	0.5109	0.1807	0.3107	0.2483	0.1378	0.1235	0.3575	0.4017	0.4784	0.1846	0.2119	0.364	0.5447	0.6266	0.3861	0.3211	0.4238	0.4355	0.3276	0.4017	0.637	0.2587	0.3068
Betaine		0.0468	0.052	0.0195	0.0351	0.0208	0.0455	0.0533	0.065	0.0702	0.0767	0.0364	0.0013	0.0702	0.0832	0.0897	0.0338	0.0455	0.0403	0.0871	0.0286	0.0546	0.0741	0.0754	0.0962	0.0403	0.0637	0.0286	0.0208	0.0338	0.0585	0.0442
Butyrate		6.1854	8.5098	5.4327	16.0771	9.3587	8.3174	6.3713	19.9199	9.4302	16.2045	9.1325	10.3597	17.2198	17.7398	19.1555	5.5367	5.6043	20.1864	10.1881	1.2675	4.0248	6.0931	4.0326	13.312	7.9508	7.7467	6.3128	5.785	3.8129	4.0196	7.423
Caproic acid	Caproate	0.6812	0.1586	0.3744	0.2067	0.2639	0.3705	0.1157	0.2808	0.1885	0.533	0.4056	0.2171	0.7696	0.4043	1.1674	0.6019	0.2054	0.1417	0.3133	0	0.3549	0.1456	0.2275	1.3143	0.1131	0.0962	0.1443	0.0598	0.0897	0.1261	0.0546
Caprylate	Caprylate	0.1157	0.1261	0.1911	0.1391	0.1014	0.2171	0.1781	0.3237	0.2197	0.3354	0.2197	0.1066	0.1261	0.143	0.2249	0.1833	0.1768	0.234	0.182	0.0351	0.13	0.1768	0.1911	0.2951	0.2158	0.0858	0.1144	0.0507	0.0624	0.1274	0.0793
Choline		0.0858	0.0494	0.0741	0.0988	0.0572	0.0858	0.0767	0.104	0.0715	0.0559	0.0689	0.0403	0.0897	0.052	0.0507	0.0559	0.0442	0.0351	0.0481	0.0611	0.0637	0.0533	0.0572	0.0507	0.0442	0.0325	0.0338	0.0182	0.0403	0.0338	0.0689
Citrulline		1.2779	0.2041	0.5343	0.0663	0.3185	0.5772	0.4771	1.0946	0.7878	1.5691	0.6747	0.4992	1.1024	0.8931	0.9802	0.6708	1.1713	1.2285	1.3325	0.39	1.0062	0.858	1.4274	2.2022	0.8086	0.8853	0.5486	0	0.2756	0.7189	1.3377
Creatine		0.0468	0.0338	0.1547	0.0156	0.052	0.0884	0.1274	0.0663	0.0403	0.1183	0.1066	0.026	0.1066	0.0858	0.1495	0.0494	0.0663	0.0728	0.1313	0.6916	0.1274	0.0715	0.1391	0.2067	0.0598	0.13	0.0481	0.5395	0.0611	0.0884	0.0338
Cytidine		0.0325	0.0182	0.0169	0	0	0	0	0.0741	0	0.1118	0	0	0.0702	0	0.0533	0	0	0.1092	0	0	0	0	0.3432	0	0.0312	0	0.0884	0	0.0416	0	0.0572
Cytidine monophosphate	Cytidine mono Phosphate	0.3666	0.3588	0.4329	0.1352	0.2626	0.481	0.5031	0.5109	0.6721	0.2782	0.3172	0.2626	0.1573	0	0.637	0.5707	0.52	0.5109	0	0	0	0.6786	0	0	0.4992	0	0.6305	0.728	0.5876	0	0.1391
Desaminotyrosine	Phloretate	0.2158	0	0	0	0	0	0	0	0	0	0	0	0	0	0	0	0	0.4719	0	0	0	0	0	0	0.221	0.2379	0.2392	0.104	0	0.1586	0
Dimethylamine		0.0117	0.0208	0.0156	0.0169	0.0156	0.0286	0.0065	0.0208	0.0182	0.0091	0.0052	0.0754	0.0195	0.0039	0.0156	0.0195	0.0182	0.0143	0.0104	0.0156	0.0078	0.0156	0.0117	0.0169	0.0104	0.0052	0.0117	0.0234	0.0091	0.0104	0.013
Ethanol		0.2509	0.2678	0.3133	0.3731	0.4355	0.3952	0.6448	0.1612	0.2301	0.2418	0.4277	0.2964	0.195	0.2392	0.0975	0.4238	0.4459	0.1105	0.1651	0.3614	0.1547	0.4654	0.182	0.1599	0.2327	0.3133	0.2678	0.6227	0.3679	0.312	0.1144
Formate		0.1209	0.0507	0.0754	0.052	0.0572	0.0689	0.1105	0.1131	0.1131	0.0533	0.0611	0.065	0.2158	0.1781	0.0975	0.0871	0.091	0.1196	0.2223	0.1131	0.2015	0.1768	0.2717	0.2314	0.0806	0.1365	0.0793	0.052	0.0962	0.1898	0.1053
Fucose		0.1638	0.221	0.2431	0.2067	0.234	0.2873	0.2145	0.1742	0.2184	0.2873	0.2834	0.3588	0.2535	0.2743	0.2106	0.2808	0.2158	0.2912	0.3679	0.2457	0.3419	0.5343	0.3159	0.4589	0.3367	0.2938	0.234	0.3094	0.3211	0.2743	0.1625
Fumarate		0.0897	0.0455	0.0741	0.0247	0.0416	0.0845	0.1066	0	0.0364	0.0312	0.0507	0.0455	0.0312	0.0364	0.0221	0.0585	0.0494	0.013	0.0195	0.0442	0.0663	0.0702	0.1053	0.013	0.0507	0.0494	0.0351	0.1404	0.0546	0.0507	0.026
GTP	Guanosine Tri Phosphate	0.1742	0.2951	0.0507	0.1664	0.2002	0.3705	0.3432	0.2769	0.3705	0.2366	0.2899	0.195	0.1326	0.1274	0.2678	0.2561	0.1846	0.1157	0.0923	0	0	0.2379	0.871	0.0338	0.3393	0.1183	0.2054	0.2964	0.208	0.0247	0.169
Galactose		0.6032	0.3055	0.6474	0.39	0.3783	0.4771	0.4212	0.5811	0.5408	0.3809	0.6214	0.455	0.9087	0.7371	0.5889	0.4732	0.3952	0.4459	0.9685	0.8294	0.7059	1.1375	1.1323	0.7605	0.494	0.5993	0.6318	0.8697	0.8034	0.6942	0.2964
Glucose		6.2829	4.9452	4.498	6.4285	6.3141	8.0691	7.4594	10.8446	5.2091	9.3873	8.8608	7.7545	12.727	9.4146	11.2879	3.0927	2.8236	3.9689	2.1827	6.6001	2.2399	5.0375	5.1415	2.0293	5.642	6.7353	9.0103	8.177	5.6537	4.199	5.4626
Glucose-1-phosphate		0	0.3354	0.1196	0.4771	0.1547	0	0.1092	0	0.1014	0.7137	0.1417	0.4758	0	0	0	0	0	0.1261	0	0	0	0	0	0	0	0	0	0	0	0	0
Glutamate		3.5334	2.0033	3.5503	1.3702	2.4375	2.8834	2.3595	6.1048	4.4759	4.6748	3.0732	1.9838	5.7525	5.109	5.8591	3.783	2.8795	5.6979	7.9404	6.214	5.7603	4.2679	6.1451	12.9181	3.4164	4.8386	3.9065	5.1207	4.134	3.8558	7.2436
Glutamine		0.9607	0.4849	0.702	0.4901	0.5824	0.5421	0.559	0.8151	0.5642	1.0842	0.6266	0.4992	0.7085	0.9841	0.7111	0.7397	0.6253	0.6968	1.0465	0.8255	0.676	0.9126	2.9081	0.5811	0.5824	0.7631	0.3107	0.4238	0.6175	0.7098	0.637
Glutarate		0.2002	0.0819	0.1352	0.1183	0.0416	0.1534	0.1027	0.117	0.091	0.1677	0.1352	0.0364	0.0637	0.117	0.1209	0.1274	0.1924	0.1885	0.2561	0.0832	0.143	0.0988	0.2145	0.1963	0.1937	0.1313	0.2353	0.403	0.0754	0.1235	0.1482
Glycerol		1.2519	0.5057	1.547	0.7891	1.2584	1.4781	0.7592	1.4859	0.9269	1.1752	1.5691	0.5902	1.2194	1.4144	1.3234	0.9802	0.9763	0.9516	0.9321	0.3796	0.8762	1.1323	0.5525	0.8229	1.2103	0.9386	1.0062	0.3406	0.3796	0.9971	1.4105
Glycine		1.0296	0.6851	0.78	0.6812	0.5837	0.7423	0.8515	0.8658	0.7735	0.9074	1.0998	0.8658	0.9048	1.2194	0.7644	1.0335	1.0933	0.9685	1.7511	1.1726	0.9412	1.4625	2.0345	1.2389	0.7111	1.2428	0.9113	0.7878	1.3936	0.9581	0.676
Histidine		0.1573	0.1612	0.1573	0.182	0.0858	0.0949	0.1456	0.2405	0.1859	0.0845	0.156	0.2288	0.0429	0.0806	0.1131	0.1573	0.0871	0.1105	0.1547	0.169	0.0897	0.1586	0.1911	0.0689	0.1144	0.13	0.0845	0.2613	0.2015	0.0364	0.104
Hypoxanthine		0.4329	0.2171	0.3705	0.1781	0.2834	0.4056	0.2951	1.2896	0.5603	0.6032	0.3744	0.3016	1.1817	0.7215	0.8749	0.5915	0.4407	1.1115	1.1089	0.611	0.8281	0.5954	0.7007	1.9552	0.5447	0.6786	0.7293	0.7124	0.5499	0.6565	1.222
IMP	Inosine Tri Phosphate	0.0676	0.0429	0.0455	0.0052	0.0338	0.065	0.0507	0.0325	0.1001	0.0702	0.0494	0	0.0364	0	0.0559	0.0923	0.0754	0.0949	0.065	0	0	0.0897	0.0377	0.0793	0.0741	0.0156	0.0715	0.1248	0.065	0	0.0182
Isobutyrate		0.3627	0.4966	0.3341	0.3029	0.2743	0.3952	0.2886	0.4043	0.481	0.2548	0.4511	0.3419	0.2834	0.2262	0.4511	0.3354	0.1885	0.5148	0.4173	0.4511	0.403	0.1638	1.2402	1.1687	0.3614	1.313	0.3198	0.3757	0.2613	0.2639	0.3627
Isoleucine		1.3884	0.5382	0.9659	0.6877	0.6448	0.8827	0.8684	1.1635	1.2285	1.4989	1.2805	0.8879	2.1879	2.4115	1.508	1.2454	1.3962	1.3104	2.5688	0.9451	1.3494	1.8811	2.6819	3.9208	1.0088	1.7095	1.0868	0.3744	0.6903	1.7537	1.6952
Isovalerate		0.3848	0.2587	0.3237	0.2275	0.1742	0.2769	0.3926	0.4121	0.2184	0.1963	0.3185	0.3029	0.3822	0.156	0.3198	0.3419	0.1625	0.6383	0.4862	0.0507	0.273	0.1937	0.2483	1.2207	0.3445	0.208	0.1417	0.0819	0.2067	0.3172	0.2899
Lactate		2.3036	0.5577	0.6487	0.9425	0.6708	0.8918	1.6913	0.2522	0.3341	0.4043	1.1869	0.6877	0.5356	0.7891	0.3809	1.9032	2.5376	0.5655	0.5564	0.5421	0.7059	2.1112	0.3783	0.4732	0.4797	0.5447	0.2756	0.247	0.3835	0.5278	0.3354
Leucine		2.1177	1.3377	1.3364	1.1518	1.1947	1.2818	1.4755	1.7641	1.6146	2.1502	1.7433	1.7147	2.4271	2.5831	1.9643	1.7303	2.1931	1.7147	2.6741	1.1908	1.9032	2.3972	3.2344	3.9364	1.6328	2.1034	1.7472	1.0465	1.2116	2.1671	2.1905
Lysine		1.6627	1.0348	1.2558	1.0335	1.1661	1.3975	1.4131	2.1333	1.5119	1.9396	1.3741	1.157	2.1138	1.9825	1.7602	1.3585	1.326	1.7706	2.4635	1.1258	1.5626	1.69	1.9864	3.6478	1.547	1.4482	1.3481	0.9269	1.1973	1.5132	2.2438
Malonate		0.0741	0.0806	0.1196	0.0663	0.0962	0.1352	0.078	0.494	0.1495	0.2262	0.221	0.0338	0.1612	0.2418	0.2548	0.1417	0.1053	0.1521	0.1755	0.4043	0.0416	0.1157	0.3263	0.2145	0.1703	0.104	0.1508	0.8255	0.7553	0.1222	0.1794
Methanol		0.7072	0.3172	0.5213	0.5356	0.4615	0.4407	0.5005	0.1794	0.1612	0.468	0.6123	0.4342	0.325	0.5616	0.2353	0.429	0.3809	0.2535	0.2405	0.4576	0.3146	0.5447	0.3705	0.2249	0.5603	0.3523	0.3848	0.4693	0.3497	0.3614	0.3848
Methionine		0.6708	0.3523	0.6292	0.3458	0.442	0.6019	0.494	1.1882	0.9178	1.0101	0.5226	0.4186	0.819	0.9542	0.9815	0.5902	0.3796	0.923	0.9984	0.3224	0.7085	0.7358	0.8567	0.9828	0.624	0.6825	0.5811	0.26	0.3653	0.5824	1.1128
Methylamine		0.0455	0.0793	0.0442	0.13	0.0793	0.0728	0.1352	0.143	0.2587	0.0858	0.1183	0.2405	0.1378	0.1391	0.0858	0.0663	0.1508	0.0923	0.065	0.3276	0.0481	0.0858	0.2353	0.2236	0.1053	0.0832	0.0481	0.013	0.0273	0.0741	0.1053
N-Acetylglucosamine		0.2158	0.2405	0.3627	0.2184	0.2288	0.4017	0.2678	0.3978	0.2587	0.3887	0.2795	0.3172	0.6188	0.5018	0.2886	0.6708	0.3315	0.4264	0.5746	0	0.832	0.5603	0.8671	0.728	0.2912	0.3302	0.3978	0.0728	0.1443	0.7826	0.1378
Nicotinate		0.1378	0.0949	0.13	0.0754	0.1248	0.1235	0.1014	0.5213	0.2197	0.2067	0.1027	0.0871	0.2366	0.1534	0.3159	0.1248	0.0715	0.273	0.1976	0.2873	0.1352	0.1508	0.156	0.2951	0.1638	0.1599	0.1703	0.3016	0.1677	0.0767	0.3237
Ornithine		0.2691	0.0286	0.1625	0.0741	0.1521	0.1352	0.1794	0.1287	0.2353	0.1066	0.1287	0.0715	0.2743	0.2002	0.0793	0.2132	0.1846	0.2548	0.1495	0.1794	0.2262	0.2587	0.1287	0.4732	0.1508	0.117	0.0637	0.1326	0.1664	0.1612	0.1547
Phenylacetate		0.2106	0.1105	0.1482	0.0689	0.0884	0.182	0.2431	0.2002	0.1612	0.1365	0.156	0.0884	0.1131	0.1157	0.1235	0.2392	0.1651	0.2964	0.2717	0.3536	0.1586	0.273	0.3107	0.3302	0.2067	0.2275	0.156	0.3926	0.1534	0.1417	0.2873
Phenylalanine		0.9152	0.5265	0.767	0.6305	0.5889	0.8281	0.7852	1.1856	0.8697	1.1687	0.8476	0.7358	1.3676	1.3468	1.1193	0.8385	0.9321	1.0114	1.5912	0.6175	0.8801	1.1583	1.5665	2.4583	0.6565	1.0413	0.7891	0.4745	0.5473	0.9932	1.1219
Proline		0.7189	0.5421	0.6409	0.325	0.3211	0.6201	0.6656	1.1219	0.611	0.5161	0.6656	0.4368	1.3936	1.3702	1.3195	0.7176	0.5655	0.8034	1.7056	1.1453	1.2584	0.7241	1.3143	2.3205	0.5239	0.6253	0.7943	0.7254	0.5174	0.9334	1.0426
Propionate		4.5253	4.615	5.3859	5.0323	4.29	4.9491	5.8058	6.9238	5.6771	4.6046	6.6807	5.2169	7.0096	4.6748	6.7444	5.8383	3.4671	7.176	2.7781	7.7623	3.9845	3.8792	4.2393	6.7678	4.03	4.8438	4.9127	13.0533	3.6647	4.6748	4.9881
Propylene glycol		0.0403	0.0325	0.0507	0.0169	0.0104	0.0117	0.0247	0.0195	0.052	0.0195	0.026	0	0.0416	0.0091	0.0091	0.0299	0.013	0	0	0.0117	0.026	0.0273	0.0273	0	0.0182	0.013	0.013	0.0078	0.0026	0.0273	0.0221
Putrescine		0.0234	0.0624	0.0221	0.0234	0.0338	0.0572	0.0988	0.0299	0.0234	0.078	0.0585	0.0858	0.0598	0.0208	0.0637	0.0572	0.0442	0.0442	0.065	0.0767	0.1118	0.0416	0.104	0.0546	0.0754	0.0689	0.0884	0	0.13	0.0572	0.0533
Pyruvate	Pyruvate hydrate	1.6341	0.9451	1.5002	0.9334	0.884	1.5171	1.4014	2.0215	1.6042	2.2919	1.5392	1.1154	1.4872	1.8083	1.9422	1.716	1.8278	1.1609	1.7875	0.9971	1.8278	2.3153	2.6806	1.0309	1.8772	2.0878	1.4677	1.1843	1.2662	1.8876	2.1489
Ribose		1.0855	0.546	0.6214	0.1612	0.7579	2.0319	0.923	4.6644	0.9711	1.3338	0.8645	0.6981	3.9819	2.2438	2.5415	2.1775	1.6731	3.4372	7.6778	3.3137	3.8766	2.4765	3.9013	9.3678	1.7329	2.8054	2.6702	2.2113	2.5181	3.6439	4.1275
Serine		0.9269	0.5226	0.6669	0.5304	0.3952	0.4511	0.5356	1.8759	0.4667	1.0621	0.6968	0.598	0.3835	0.5278	0.3835	0.7683	1.1388	0.3523	0.6344	0.7475	0.6071	1.0153	1.0465	0.6591	0.7722	0.6149	0.5551	0.8372	0.65	0.3536	0.5551
Succinate		1.9578	0.8996	1.6562	0.2028	0.5161	3.5828	2.6884	0.2626	0.1625	0.6175	2.4804	0.5733	0.2067	0.7826	0.1469	0.1846	1.8538	0.1131	0.0676	0.0858	0.1664	0.2418	0.572	0.1573	0.2314	1.1232	0.1235	0.4056	0.039	0.3081	0.0858
Sucrose		0.1274	0	0.0793	0.1144	0.0806	0.0403	0.0936	0.1014	0	0.078	0.0299	0	0	0	0.26	0.0169	0	0.0546	0	0	0	0	0	0	0.0442	0	0.0247	0.1209	0	0	0.0897
Threonine		0.8125	0.6565	1.1583	0.7358	0.5564	1.1024	0.6279	1.4586	1.2168	1.378	1.1505	0.5304	1.9968	2.1242	1.2896	1.1531	1.183	1.8551	2.6351	1.0751	1.5275	1.5444	2.1437	2.6104	0.7592	1.5288	0.9347	1.1661	0.9269	1.4976	1.3975
Tryptophan		0.1326	0.0871	0.1352	0.1235	0.0806	0.0819	0.104	0	0.1339	0.2938	0.1534	0.1287	0.1755	0.1833	0.0858	0.0988	0.0858	0.1014	0.1339	0.0936	0.1053	0.156	0.2145	0.1482	0.091	0.1313	0.1326	0.0572	0.1079	0.0923	0.1053
Tyramine		0.0195	0	0	0	0.0403	0	0.091	0	0	0	0	0	0	0	0	0.0104	0.0429	0	0	0	0	0	0.4485	0	0.3003	0.3042	0.1079	0.2925	0	0.2509	0
Tyrosine		0.8294	0.6305	0.6942	0.5785	0.6084	0.7475	0.6682	1.4573	0.8606	1.4014	0.832	0.7475	1.2155	1.1869	1.1037	0.923	0.9113	1.0608	1.4066	0.6188	0.845	1.1921	1.3143	2.2256	0.6578	0.9048	0.806	0.4017	0.4615	0.9009	1.274
UDP-glucose	Uridine Mono Phosphate - glucose	0.1404	0.1404	0.1105	0.104	0.1482	0.182	0.1612	0.2132	0.1196	0.2158	0.1885	0.1456	0.0806	0.1482	0.2912	0.1092	0.1534	0.1638	0	0.0637	0	0.1066	0.0559	0	0.1586	0.169	0.1495	0	0.1404	0.104	0.2405
UMP	Uridine Mono Phosphate	0.208	0.1573	0.1521	0.0897	0.1417	0.2015	0.1612	0.1976	0.2483	0.0702	0.2301	0.0819	0.0585	0.0221	0.2535	0.1196	0.195	0.1599	0	0	0	0.2379	0.0325	0	0.1781	0.0455	0.195	0.3042	0.1001	0.0169	0
Uracil		0.8125	0.3627	0.5538	0.3497	0.3185	0.8502	0.663	1.3065	0.5668	0.5629	0.4953	0.2509	2.0527	1.4677	1.378	0.9503	0.8411	2.1333	3.419	1.5106	1.7745	0.9867	1.8304	4.9023	1.0816	1.6432	1.0114	1.1583	1.5704	1.5431	2.1502
Uridine		0.0533	0.0234	0.0338	0.0338	0.0325	0.0949	0.0637	0.0572	0.0494	0.0741	0.0845	0.0364	0.0884	0.078	0.0676	0.0598	0.0936	0.0897	0.0299	0.0182	0.0377	0.0299	0	0.0338	0.0208	0.0234	0.065	0.0845	0.0325	0.0234	0.0559
Urocanate		0.0819	0.078	0.0364	0.0559	0.0741	0.0598	0.0871	0.0832	0.1053	0.117	0.0806	0.0845	0.0494	0.0806	0.0559	0.0377	0.0689	0.0793	0.0455	0.1261	0.0169	0.1404	0.0533	0.0299	0.0793	0.0533	0.039	0.1326	0	0.0182	0.0572
Valerate		0.4901	0.3809	0.4121	0.7319	0.4004	0.5291	0.4797	1.157	0.6058	1.0465	0.5291	0.4758	0.9386	0.4953	1.0595	0.4342	0.3432	1.157	0.6474	0.0884	0.4316	0.5421	0.4654	1.1466	0.65	0.6188	0.3523	0.2431	0.1222	0.4277	0.6461
Valine		1.2792	0.8281	1.2454	0.7514	0.9113	1.4716	1.1349	1.404	1.2103	1.6679	1.1453	1.118	3.1746	2.8717	1.8239	1.4352	1.4235	1.6367	3.1824	1.3091	2.0228	2.1892	3.4671	4.4135	1.4534	1.7108	1.2688	0.6825	1.0166	2.2165	2.1944
Xanthine		0.2847	0.2041	0.3081	0.1859	0.1521	0.3523	0.3081	1.0218	0.3926	0.234	0.2249	0.2743	1.2662	0.8918	0.7631	0.7124	0.4901	1.4027	1.7212	0.8918	1.0543	0.9997	0.9529	2.5467	0.4875	0.9529	0.9165	0.7241	0.8372	0.6994	1.4378
Xanthosine		0	0	0	0	0	0	0	0	0	0	0	0	0.1053	0.0832	0	0	0	0	0	0	0	0	0	0.0715	0	0	0	0.0117	0	0.0325	0.0299
Xylose		3.8714	4.4499	3.1902	2.9913	3.185	4.4941	3.7271	2.4375	4.7528	3.6413	4.5591	3.705	3.7492	4.2276	2.08	1.2337	1.7966	1.404	1.3559	3.5672	0.9438	4.0118	3.4242	0.7475	2.5376	2.639	1.924	2.8639	0.975	2.6364	1.5431
cis-Aconitate	cis-Aconitate	0.2483	0.1625	0.1859	0.0949	0.1534	0.1391	0.1768	0	0.0468	0.1638	0.2431	0.1677	0	0.0962	0	0.1118	0.182	0.0338	0	0	0	0.1547	0.0858	0.1118	0.2301	0.1001	0.0715	0.0767	0.1677	0.0728	0.1131
citrate_ifr	Citrate	0.0949	0.0949	0.0962	0.0559	0.0559	0.1053	0.1443	0.0481	0.0741	0.0637	0.1027	0.1144	0.0819	0.0611	0.0715	0.0286	0.0884	0.0754	0.0442	0.0325	0.0338	0.0832	0.0416	0.078	0.0689	0.1378	0.0299	0.0221	0.0494	0.0897	0.0806
dCMP	Deoxycytidine Mono Pphosphate	0.7878	0.3874	0.7215	0	0.5694	1.1557	1.2402	0.8008	1.365	1.6198	1.0946	0	1.7875	2.0098	1.5054	2.1554	1.7121	4.069	0	0	0	2.236	0	0	1.625	1.326	2.0878	3.1746	1.8278	0	0.6877
galacturonate_ifr	Galacturonate	0.4771	0.195	0.4186	0.3042	0.4407	0.5707	0.195	0.728	0.3315	0.2509	0.2977	0.104	0.7371	0.8398	0.4914	0.507	0.5668	0.7358	1.131	1.5782	1.0998	0.7943	0.7306	1.3312	1.1011	0.5967	0.598	0.8879	0.3211	1.1635	0.7618
malic_ifr	Malate	0.3835	0.2132	0.1742	0.1443	0	0.3445	0.312	0.0832	0.2704	0.2132	0.2054	0.2262	0.0494	0.0936	0.2457	0.1768	0.1807	0.0598	0	0.13	0.1469	0.169	0.1014	0.0897	0.1755	0.2171	0.0884	0.4589	0.2769	0.1846	0.1625
β-Alanine		0.0663	0	0	0	0	0.1066	0.0325	0.0715	0.0663	0.0364	0	0	0	0.0221	0.0559	0.0715	0.0923	0.117	0.429	0.6071	0.039	0.0442	0.0585	0.1261	0.0767	0.0845	0.0416	0.2522	1.2051	0.0572	0.1066

## Sheet: raw
Profiled Data Type	Concentrations ( mM )
Export Date	Mon Nov 29 08:34:28 GMT 2021
	20211111-__flat_ex11_p1.cnx	20211111-__flat_ex20_p1.cnx	20211111-__flat_ex30_p1.cnx	20211111-__flat_ex40_p1.cnx	20211111-__flat_ex50_p1.cnx	20211111-__flat_ex60_p1.cnx	20211111-__flat_ex70_p1.cnx	20211111-__flat_ex80_p1.cnx	20211111-__flat_ex90_p1.cnx	20211111-__flat_ex100_p1.cnx	20211111-__flat_ex110_p1.cnx	20211111-__flat_ex120_p1.cnx	20211111-__flat_ex132_p1.cnx	20211111-__flat_ex142_p1.cnx	20211111-__flat_ex150_p1.cnx	20211111-__flat_ex160_p1.cnx	20211111-__flat_ex170_p1.cnx	20211111-__flat_ex180_p1.cnx	20211111-__flat_ex191_p1.cnx	20211111-__flat_ex202_p1.cnx	20211111-__flat_ex211_p1.cnx	20211111-__flat_ex220_p1.cnx	20211111-__flat_ex232_p1.cnx	20211111-__flat_ex241_p1.cnx	20211111-__flat_ex250_p1.cnx	20211111-__flat_ex261_p1.cnx	20211111-__flat_ex270_p1.cnx	20211111-__flat_ex280_p1.cnx	20211111-__flat_ex290_p1.cnx	20211111-__flat_ex302_p1.cnx	20211111-__flat_ex310_p1.cnx
20211111-__flat	11	20	30	40	50	60	70	80	90	100	110	120	130	140	150	160	170	180	190	200	210	220	230	240	250	260	270	280	290	300	310
Animals' identification number	1B	2B	3B	4B	5B	9B	10B	1R	2R	3R	4R	5R	9R	10R	11R	1N	2N	3N	4N	5N	6N	7N	8N	1V	2V	3V	4V	5V	6V	7V	8V
Treatment	DNBS + FMTCTR	DNBS + FMTCTR	DNBS + FMTCTR	DNBS + FMTCTR	DNBS + FMTCTR	DNBS + FMTCTR	DNBS + FMTCTR	DNBS + FMTDNBS	DNBS + FMTDNBS	DNBS + FMTDNBS	DNBS + FMTDNBS	DNBS + FMTDNBS	DNBS + FMTDNBS	DNBS + FMTDNBS	DNBS + FMTDNBS	abx + FMTCTR	abx + FMTCTR	abx + FMTCTR	abx + FMTCTR	abx + FMTCTR	abx + FMTCTR	abx + FMTCTR	abx + FMTCTR	abx + FMTDNBS	abx + FMTDNBS	abx + FMTDNBS	abx + FMTDNBS	abx + FMTDNBS	abx + FMTDNBS	abx + FMTDNBS	abx + FMTDNBS
FMT type	Therapeutic	Therapeutic	Therapeutic	Therapeutic	Therapeutic	Therapeutic	Therapeutic	Therapeutic	Therapeutic	Therapeutic	Therapeutic	Therapeutic	Therapeutic	Therapeutic	Therapeutic	patho	patho	patho	patho	patho	patho	patho	patho	patho	patho	patho	patho	patho	patho	patho	patho
1,3-Dihydroxyacetone	0.0044	0.0035	0.0032	0.0034	0.0033	0.0044	0.0032	0.0033	0.0026	0.0025	0.0027	0.0025	0.004	0.0032	0.0047	0.0049	0.0023	0.0025	0.0021	0.0024	0.0044	0.0034	0.0023	0.0012	0.0033	0.003	0.0053	0.0024	0.0012	0.0022	0.0039
2,3-Butanediol	0.0158	0.0019	0.0094	0.0027	0.0078	0.0051	0.0057	0.0052	0.0205	0.0028	0.0058	0.0052	0.0063	0.0028	0.0016	0.0073	0.0037	0.0026	0.0038	0.0033		0.008	0.0054	0.007	0.0034	0.0021	0.0027	0.0006	0.0017	0.0054	0.003
2-Aminobutyrate	0.0058	0.0054	0.0032	0.0052	0.0025	0.0044	0.0054	0.0092	0.0043	0.009	0.0018	0.0026	0.0028	0.0025	0.004	0.0097	0.0168	0.0083	0.0081	0.0052	0.0198	0.0076	0.0127	0.0063	0.0173	0.0168	0.0134	0.0074	0.0087	0.0192	0.0193
2-Hydroxyisovalerate	0.0013					0.0017	0.0014										0.0021			0.0024	0.0007	0.0015						0.0051	0.0019		0.0018
2-Oxoglutarate	0.0117	0.0106	0.0152	0.0026	0.0186	0.0126	0.0051	0.168	0.0477	0.0371	0.0086	0.0024	0.059	0.021	0.0601	0.0098	0.0081	0.0949	0.066	0.0352	0.0275	0.0098	0.0182	0.1613	0.0238	0.0135	0.0105	0.0135	0.0348	0.0169	0.0574
2-Oxoisocaproate	0.0189	0.0111	0.0162	0.0076	0.0188	0.0182	0.0081	0.0642	0.0352	0.0442	0.0113	0.006	0.0491	0.024	0.0489	0.0083	0.0129	0.0597	0.0337	0.015	0.0285	0.0168	0.0216	0.0524	0.0236	0.0184	0.0121	0.0068	0.0038	0.019	0.0306
2-methylbutyric_ifr	0.0102	0.0157	0.0089	0.0062	0.0041	0.0086	0.0064	0.0182	0.0098	0.0153	0.0088	0.0069	0.0119	0.0076	0.0164	0.0117	0.0105	0.0294	0.0212	0.002	0.0129	0.0095	0.0156	0.0459	0.0229	0.0104	0.0087	0.0114	0.0125	0.0134	0.0142
3-(3-Hydroxyphenyl)-3-hydroxypropanoic acid	0.0035	0.0021	0.0012	0.0019	0.0017	0.0029	0.0054	0.0007	0.0017		0.0031	0.0015	0.0017	0.0014	0.0018	0.0341	0.0308	0.0022	0.003	0.0149	0.0026	0.0021	0.0255	0.0059	0.0026	0.0005	0.0019	0.0465	0.0207	0.0014	0.0021
3-Hydroxybutyrate	0.0018		0.0022		0.0012		0.0015	0.0055	0.0535	0.0111	0.0132	0.0071	0.0582	0.0011	0.0046			0.0038	0.0052				0.0025	0.0232	0.0104	0.0066	0.0053	0.0034	0.006	0.0041	0.0039
3-Hydroxyphenylacetate	0.0169	0.0112	0.0059	0.0042	0.0057	0.0088	0.0189	0.0038	0.0048	0.0056	0.0153	0.0022	0.0039	0.0033	0.0058	0.0194	0.0173	0.0072	0.0066	0.0028	0.0057	0.0082	0.0224	0.004	0.0103	0.0047	0.0053		0.0146	0.0029	0.0043
3-Methyl-2-oxovalerate	0.0225	0.0115	0.0166	0.0059	0.0204	0.0161	0.0096	0.0688	0.0318	0.0409	0.0135	0.0057	0.0644	0.0295	0.0472	0.0111	0.0084	0.0713	0.0575	0.0138	0.0285	0.0203	0.0211	0.1578	0.0168	0.016	0.0125	0.0104	0.008	0.0227	0.0357
3-Phenylpropionate	0.0257	0.0147	0.0105	0.028	0.0184	0.0358	0.016	0.0385	0.0272	0.0274	0.0222	0.02	0.0335	0.0235	0.0327	0.018	0.0188	0.0266	0.0235	0.0109	0.0196	0.0323	0.0327	0.035	0.0167	0.0329	0.0245	0.0095	0.0168	0.0297	0.0263
4-Aminobutyrate	0.0034	0.0036	0.0021	0.0032	0.0019	0.0036	0.003	0.004	0.0022	0.0018	0.0044	0.0024	0.0015	0.0011	0.0063	0.0025	0.0025	0.0035	0.006	0.0133	0.0055	0.0023	0.003	0.0084	0.0045	0	0.0006	0.0101	0.002	0.0023	0.004
4-Hydroxyphenylacetate	0.0418	0.0166	0.0157	0.0062	0.0032	0.0234	0.017	0.0083	0.0066	0.0062	0.0152	0.0068	0.0036	0.0049	0.0033	0.0214	0.0268	0.0192	0.0322	0.0084	0.0297	0.0161	0.0466	0.0345	0.0365	0.0167	0.0073	0.0088	0.0071	0.0303	0.0129
5-Aminopentanoate	0.0093	0.0265	0.0041	0.0047	0.0061	0.0071	0.0109	0.0122	0.0085	0.0089	0.0049	0.0035	0.0061	0.0046	0.0143	0.0026	0.0056	0.0065	0.0152	0.037	0.0091	0.0035	0.0115	0.0183	0.0084	0.0056	0.0057	0.0451	0.0381	0.0075	0.0125
AMP	0.0077	0.0054	0.0078	0.0021	0.0046	0.0066	0.0056	0.0053	0.0082	0.0048	0.0039	0.0021	0.004		0.0028	0.0034	0.0039	0.0015				0.0025	0.019		0.0045		0.0036	0.0098	0.0006	0.0013
Acetate	2.024	2.477	2.3119	3.9864	3.3796	2.85	2.3816	3.4103	3.6216	3.2165	3.1717	2.7931	4.0583	3.6787	3.9434	2.5901	2.0172	2.54	1.6658	2.5392	1.956	2.3889	1.683	2.2542	1.5724	2.4401	2.2041	2.8535	1.488	1.5761	2.434
Acetoacetate	0.0083	0.0075	0.0111	0.0088	0.0101	0.0058	0.0051	0.026	0.0548	0.0108	0.0191	0.0127	0.0698	0.0049	0.0056	0.0056	0.0031	0.0058	0.0125	0.0019	0.0046	0.0034	0.0089	0.0071		0.0066	0.0033	0.002	0.0021	0.0054	0.0097
Acetoin	0.0048	0.0015	0.0036	0.0019	0.0032	0.0042	0.0041	0.0047	0.0033	0.0016	0.0032	0.0023	0.0099	0.0018	0.0067	0.0048	0.004	0.0289	0.0054	0.0026	0.0056	0.0033	0.0292	0.0117	0.0382	0.0301	0.0184	0.0183	0.0005	0.0195	0.0064
Adenosine	0.0023	0.0006	0.001	0.0012	0.0016	0.001	0.0019	0.0015	0.0007	0.0064	0.0032	0.0018	0.0046	0.0036	0.0058	0.0034	0.0051	0.0046	0.0076	0.0035	0.0035	0.0054	0.0037	0.001	0.0025	0.0028	0.0021	0.0038	0.003	0.0018	0.0043
Alanine	0.0357	0.0342	0.0276	0.0447	0.0251	0.0273	0.037	0.0274	0.0246	0.0359	0.0276	0.039	0.0099	0.0184	0.0234	0.0319	0.0519	0.0218	0.0152	0.0382	0.0192	0.036	0.0239	0.0284	0.0262	0.0207	0.0218	0.0514	0.0607	0.0134	0.0174
Alpha-ketoisovaleric acid	0.0136	0.0072	0.0098	0.0046	0.0106	0.0101	0.0044	0.0319	0.0163	0.022	0.0066	0.0046	0.0315	0.0142	0.0223	0.0076	0.007	0.0345	0.0332	0.0058	0.0144	0.011	0.0112	0.0771	0.0166	0.0112	0.0081	0.0028	0.0053	0.0124	0.0201
Arabinose	0.0507	0.0911	0.0373	0.0548	0.0754	0.0733	0.0614	0.0472	0.0358	0.0597	0.0866	0.0845	0.0602	0.0661	0.0389	0.0245	0.032	0.0156	0.008	0.0472	0.0113	0.0498	0.0266	0.0133	0.0278	0.0417	0.0428	0.0925	0.0283	0.0191	0.0197
Asparagine	0.0229	0.0327	0.0379	0.0311	0.0166	0.0131	0.0201	0.0319	0.0111	0.0472	0.0412	0.0327	0.016	0.0495	0.0214	0.0417	0.055	0.0452	0.0196		0.0129	0.073	0.013	0.0167	0.0417	0.0425	0.0337	0.0119	0.0085	0.0227	0.014
Aspartate	0.0502	0.02	0.0342	0.0133	0.0203	0.0273	0.0273	0.015	0.0393	0.0139	0.0239	0.0191	0.0106	0.0095	0.0275	0.0309	0.0368	0.0142	0.0163	0.028	0.0419	0.0482	0.0297	0.0247	0.0326	0.0335	0.0252	0.0309	0.049	0.0199	0.0236
Betaine	0.0036	0.004	0.0015	0.0027	0.0016	0.0035	0.0041	0.005	0.0054	0.0059	0.0028	0.0001	0.0054	0.0064	0.0069	0.0026	0.0035	0.0031	0.0067	0.0022	0.0042	0.0057	0.0058	0.0074	0.0031	0.0049	0.0022	0.0016	0.0026	0.0045	0.0034
Butyrate	0.4758	0.6546	0.4179	1.2367	0.7199	0.6398	0.4901	1.5323	0.7254	1.2465	0.7025	0.7969	1.3246	1.3646	1.4735	0.4259	0.4311	1.5528	0.7837	0.0975	0.3096	0.4687	0.3102	1.024	0.6116	0.5959	0.4856	0.445	0.2933	0.3092	0.571
Caproic acid	0.0524	0.0122	0.0288	0.0159	0.0203	0.0285	0.0089	0.0216	0.0145	0.041	0.0312	0.0167	0.0592	0.0311	0.0898	0.0463	0.0158	0.0109	0.0241		0.0273	0.0112	0.0175	0.1011	0.0087	0.0074	0.0111	0.0046	0.0069	0.0097	0.0042
Caprylate	0.0089	0.0097	0.0147	0.0107	0.0078	0.0167	0.0137	0.0249	0.0169	0.0258	0.0169	0.0082	0.0097	0.011	0.0173	0.0141	0.0136	0.018	0.014	0.0027	0.01	0.0136	0.0147	0.0227	0.0166	0.0066	0.0088	0.0039	0.0048	0.0098	0.0061
Choline	0.0066	0.0038	0.0057	0.0076	0.0044	0.0066	0.0059	0.008	0.0055	0.0043	0.0053	0.0031	0.0069	0.004	0.0039	0.0043	0.0034	0.0027	0.0037	0.0047	0.0049	0.0041	0.0044	0.0039	0.0034	0.0025	0.0026	0.0014	0.0031	0.0026	0.0053
Citrulline	0.0983	0.0157	0.0411	0.0051	0.0245	0.0444	0.0367	0.0842	0.0606	0.1207	0.0519	0.0384	0.0848	0.0687	0.0754	0.0516	0.0901	0.0945	0.1025	0.03	0.0774	0.066	0.1098	0.1694	0.0622	0.0681	0.0422		0.0212	0.0553	0.1029
Creatine	0.0036	0.0026	0.0119	0.0012	0.004	0.0068	0.0098	0.0051	0.0031	0.0091	0.0082	0.002	0.0082	0.0066	0.0115	0.0038	0.0051	0.0056	0.0101	0.0532	0.0098	0.0055	0.0107	0.0159	0.0046	0.01	0.0037	0.0415	0.0047	0.0068	0.0026
Cytidine	0.0025	0.0014	0.0013					0.0057		0.0086			0.0054		0.0041			0.0084					0.0264		0.0024		0.0068		0.0032		0.0044
Cytidine monophosphate	0.0282	0.0276	0.0333	0.0104	0.0202	0.037	0.0387	0.0393	0.0517	0.0214	0.0244	0.0202	0.0121		0.049	0.0439	0.04	0.0393				0.0522			0.0384		0.0485	0.056	0.0452		0.0107
Desaminotyrosine	0.0166																	0.0363							0.017	0.0183	0.0184	0.008		0.0122
Dimethylamine	0.0009	0.0016	0.0012	0.0013	0.0012	0.0022	0.0005	0.0016	0.0014	0.0007	0.0004	0.0058	0.0015	0.0003	0.0012	0.0015	0.0014	0.0011	0.0008	0.0012	0.0006	0.0012	0.0009	0.0013	0.0008	0.0004	0.0009	0.0018	0.0007	0.0008	0.001
Ethanol	0.0193	0.0206	0.0241	0.0287	0.0335	0.0304	0.0496	0.0124	0.0177	0.0186	0.0329	0.0228	0.015	0.0184	0.0075	0.0326	0.0343	0.0085	0.0127	0.0278	0.0119	0.0358	0.014	0.0123	0.0179	0.0241	0.0206	0.0479	0.0283	0.024	0.0088
Formate	0.0093	0.0039	0.0058	0.004	0.0044	0.0053	0.0085	0.0087	0.0087	0.0041	0.0047	0.005	0.0166	0.0137	0.0075	0.0067	0.007	0.0092	0.0171	0.0087	0.0155	0.0136	0.0209	0.0178	0.0062	0.0105	0.0061	0.004	0.0074	0.0146	0.0081
Fucose	0.0126	0.017	0.0187	0.0159	0.018	0.0221	0.0165	0.0134	0.0168	0.0221	0.0218	0.0276	0.0195	0.0211	0.0162	0.0216	0.0166	0.0224	0.0283	0.0189	0.0263	0.0411	0.0243	0.0353	0.0259	0.0226	0.018	0.0238	0.0247	0.0211	0.0125
Fumarate	0.0069	0.0035	0.0057	0.0019	0.0032	0.0065	0.0082		0.0028	0.0024	0.0039	0.0035	0.0024	0.0028	0.0017	0.0045	0.0038	0.001	0.0015	0.0034	0.0051	0.0054	0.0081	0.001	0.0039	0.0038	0.0027	0.0108	0.0042	0.0039	0.002
GTP	0.0134	0.0227	0.0039	0.0128	0.0154	0.0285	0.0264	0.0213	0.0285	0.0182	0.0223	0.015	0.0102	0.0098	0.0206	0.0197	0.0142	0.0089	0.0071			0.0183	0.067	0.0026	0.0261	0.0091	0.0158	0.0228	0.016	0.0019	0.013
Galactose	0.0464	0.0235	0.0498	0.03	0.0291	0.0367	0.0324	0.0447	0.0416	0.0293	0.0478	0.035	0.0699	0.0567	0.0453	0.0364	0.0304	0.0343	0.0745	0.0638	0.0543	0.0875	0.0871	0.0585	0.038	0.0461	0.0486	0.0669	0.0618	0.0534	0.0228
Glucose	0.4833	0.3804	0.346	0.4945	0.4857	0.6207	0.5738	0.8342	0.4007	0.7221	0.6816	0.5965	0.979	0.7242	0.8683	0.2379	0.2172	0.3053	0.1679	0.5077	0.1723	0.3875	0.3955	0.1561	0.434	0.5181	0.6931	0.629	0.4349	0.323	0.4202
Glucose-1-phosphate		0.0258	0.0092	0.0367	0.0119		0.0084		0.0078	0.0549	0.0109	0.0366						0.0097
Glutamate	0.2718	0.1541	0.2731	0.1054	0.1875	0.2218	0.1815	0.4696	0.3443	0.3596	0.2364	0.1526	0.4425	0.393	0.4507	0.291	0.2215	0.4383	0.6108	0.478	0.4431	0.3283	0.4727	0.9937	0.2628	0.3722	0.3005	0.3939	0.318	0.2966	0.5572
Glutamine	0.0739	0.0373	0.054	0.0377	0.0448	0.0417	0.043	0.0627	0.0434	0.0834	0.0482	0.0384	0.0545	0.0757	0.0547	0.0569	0.0481	0.0536	0.0805	0.0635	0.052	0.0702	0.2237	0.0447	0.0448	0.0587	0.0239	0.0326	0.0475	0.0546	0.049
Glutarate	0.0154	0.0063	0.0104	0.0091	0.0032	0.0118	0.0079	0.009	0.007	0.0129	0.0104	0.0028	0.0049	0.009	0.0093	0.0098	0.0148	0.0145	0.0197	0.0064	0.011	0.0076	0.0165	0.0151	0.0149	0.0101	0.0181	0.031	0.0058	0.0095	0.0114
Glycerol	0.0963	0.0389	0.119	0.0607	0.0968	0.1137	0.0584	0.1143	0.0713	0.0904	0.1207	0.0454	0.0938	0.1088	0.1018	0.0754	0.0751	0.0732	0.0717	0.0292	0.0674	0.0871	0.0425	0.0633	0.0931	0.0722	0.0774	0.0262	0.0292	0.0767	0.1085
Glycine	0.0792	0.0527	0.06	0.0524	0.0449	0.0571	0.0655	0.0666	0.0595	0.0698	0.0846	0.0666	0.0696	0.0938	0.0588	0.0795	0.0841	0.0745	0.1347	0.0902	0.0724	0.1125	0.1565	0.0953	0.0547	0.0956	0.0701	0.0606	0.1072	0.0737	0.052
Histidine	0.0121	0.0124	0.0121	0.014	0.0066	0.0073	0.0112	0.0185	0.0143	0.0065	0.012	0.0176	0.0033	0.0062	0.0087	0.0121	0.0067	0.0085	0.0119	0.013	0.0069	0.0122	0.0147	0.0053	0.0088	0.01	0.0065	0.0201	0.0155	0.0028	0.008
Hypoxanthine	0.0333	0.0167	0.0285	0.0137	0.0218	0.0312	0.0227	0.0992	0.0431	0.0464	0.0288	0.0232	0.0909	0.0555	0.0673	0.0455	0.0339	0.0855	0.0853	0.047	0.0637	0.0458	0.0539	0.1504	0.0419	0.0522	0.0561	0.0548	0.0423	0.0505	0.094
IMP	0.0052	0.0033	0.0035	0.0004	0.0026	0.005	0.0039	0.0025	0.0077	0.0054	0.0038		0.0028		0.0043	0.0071	0.0058	0.0073	0.005			0.0069	0.0029	0.0061	0.0057	0.0012	0.0055	0.0096	0.005		0.0014
Isobutyrate	0.0279	0.0382	0.0257	0.0233	0.0211	0.0304	0.0222	0.0311	0.037	0.0196	0.0347	0.0263	0.0218	0.0174	0.0347	0.0258	0.0145	0.0396	0.0321	0.0347	0.031	0.0126	0.0954	0.0899	0.0278	0.101	0.0246	0.0289	0.0201	0.0203	0.0279
Isoleucine	0.1068	0.0414	0.0743	0.0529	0.0496	0.0679	0.0668	0.0895	0.0945	0.1153	0.0985	0.0683	0.1683	0.1855	0.116	0.0958	0.1074	0.1008	0.1976	0.0727	0.1038	0.1447	0.2063	0.3016	0.0776	0.1315	0.0836	0.0288	0.0531	0.1349	0.1304
Isovalerate	0.0296	0.0199	0.0249	0.0175	0.0134	0.0213	0.0302	0.0317	0.0168	0.0151	0.0245	0.0233	0.0294	0.012	0.0246	0.0263	0.0125	0.0491	0.0374	0.0039	0.021	0.0149	0.0191	0.0939	0.0265	0.016	0.0109	0.0063	0.0159	0.0244	0.0223
Lactate	0.1772	0.0429	0.0499	0.0725	0.0516	0.0686	0.1301	0.0194	0.0257	0.0311	0.0913	0.0529	0.0412	0.0607	0.0293	0.1464	0.1952	0.0435	0.0428	0.0417	0.0543	0.1624	0.0291	0.0364	0.0369	0.0419	0.0212	0.019	0.0295	0.0406	0.0258
Leucine	0.1629	0.1029	0.1028	0.0886	0.0919	0.0986	0.1135	0.1357	0.1242	0.1654	0.1341	0.1319	0.1867	0.1987	0.1511	0.1331	0.1687	0.1319	0.2057	0.0916	0.1464	0.1844	0.2488	0.3028	0.1256	0.1618	0.1344	0.0805	0.0932	0.1667	0.1685
Lysine	0.1279	0.0796	0.0966	0.0795	0.0897	0.1075	0.1087	0.1641	0.1163	0.1492	0.1057	0.089	0.1626	0.1525	0.1354	0.1045	0.102	0.1362	0.1895	0.0866	0.1202	0.13	0.1528	0.2806	0.119	0.1114	0.1037	0.0713	0.0921	0.1164	0.1726
Malonate	0.0057	0.0062	0.0092	0.0051	0.0074	0.0104	0.006	0.038	0.0115	0.0174	0.017	0.0026	0.0124	0.0186	0.0196	0.0109	0.0081	0.0117	0.0135	0.0311	0.0032	0.0089	0.0251	0.0165	0.0131	0.008	0.0116	0.0635	0.0581	0.0094	0.0138
Methanol	0.0544	0.0244	0.0401	0.0412	0.0355	0.0339	0.0385	0.0138	0.0124	0.036	0.0471	0.0334	0.025	0.0432	0.0181	0.033	0.0293	0.0195	0.0185	0.0352	0.0242	0.0419	0.0285	0.0173	0.0431	0.0271	0.0296	0.0361	0.0269	0.0278	0.0296
Methionine	0.0516	0.0271	0.0484	0.0266	0.034	0.0463	0.038	0.0914	0.0706	0.0777	0.0402	0.0322	0.063	0.0734	0.0755	0.0454	0.0292	0.071	0.0768	0.0248	0.0545	0.0566	0.0659	0.0756	0.048	0.0525	0.0447	0.02	0.0281	0.0448	0.0856
Methylamine	0.0035	0.0061	0.0034	0.01	0.0061	0.0056	0.0104	0.011	0.0199	0.0066	0.0091	0.0185	0.0106	0.0107	0.0066	0.0051	0.0116	0.0071	0.005	0.0252	0.0037	0.0066	0.0181	0.0172	0.0081	0.0064	0.0037	0.001	0.0021	0.0057	0.0081
N-Acetylglucosamine	0.0166	0.0185	0.0279	0.0168	0.0176	0.0309	0.0206	0.0306	0.0199	0.0299	0.0215	0.0244	0.0476	0.0386	0.0222	0.0516	0.0255	0.0328	0.0442		0.064	0.0431	0.0667	0.056	0.0224	0.0254	0.0306	0.0056	0.0111	0.0602	0.0106
Nicotinate	0.0106	0.0073	0.01	0.0058	0.0096	0.0095	0.0078	0.0401	0.0169	0.0159	0.0079	0.0067	0.0182	0.0118	0.0243	0.0096	0.0055	0.021	0.0152	0.0221	0.0104	0.0116	0.012	0.0227	0.0126	0.0123	0.0131	0.0232	0.0129	0.0059	0.0249
Ornithine	0.0207	0.0022	0.0125	0.0057	0.0117	0.0104	0.0138	0.0099	0.0181	0.0082	0.0099	0.0055	0.0211	0.0154	0.0061	0.0164	0.0142	0.0196	0.0115	0.0138	0.0174	0.0199	0.0099	0.0364	0.0116	0.009	0.0049	0.0102	0.0128	0.0124	0.0119
Phenylacetate	0.0162	0.0085	0.0114	0.0053	0.0068	0.014	0.0187	0.0154	0.0124	0.0105	0.012	0.0068	0.0087	0.0089	0.0095	0.0184	0.0127	0.0228	0.0209	0.0272	0.0122	0.021	0.0239	0.0254	0.0159	0.0175	0.012	0.0302	0.0118	0.0109	0.0221
Phenylalanine	0.0704	0.0405	0.059	0.0485	0.0453	0.0637	0.0604	0.0912	0.0669	0.0899	0.0652	0.0566	0.1052	0.1036	0.0861	0.0645	0.0717	0.0778	0.1224	0.0475	0.0677	0.0891	0.1205	0.1891	0.0505	0.0801	0.0607	0.0365	0.0421	0.0764	0.0863
Proline	0.0553	0.0417	0.0493	0.025	0.0247	0.0477	0.0512	0.0863	0.047	0.0397	0.0512	0.0336	0.1072	0.1054	0.1015	0.0552	0.0435	0.0618	0.1312	0.0881	0.0968	0.0557	0.1011	0.1785	0.0403	0.0481	0.0611	0.0558	0.0398	0.0718	0.0802
Propionate	0.3481	0.355	0.4143	0.3871	0.33	0.3807	0.4466	0.5326	0.4367	0.3542	0.5139	0.4013	0.5392	0.3596	0.5188	0.4491	0.2667	0.552	0.2137	0.5971	0.3065	0.2984	0.3261	0.5206	0.31	0.3726	0.3779	1.0041	0.2819	0.3596	0.3837
Propylene glycol	0.0031	0.0025	0.0039	0.0013	0.0008	0.0009	0.0019	0.0015	0.004	0.0015	0.002		0.0032	0.0007	0.0007	0.0023	0.001			0.0009	0.002	0.0021	0.0021		0.0014	0.001	0.001	0.0006	0.0002	0.0021	0.0017
Putrescine	0.0018	0.0048	0.0017	0.0018	0.0026	0.0044	0.0076	0.0023	0.0018	0.006	0.0045	0.0066	0.0046	0.0016	0.0049	0.0044	0.0034	0.0034	0.005	0.0059	0.0086	0.0032	0.008	0.0042	0.0058	0.0053	0.0068		0.01	0.0044	0.0041
Pyruvate	0.1257	0.0727	0.1154	0.0718	0.068	0.1167	0.1078	0.1555	0.1234	0.1763	0.1184	0.0858	0.1144	0.1391	0.1494	0.132	0.1406	0.0893	0.1375	0.0767	0.1406	0.1781	0.2062	0.0793	0.1444	0.1606	0.1129	0.0911	0.0974	0.1452	0.1653
Ribose	0.0835	0.042	0.0478	0.0124	0.0583	0.1563	0.071	0.3588	0.0747	0.1026	0.0665	0.0537	0.3063	0.1726	0.1955	0.1675	0.1287	0.2644	0.5906	0.2549	0.2982	0.1905	0.3001	0.7206	0.1333	0.2158	0.2054	0.1701	0.1937	0.2803	0.3175
Serine	0.0713	0.0402	0.0513	0.0408	0.0304	0.0347	0.0412	0.1443	0.0359	0.0817	0.0536	0.046	0.0295	0.0406	0.0295	0.0591	0.0876	0.0271	0.0488	0.0575	0.0467	0.0781	0.0805	0.0507	0.0594	0.0473	0.0427	0.0644	0.05	0.0272	0.0427
Succinate	0.1506	0.0692	0.1274	0.0156	0.0397	0.2756	0.2068	0.0202	0.0125	0.0475	0.1908	0.0441	0.0159	0.0602	0.0113	0.0142	0.1426	0.0087	0.0052	0.0066	0.0128	0.0186	0.044	0.0121	0.0178	0.0864	0.0095	0.0312	0.003	0.0237	0.0066
Sucrose	0.0098		0.0061	0.0088	0.0062	0.0031	0.0072	0.0078		0.006	0.0023				0.02	0.0013		0.0042							0.0034		0.0019	0.0093			0.0069
Threonine	0.0625	0.0505	0.0891	0.0566	0.0428	0.0848	0.0483	0.1122	0.0936	0.106	0.0885	0.0408	0.1536	0.1634	0.0992	0.0887	0.091	0.1427	0.2027	0.0827	0.1175	0.1188	0.1649	0.2008	0.0584	0.1176	0.0719	0.0897	0.0713	0.1152	0.1075
Tryptophan	0.0102	0.0067	0.0104	0.0095	0.0062	0.0063	0.008		0.0103	0.0226	0.0118	0.0099	0.0135	0.0141	0.0066	0.0076	0.0066	0.0078	0.0103	0.0072	0.0081	0.012	0.0165	0.0114	0.007	0.0101	0.0102	0.0044	0.0083	0.0071	0.0081
Tyramine	0.0015				0.0031		0.007									0.0008	0.0033						0.0345		0.0231	0.0234	0.0083	0.0225		0.0193
Tyrosine	0.0638	0.0485	0.0534	0.0445	0.0468	0.0575	0.0514	0.1121	0.0662	0.1078	0.064	0.0575	0.0935	0.0913	0.0849	0.071	0.0701	0.0816	0.1082	0.0476	0.065	0.0917	0.1011	0.1712	0.0506	0.0696	0.062	0.0309	0.0355	0.0693	0.098
UDP-glucose	0.0108	0.0108	0.0085	0.008	0.0114	0.014	0.0124	0.0164	0.0092	0.0166	0.0145	0.0112	0.0062	0.0114	0.0224	0.0084	0.0118	0.0126		0.0049		0.0082	0.0043		0.0122	0.013	0.0115		0.0108	0.008	0.0185
UMP	0.016	0.0121	0.0117	0.0069	0.0109	0.0155	0.0124	0.0152	0.0191	0.0054	0.0177	0.0063	0.0045	0.0017	0.0195	0.0092	0.015	0.0123				0.0183	0.0025		0.0137	0.0035	0.015	0.0234	0.0077	0.0013
Uracil	0.0625	0.0279	0.0426	0.0269	0.0245	0.0654	0.051	0.1005	0.0436	0.0433	0.0381	0.0193	0.1579	0.1129	0.106	0.0731	0.0647	0.1641	0.263	0.1162	0.1365	0.0759	0.1408	0.3771	0.0832	0.1264	0.0778	0.0891	0.1208	0.1187	0.1654
Uridine	0.0041	0.0018	0.0026	0.0026	0.0025	0.0073	0.0049	0.0044	0.0038	0.0057	0.0065	0.0028	0.0068	0.006	0.0052	0.0046	0.0072	0.0069	0.0023	0.0014	0.0029	0.0023		0.0026	0.0016	0.0018	0.005	0.0065	0.0025	0.0018	0.0043
Urocanate	0.0063	0.006	0.0028	0.0043	0.0057	0.0046	0.0067	0.0064	0.0081	0.009	0.0062	0.0065	0.0038	0.0062	0.0043	0.0029	0.0053	0.0061	0.0035	0.0097	0.0013	0.0108	0.0041	0.0023	0.0061	0.0041	0.003	0.0102		0.0014	0.0044
Valerate	0.0377	0.0293	0.0317	0.0563	0.0308	0.0407	0.0369	0.089	0.0466	0.0805	0.0407	0.0366	0.0722	0.0381	0.0815	0.0334	0.0264	0.089	0.0498	0.0068	0.0332	0.0417	0.0358	0.0882	0.05	0.0476	0.0271	0.0187	0.0094	0.0329	0.0497
Valine	0.0984	0.0637	0.0958	0.0578	0.0701	0.1132	0.0873	0.108	0.0931	0.1283	0.0881	0.086	0.2442	0.2209	0.1403	0.1104	0.1095	0.1259	0.2448	0.1007	0.1556	0.1684	0.2667	0.3395	0.1118	0.1316	0.0976	0.0525	0.0782	0.1705	0.1688
Xanthine	0.0219	0.0157	0.0237	0.0143	0.0117	0.0271	0.0237	0.0786	0.0302	0.018	0.0173	0.0211	0.0974	0.0686	0.0587	0.0548	0.0377	0.1079	0.1324	0.0686	0.0811	0.0769	0.0733	0.1959	0.0375	0.0733	0.0705	0.0557	0.0644	0.0538	0.1106
Xanthosine													0.0081	0.0064										0.0055				0.0009		0.0025	0.0023
Xylose	0.2978	0.3423	0.2454	0.2301	0.245	0.3457	0.2867	0.1875	0.3656	0.2801	0.3507	0.285	0.2884	0.3252	0.16	0.0949	0.1382	0.108	0.1043	0.2744	0.0726	0.3086	0.2634	0.0575	0.1952	0.203	0.148	0.2203	0.075	0.2028	0.1187
cis-Aconitate	0.0191	0.0125	0.0143	0.0073	0.0118	0.0107	0.0136		0.0036	0.0126	0.0187	0.0129		0.0074		0.0086	0.014	0.0026				0.0119	0.0066	0.0086	0.0177	0.0077	0.0055	0.0059	0.0129	0.0056	0.0087
citrate_ifr	0.0073	0.0073	0.0074	0.0043	0.0043	0.0081	0.0111	0.0037	0.0057	0.0049	0.0079	0.0088	0.0063	0.0047	0.0055	0.0022	0.0068	0.0058	0.0034	0.0025	0.0026	0.0064	0.0032	0.006	0.0053	0.0106	0.0023	0.0017	0.0038	0.0069	0.0062
dCMP	0.0606	0.0298	0.0555		0.0438	0.0889	0.0954	0.0616	0.105	0.1246	0.0842		0.1375	0.1546	0.1158	0.1658	0.1317	0.313				0.172			0.125	0.102	0.1606	0.2442	0.1406		0.0529
galacturonate_ifr	0.0367	0.015	0.0322	0.0234	0.0339	0.0439	0.015	0.056	0.0255	0.0193	0.0229	0.008	0.0567	0.0646	0.0378	0.039	0.0436	0.0566	0.087	0.1214	0.0846	0.0611	0.0562	0.1024	0.0847	0.0459	0.046	0.0683	0.0247	0.0895	0.0586
malic_ifr	0.0295	0.0164	0.0134	0.0111		0.0265	0.024	0.0064	0.0208	0.0164	0.0158	0.0174	0.0038	0.0072	0.0189	0.0136	0.0139	0.0046		0.01	0.0113	0.013	0.0078	0.0069	0.0135	0.0167	0.0068	0.0353	0.0213	0.0142	0.0125
β-Alanine	0.0051					0.0082	0.0025	0.0055	0.0051	0.0028				0.0017	0.0043	0.0055	0.0071	0.009	0.033	0.0467	0.003	0.0034	0.0045	0.0097	0.0059	0.0065	0.0032	0.0194	0.0927	0.0044	0.0082

## Sheet: sample list
	Disease Protocol				Therapy Protocol
20211111-vauzour_flat	Animals' identification number	Treatment	Day 32	20211111-vauzour_flat	Animals' identification number	Treatment	Day 42
160	1N	abx + FMTCTR	+	11	1B	DNBS + FMTCTR	+
170	2N	abx + FMTCTR	+	20	2B	DNBS + FMTCTR	+
180	3N	abx + FMTCTR	+	30	3B	DNBS + FMTCTR	+
190	4N	abx + FMTCTR	+	40	4B	DNBS + FMTCTR	+
200	5N	abx + FMTCTR	+	50	5B	DNBS + FMTCTR	+
210	6N	abx + FMTCTR	+	60	9B	DNBS + FMTCTR	+
220	7N	abx + FMTCTR	+	70	10B	DNBS + FMTCTR	+
230	8N	abx + FMTCTR	+
240	1V	abx + FMTDNBS	+	80	1R	DNBS + FMTDNBS	+
250	2V	abx + FMTDNBS	+	90	2R	DNBS + FMTDNBS	+
260	3V	abx + FMTDNBS	+	100	3R	DNBS + FMTDNBS	+
270	4V	abx + FMTDNBS	+	110	4R	DNBS + FMTDNBS	+
280	5V	abx + FMTDNBS	+	120	5R	DNBS + FMTDNBS	+
290	6V	abx + FMTDNBS	+	130	9R	DNBS + FMTDNBS	+
300	7V	abx + FMTDNBS	+	140	10R	DNBS + FMTDNBS	+
310	8V	abx + FMTDNBS	+	150	11R	DNBS + FMTDNBS	+
