# Supplementary material for: Microbiome and gut as partners in the persistence of post-inflammatory visceral pain: insight into working mechanisms of faecal transplant for therapy advance
Source: Research Square preprint supplement (doi:10.21203/rs.3.rs-6025304/v1), 2025-10-20
Supplement: Supplementary file 4 [file 3a1bb02dbb067fe262a971ef.xlsx]

## Sheet: Body Weight
		Body weight (g)
Treatment	Animal	Day 0	Day 2	Day 4	Day 7	Day 9	Day 11	Day 14	Day 18	Day 21	Day 23	Day 25	Day 29	Day 32	Day 35	Day 42
DNBS + FMTCTR	1B	312	287	281	299	250	312	322	324	330	332	336	345	341	346	360
	2B	322	290	285	311	309	316	324	330	332	337	339	348	354	357	371
	3B	338	315	290	267	298	302	315	331	349	354	366	371	358	381	399
	4B	314	294	292	290	291	302	315	323	332	337	344	350	336	360	380
	5B	313	285	279	305	310	318	322	332	322	336	342	348	356	364	373
	9B	332	313	305	330	337	340	349	342	345	350	360	373	381	373	378
	10B	322	300	292	316	318	329	338	347	328	337	355	362	364	363	375
	11B	319	300	292	303	309	Died
DNBS + FMTDNBS	1R	337	320	300	320	328	334	348	369	378	386	392	395	405	409	428
	2R	315	287	281	299	309	316	326	339	348	351	357	365	372	369	394
	3R	299	284	274	284	287	295	305	314	318	321	333	333	337	338	355
	4R	318	318	318	329	323	330	332	333	337	344	348	350	352	339	369
	5R	300	274	255	283	284	292	306	323	330	337	347	353	356	362	377
	9R	318	283	275	272	270	248	271	310	322	334	341	354	360	363	386
	10R	294	272	263	280	274	278	292	308	316	321	332	336	335	338	351
	11R	323	298	292	291	305	312	380	333	344	338	346	357	359	365	387
DNBS + veh	7B	319	297	279	304	288	315	323	323	336	345	355	361	363	405	378
	8B	315	288	279	257	269	287	305	324	335	344	371	364	368	406	390
	7R	314	290	293	312	317	319	327	339	344	355	359	368	372	405	397
	8R	326	310	298	320	321	332	343	362	367	380	388	392	395	406	384
	6R	317	292	282	277	Died
	6B	330	299	300	291	295	301	318	Died
veh + veh	5V	325	325	331	336	337	339	340	345	349	336	344	354	356	368	391
	6V	335	335	343	357	360	358	363	369	371	370	373	378	377	386	408
	7V	328	328	337	340	343	341	346	331	342	348	351	367	370	380	403
	8V	335	335	341	353	360	358	366	350	360	360	364	373	373	384	406

## Sheet: Behavioural Tests
		Visceral pain - AWR in response to CRD																														Somatic pain
		Day 7					Day 14					Day 21					Day 28					Day 35					Day 42					HOT PLATE (48°C)	HOT PLATE (50°C)	PAW PRESSURE
Treatment	Animal	0.5 ml	1 ml	2 ml	3 ml		0.5 ml	1 ml	2 ml	3 ml		0.5 ml	1 ml	2 ml	3 ml		0.5 ml	1 ml	2 ml	3 ml		0.5 ml	1 ml	2 ml	3 ml		0.5 ml	1 ml	2 ml	3 ml		Licking latency (s)	Licking latency (s)	Paw withdrawal threshold (g)
DNBS + FMTCTR	1B	0.5	1	2	2.5		0.5	1	2.5	3.5		0	1	2.5	3.5		0	1	2.5	3.5		0	2	3	3		0	0.5	1.5	2.5		20	18	75
	2B	0.5	1	2.5	3		0	0.5	2.5	4		0	1	2.5	3		0.5	1.5	2.5	3		0	0.5	1.5	2		0	0	1.5	2.5		21	16.5	72.5
	3B	1	2	3	4		0	1	2.5	3.5		0.5	1.5	2	3		0	0	1.5	2		0	0	2	3		0	0	1.5	2.5		32	18.5	70
	4B	1.5	2.5	3.5	4		0	0	1.5	2.5		0	0.5	2	3		0	1	2	2.5		0	0	2	3.5		0	0.5	2	3		33	24	65
	5B	0.5	1	3	4		0.5	1	2	3		1	2	3	4		1	1.5	2.5	3.5		0.5	1.5	2.25	3		0	0	2	3		32	19	67.5
	9B	1	1.5	2	4		0	1.5	2.5	4		0	0	2	3		0	1	1.5	2.5		0	0	1.25	2.5		0.5	1	2	2.5		23	20	72.5
	10B	0.5	1	2	3		0	0.5	1.5	3		0	0.5	2.5	4		0	0.5	1.5	2.5		0	0	0.5	1.5		0	0.5	1.5	2.5		21	15	72.5
	11B	0	2	3	4		Died
DNBS + FMTDNBS	1R	0.75	2	2.5	4		0	1	2	4		0	1	2.5	3.5		0.5	1.5	3	3.5		0	1.5	2.5	3.5		0	0.5	1.5	2.5		19	7.5	52.5
	2R	0	2	3	4		0.5	1	2.5	3.5		0.5	1.5	3	4		0.5	1	2	3		0.5	1.5	2.5	3		0.5	2	3	4		17	13	57.5
	3R	0.5	1	2.5	4		1	2	3	3.5		1	2	2.5	3.5		1	2	3	4		0	1.5	2	3		0.5	1.5	3	4		21	14.5	55
	4R	0	1.5	2.5	3		0.5	1	2.5	3		0	1.5	2.5	3.5		0.5	1	2.5	3.5		0.5	1.5	3	3.5		0	0.5	2	2.5		17	14	52.5
	5R	0.5	2	2.5	4		0	2	3	4		0	1.5	3	4		0	1	2.5	3		0	1	2	3.5		0.5	1.5	2.5	3.5		18	15.5	50
	9R	Bleeding					1	2	3	4		0.5	1.5	3	4		0.5	1	2.5	3		0.5	1	2.5	3.5		0.5	1	2	2.5		21	15	52.5
	10R	0.5	2	3	4		1	2	3	4		0.5	1.5	3	4		1	2	2.5	3.5		0	1	2.5	3.5		0	0.5	2.5	3.5		13	10.5	50
	11R	1	2	3.5	4		0.5	1.5	2.5	3		0.5	1	2	3		0.5	1	2	3		1	2	3	4		0.5	1	2.5	3		18.5	12.5	52.5
DNBS + veh	6B	1	2	3	4		1	2	2.5	4		Died
	7B	0	1.5	2.7	3.5		1	2	3	4		0	1.5	3	3.5		1	2	3	4		0	1.5	2.5	3		0.5	1.5	2.5	3.5		19	14	55
	8B	0	1	1.75	3		1	2.5	3.5	4		1.5	2	3.5	4		0.5	1.5	2.5	4		0.5	1.5	3.5	4		0	1	3	4		26	20	50
	6R	1	2	3	4		Died
	7R	0	1.5	2.7	3.5		0	0	2.5	4		0	1	2	3		0	0.5	2	3		0	1	2.5	3		0	1	2	3		30	17	50
	8R	0	1	1.75	3		0	1	2.5	3		0	1	2	2.5		0.5	1	2	3.5		0	0.5	2	3		0.5	1.5	2.5	3.5		21	12	52.5
veh + veh	1V	0	0	1	3		0	0	1.5	2.5		0	0	1	2.5		0	1	2	3		0	0	1.5	2.5		0	0	1.5	2.5		19	17.5	65
	2V	0	0	1.5	2.5		0	0.5	1.5	3		0	0	1.5	3		0	0	1	2.5		0	0.5	1	2		0	0.5	2	3		23	13.5	72.5
	3V	0	0	2	3		0	0	1	2.5		0	1	2	2.5		0	0.5	1.5	3		0	0	1.5	2.5		0	0	1	2		23	18	67.5
	4V	0	0	2	3.5		0	0.5	2	2.5		0.5	1.5	2.5	3		0.5	1	1.5	2.75		0	0	2	2.5		0	1	1.5	2.5		28	14	67.5

## Sheet: Disease activity
								Histology
Treatment	Animal	Macroscopic Damage Score	Colon lenght (cm)	Ceacum content (g)	Colon weight (g)			Microscopic Damage Score	Mast cell density	Eosinophil density
DNBS + FMTCTR	1B	1	12	4.69	1.4	0.116667		1	0.333333	0
	2B	0.5	12	4.29	1.26	0.105		4	0.333333	0
	3B	0.5	12	5.71	1.57	0.130833		3	4.33333	0.166667
	4B	3	11.5	3.63	1.94	0.168696		4	6.5	2.6
	5B	0.5	12.5	4.91	1.62	0.1296		1	5	2.33333
	9B	2	14	5.25	1.63	0.116429		0	2.8	5
	10B	2	10.5	4.93	1.46	0.139048		3	1	1.5
DNBS + FMTDNBS	1R	0.5	10.5	5.05	1.22	0.11619		3	2.4	0
	2R	1	12.5	4.49	1.66	0.1328		3	6.5	0.8
	3R	1	12	4.38	1.33	0.110833		5	7.4	1.33333
	4R	0.5	13.5	3.76	1.69	0.125185		2	6	2.6
	5R	1	14.5	4.91	1.97	0.135862		3	5.66667	3.4
	9R	3.5	9	5.89	1.81	0.201111		4	10	3.5
	10R	5	11	5.84	1.43	0.13		2	3.6	2.4
	11R	1	11.5	4.33	1.57	0.136522		2	6.1	1
