# Supplementary material for: Microbiome and gut as partners in the persistence of post-inflammatory visceral pain: insight into working mechanisms of faecal transplant for therapy advance
Source: Research Square preprint supplement (doi:10.21203/rs.3.rs-6025304/v1), 2025-10-20
Supplement: Supplementary file 5 [file ab5a20e12e98edd8cc21ecaf.xlsx]

## Sheet: Iba1
DISEASE PROTOCOL
		Iba1 immunoreactivity x 102
		Mucosa	Submucosa	Muscolaris
abx + FMTCTR	1N	109.14	52.2212	43.7344
	3N	104.744	59.703	46.6917
	4N	150.997	63.541	92.6755
	6N	103.578	35.7959	37.5416
	7N	97.5123	36.6086	45.0819
	8N	137.403	49.6902	47.7325
abx + FMTDNBS	1V	96.4411	39.0411	49.7894
	2V	174.453	89.342	64.8714
	3V	115.56	61.1049	35.0226
	4V	143.752	64.2156	85.6767
	7V	98.7501	38.0672	46.3728
	8V	122.615	52.9888	61.7382
THERAPY PROTOCOL
		Iba1 immunoreactivity x 102
		Mucosa	Submucosa	Muscolaris
DNBS + FMTCTR	2B	138.302	109.508	45.4434
	3B	130.59	89.3667	87.1037
	4B	275.297	172.513	143.319
	5B	127.812	82.0973	40.7712
	9B	171.203	115.795	67.168
	10B	342.048	130.274	123.074
DNBS + FMTDNBS	1R	211.734	83.3237	46.9858
	3R	59.1663	17.2912	22.5308
	4R	80.0472	42.292	43.9908
	5R	142.679	61.9816	41.8781
	10R	216.143	67.0163	69.4717
	11R	154.943	75.1668	76.8874

## Sheet: MHC II
DISEASE PROTOCOL
		MHC-II immunoreactivity
		Mucosa	Submucosa	Muscolaris
abx + FMTCTR	1N	49.1182	33.4322	15.9319
	3N	46.9002	28.5879	16.9514
	4N	50.0165	46.5324	22.4329
	6N	44.4366	44.338	19.0127
	7N	29.0103	54.3032	18.4
abx + FMTDNBS	1V	24.3823	18.7162	11.5483
	2V	25.0997	17.6993	8.7303
	3V	50.1745	19.6724	21.0698
	4V	37.9239	29.3252	12.7248
	7V	59.202	20.5	35.1998
	8V	28.4501	15.6447	15.1467
THERAPY PROTOCOL
		MHC-II immunoreactivity
		Mucosa	Submucosa	Muscolaris
DNBS + FMTCTR	2B	54.3952	34.0144	26.4608
	3B	47.1906	51.9299	47.422
	4B	59.7329	37.6343	23.7671
	5B	51.2803	39.597	27.2792
	9B	79.2341	62.4784	31.7458
	10B	60.8222	46.6131	27.9516
DNBS + FMTDNBS	1R	50.1298	54.1057	38.5642
	3R	56.4463	46.9494	44.8674
	4R	55.9781	53.1311	43.2177
	5R	49.2035	28.8298	12.4951
	10R	56.9733	42.0492	26.694

## Sheet: PGP 9.5
DISEASE PROTOCOL
		PgP 9.5 immunoreactivity (% of abx + FMTCTR)	PgP 9.5 positive cells density (x 103)		IENFs density		PgP 9.5 immunoreactivity
		Myenteric plexus			Mucosa		Mucosa	Submucosa	Muscolaris
abx + FMTCTR	1N	138.005	1.20251		11.9385		13.9551	33.233	41.668
	3N	80.9147	1.60279		9.31623		12.2985	24.6897	59.6218
	4N	76.375	0.955097		8.68921		11.0196	40.6603	52.4581
	6N	104.147	1.20304		7.3117		13.6115	34.7218	55.5938
	7N	76.7369	0.992246		15.2064		13.2217	44.2271	52.5
	8N	123.821	1.38754
abx + FMTDNBS	1V	178.476	1.34691		7.8309		10.5746	31.1411	38.4453
	2V	51.752	0.771816		14.3663		9.82973	26.4559	38.966
	3V	97.8318	1.46308		8.43488		21.9502	13.9099	40.7861
	4V	76.2356	0.877472		11.6994		16.1405	39.4684	45.5928
	7V	97.6799	1.19796		9.68655		13.8199	32.0701	44.0235
	8V	91.5601	1.40487		10.1233		15.4534	37.5517	46.6586
THERAPY PROTOCOL
		PgP 9.5 immunoreactivity (% of DNBS + FMTCTR)	PgP 9.5 positive cells density (x 103)		IENFs density		PgP 9.5 immunoreactivity
		Myenteric plexus			Mucosa		Mucosa	Submucosa	Muscolaris
DNBS + FMTCTR	2B	85.287	1.5028		15.8645		28.2465	44.127	51.9519
	3B	100.773	1.32851		13.5566		24.1258	36.4831	70.7915
	4B	107.216	1.6057		15.7614		35.8488	64.7778	120.414
	5B	107.89	1.65458		12.2993		44.2172	87.37	137.268
	9B	70.4812	1.7479		12.0754		23.0107	43.8362	127.534
	10B	128.353	1.48539
DNBS + FMTDNBS	1R	104.453	1.3674		14.933		33.5094	41.4726	115.317
	3R	166.034	1.34805		13.6162		19.8136	44.6546	72.084
	4R	22.7796	1.35131		11.557		19.3154	29.0798	102.292
	5R	157.009	1.30043		11.6982		16.6386	25.3938	38.6996
	10R	121.779	1.2119		13.6856		35.3421	71.3183	139.225
	11R	89.108	1.03323		9.09655		30.6504	107.217	89.8182

## Sheet: GFAP
DISEASE PROTOCOL
		GFAP immunoreactivity (% of abx + FMTCTR)
		Myenteric plexus
abx + FMTCTR	1N	51.5033
	4N	95.716
	6N	83.8036
	7N	180.19
	8N	88.7866
abx + FMTDNBS	1V	57.5895
	2V	80.469
	3V	52.7125
	4V	76.8171
	7V	63.2792
	8V	68.268
THERAPY PROTOCOL
		GFAP immunoreactivity (% of DNBS + FMTCTR)
		Myenteric plexus
DNBS + FMTCTR	2B	68.7834
	3B	67.3903
	4B	94.8523
	5B	98.9855
	9B	54.0292
	10B	215.959
DNBS + FMTDNBS	1R	243.519
	3R	46.3951
	4R	47.8703
	5R	129.859
	10R	64.0651
	11R	183.977
