# Supplementary material for: Microbiome and gut as partners in the persistence of post-inflammatory visceral pain: insight into working mechanisms of faecal transplant for therapy advance
Source: Research Square preprint supplement (doi:10.21203/rs.3.rs-6025304/v1), 2025-10-20
Supplement: Supplementary file 6 [file c62973f269e3b90a4993bbcb.docx]

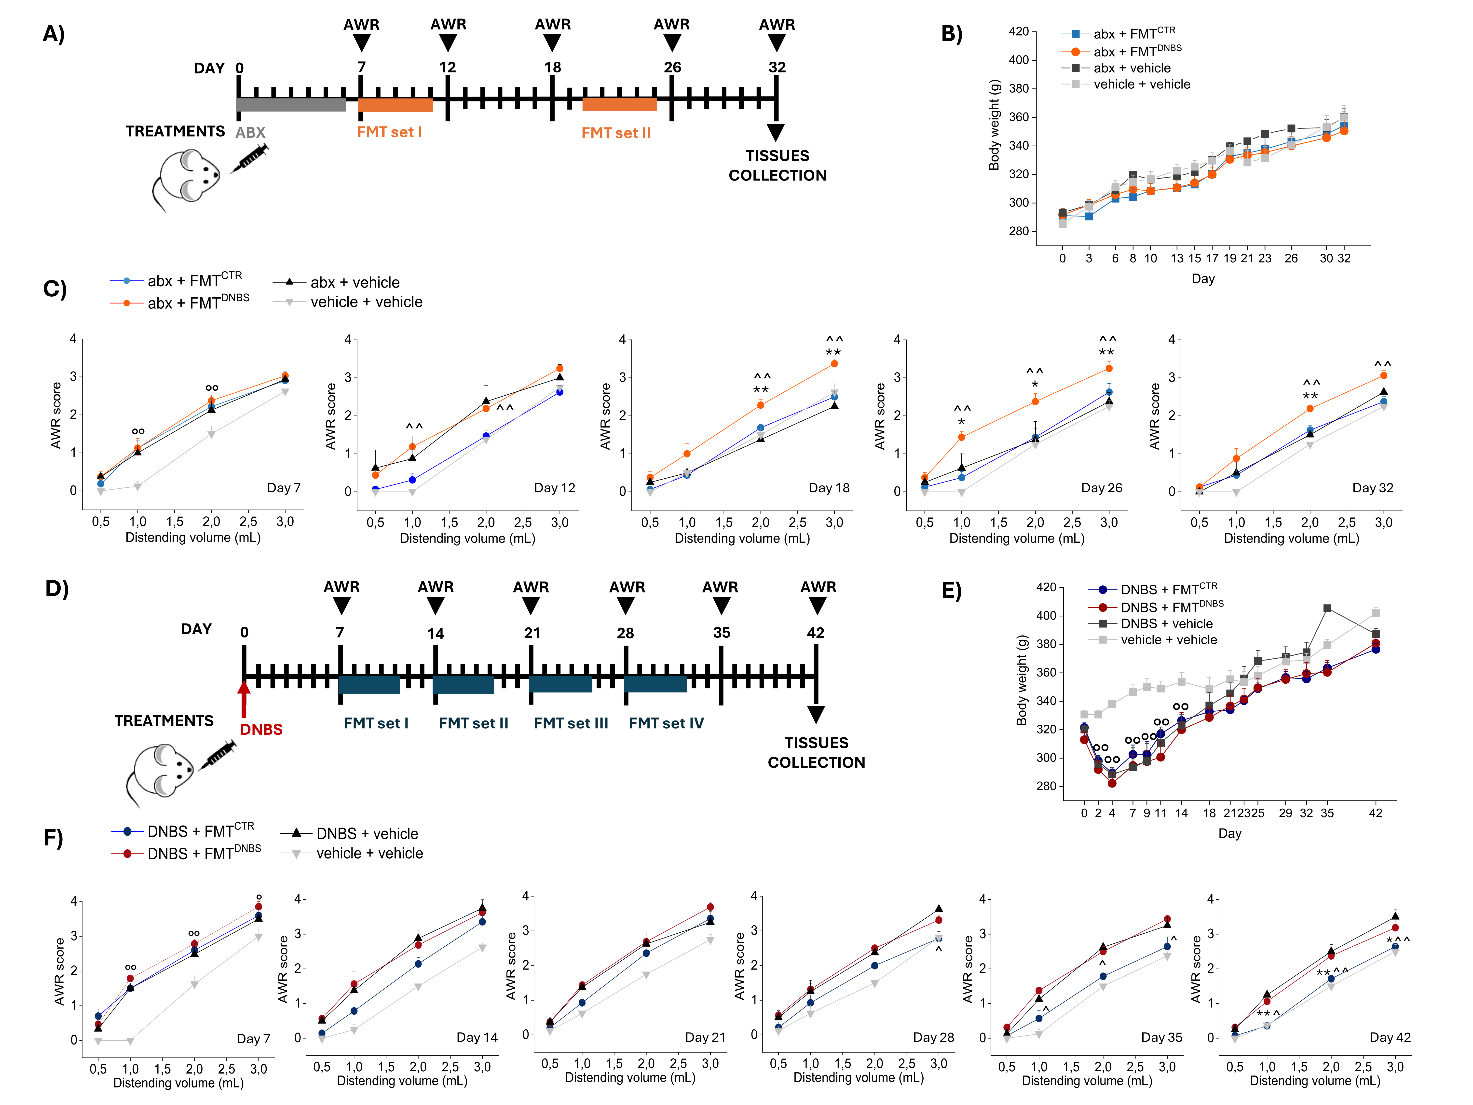


**Supplementary Figure 1 (Figure S1)**


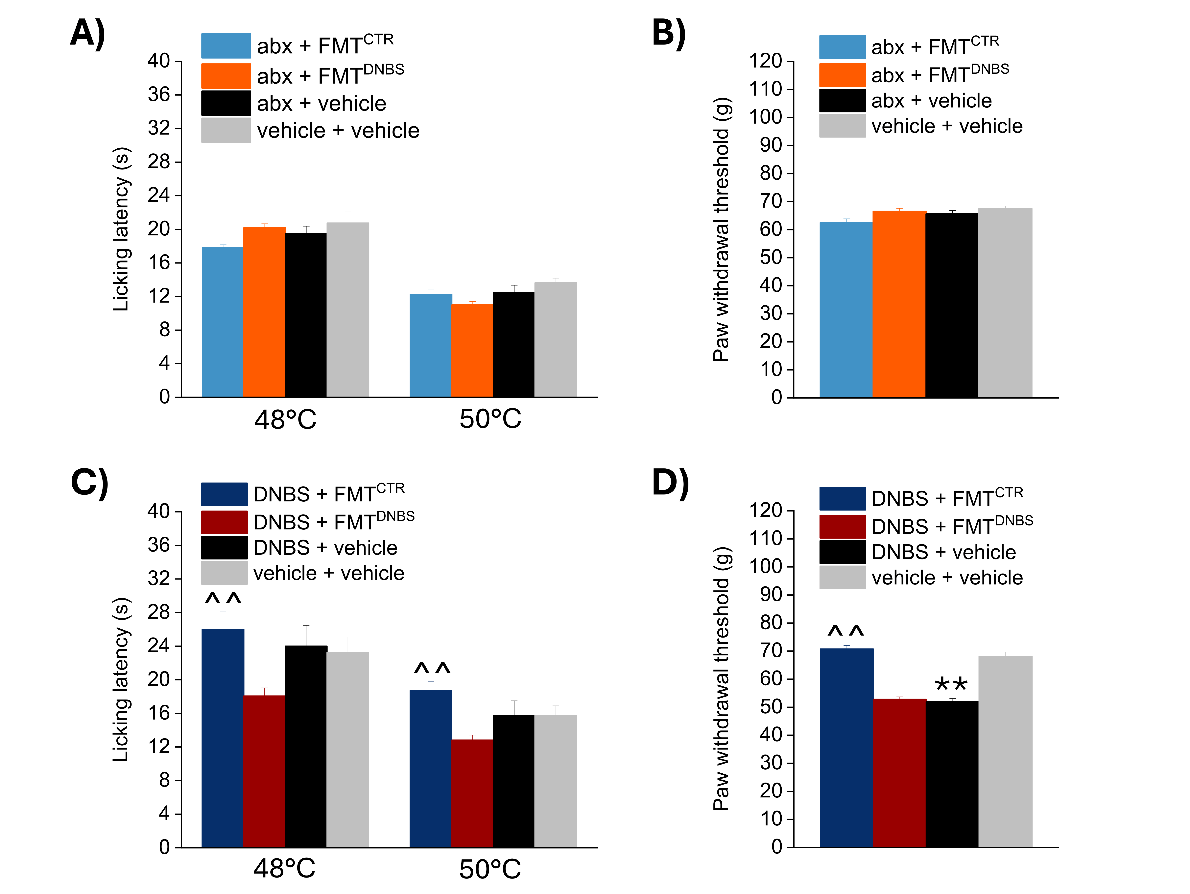


**Supplementary Figure 2 (Figure S2)**


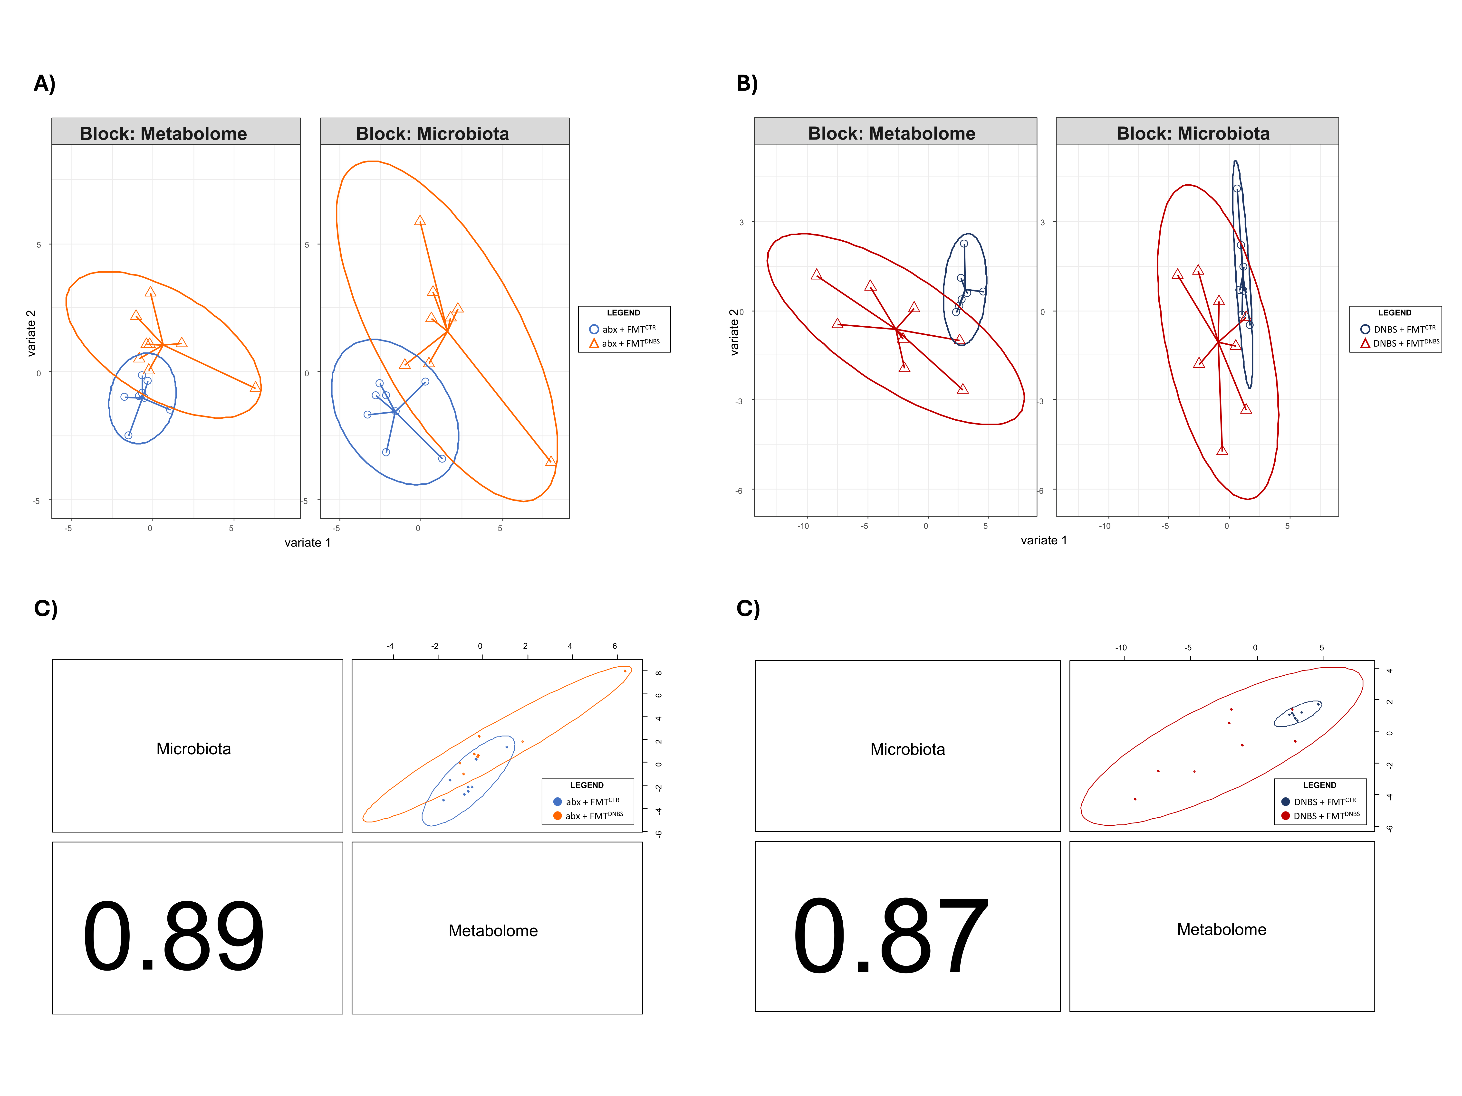


**Supplementary Figure 3 (Figure S3)**


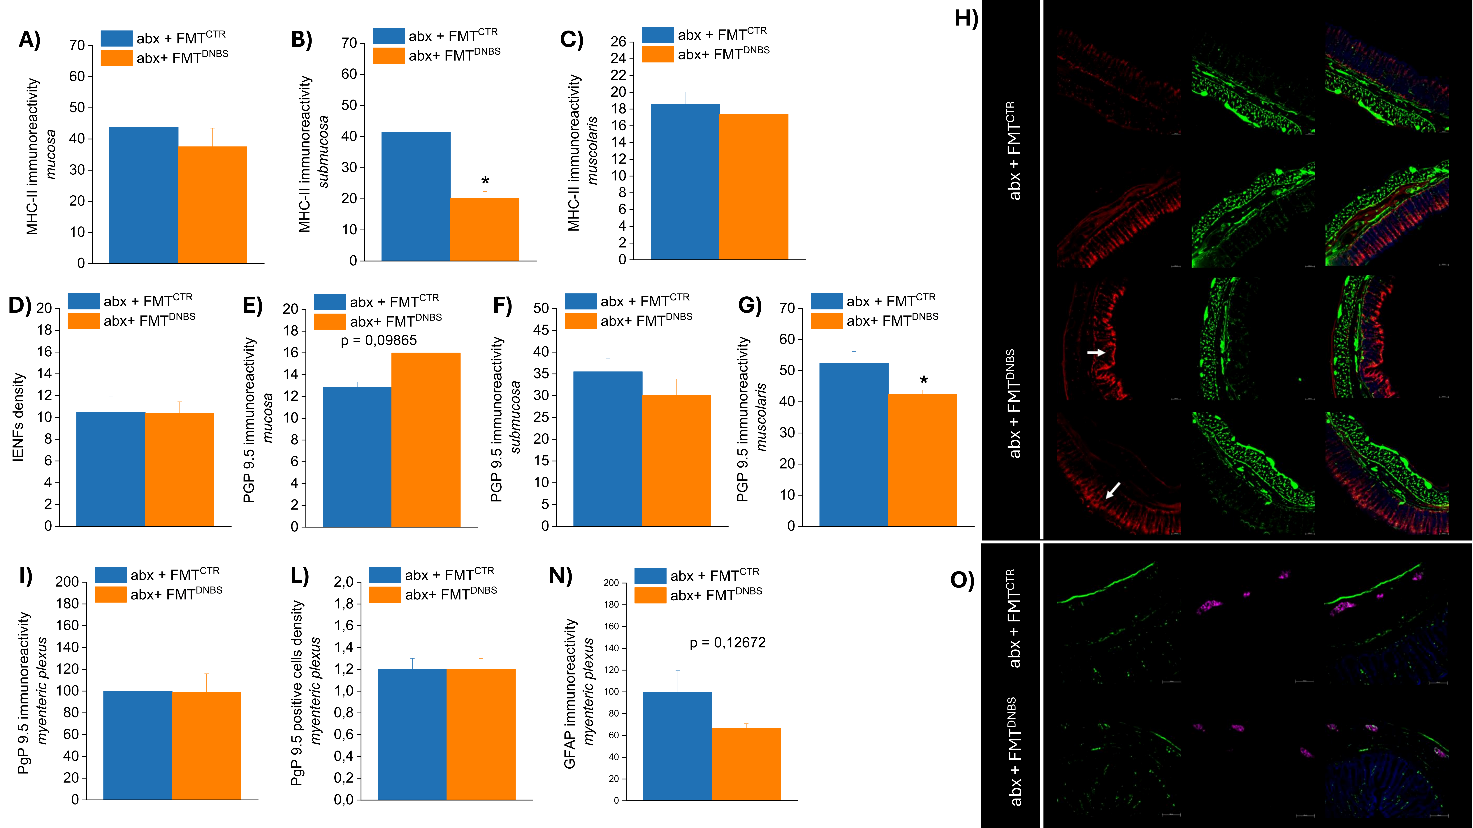


**Supplementary Figure 4 (Figure S4)**


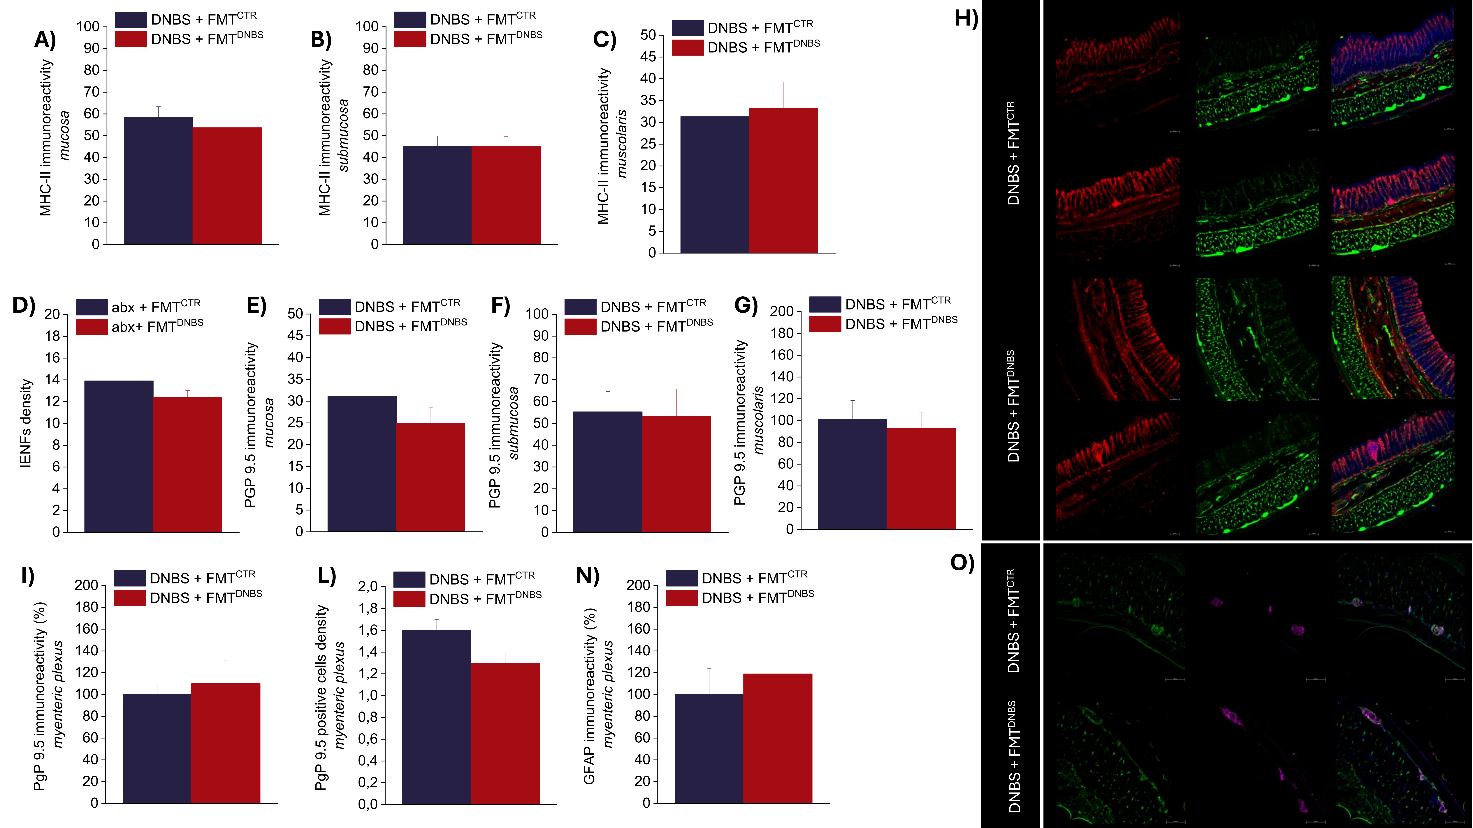


**Supplementary Figure 5 (Figure S5)**


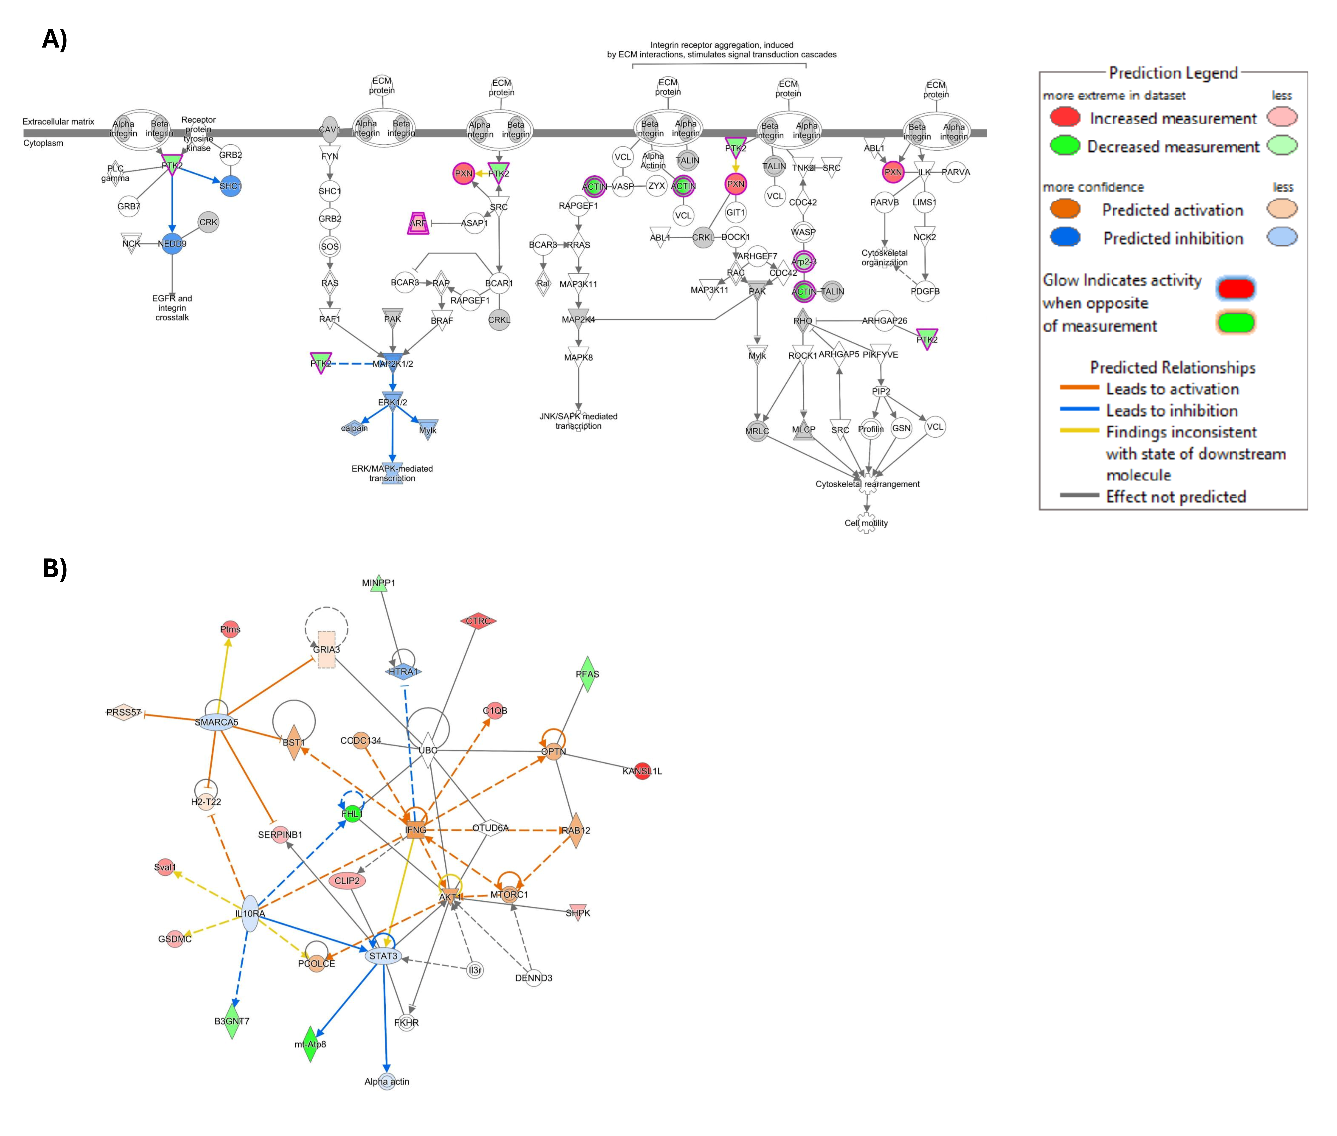


**Supplementary Figure 6 (Figure S6)**


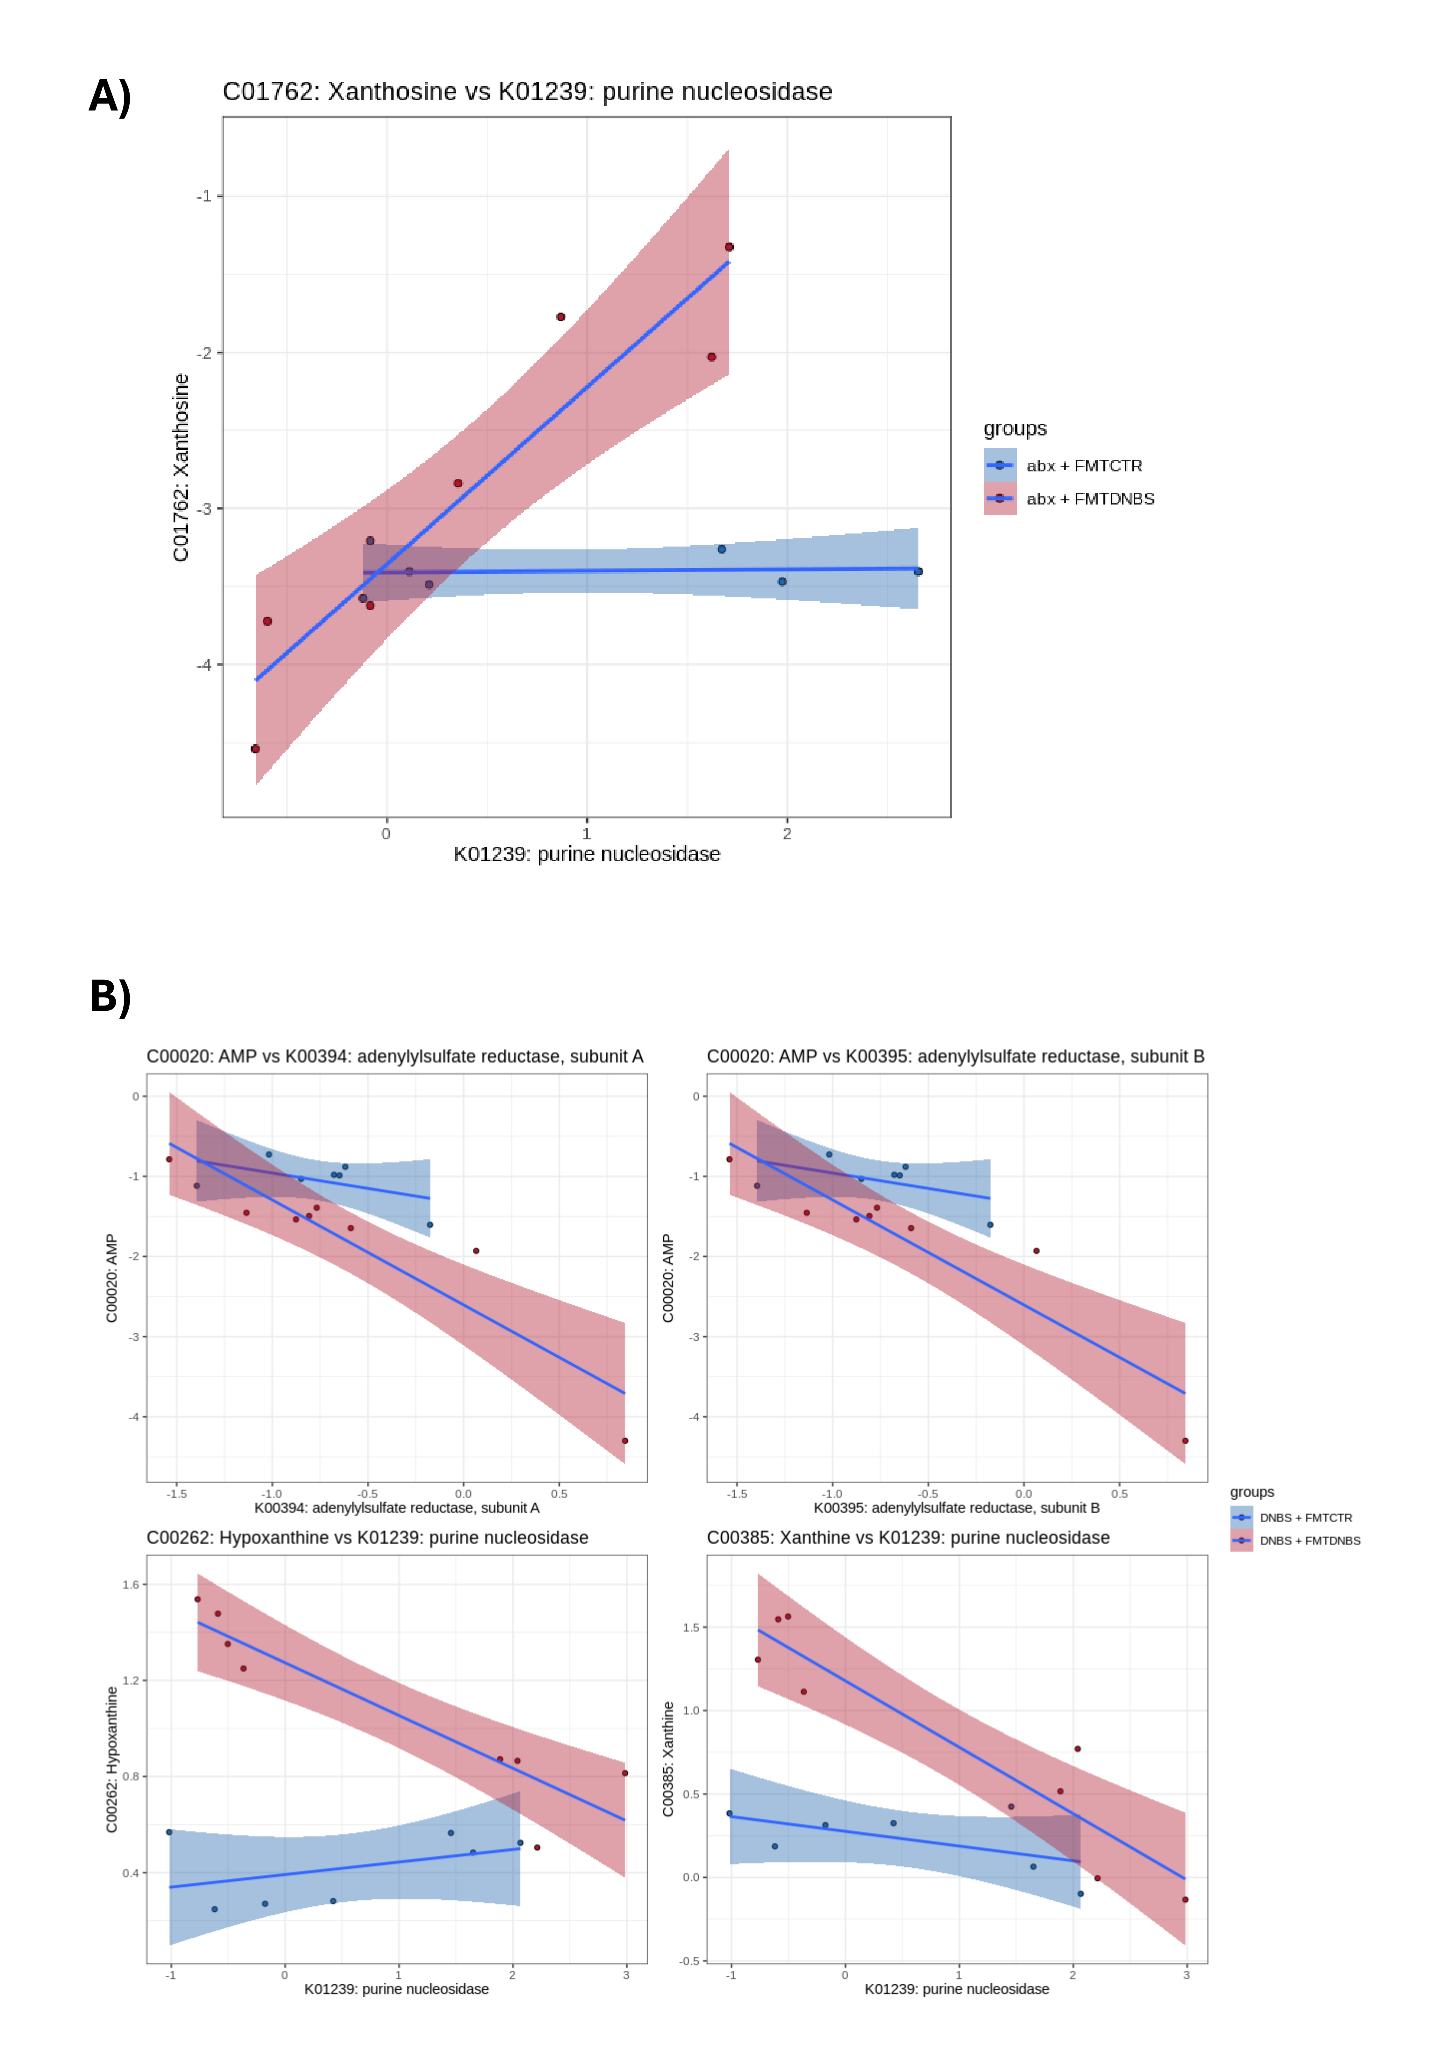


**Supplementary Figure 7 (Figure S7)**
